# Supplementary material for: Mechanism of EHMT2-mediated genomic imprinting associated with Prader-Willi syndrome
Source: Research Square preprint supplement (doi:10.21203/rs.3.rs-4530649/v1), 2024-07-03
Supplement: Supplementary file 1 [file 2547f8a1933c60fd4d16b8c5.xlsx]

## Sheet: Antibodies
Antibodies used in Western-blotting and IP
Antigen	Manufacturer	Species, type	Catalog #	Application
EHMT2	Invitrogen	Mouse monoclonal	435200	WB (1:1000) / IP (2 μg)
EHMT2/G9a	Cell signaling	Rabbit monoclonal	3306	WB (1:1000) / IP (2 μg)
H3K9me2	Abcam	Mouse monoclonal	ab1220	WB (1:1000) /ChIP (2 μg)
H3K9ac	Abcam	Rabbit monoclonal	ab32129	ChIP (2 μg)
Histone H3	Invitrogen	Rabbit polyclonal	PA5-16183	WB (1:2000)
SUV39H1	Invitrogen	Mouse monoclonal	MA1-25505	WB (1:1000)
HP1α	Invitrogen	Mouse monoclonal	MA1-218	WB (1:1000)
DNMT1	Invitrogen	Mouse monoclonal	MA5-16169	WB (1:1000)
β-actin (HRP)	Cell signaling	Mouse monoclonal	12262S	WB (1:5000)
GAPDH (HRP)	Cell signaling	Rabbit monoclonal	8884S	WB (1:5000)

## Sheet: Primer sequences
Gene		5’----------Forward----------3’	5’ ----------Reverse----------3’
Mouse
mRNA	Snrpn	TTGGTTCTGAGGAGTGATTTGC	CCTTGAATTCCACCACCTTG
	Ex3-EGFP	AGGTGGTGGAATTCAGTGGA	CGGTGGTGCAGATGAACTTC
	Gapdh	GGCAAATTCAACGGCACAGT	GGGTCTCGCTCCTGGAAGAT
ChIP	PWS-IC_1	ATCTACCCCAGGTGTGCTTG	AAACAACCCCCTCCTTCACT
	PWS-IC_2	CAAGCCTGGGCCTCATAATA	TATTCACCAGGGCCTTTCAG
	Gapdh	AGAGAGGGAGGAGGGGAAATG	AACAGGGAGGAGCAGAGAGCAC
Human
ChIP	a’	GATGGTATCCTGTCCGCTCG	TCACCCTGATGTACCCACCT
	b’	CAGGGTGATTGCAGTTCCGT	CCTACCTCCGCCTAAAATCCC
	c’	GTTGCGTCACTGCCATTGTG	GGTACGGCTGAAACTCCGAA
	chr15:2477	AGGAAATGCGCCATTGTTCG	TCCTAGCAGACGCCATAAGC
	3057-3406
	GAPDH	GCATCACCCGGAGGAGAAATCGG	GTCACGTGTCGCAGAGGAGC
Methyl Specific	SNRPN Ex1	TGCGGTAAATAAGTACGTTTGC	TACGTCAAACATCTCCGACG
mRNA	SNRPN	CCACCAGGCATTAGAGGTCCAC	GCAGAATGAGGGAACAAAAAGCTC
	SNORD116	TGGATCGATGATGAGTCC	TGGACCTCAGTTCCGATGAGA
	IPW	CTGTGGTCTCTTGGACACCC	GCGGAAGGAAGACTGTGTCA
	β-actin	AGAGCTACGAGCTGCCTGAC	AGCACTGTGTTGGCGTACAG
RIP/ChIP	ENSG00000280118	CTAAGGAATGCATTTGTTGTGC	TTTACCAAGCTGACAACATTTTAAC
	(int2 – Ex3)
	ENSG00000280118	CGCGGAAACTTTAACCTGCGT	GCCCGTACTGGATCTGGAGG
	(ex1 – ex3)
