# Supplementary material for: Mechanism of EHMT2-mediated genomic imprinting associated with Prader-Willi syndrome
Source: Research Square preprint supplement (doi:10.21203/rs.3.rs-4530649/v1), 2024-07-03
Supplement: Supplementary file 2 [file 4bcb2768ff33beedee5a9467.xlsx]

## Sheet: Sheet1
AS-FB_inter(MAPQ>0)	AS-FB (MAPQ>30)	PWS-FB (MAPQ>0)	PWS-FB (MAPQ>30)
Read type: Paired End	Read type: Paired End	Read type: Paired End	Read type: Paired End
Sequenced Read Pairs: 2,805,145	Sequenced Read Pairs: 2,805,145	Sequenced Read Pairs: 2,744,765	Sequenced Read Pairs: 2,744,765
No chimera found: 25,062 (0.89%)	No chimera found: 25,062 (0.89%)	No chimera found: 17,533 (0.64%)	No chimera found: 17,533 (0.64%)
One or both reads unmapped: 25,062 (0.89%)	One or both reads unmapped: 25,062 (0.89%)	One or both reads unmapped: 17,533 (0.64%)	One or both reads unmapped: 17,533 (0.64%)
2 alignments: 2,477,939 (88.34%)	2 alignments: 2,477,939 (88.34%)	2 alignments: 2,418,808 (88.12%)	2 alignments: 2,418,808 (88.12%)
2 alignments (A...B): 1,143,785 (40.77%)	2 alignments (A...B): 1,143,785 (40.77%)	2 alignments (A...B): 1,060,059 (38.62%)	2 alignments (A...B): 1,060,059 (38.62%)
2 alignments (A1...A2B; A1B2...B1A2): 1,334,154 (47.56%)	2 alignments (A1...A2B; A1B2...B1A2): 1,334,154 (47.56%)	2 alignments (A1...A2B; A1B2...B1A2): 1,358,749 (49.50%)	2 alignments (A1...A2B; A1B2...B1A2): 1,358,749 (49.50%)
3 or more alignments: 302,144 (10.77%)	3 or more alignments: 302,144 (10.77%)	3 or more alignments: 308,424 (11.24%)	3 or more alignments: 308,424 (11.24%)
Ligation Motif Present: N/A	Ligation Motif Present: N/A	Ligation Motif Present: N/A	Ligation Motif Present: N/A
Average insert size: 332.20	Average insert size: 332.20	Average insert size: 320.80	Average insert size: 320.80
Total Unique: 2,172,892 (87.69%, 77.46%)	Total Unique: 2,172,892 (87.69%, 77.46%)	Total Unique: 2,157,976 (89.22%, 78.62%)	Total Unique: 2,157,976 (89.22%, 78.62%)
Total Duplicates: 305,047 (12.31%, 10.87%)	Total Duplicates: 305,047 (12.31%, 10.87%)	Total Duplicates: 260,832 (10.78%, 9.50%)	Total Duplicates: 260,832 (10.78%, 9.50%)
Library Complexity Estimate*: 9,220,180	Library Complexity Estimate*: 9,220,180	Library Complexity Estimate*: 10,393,668	Library Complexity Estimate*: 10,393,668
Intra-fragment Reads: N/A	Intra-fragment Reads: N/A	Intra-fragment Reads: N/A	Intra-fragment Reads: N/A
Below MAPQ Threshold: 228,845 (8.16% / 10.53%)	Below MAPQ Threshold: 333,316 (11.88% / 15.34%)	Below MAPQ Threshold: 237,455 (8.65% / 11.00%)	Below MAPQ Threshold: 342,937 (12.49% / 15.89%)
Hi-C Contacts: 1,944,047 (69.30% / 89.47%)	Hi-C Contacts: 1,839,576 (65.58% / 84.66%)	Hi-C Contacts: 1,920,521 (69.97% / 89.00%)	Hi-C Contacts: 1,815,039 (66.13% / 84.11%)
3' Bias (Long Range): 50% - 50%	3' Bias (Long Range): 50% - 50%	3' Bias (Long Range): 50% - 50%	3' Bias (Long Range): 50% - 50%
Pair Type %(L-I-O-R): 25% - 25% - 25% - 25%	Pair Type %(L-I-O-R): 25% - 25% - 25% - 25%	Pair Type %(L-I-O-R): 25% - 25% - 25% - 25%	Pair Type %(L-I-O-R): 25% - 25% - 25% - 25%
L-I-O-R Convergence: 1874	L-I-O-R Convergence: 1874	L-I-O-R Convergence: 1520	L-I-O-R Convergence: 1520
Inter-chromosomal: 176,065 (6.28% / 8.10%)	Inter-chromosomal: 155,552 (5.55% / 7.16%)	Inter-chromosomal: 185,194 (6.75% / 8.58%)	Inter-chromosomal: 163,475 (5.96% / 7.58%)
Intra-chromosomal: 1,767,982 (63.03% / 81.37%)	Intra-chromosomal: 1,684,024 (60.03% / 77.50%)	Intra-chromosomal: 1,735,327 (63.22% / 80.41%)	Intra-chromosomal: 1,651,564 (60.17% / 76.53%)
Short Range (<20Kb):	Short Range (<20Kb):	Short Range (<20Kb):	Short Range (<20Kb):
<500BP: 250,664 (8.94% / 11.54%)	<500BP: 242,623 (8.65% / 11.17%)	<500BP: 244,060 (8.89% / 11.31%)	<500BP: 236,217 (8.61% / 10.95%)
500BP-5kB: 208,990 (7.45% / 9.62%)	500BP-5kB: 199,495 (7.11% / 9.18%)	500BP-5kB: 203,307 (7.41% / 9.42%)	500BP-5kB: 193,553 (7.05% / 8.97%)
5kB-20kB: 201,164 (7.17% / 9.26%)	5kB-20kB: 191,403 (6.82% / 8.81%)	5kB-20kB: 202,674 (7.38% / 9.39%)	5kB-20kB: 192,927 (7.03% / 8.94%)
Long Range (>20Kb): 1,107,164 (39.47% / 50.95%)	Long Range (>20Kb): 1,050,503 (37.45% / 48.35%)	Long Range (>20Kb): 1,085,286 (39.54% / 50.29%)	Long Range (>20Kb): 1,028,867 (37.48% / 47.68%)
