# Supplementary material for: Mechanism of EHMT2-mediated genomic imprinting associated with Prader-Willi syndrome
Source: Research Square preprint supplement (doi:10.21203/rs.3.rs-4530649/v1), 2024-07-03
Supplement: Supplementary file 3 [file 7d8351791853b23b844d2459.xlsx]

## Sheet: Chromatin Tracing Library
3_chr15:23500000-23550000_Seq_7_125-154	GCGTCGTTATGGTGCAACGTGACTTTGTGGGTACGTTGATcaagaagagagaaatagcccaaaatgttatGACTTTGTGGGTACGTTGATGACTTTGTGGGTACGTTGATCGACACCGAACGTGCGACAA
6_chr15:23500000-23550000_Seq_14_275-304	GCGTCGTTATGGTGCAACGTGACTTTGTGGGTACGTTGATgccaaagtgagaggatcatttgaggccaggGACTTTGTGGGTACGTTGATGACTTTGTGGGTACGTTGATCGACACCGAACGTGCGACAA
9_chr15:23500000-23550000_Seq_18_389-418	GCGTCGTTATGGTGCAACGTGACTTTGTGGGTACGTTGATcagcacacacctgtagtcccagatatttggGACTTTGTGGGTACGTTGATGACTTTGTGGGTACGTTGATCGACACCGAACGTGCGACAA
12_chr15:23500000-23550000_Seq_22_469-498	GCGTCGTTATGGTGCAACGTGACTTTGTGGGTACGTTGATagctatgattgcaccattgtaccctagcctGACTTTGTGGGTACGTTGATGACTTTGTGGGTACGTTGATCGACACCGAACGTGCGACAA
15_chr15:23500000-23550000_Seq_28_589-618	GCGTCGTTATGGTGCAACGTGACTTTGTGGGTACGTTGATtcaagtgaccatctgataaggagactgctaGACTTTGTGGGTACGTTGATGACTTTGTGGGTACGTTGATCGACACCGAACGTGCGACAA
18_chr15:23500000-23550000_Seq_31_649-678	GCGTCGTTATGGTGCAACGTGACTTTGTGGGTACGTTGATtgtttctcaaaacaatgacagaataaccagGACTTTGTGGGTACGTTGATGACTTTGTGGGTACGTTGATCGACACCGAACGTGCGACAA
21_chr15:23500000-23550000_Seq_37_769-798	GCGTCGTTATGGTGCAACGTGACTTTGTGGGTACGTTGATctgaatttgagcacagttgtcctgggccacGACTTTGTGGGTACGTTGATGACTTTGTGGGTACGTTGATCGACACCGAACGTGCGACAA
24_chr15:23500000-23550000_Seq_40_829-858	GCGTCGTTATGGTGCAACGTGACTTTGTGGGTACGTTGATagcataggccatggtggtctcccctccacaGACTTTGTGGGTACGTTGATGACTTTGTGGGTACGTTGATCGACACCGAACGTGCGACAA
27_chr15:23500000-23550000_Seq_44_909-938	GCGTCGTTATGGTGCAACGTGACTTTGTGGGTACGTTGATaagcacaaaatgcataaaccatgggggtgtGACTTTGTGGGTACGTTGATGACTTTGTGGGTACGTTGATCGACACCGAACGTGCGACAA
30_chr15:23500000-23550000_Seq_47_969-998	GCGTCGTTATGGTGCAACGTGACTTTGTGGGTACGTTGATagccagggagaccctcaggctcaagactcaGACTTTGTGGGTACGTTGATGACTTTGTGGGTACGTTGATCGACACCGAACGTGCGACAA
33_chr15:23500000-23550000_Seq_50_1029-1058	GCGTCGTTATGGTGCAACGTGACTTTGTGGGTACGTTGATcacagagagtcgccactagggttatacctaGACTTTGTGGGTACGTTGATGACTTTGTGGGTACGTTGATCGACACCGAACGTGCGACAA
36_chr15:23500000-23550000_Seq_56_1149-1178	GCGTCGTTATGGTGCAACGTGACTTTGTGGGTACGTTGATgattaggcagaactctcatgaatagtattaGACTTTGTGGGTACGTTGATGACTTTGTGGGTACGTTGATCGACACCGAACGTGCGACAA
39_chr15:23500000-23550000_Seq_59_1209-1238	GCGTCGTTATGGTGCAACGTGACTTTGTGGGTACGTTGATgctcacccttctatcatataaggacacaacGACTTTGTGGGTACGTTGATGACTTTGTGGGTACGTTGATCGACACCGAACGTGCGACAA
42_chr15:23500000-23550000_Seq_62_1269-1298	GCGTCGTTATGGTGCAACGTGACTTTGTGGGTACGTTGATctcaccagatatcaaatataccagcacctaGACTTTGTGGGTACGTTGATGACTTTGTGGGTACGTTGATCGACACCGAACGTGCGACAA
45_chr15:23500000-23550000_Seq_65_1354-1383	GCGTCGTTATGGTGCAACGTGACTTTGTGGGTACGTTGATaagtactcagtctttactattttgttatggGACTTTGTGGGTACGTTGATGACTTTGTGGGTACGTTGATCGACACCGAACGTGCGACAA
48_chr15:23500000-23550000_Seq_71_1474-1503	GCGTCGTTATGGTGCAACGTGACTTTGTGGGTACGTTGATttgaggtaccacacagtagtccagaagggcGACTTTGTGGGTACGTTGATGACTTTGTGGGTACGTTGATCGACACCGAACGTGCGACAA
51_chr15:23500000-23550000_Seq_74_1534-1563	GCGTCGTTATGGTGCAACGTGACTTTGTGGGTACGTTGATctgaggctgagaagtttttgaaatagatacGACTTTGTGGGTACGTTGATGACTTTGTGGGTACGTTGATCGACACCGAACGTGCGACAA
54_chr15:23500000-23550000_Seq_78_1620-1649	GCGTCGTTATGGTGCAACGTGACTTTGTGGGTACGTTGATgaatagaatcagaaatgtaaatacatagggGACTTTGTGGGTACGTTGATGACTTTGTGGGTACGTTGATCGACACCGAACGTGCGACAA
57_chr15:23500000-23550000_Seq_84_1760-1789	GCGTCGTTATGGTGCAACGTGACTTTGTGGGTACGTTGATgggaacccaaacatcctggagtgcacaggtGACTTTGTGGGTACGTTGATGACTTTGTGGGTACGTTGATCGACACCGAACGTGCGACAA
59_chr15:23500000-23550000_Seq_87_1860-1889	GCGTCGTTATGGTGCAACGTGACTTTGTGGGTACGTTGATtagaaatgtctggtagggaaggtctctggaGACTTTGTGGGTACGTTGATGACTTTGTGGGTACGTTGATCGACACCGAACGTGCGACAA
62_chr15:23500000-23550000_Seq_94_2000-2029	GCGTCGTTATGGTGCAACGTGACTTTGTGGGTACGTTGATgttgtgggggcattcttctaaatattcctgGACTTTGTGGGTACGTTGATGACTTTGTGGGTACGTTGATCGACACCGAACGTGCGACAA
65_chr15:23500000-23550000_Seq_98_2104-2133	GCGTCGTTATGGTGCAACGTGACTTTGTGGGTACGTTGATtgtagcagtctactatgaggcaatcttcatGACTTTGTGGGTACGTTGATGACTTTGTGGGTACGTTGATCGACACCGAACGTGCGACAA
68_chr15:23500000-23550000_Seq_105_2303-2332	GCGTCGTTATGGTGCAACGTGACTTTGTGGGTACGTTGATctgttttatcaatccaatttgtaaatgccaGACTTTGTGGGTACGTTGATGACTTTGTGGGTACGTTGATCGACACCGAACGTGCGACAA
71_chr15:23500000-23550000_Seq_113_2537-2566	GCGTCGTTATGGTGCAACGTGACTTTGTGGGTACGTTGATccagtattaaagtcatgaagttttgtcaacGACTTTGTGGGTACGTTGATGACTTTGTGGGTACGTTGATCGACACCGAACGTGCGACAA
74_chr15:23500000-23550000_Seq_118_2695-2724	GCGTCGTTATGGTGCAACGTGACTTTGTGGGTACGTTGATattacaaaactttgtttcatcatcagcatcGACTTTGTGGGTACGTTGATGACTTTGTGGGTACGTTGATCGACACCGAACGTGCGACAA
77_chr15:23500000-23550000_Seq_121_2809-2838	GCGTCGTTATGGTGCAACGTGACTTTGTGGGTACGTTGATtttttgttATGGGTTTCTAGCCACCTAAAGGACTTTGTGGGTACGTTGATGACTTTGTGGGTACGTTGATCGACACCGAACGTGCGACAA
80_chr15:23500000-23550000_Seq_124_2869-2898	GCGTCGTTATGGTGCAACGTGACTTTGTGGGTACGTTGATACTCATAGTACTGAACTTCTAGGTGGTTACGACTTTGTGGGTACGTTGATGACTTTGTGGGTACGTTGATCGACACCGAACGTGCGACAA
83_chr15:23500000-23550000_Seq_127_2929-2958	GCGTCGTTATGGTGCAACGTGACTTTGTGGGTACGTTGATCCACCTTATGGGTATCTATCTCttgttccaGACTTTGTGGGTACGTTGATGACTTTGTGGGTACGTTGATCGACACCGAACGTGCGACAA
86_chr15:23500000-23550000_Seq_130_2989-3018	GCGTCGTTATGGTGCAACGTGACTTTGTGGGTACGTTGATagtttgtaccttgagatttatagtggtctcGACTTTGTGGGTACGTTGATGACTTTGTGGGTACGTTGATCGACACCGAACGTGCGACAA
89_chr15:23500000-23550000_Seq_133_3049-3078	GCGTCGTTATGGTGCAACGTGACTTTGTGGGTACGTTGATtccaaggtatcagtctgttaggttaacatgGACTTTGTGGGTACGTTGATGACTTTGTGGGTACGTTGATCGACACCGAACGTGCGACAA
92_chr15:23500000-23550000_Seq_136_3109-3138	GCGTCGTTATGGTGCAACGTGACTTTGTGGGTACGTTGATgttagaggtcttgcaatatttaagcaatggGACTTTGTGGGTACGTTGATGACTTTGTGGGTACGTTGATCGACACCGAACGTGCGACAA
95_chr15:23500000-23550000_Seq_139_3169-3198	GCGTCGTTATGGTGCAACGTGACTTTGTGGGTACGTTGATttgagacattagatatttttccttgcccctGACTTTGTGGGTACGTTGATGACTTTGTGGGTACGTTGATCGACACCGAACGTGCGACAA
98_chr15:23500000-23550000_Seq_142_3229-3258	GCGTCGTTATGGTGCAACGTGACTTTGTGGGTACGTTGATagggtgtgaccaatgatagtcctcagcgtcGACTTTGTGGGTACGTTGATGACTTTGTGGGTACGTTGATCGACACCGAACGTGCGACAA
101_chr15:23500000-23550000_Seq_145_3289-3318	GCGTCGTTATGGTGCAACGTGACTTTGTGGGTACGTTGATgtgaagtacacagcagcaacaaagataggtGACTTTGTGGGTACGTTGATGACTTTGTGGGTACGTTGATCGACACCGAACGTGCGACAA
104_chr15:23500000-23550000_Seq_148_3349-3378	GCGTCGTTATGGTGCAACGTGACTTTGTGGGTACGTTGATtgaaatcaaggtgtcatttctgtatgttggGACTTTGTGGGTACGTTGATGACTTTGTGGGTACGTTGATCGACACCGAACGTGCGACAA
107_chr15:23500000-23550000_Seq_151_3409-3438	GCGTCGTTATGGTGCAACGTGACTTTGTGGGTACGTTGATgatcaactgaaacacaggggaaaactagagGACTTTGTGGGTACGTTGATGACTTTGTGGGTACGTTGATCGACACCGAACGTGCGACAA
110_chr15:23500000-23550000_Seq_155_3490-3519	GCGTCGTTATGGTGCAACGTGACTTTGTGGGTACGTTGATGGCCAGGGTTATTGGtctcattgtctaaggGACTTTGTGGGTACGTTGATGACTTTGTGGGTACGTTGATCGACACCGAACGTGCGACAA
113_chr15:23500000-23550000_Seq_158_3550-3579	GCGTCGTTATGGTGCAACGTGACTTTGTGGGTACGTTGATgaaaattaatgagcatcaacacagaaggtgGACTTTGTGGGTACGTTGATGACTTTGTGGGTACGTTGATCGACACCGAACGTGCGACAA
115_chr15:23500000-23550000_Seq_167_3730-3759	GCGTCGTTATGGTGCAACGTGACTTTGTGGGTACGTTGATtctgaaaatctctctgcacaactccccctcGACTTTGTGGGTACGTTGATGACTTTGTGGGTACGTTGATCGACACCGAACGTGCGACAA
118_chr15:23500000-23550000_Seq_176_3910-3939	GCGTCGTTATGGTGCAACGTGACTTTGTGGGTACGTTGATtttttcctacgggcctgccaattacacaaaGACTTTGTGGGTACGTTGATGACTTTGTGGGTACGTTGATCGACACCGAACGTGCGACAA
121_chr15:23500000-23550000_Seq_182_4030-4059	GCGTCGTTATGGTGCAACGTGACTTTGTGGGTACGTTGATatttttcaggcagactgtttctctgaggacGACTTTGTGGGTACGTTGATGACTTTGTGGGTACGTTGATCGACACCGAACGTGCGACAA
124_chr15:23500000-23550000_Seq_185_4091-4120	GCGTCGTTATGGTGCAACGTGACTTTGTGGGTACGTTGATctttcttctccctcaTTCCATGccccttcaGACTTTGTGGGTACGTTGATGACTTTGTGGGTACGTTGATCGACACCGAACGTGCGACAA
127_chr15:23500000-23550000_Seq_192_4231-4260	GCGTCGTTATGGTGCAACGTGACTTTGTGGGTACGTTGATctggtataagggccctcagaagaaaggcatGACTTTGTGGGTACGTTGATGACTTTGTGGGTACGTTGATCGACACCGAACGTGCGACAA
130_chr15:23500000-23550000_Seq_199_4397-4426	GCGTCGTTATGGTGCAACGTGACTTTGTGGGTACGTTGATctgaaataccctgataacttgttgctatagGACTTTGTGGGTACGTTGATGACTTTGTGGGTACGTTGATCGACACCGAACGTGCGACAA
133_chr15:23500000-23550000_Seq_205_4517-4546	GCGTCGTTATGGTGCAACGTGACTTTGTGGGTACGTTGATgccactctatttacgcttattacctcgcagGACTTTGTGGGTACGTTGATGACTTTGTGGGTACGTTGATCGACACCGAACGTGCGACAA
136_chr15:23500000-23550000_Seq_213_4677-4706	GCGTCGTTATGGTGCAACGTGACTTTGTGGGTACGTTGATagtgcaggcaaaaacataaaaacagccaatGACTTTGTGGGTACGTTGATGACTTTGTGGGTACGTTGATCGACACCGAACGTGCGACAA
139_chr15:23500000-23550000_Seq_230_5071-5100	GCGTCGTTATGGTGCAACGTGACTTTGTGGGTACGTTGATactgcaggttaggaaccaggtacggggactGACTTTGTGGGTACGTTGATGACTTTGTGGGTACGTTGATCGACACCGAACGTGCGACAA
142_chr15:23500000-23550000_Seq_238_5242-5271	GCGTCGTTATGGTGCAACGTGACTTTGTGGGTACGTTGATatgaattcttattggactgatgtaaacaacGACTTTGTGGGTACGTTGATGACTTTGTGGGTACGTTGATCGACACCGAACGTGCGACAA
145_chr15:23500000-23550000_Seq_248_5475-5504	GCGTCGTTATGGTGCAACGTGACTTTGTGGGTACGTTGATgattagttcaattttctactagttcaatccGACTTTGTGGGTACGTTGATGACTTTGTGGGTACGTTGATCGACACCGAACGTGCGACAA
148_chr15:23500000-23550000_Seq_252_5555-5584	GCGTCGTTATGGTGCAACGTGACTTTGTGGGTACGTTGATatgaatctggtgcatttttctgttatcacaGACTTTGTGGGTACGTTGATGACTTTGTGGGTACGTTGATCGACACCGAACGTGCGACAA
151_chr15:23500000-23550000_Seq_267_5908-5937	GCGTCGTTATGGTGCAACGTGACTTTGTGGGTACGTTGATtcttggctcactgcgatctccatctcctggGACTTTGTGGGTACGTTGATGACTTTGTGGGTACGTTGATCGACACCGAACGTGCGACAA
154_chr15:23500000-23550000_Seq_280_6172-6201	GCGTCGTTATGGTGCAACGTGACTTTGTGGGTACGTTGATtaacctgaggatgattaaatatcattttggGACTTTGTGGGTACGTTGATGACTTTGTGGGTACGTTGATCGACACCGAACGTGCGACAA
157_chr15:23500000-23550000_Seq_286_6292-6321	GCGTCGTTATGGTGCAACGTGACTTTGTGGGTACGTTGATtcaggaaagacaactttgaagtttgatttgGACTTTGTGGGTACGTTGATGACTTTGTGGGTACGTTGATCGACACCGAACGTGCGACAA
160_chr15:23500000-23550000_Seq_294_6508-6537	GCGTCGTTATGGTGCAACGTGACTTTGTGGGTACGTTGATtgcattagcctactattagtgttaaccccaGACTTTGTGGGTACGTTGATGACTTTGTGGGTACGTTGATCGACACCGAACGTGCGACAA
163_chr15:23500000-23550000_Seq_304_6748-6777	GCGTCGTTATGGTGCAACGTGACTTTGTGGGTACGTTGATctttgcaaggttaattgttacaatttttccGACTTTGTGGGTACGTTGATGACTTTGTGGGTACGTTGATCGACACCGAACGTGCGACAA
166_chr15:23500000-23550000_Seq_310_6875-6904	GCGTCGTTATGGTGCAACGTGACTTTGTGGGTACGTTGATttatctcatttaagataaggtagacctttgGACTTTGTGGGTACGTTGATGACTTTGTGGGTACGTTGATCGACACCGAACGTGCGACAA
169_chr15:23500000-23550000_Seq_317_7029-7058	GCGTCGTTATGGTGCAACGTGACTTTGTGGGTACGTTGATacatggaaatctattgtcaatagtctcaatGACTTTGTGGGTACGTTGATGACTTTGTGGGTACGTTGATCGACACCGAACGTGCGACAA
171_chr15:23500000-23550000_Seq_328_7288-7317	GCGTCGTTATGGTGCAACGTGACTTTGTGGGTACGTTGATtatgacctgaataatgtagaccatctatttGACTTTGTGGGTACGTTGATGACTTTGTGGGTACGTTGATCGACACCGAACGTGCGACAA
174_chr15:23500000-23550000_Seq_332_7392-7421	GCGTCGTTATGGTGCAACGTGACTTTGTGGGTACGTTGATaccaagaggcattacagctcttcattttccGACTTTGTGGGTACGTTGATGACTTTGTGGGTACGTTGATCGACACCGAACGTGCGACAA
177_chr15:23500000-23550000_Seq_337_7517-7546	GCGTCGTTATGGTGCAACGTGACTTTGTGGGTACGTTGATcagacagaagaagatccagcaactcagagtGACTTTGTGGGTACGTTGATGACTTTGTGGGTACGTTGATCGACACCGAACGTGCGACAA
180_chr15:23500000-23550000_Seq_341_7597-7626	GCGTCGTTATGGTGCAACGTGACTTTGTGGGTACGTTGATcaaacaggcatgactgaaagacaaaaacagGACTTTGTGGGTACGTTGATGACTTTGTGGGTACGTTGATCGACACCGAACGTGCGACAA
183_chr15:23500000-23550000_Seq_345_7680-7709	GCGTCGTTATGGTGCAACGTGACTTTGTGGGTACGTTGATgagatttttctcaaagtgggatctgtagtcGACTTTGTGGGTACGTTGATGACTTTGTGGGTACGTTGATCGACACCGAACGTGCGACAA
186_chr15:23500000-23550000_Seq_348_7740-7769	GCGTCGTTATGGTGCAACGTGACTTTGTGGGTACGTTGATcaccagaagtcatcctagggcctttgatacGACTTTGTGGGTACGTTGATGACTTTGTGGGTACGTTGATCGACACCGAACGTGCGACAA
189_chr15:23500000-23550000_Seq_369_8232-8261	GCGTCGTTATGGTGCAACGTGACTTTGTGGGTACGTTGATtgtagcttggattccactttcaattacactGACTTTGTGGGTACGTTGATGACTTTGTGGGTACGTTGATCGACACCGAACGTGCGACAA
192_chr15:23500000-23550000_Seq_372_8295-8324	GCGTCGTTATGGTGCAACGTGACTTTGTGGGTACGTTGATcagaactttatagagaatataaagtgatccGACTTTGTGGGTACGTTGATGACTTTGTGGGTACGTTGATCGACACCGAACGTGCGACAA
195_chr15:23500000-23550000_Seq_378_8415-8444	GCGTCGTTATGGTGCAACGTGACTTTGTGGGTACGTTGATaagcaaggacagattttaaatagactgtagGACTTTGTGGGTACGTTGATGACTTTGTGGGTACGTTGATCGACACCGAACGTGCGACAA
198_chr15:23500000-23550000_Seq_384_8535-8564	GCGTCGTTATGGTGCAACGTGACTTTGTGGGTACGTTGATaaacaagttattttcccatggttaacttagGACTTTGTGGGTACGTTGATGACTTTGTGGGTACGTTGATCGACACCGAACGTGCGACAA
201_chr15:23500000-23550000_Seq_389_8635-8664	GCGTCGTTATGGTGCAACGTGACTTTGTGGGTACGTTGATctgacttaggtaaatgatggctgttgagctGACTTTGTGGGTACGTTGATGACTTTGTGGGTACGTTGATCGACACCGAACGTGCGACAA
204_chr15:23500000-23550000_Seq_397_8795-8824	GCGTCGTTATGGTGCAACGTGACTTTGTGGGTACGTTGATctgagcctcaatttcccaggtcagagggtgGACTTTGTGGGTACGTTGATGACTTTGTGGGTACGTTGATCGACACCGAACGTGCGACAA
207_chr15:23500000-23550000_Seq_406_8978-9007	GCGTCGTTATGGTGCAACGTGACTTTGTGGGTACGTTGATaatcttttcctcaccaggtgctgtggtcccGACTTTGTGGGTACGTTGATGACTTTGTGGGTACGTTGATCGACACCGAACGTGCGACAA
210_chr15:23500000-23550000_Seq_416_9178-9207	GCGTCGTTATGGTGCAACGTGACTTTGTGGGTACGTTGATaacgtgggagtgagaaaaattaaatagattGACTTTGTGGGTACGTTGATGACTTTGTGGGTACGTTGATCGACACCGAACGTGCGACAA
213_chr15:23500000-23550000_Seq_422_9298-9327	GCGTCGTTATGGTGCAACGTGACTTTGTGGGTACGTTGATgtgtttcactaagttctctctcagtctttcGACTTTGTGGGTACGTTGATGACTTTGTGGGTACGTTGATCGACACCGAACGTGCGACAA
216_chr15:23500000-23550000_Seq_428_9442-9471	GCGTCGTTATGGTGCAACGTGACTTTGTGGGTACGTTGATttttcttttccatgcaactatgggattgctGACTTTGTGGGTACGTTGATGACTTTGTGGGTACGTTGATCGACACCGAACGTGCGACAA
219_chr15:23500000-23550000_Seq_434_9574-9603	GCGTCGTTATGGTGCAACGTGACTTTGTGGGTACGTTGATtttttgactggctataggggacatgctattGACTTTGTGGGTACGTTGATGACTTTGTGGGTACGTTGATCGACACCGAACGTGCGACAA
222_chr15:23500000-23550000_Seq_439_9674-9703	GCGTCGTTATGGTGCAACGTGACTTTGTGGGTACGTTGATtaacacaacatctcttcatgtaagatcaaaGACTTTGTGGGTACGTTGATGACTTTGTGGGTACGTTGATCGACACCGAACGTGCGACAA
225_chr15:23500000-23550000_Seq_448_9879-9908	GCGTCGTTATGGTGCAACGTGACTTTGTGGGTACGTTGATtcagagtgaacttcagggtctgagagttaaGACTTTGTGGGTACGTTGATGACTTTGTGGGTACGTTGATCGACACCGAACGTGCGACAA
227_chr15:23500000-23550000_Seq_450_9919-9948	GCGTCGTTATGGTGCAACGTGACTTTGTGGGTACGTTGATagctgcacttgagggaagtgcaggattgaaGACTTTGTGGGTACGTTGATGACTTTGTGGGTACGTTGATCGACACCGAACGTGCGACAA
230_chr15:23500000-23550000_Seq_453_10011-10040	GCGTCGTTATGGTGCAACGTGACTTTGTGGGTACGTTGATtttttggagtgacccagggtagagagaaagGACTTTGTGGGTACGTTGATGACTTTGTGGGTACGTTGATCGACACCGAACGTGCGACAA
233_chr15:23500000-23550000_Seq_456_10071-10100	GCGTCGTTATGGTGCAACGTGACTTTGTGGGTACGTTGATtcccatcttctgggtcccagtgaccgtcacGACTTTGTGGGTACGTTGATGACTTTGTGGGTACGTTGATCGACACCGAACGTGCGACAA
236_chr15:23500000-23550000_Seq_461_10171-10200	GCGTCGTTATGGTGCAACGTGACTTTGTGGGTACGTTGATacacttaactgttcatagccctagtcttccGACTTTGTGGGTACGTTGATGACTTTGTGGGTACGTTGATCGACACCGAACGTGCGACAA
239_chr15:23500000-23550000_Seq_464_10231-10260	GCGTCGTTATGGTGCAACGTGACTTTGTGGGTACGTTGATtgcatgaccagtatggccactaggtcccccGACTTTGTGGGTACGTTGATGACTTTGTGGGTACGTTGATCGACACCGAACGTGCGACAA
242_chr15:23500000-23550000_Seq_467_10291-10320	GCGTCGTTATGGTGCAACGTGACTTTGTGGGTACGTTGATgggaaaaactgcataatagttgttgctgggGACTTTGTGGGTACGTTGATGACTTTGTGGGTACGTTGATCGACACCGAACGTGCGACAA
245_chr15:23500000-23550000_Seq_470_10351-10380	GCGTCGTTATGGTGCAACGTGACTTTGTGGGTACGTTGATctctacctctatattccactattatggcccGACTTTGTGGGTACGTTGATGACTTTGTGGGTACGTTGATCGACACCGAACGTGCGACAA
248_chr15:23500000-23550000_Seq_473_10411-10440	GCGTCGTTATGGTGCAACGTGACTTTGTGGGTACGTTGATtccaactgacttccaaacataaaacccctcGACTTTGTGGGTACGTTGATGACTTTGTGGGTACGTTGATCGACACCGAACGTGCGACAA
251_chr15:23500000-23550000_Seq_480_10551-10580	GCGTCGTTATGGTGCAACGTGACTTTGTGGGTACGTTGATtctcaagggtagcttcctccagatattgaaGACTTTGTGGGTACGTTGATGACTTTGTGGGTACGTTGATCGACACCGAACGTGCGACAA
254_chr15:23500000-23550000_Seq_483_10611-10640	GCGTCGTTATGGTGCAACGTGACTTTGTGGGTACGTTGATtggagcctggtacccagtagagggaataggGACTTTGTGGGTACGTTGATGACTTTGTGGGTACGTTGATCGACACCGAACGTGCGACAA
257_chr15:23500000-23550000_Seq_486_10671-10700	GCGTCGTTATGGTGCAACGTGACTTTGTGGGTACGTTGATggccaacgggccaatagggcccccatggagGACTTTGTGGGTACGTTGATGACTTTGTGGGTACGTTGATCGACACCGAACGTGCGACAA
260_chr15:23500000-23550000_Seq_490_10763-10792	GCGTCGTTATGGTGCAACGTGACTTTGTGGGTACGTTGATatgctctccagacaaagcttagagagggaaGACTTTGTGGGTACGTTGATGACTTTGTGGGTACGTTGATCGACACCGAACGTGCGACAA
263_chr15:23500000-23550000_Seq_493_10823-10852	GCGTCGTTATGGTGCAACGTGACTTTGTGGGTACGTTGATatgctcccagcaagataaacaatagtccgtGACTTTGTGGGTACGTTGATGACTTTGTGGGTACGTTGATCGACACCGAACGTGCGACAA
266_chr15:23500000-23550000_Seq_497_10903-10932	GCGTCGTTATGGTGCAACGTGACTTTGTGGGTACGTTGATgaaaaagaaacagcttaaatggatcggggtGACTTTGTGGGTACGTTGATGACTTTGTGGGTACGTTGATCGACACCGAACGTGCGACAA
269_chr15:23500000-23550000_Seq_500_10975-11004	GCGTCGTTATGGTGCAACGTGACTTTGTGGGTACGTTGATcccagtgagtgctattattgggaaataaatGACTTTGTGGGTACGTTGATGACTTTGTGGGTACGTTGATCGACACCGAACGTGCGACAA
272_chr15:23500000-23550000_Seq_503_11053-11082	GCGTCGTTATGGTGCAACGTGACTTTGTGGGTACGTTGATttttaattacattcttgattactcaggcacGACTTTGTGGGTACGTTGATGACTTTGTGGGTACGTTGATCGACACCGAACGTGCGACAA
275_chr15:23500000-23550000_Seq_510_11198-11227	GCGTCGTTATGGTGCAACGTGACTTTGTGGGTACGTTGATtataacagtctggaggtcctgttgtcaacaGACTTTGTGGGTACGTTGATGACTTTGTGGGTACGTTGATCGACACCGAACGTGCGACAA
278_chr15:23500000-23550000_Seq_516_11318-11347	GCGTCGTTATGGTGCAACGTGACTTTGTGGGTACGTTGATgacctccttgcagccccacacgataaccagGACTTTGTGGGTACGTTGATGACTTTGTGGGTACGTTGATCGACACCGAACGTGCGACAA
281_chr15:23500000-23550000_Seq_521_11418-11447	GCGTCGTTATGGTGCAACGTGACTTTGTGGGTACGTTGATtgcctgaattttaaggctggcagccacactGACTTTGTGGGTACGTTGATGACTTTGTGGGTACGTTGATCGACACCGAACGTGCGACAA
284_chr15:23500000-23550000_Seq_524_11534-11563	GCGTCGTTATGGTGCAACGTGACTTTGTGGGTACGTTGATcctggaaataaaactagagttatggttctgGACTTTGTGGGTACGTTGATGACTTTGTGGGTACGTTGATCGACACCGAACGTGCGACAA
286_chr15:23500000-23550000_Seq_526_11574-11603	GCGTCGTTATGGTGCAACGTGACTTTGTGGGTACGTTGATccctttcgatagatccGAGATGAGCCCCCAGACTTTGTGGGTACGTTGATGACTTTGTGGGTACGTTGATCGACACCGAACGTGCGACAA
289_chr15:23500000-23550000_Seq_529_11634-11663	GCGTCGTTATGGTGCAACGTGACTTTGTGGGTACGTTGATgttgtctaaagtgttgtctgagctcattgtGACTTTGTGGGTACGTTGATGACTTTGTGGGTACGTTGATCGACACCGAACGTGCGACAA
292_chr15:23500000-23550000_Seq_532_11695-11724	GCGTCGTTATGGTGCAACGTGACTTTGTGGGTACGTTGATgcaaaagatgaggttggaatgaaagaggaaGACTTTGTGGGTACGTTGATGACTTTGTGGGTACGTTGATCGACACCGAACGTGCGACAA
295_chr15:23500000-23550000_Seq_539_11845-11874	GCGTCGTTATGGTGCAACGTGACTTTGTGGGTACGTTGATaagctgtctgcacaactcccctgtgcaggaGACTTTGTGGGTACGTTGATGACTTTGTGGGTACGTTGATCGACACCGAACGTGCGACAA
298_chr15:23500000-23550000_Seq_546_11997-12026	GCGTCGTTATGGTGCAACGTGACTTTGTGGGTACGTTGATtttttccttttgttctccctcactgttataGACTTTGTGGGTACGTTGATGACTTTGTGGGTACGTTGATCGACACCGAACGTGCGACAA
301_chr15:23500000-23550000_Seq_551_12122-12151	GCGTCGTTATGGTGCAACGTGACTTTGTGGGTACGTTGATgtgaccttcttgctacataacatgacagaaGACTTTGTGGGTACGTTGATGACTTTGTGGGTACGTTGATCGACACCGAACGTGCGACAA
304_chr15:23500000-23550000_Seq_555_12211-12240	GCGTCGTTATGGTGCAACGTGACTTTGTGGGTACGTTGATtaatttgcattaatatattcatggtggtggGACTTTGTGGGTACGTTGATGACTTTGTGGGTACGTTGATCGACACCGAACGTGCGACAA
307_chr15:23500000-23550000_Seq_559_12291-12320	GCGTCGTTATGGTGCAACGTGACTTTGTGGGTACGTTGATccaacacatgcttttggggaacacattcaaGACTTTGTGGGTACGTTGATGACTTTGTGGGTACGTTGATCGACACCGAACGTGCGACAA
310_chr15:23500000-23550000_Seq_562_12369-12398	GCGTCGTTATGGTGCAACGTGACTTTGTGGGTACGTTGATatataatatattcattccacccaataacccGACTTTGTGGGTACGTTGATGACTTTGTGGGTACGTTGATCGACACCGAACGTGCGACAA
313_chr15:23500000-23550000_Seq_568_12489-12518	GCGTCGTTATGGTGCAACGTGACTTTGTGGGTACGTTGATcaccttgaagcaaattcccctctagctactGACTTTGTGGGTACGTTGATGACTTTGTGGGTACGTTGATCGACACCGAACGTGCGACAA
316_chr15:23500000-23550000_Seq_572_12569-12598	GCGTCGTTATGGTGCAACGTGACTTTGTGGGTACGTTGATcaggcatggggcatacatgtccattccaaaGACTTTGTGGGTACGTTGATGACTTTGTGGGTACGTTGATCGACACCGAACGTGCGACAA
319_chr15:23500000-23550000_Seq_577_12677-12706	GCGTCGTTATGGTGCAACGTGACTTTGTGGGTACGTTGATaaacttcaaaataactttttactccatgggGACTTTGTGGGTACGTTGATGACTTTGTGGGTACGTTGATCGACACCGAACGTGCGACAA
322_chr15:23500000-23550000_Seq_580_12737-12766	GCGTCGTTATGGTGCAACGTGACTTTGTGGGTACGTTGATgcctgcaatgttttcagcaacctcagccccGACTTTGTGGGTACGTTGATGACTTTGTGGGTACGTTGATCGACACCGAACGTGCGACAA
325_chr15:23500000-23550000_Seq_583_12797-12826	GCGTCGTTATGGTGCAACGTGACTTTGTGGGTACGTTGATgctatctaaggttgaagtctcatTCtgttaGACTTTGTGGGTACGTTGATGACTTTGTGGGTACGTTGATCGACACCGAACGTGCGACAA
328_chr15:23500000-23550000_Seq_586_12857-12886	GCGTCGTTATGGTGCAACGTGACTTTGTGGGTACGTTGATatggaagttaacacggggccaagcagatttGACTTTGTGGGTACGTTGATGACTTTGTGGGTACGTTGATCGACACCGAACGTGCGACAA
331_chr15:23500000-23550000_Seq_590_12937-12966	GCGTCGTTATGGTGCAACGTGACTTTGTGGGTACGTTGATgcagaggcacaaggaccttctggatggcccGACTTTGTGGGTACGTTGATGACTTTGTGGGTACGTTGATCGACACCGAACGTGCGACAA
334_chr15:23500000-23550000_Seq_593_13029-13058	GCGTCGTTATGGTGCAACGTGACTTTGTGGGTACGTTGATtgcggtgggtatttcttccccttgtatacaGACTTTGTGGGTACGTTGATGACTTTGTGGGTACGTTGATCGACACCGAACGTGCGACAA
337_chr15:23500000-23550000_Seq_597_13109-13138	GCGTCGTTATGGTGCAACGTGACTTTGTGGGTACGTTGATttgtgatggctatcttaagtaatggtccacGACTTTGTGGGTACGTTGATGACTTTGTGGGTACGTTGATCGACACCGAACGTGCGACAA
340_chr15:23500000-23550000_Seq_602_13209-13238	GCGTCGTTATGGTGCAACGTGACTTTGTGGGTACGTTGATccacaatcttggctatttcctaaggcatgtGACTTTGTGGGTACGTTGATGACTTTGTGGGTACGTTGATCGACACCGAACGTGCGACAA
342_chr15:23500000-23550000_Seq_604_13249-13278	GCGTCGTTATGGTGCAACGTGACTTTGTGGGTACGTTGATctttgagtcaaaggactattagtgggtatgGACTTTGTGGGTACGTTGATGACTTTGTGGGTACGTTGATCGACACCGAACGTGCGACAA
345_chr15:23500000-23550000_Seq_611_13398-13427	GCGTCGTTATGGTGCAACGTGACTTTGTGGGTACGTTGATttttatcctccttatttttagagacaaaggGACTTTGTGGGTACGTTGATGACTTTGTGGGTACGTTGATCGACACCGAACGTGCGACAA
348_chr15:23500000-23550000_Seq_614_13458-13487	GCGTCGTTATGGTGCAACGTGACTTTGTGGGTACGTTGATccactagccagggacatcatccctgcctaaGACTTTGTGGGTACGTTGATGACTTTGTGGGTACGTTGATCGACACCGAACGTGCGACAA
351_chr15:23500000-23550000_Seq_617_13542-13571	GCGTCGTTATGGTGCAACGTGACTTTGTGGGTACGTTGATtagctcctccccgtaggatattagggtttgGACTTTGTGGGTACGTTGATGACTTTGTGGGTACGTTGATCGACACCGAACGTGCGACAA
354_chr15:23500000-23550000_Seq_634_13925-13954	GCGTCGTTATGGTGCAACGTGACTTTGTGGGTACGTTGATaaatcagtggcattctggcacattattctcGACTTTGTGGGTACGTTGATGACTTTGTGGGTACGTTGATCGACACCGAACGTGCGACAA
357_chr15:23500000-23550000_Seq_638_14050-14079	GCGTCGTTATGGTGCAACGTGACTTTGTGGGTACGTTGATtttttaaatgttagtgtggagacctgtagcGACTTTGTGGGTACGTTGATGACTTTGTGGGTACGTTGATCGACACCGAACGTGCGACAA
360_chr15:23500000-23550000_Seq_647_14259-14288	GCGTCGTTATGGTGCAACGTGACTTTGTGGGTACGTTGATtaagtttcagtgttattatgcatgaccttaGACTTTGTGGGTACGTTGATGACTTTGTGGGTACGTTGATCGACACCGAACGTGCGACAA
363_chr15:23500000-23550000_Seq_650_14323-14352	GCGTCGTTATGGTGCAACGTGACTTTGTGGGTACGTTGATttatgggttctcttcttacttggcttttctGACTTTGTGGGTACGTTGATGACTTTGTGGGTACGTTGATCGACACCGAACGTGCGACAA
366_chr15:23500000-23550000_Seq_656_14443-14472	GCGTCGTTATGGTGCAACGTGACTTTGTGGGTACGTTGATaattgggtaaattcttctgctctcaacgccGACTTTGTGGGTACGTTGATGACTTTGTGGGTACGTTGATCGACACCGAACGTGCGACAA
369_chr15:23500000-23550000_Seq_661_14543-14572	GCGTCGTTATGGTGCAACGTGACTTTGTGGGTACGTTGATctacaggactacataggcaaggcatgaggcGACTTTGTGGGTACGTTGATGACTTTGTGGGTACGTTGATCGACACCGAACGTGCGACAA
372_chr15:23500000-23550000_Seq_665_14633-14662	GCGTCGTTATGGTGCAACGTGACTTTGTGGGTACGTTGATttgAAAGCAGGCTACTCcagtttacagatgGACTTTGTGGGTACGTTGATGACTTTGTGGGTACGTTGATCGACACCGAACGTGCGACAA
375_chr15:23500000-23550000_Seq_671_14753-14782	GCGTCGTTATGGTGCAACGTGACTTTGTGGGTACGTTGATatgaatagtctactctttctttagcatgtaGACTTTGTGGGTACGTTGATGACTTTGTGGGTACGTTGATCGACACCGAACGTGCGACAA
378_chr15:23500000-23550000_Seq_675_14858-14887	GCGTCGTTATGGTGCAACGTGACTTTGTGGGTACGTTGATgttgtggtggctggcacctgtaaacccagcGACTTTGTGGGTACGTTGATGACTTTGTGGGTACGTTGATCGACACCGAACGTGCGACAA
381_chr15:23500000-23550000_Seq_684_15137-15166	GCGTCGTTATGGTGCAACGTGACTTTGTGGGTACGTTGATtaaataagatcacagatcattcatttagccGACTTTGTGGGTACGTTGATGACTTTGTGGGTACGTTGATCGACACCGAACGTGCGACAA
384_chr15:23500000-23550000_Seq_689_15273-15302	GCGTCGTTATGGTGCAACGTGACTTTGTGGGTACGTTGATttttccccttttcttctgcagtttactctaGACTTTGTGGGTACGTTGATGACTTTGTGGGTACGTTGATCGACACCGAACGTGCGACAA
387_chr15:23500000-23550000_Seq_698_15574-15603	GCGTCGTTATGGTGCAACGTGACTTTGTGGGTACGTTGATtacacaggacttcgcttctaagatcaatatGACTTTGTGGGTACGTTGATGACTTTGTGGGTACGTTGATCGACACCGAACGTGCGACAA
390_chr15:23500000-23550000_Seq_711_15883-15912	GCGTCGTTATGGTGCAACGTGACTTTGTGGGTACGTTGATaagtgctgggtttatagcataagccaccatGACTTTGTGGGTACGTTGATGACTTTGTGGGTACGTTGATCGACACCGAACGTGCGACAA
393_chr15:23500000-23550000_Seq_714_15964-15993	GCGTCGTTATGGTGCAACGTGACTTTGTGGGTACGTTGATttaggtctggggcacatatgcaggtttgtgGACTTTGTGGGTACGTTGATGACTTTGTGGGTACGTTGATCGACACCGAACGTGCGACAA
396_chr15:23500000-23550000_Seq_724_16191-16220	GCGTCGTTATGGTGCAACGTGACTTTGTGGGTACGTTGATaaatctccaaactagacaatattcattctcGACTTTGTGGGTACGTTGATGACTTTGTGGGTACGTTGATCGACACCGAACGTGCGACAA
398_chr15:23500000-23550000_Seq_726_16231-16260	GCGTCGTTATGGTGCAACGTGACTTTGTGGGTACGTTGATcacactcctatgcctctttataatattttaGACTTTGTGGGTACGTTGATGACTTTGTGGGTACGTTGATCGACACCGAACGTGCGACAA
401_chr15:23500000-23550000_Seq_729_16298-16327	GCGTCGTTATGGTGCAACGTGACTTTGTGGGTACGTTGATaggagggaaatcattttaattatacatcggGACTTTGTGGGTACGTTGATGACTTTGTGGGTACGTTGATCGACACCGAACGTGCGACAA
404_chr15:23500000-23550000_Seq_743_16635-16664	GCGTCGTTATGGTGCAACGTGACTTTGTGGGTACGTTGATaaggtattaaagtttccgtttccatttttcGACTTTGTGGGTACGTTGATGACTTTGTGGGTACGTTGATCGACACCGAACGTGCGACAA
407_chr15:23500000-23550000_Seq_746_16779-16808	GCGTCGTTATGGTGCAACGTGACTTTGTGGGTACGTTGATtactttccagtgtttaagtttctattttccGACTTTGTGGGTACGTTGATGACTTTGTGGGTACGTTGATCGACACCGAACGTGCGACAA
410_chr15:23500000-23550000_Seq_753_16963-16992	GCGTCGTTATGGTGCAACGTGACTTTGTGGGTACGTTGATttcagctaagatgtccaggaaagcagacatGACTTTGTGGGTACGTTGATGACTTTGTGGGTACGTTGATCGACACCGAACGTGCGACAA
413_chr15:23500000-23550000_Seq_757_17043-17072	GCGTCGTTATGGTGCAACGTGACTTTGTGGGTACGTTGATtggctttagggcagagcttttcaaggaacaGACTTTGTGGGTACGTTGATGACTTTGTGGGTACGTTGATCGACACCGAACGTGCGACAA
416_chr15:23500000-23550000_Seq_762_17143-17172	GCGTCGTTATGGTGCAACGTGACTTTGTGGGTACGTTGATgaattaaggacgtgatttttacaccaaatcGACTTTGTGGGTACGTTGATGACTTTGTGGGTACGTTGATCGACACCGAACGTGCGACAA
419_chr15:23500000-23550000_Seq_769_17284-17313	GCGTCGTTATGGTGCAACGTGACTTTGTGGGTACGTTGATaacccattctgtaatcagtccattcccccaGACTTTGTGGGTACGTTGATGACTTTGTGGGTACGTTGATCGACACCGAACGTGCGACAA
422_chr15:23500000-23550000_Seq_772_17344-17373	GCGTCGTTATGGTGCAACGTGACTTTGTGGGTACGTTGATgcttttctcacttaaatgtgtgtagaaagaGACTTTGTGGGTACGTTGATGACTTTGTGGGTACGTTGATCGACACCGAACGTGCGACAA
425_chr15:23500000-23550000_Seq_778_17507-17536	GCGTCGTTATGGTGCAACGTGACTTTGTGGGTACGTTGATaaaaagttaagtatcgatgaaaagcagagcGACTTTGTGGGTACGTTGATGACTTTGTGGGTACGTTGATCGACACCGAACGTGCGACAA
428_chr15:23500000-23550000_Seq_783_17607-17636	GCGTCGTTATGGTGCAACGTGACTTTGTGGGTACGTTGATccaaaaacagggcctatggcaccaccactcGACTTTGTGGGTACGTTGATGACTTTGTGGGTACGTTGATCGACACCGAACGTGCGACAA
431_chr15:23500000-23550000_Seq_788_17707-17736	GCGTCGTTATGGTGCAACGTGACTTTGTGGGTACGTTGATgaaaacagacagaaatcaatggagaaattgGACTTTGTGGGTACGTTGATGACTTTGTGGGTACGTTGATCGACACCGAACGTGCGACAA
434_chr15:23500000-23550000_Seq_793_17909-17938	GCGTCGTTATGGTGCAACGTGACTTTGTGGGTACGTTGATaacaaacaaacaaaaaccttttaaatcgccGACTTTGTGGGTACGTTGATGACTTTGTGGGTACGTTGATCGACACCGAACGTGCGACAA
437_chr15:23500000-23550000_Seq_797_17989-18018	GCGTCGTTATGGTGCAACGTGACTTTGTGGGTACGTTGATctgcttcccgcccaggtattctcccaaatgGACTTTGTGGGTACGTTGATGACTTTGTGGGTACGTTGATCGACACCGAACGTGCGACAA
440_chr15:23500000-23550000_Seq_801_18069-18098	GCGTCGTTATGGTGCAACGTGACTTTGTGGGTACGTTGATtttttccaaagaaatggcagtggttcttgcGACTTTGTGGGTACGTTGATGACTTTGTGGGTACGTTGATCGACACCGAACGTGCGACAA
443_chr15:23500000-23550000_Seq_806_18196-18225	GCGTCGTTATGGTGCAACGTGACTTTGTGGGTACGTTGATaagtcctacatgcatcaaagcagaaagaatGACTTTGTGGGTACGTTGATGACTTTGTGGGTACGTTGATCGACACCGAACGTGCGACAA
446_chr15:23500000-23550000_Seq_812_18316-18345	GCGTCGTTATGGTGCAACGTGACTTTGTGGGTACGTTGATtgtctttcccagaaagagttatagcagtcaGACTTTGTGGGTACGTTGATGACTTTGTGGGTACGTTGATCGACACCGAACGTGCGACAA
449_chr15:23500000-23550000_Seq_820_18476-18505	GCGTCGTTATGGTGCAACGTGACTTTGTGGGTACGTTGATcaagaaagagtacctcaatatggttgcaaaGACTTTGTGGGTACGTTGATGACTTTGTGGGTACGTTGATCGACACCGAACGTGCGACAA
452_chr15:23500000-23550000_Seq_830_18676-18705	GCGTCGTTATGGTGCAACGTGACTTTGTGGGTACGTTGATcaacacagaaacacaattgcacagcacaaaGACTTTGTGGGTACGTTGATGACTTTGTGGGTACGTTGATCGACACCGAACGTGCGACAA
454_chr15:23500000-23550000_Seq_837_18852-18881	GCGTCGTTATGGTGCAACGTGACTTTGTGGGTACGTTGATaactcttattgttttgccagcattccaggaGACTTTGTGGGTACGTTGATGACTTTGTGGGTACGTTGATCGACACCGAACGTGCGACAA
457_chr15:23500000-23550000_Seq_840_18912-18941	GCGTCGTTATGGTGCAACGTGACTTTGTGGGTACGTTGATaaaagtagagtggcttttgatgatcctgctGACTTTGTGGGTACGTTGATGACTTTGTGGGTACGTTGATCGACACCGAACGTGCGACAA
460_chr15:23500000-23550000_Seq_846_19046-19075	GCGTCGTTATGGTGCAACGTGACTTTGTGGGTACGTTGATacacaaaaggaaaagcagatcaggatgtcaGACTTTGTGGGTACGTTGATGACTTTGTGGGTACGTTGATCGACACCGAACGTGCGACAA
463_chr15:23500000-23550000_Seq_849_19106-19135	GCGTCGTTATGGTGCAACGTGACTTTGTGGGTACGTTGATACGTTCTCTCctcacaaagacagcacagagGACTTTGTGGGTACGTTGATGACTTTGTGGGTACGTTGATCGACACCGAACGTGCGACAA
466_chr15:23500000-23550000_Seq_852_19166-19195	GCGTCGTTATGGTGCAACGTGACTTTGTGGGTACGTTGATtgacagaacaacccatagacttcccttctcGACTTTGTGGGTACGTTGATGACTTTGTGGGTACGTTGATCGACACCGAACGTGCGACAA
469_chr15:23500000-23550000_Seq_855_19228-19257	GCGTCGTTATGGTGCAACGTGACTTTGTGGGTACGTTGATagaagacttaagaagattacaaagttcaagGACTTTGTGGGTACGTTGATGACTTTGTGGGTACGTTGATCGACACCGAACGTGCGACAA
472_chr15:23500000-23550000_Seq_860_19328-19357	GCGTCGTTATGGTGCAACGTGACTTTGTGGGTACGTTGATattaagactgagccaaccgactgtttcagcGACTTTGTGGGTACGTTGATGACTTTGTGGGTACGTTGATCGACACCGAACGTGCGACAA
475_chr15:23500000-23550000_Seq_863_19388-19417	GCGTCGTTATGGTGCAACGTGACTTTGTGGGTACGTTGATgccgatgaagttaacgaaaagcaaagaagaGACTTTGTGGGTACGTTGATGACTTTGTGGGTACGTTGATCGACACCGAACGTGCGACAA
478_chr15:23500000-23550000_Seq_867_19468-19497	GCGTCGTTATGGTGCAACGTGACTTTGTGGGTACGTTGATggggagggaaagtgttgtctgcaaggttggGACTTTGTGGGTACGTTGATGACTTTGTGGGTACGTTGATCGACACCGAACGTGCGACAA
481_chr15:23500000-23550000_Seq_871_19548-19577	GCGTCGTTATGGTGCAACGTGACTTTGTGGGTACGTTGATgaatcaaagatccaggcagccgctcttcagGACTTTGTGGGTACGTTGATGACTTTGTGGGTACGTTGATCGACACCGAACGTGCGACAA
484_chr15:23500000-23550000_Seq_874_19608-19637	GCGTCGTTATGGTGCAACGTGACTTTGTGGGTACGTTGATtggctcatgaacctccctctccagggaggaGACTTTGTGGGTACGTTGATGACTTTGTGGGTACGTTGATCGACACCGAACGTGCGACAA
487_chr15:23500000-23550000_Seq_878_19688-19717	GCGTCGTTATGGTGCAACGTGACTTTGTGGGTACGTTGATCAGACCCatataatggaaattaacatggggGACTTTGTGGGTACGTTGATGACTTTGTGGGTACGTTGATCGACACCGAACGTGCGACAA
490_chr15:23500000-23550000_Seq_882_19768-19797	GCGTCGTTATGGTGCAACGTGACTTTGTGGGTACGTTGATgcaagggagacagtggaggtgcaaggattcGACTTTGTGGGTACGTTGATGACTTTGTGGGTACGTTGATCGACACCGAACGTGCGACAA
493_chr15:23500000-23550000_Seq_885_19828-19857	GCGTCGTTATGGTGCAACGTGACTTTGTGGGTACGTTGATagaatttttagtaggcaaagcatgggaattGACTTTGTGGGTACGTTGATGACTTTGTGGGTACGTTGATCGACACCGAACGTGCGACAA
496_chr15:23500000-23550000_Seq_897_20068-20097	GCGTCGTTATGGTGCAACGTGACTTTGTGGGTACGTTGATggccagttcctggaatgaagtaaaaggactGACTTTGTGGGTACGTTGATGACTTTGTGGGTACGTTGATCGACACCGAACGTGCGACAA
499_chr15:23500000-23550000_Seq_904_20208-20237	GCGTCGTTATGGTGCAACGTGACTTTGTGGGTACGTTGATtgtctcaATTcctgtgtctcttccaggttgGACTTTGTGGGTACGTTGATGACTTTGTGGGTACGTTGATCGACACCGAACGTGCGACAA
502_chr15:23500000-23550000_Seq_907_20268-20297	GCGTCGTTATGGTGCAACGTGACTTTGTGGGTACGTTGATgggtctcagtggcaccccaacccctgtggcGACTTTGTGGGTACGTTGATGACTTTGTGGGTACGTTGATCGACACCGAACGTGCGACAA
505_chr15:23500000-23550000_Seq_910_20328-20357	GCGTCGTTATGGTGCAACGTGACTTTGTGGGTACGTTGATctgtggtggctttgccccatgtttctgcccGACTTTGTGGGTACGTTGATGACTTTGTGGGTACGTTGATCGACACCGAACGTGCGACAA
508_chr15:23500000-23550000_Seq_913_20388-20417	GCGTCGTTATGGTGCAACGTGACTTTGTGGGTACGTTGATaCTGGTCaagcaaagtgtggcatggtttttGACTTTGTGGGTACGTTGATGACTTTGTGGGTACGTTGATCGACACCGAACGTGCGACAA
511_chr15:23500000-23550000_Seq_916_20471-20500	GCGTCGTTATGGTGCAACGTGACTTTGTGGGTACGTTGATgaatttataattcaaatggaatcagaacggGACTTTGTGGGTACGTTGATGACTTTGTGGGTACGTTGATCGACACCGAACGTGCGACAA
513_chr15:23500000-23550000_Seq_918_20511-20540	GCGTCGTTATGGTGCAACGTGACTTTGTGGGTACGTTGATaaaaccctaagcttggccatgtaaagaataGACTTTGTGGGTACGTTGATGACTTTGTGGGTACGTTGATCGACACCGAACGTGCGACAA
516_chr15:23500000-23550000_Seq_921_20571-20600	GCGTCGTTATGGTGCAACGTGACTTTGTGGGTACGTTGATgtgtggcaaagtgaccattttctaaagagaGACTTTGTGGGTACGTTGATGACTTTGTGGGTACGTTGATCGACACCGAACGTGCGACAA
519_chr15:23500000-23550000_Seq_924_20635-20664	GCGTCGTTATGGTGCAACGTGACTTTGTGGGTACGTTGATtcaagcaattggaaaatgaacttgaaggtaGACTTTGTGGGTACGTTGATGACTTTGTGGGTACGTTGATCGACACCGAACGTGCGACAA
522_chr15:23500000-23550000_Seq_927_20695-20724	GCGTCGTTATGGTGCAACGTGACTTTGTGGGTACGTTGATCCTGGAGGCTACCAGGGAGCCACAGCTCTTGACTTTGTGGGTACGTTGATGACTTTGTGGGTACGTTGATCGACACCGAACGTGCGACAA
525_chr15:23500000-23550000_Seq_939_20935-20964	GCGTCGTTATGGTGCAACGTGACTTTGTGGGTACGTTGATgtttactgcttctactttcggaagcagtaaGACTTTGTGGGTACGTTGATGACTTTGTGGGTACGTTGATCGACACCGAACGTGCGACAA
528_chr15:23500000-23550000_Seq_942_20995-21024	GCGTCGTTATGGTGCAACGTGACTTTGTGGGTACGTTGATaggctggggtgaccaaagagtgctgccccaGACTTTGTGGGTACGTTGATGACTTTGTGGGTACGTTGATCGACACCGAACGTGCGACAA
531_chr15:23500000-23550000_Seq_945_21055-21084	GCGTCGTTATGGTGCAACGTGACTTTGTGGGTACGTTGATcggggtagcCAGTTCTGAGATCTTGTATATGACTTTGTGGGTACGTTGATGACTTTGTGGGTACGTTGATCGACACCGAACGTGCGACAA
534_chr15:23500000-23550000_Seq_948_21115-21144	GCGTCGTTATGGTGCAACGTGACTTTGTGGGTACGTTGATCCTACCTTgccagaaatcctattgctctaaGACTTTGTGGGTACGTTGATGACTTTGTGGGTACGTTGATCGACACCGAACGTGCGACAA
537_chr15:23500000-23550000_Seq_951_21175-21204	GCGTCGTTATGGTGCAACGTGACTTTGTGGGTACGTTGATgaacaaaattatgacaagttctttgcaaccGACTTTGTGGGTACGTTGATGACTTTGTGGGTACGTTGATCGACACCGAACGTGCGACAA
540_chr15:23500000-23550000_Seq_955_21255-21284	GCGTCGTTATGGTGCAACGTGACTTTGTGGGTACGTTGATttccatctagtattttgtcagaatagctttGACTTTGTGGGTACGTTGATGACTTTGTGGGTACGTTGATCGACACCGAACGTGCGACAA
543_chr15:23500000-23550000_Seq_958_21317-21346	GCGTCGTTATGGTGCAACGTGACTTTGTGGGTACGTTGATttaccacttaagtgatacctaagaaattctGACTTTGTGGGTACGTTGATGACTTTGTGGGTACGTTGATCGACACCGAACGTGCGACAA
546_chr15:23500000-23550000_Seq_968_21541-21570	GCGTCGTTATGGTGCAACGTGACTTTGTGGGTACGTTGATggagaatccctggaacctgggaggcagcggGACTTTGTGGGTACGTTGATGACTTTGTGGGTACGTTGATCGACACCGAACGTGCGACAA
549_chr15:23500000-23550000_Seq_974_21697-21726	GCGTCGTTATGGTGCAACGTGACTTTGTGGGTACGTTGATcctcaacagaatgggtccctaatgctctgtGACTTTGTGGGTACGTTGATGACTTTGTGGGTACGTTGATCGACACCGAACGTGCGACAA
552_chr15:23500000-23550000_Seq_980_21817-21846	GCGTCGTTATGGTGCAACGTGACTTTGTGGGTACGTTGATaggtgtttgttatatcaacactcccatttaGACTTTGTGGGTACGTTGATGACTTTGTGGGTACGTTGATCGACACCGAACGTGCGACAA
555_chr15:23500000-23550000_Seq_984_21923-21952	GCGTCGTTATGGTGCAACGTGACTTTGTGGGTACGTTGATttgaaatttgtttgattcatagttctggagGACTTTGTGGGTACGTTGATGACTTTGTGGGTACGTTGATCGACACCGAACGTGCGACAA
558_chr15:23500000-23550000_Seq_988_22003-22032	GCGTCGTTATGGTGCAACGTGACTTTGTGGGTACGTTGATataacataaagaaaggtatcacatggtgagGACTTTGTGGGTACGTTGATGACTTTGTGGGTACGTTGATCGACACCGAACGTGCGACAA
561_chr15:23500000-23550000_Seq_991_22063-22092	GCGTCGTTATGGTGCAACGTGACTTTGTGGGTACGTTGATtataatccacattaacccattcataagggtGACTTTGTGGGTACGTTGATGACTTTGTGGGTACGTTGATCGACACCGAACGTGCGACAA
564_chr15:23500000-23550000_Seq_995_22143-22172	GCGTCGTTATGGTGCAACGTGACTTTGTGGGTACGTTGATtttgcatttagaattaagcttccttcacatGACTTTGTGGGTACGTTGATGACTTTGTGGGTACGTTGATCGACACCGAACGTGCGACAA
567_chr15:23500000-23550000_Seq_998_22236-22265	GCGTCGTTATGGTGCAACGTGACTTTGTGGGTACGTTGATTCTTTGCCAAACACAGGCTGTGACCAGAAAGACTTTGTGGGTACGTTGATGACTTTGTGGGTACGTTGATCGACACCGAACGTGCGACAA
569_chr15:23500000-23550000_Seq_1000_22276-22305	GCGTCGTTATGGTGCAACGTGACTTTGTGGGTACGTTGATTGCCCAGCCCTGGAAACTGTGGCTTCAGTGGACTTTGTGGGTACGTTGATGACTTTGTGGGTACGTTGATCGACACCGAACGTGCGACAA
572_chr15:23500000-23550000_Seq_1015_22625-22654	GCGTCGTTATGGTGCAACGTGACTTTGTGGGTACGTTGATagggtgcgtcaccaactgagccggtatctaGACTTTGTGGGTACGTTGATGACTTTGTGGGTACGTTGATCGACACCGAACGTGCGACAA
575_chr15:23500000-23550000_Seq_1018_22710-22739	GCGTCGTTATGGTGCAACGTGACTTTGTGGGTACGTTGATaaacttgggcaaagaacaatgtggcaaacaGACTTTGTGGGTACGTTGATGACTTTGTGGGTACGTTGATCGACACCGAACGTGCGACAA
578_chr15:23500000-23550000_Seq_1021_22770-22799	GCGTCGTTATGGTGCAACGTGACTTTGTGGGTACGTTGATaaagcacaagcttgccataggtggaagttcGACTTTGTGGGTACGTTGATGACTTTGTGGGTACGTTGATCGACACCGAACGTGCGACAA
581_chr15:23500000-23550000_Seq_1024_22830-22859	GCGTCGTTATGGTGCAACGTGACTTTGTGGGTACGTTGATattgattcacaagccaagtgaagtccctccGACTTTGTGGGTACGTTGATGACTTTGTGGGTACGTTGATCGACACCGAACGTGCGACAA
584_chr15:23500000-23550000_Seq_1027_22890-22919	GCGTCGTTATGGTGCAACGTGACTTTGTGGGTACGTTGATccaTCCTGTTTGAGATGCCAACtgctttttGACTTTGTGGGTACGTTGATGACTTTGTGGGTACGTTGATCGACACCGAACGTGCGACAA
587_chr15:23500000-23550000_Seq_1030_22960-22989	GCGTCGTTATGGTGCAACGTGACTTTGTGGGTACGTTGATaacactcaaatagaagagaagtagaagtttGACTTTGTGGGTACGTTGATGACTTTGTGGGTACGTTGATCGACACCGAACGTGCGACAA
590_chr15:23500000-23550000_Seq_1033_23020-23049	GCGTCGTTATGGTGCAACGTGACTTTGTGGGTACGTTGATttgccaggtagggtgaaacaggggattgcaGACTTTGTGGGTACGTTGATGACTTTGTGGGTACGTTGATCGACACCGAACGTGCGACAA
593_chr15:23500000-23550000_Seq_1036_23080-23109	GCGTCGTTATGGTGCAACGTGACTTTGTGGGTACGTTGATggaactgtagggggaaacttacatatggcaGACTTTGTGGGTACGTTGATGACTTTGTGGGTACGTTGATCGACACCGAACGTGCGACAA
596_chr15:23500000-23550000_Seq_1040_23160-23189	GCGTCGTTATGGTGCAACGTGACTTTGTGGGTACGTTGATttgaatactcttttaggccccagggtatagGACTTTGTGGGTACGTTGATGACTTTGTGGGTACGTTGATCGACACCGAACGTGCGACAA
599_chr15:23500000-23550000_Seq_1044_23240-23269	GCGTCGTTATGGTGCAACGTGACTTTGTGGGTACGTTGATgcatgatggcccagagggtgagattctaatGACTTTGTGGGTACGTTGATGACTTTGTGGGTACGTTGATCGACACCGAACGTGCGACAA
602_chr15:23500000-23550000_Seq_1047_23300-23329	GCGTCGTTATGGTGCAACGTGACTTTGTGGGTACGTTGATagctgtttaagaagaggaactgaccagcctGACTTTGTGGGTACGTTGATGACTTTGTGGGTACGTTGATCGACACCGAACGTGCGACAA
605_chr15:23500000-23550000_Seq_1050_23380-23409	GCGTCGTTATGGTGCAACGTGACTTTGTGGGTACGTTGATAAAACCCCACTATATAACATAGATATTCTGGACTTTGTGGGTACGTTGATGACTTTGTGGGTACGTTGATCGACACCGAACGTGCGACAA
608_chr15:23500000-23550000_Seq_1053_23440-23469	GCGTCGTTATGGTGCAACGTGACTTTGTGGGTACGTTGATctctcacccaaaactgggtttagatatccgGACTTTGTGGGTACGTTGATGACTTTGTGGGTACGTTGATCGACACCGAACGTGCGACAA
611_chr15:23500000-23550000_Seq_1056_23500-23529	GCGTCGTTATGGTGCAACGTGACTTTGTGGGTACGTTGATggtataaatatgtttactgctcacataatgGACTTTGTGGGTACGTTGATGACTTTGTGGGTACGTTGATCGACACCGAACGTGCGACAA
614_chr15:23500000-23550000_Seq_1060_23591-23620	GCGTCGTTATGGTGCAACGTGACTTTGTGGGTACGTTGATaaaaagaaaatggacttgtggttttgaaggGACTTTGTGGGTACGTTGATGACTTTGTGGGTACGTTGATCGACACCGAACGTGCGACAA
617_chr15:23500000-23550000_Seq_1063_23651-23680	GCGTCGTTATGGTGCAACGTGACTTTGTGGGTACGTTGATcattgcatggttttaatttcctgctcctgcGACTTTGTGGGTACGTTGATGACTTTGTGGGTACGTTGATCGACACCGAACGTGCGACAA
620_chr15:23500000-23550000_Seq_1066_23711-23740	GCGTCGTTATGGTGCAACGTGACTTTGTGGGTACGTTGATtcatattgtctatatgtgaggtagaaatggGACTTTGTGGGTACGTTGATGACTTTGTGGGTACGTTGATCGACACCGAACGTGCGACAA
623_chr15:23500000-23550000_Seq_1069_23771-23800	GCGTCGTTATGGTGCAACGTGACTTTGTGGGTACGTTGATagaagtcaaatatcaaaaaTGAATGATGCCGACTTTGTGGGTACGTTGATGACTTTGTGGGTACGTTGATCGACACCGAACGTGCGACAA
625_chr15:23500000-23550000_Seq_1071_23811-23840	GCGTCGTTATGGTGCAACGTGACTTTGTGGGTACGTTGATATAGCTTGAACTACAGAATATGGCTGAACTGACTTTGTGGGTACGTTGATGACTTTGTGGGTACGTTGATCGACACCGAACGTGCGACAA
628_chr15:23500000-23550000_Seq_1074_23871-23900	GCGTCGTTATGGTGCAACGTGACTTTGTGGGTACGTTGATTCCAAGATTAAACAAAGTATCTCCTTAAGGGACTTTGTGGGTACGTTGATGACTTTGTGGGTACGTTGATCGACACCGAACGTGCGACAA
631_chr15:23500000-23550000_Seq_1077_23931-23960	GCGTCGTTATGGTGCAACGTGACTTTGTGGGTACGTTGATAGAGACCATAGACTTCTACCAATTTTTCATGACTTTGTGGGTACGTTGATGACTTTGTGGGTACGTTGATCGACACCGAACGTGCGACAA
634_chr15:23500000-23550000_Seq_1080_24009-24038	GCGTCGTTATGGTGCAACGTGACTTTGTGGGTACGTTGATAAGATAGCAAGCAAGGCCTTTTGGAATATAGACTTTGTGGGTACGTTGATGACTTTGTGGGTACGTTGATCGACACCGAACGTGCGACAA
637_chr15:23500000-23550000_Seq_1083_24076-24105	GCGTCGTTATGGTGCAACGTGACTTTGTGGGTACGTTGATTTGAAATTGCATTTATTAGTGTACTTAGGCGACTTTGTGGGTACGTTGATGACTTTGTGGGTACGTTGATCGACACCGAACGTGCGACAA
640_chr15:23500000-23550000_Seq_1086_24237-24266	GCGTCGTTATGGTGCAACGTGACTTTGTGGGTACGTTGATAGAGTTATCAATTTTGACATTATTGACAGGGACTTTGTGGGTACGTTGATGACTTTGTGGGTACGTTGATCGACACCGAACGTGCGACAA
643_chr15:23500000-23550000_Seq_1089_24318-24347	GCGTCGTTATGGTGCAACGTGACTTTGTGGGTACGTTGATAAAAATTGTGTTCTGCctgggcacggtggcGACTTTGTGGGTACGTTGATGACTTTGTGGGTACGTTGATCGACACCGAACGTGCGACAA
646_chr15:23500000-23550000_Seq_1104_24652-24681	GCGTCGTTATGGTGCAACGTGACTTTGTGGGTACGTTGATCTATatcctcaacacagataacttctgataGACTTTGTGGGTACGTTGATGACTTTGTGGGTACGTTGATCGACACCGAACGTGCGACAA
649_chr15:23500000-23550000_Seq_1107_24712-24741	GCGTCGTTATGGTGCAACGTGACTTTGTGGGTACGTTGATcacgaaattctctagcaaactcacaaaagcGACTTTGTGGGTACGTTGATGACTTTGTGGGTACGTTGATCGACACCGAACGTGCGACAA
652_chr15:23500000-23550000_Seq_1110_24776-24805	GCGTCGTTATGGTGCAACGTGACTTTGTGGGTACGTTGATtacaaagggcatttcaaaagatacagatgaGACTTTGTGGGTACGTTGATGACTTTGTGGGTACGTTGATCGACACCGAACGTGCGACAA
655_chr15:23500000-23550000_Seq_1115_24876-24905	GCGTCGTTATGGTGCAACGTGACTTTGTGGGTACGTTGATgaattggggtgtgccactctcctgacacgtGACTTTGTGGGTACGTTGATGACTTTGTGGGTACGTTGATCGACACCGAACGTGCGACAA
658_chr15:23500000-23550000_Seq_1118_24936-24965	GCGTCGTTATGGTGCAACGTGACTTTGTGGGTACGTTGATtccccaagccccatacgttagggattttTCGACTTTGTGGGTACGTTGATGACTTTGTGGGTACGTTGATCGACACCGAACGTGCGACAA
661_chr15:23500000-23550000_Seq_1121_25024-25053	GCGTCGTTATGGTGCAACGTGACTTTGTGGGTACGTTGATCAATTTCAAGCCCAATTAGtcattaacagtGACTTTGTGGGTACGTTGATGACTTTGTGGGTACGTTGATCGACACCGAACGTGCGACAA
664_chr15:23500000-23550000_Seq_1124_25084-25113	GCGTCGTTATGGTGCAACGTGACTTTGTGGGTACGTTGATatgtttcctagagggatgccactcaggtttGACTTTGTGGGTACGTTGATGACTTTGTGGGTACGTTGATCGACACCGAACGTGCGACAA
667_chr15:23500000-23550000_Seq_1128_25164-25193	GCGTCGTTATGGTGCAACGTGACTTTGTGGGTACGTTGATaaaacacattgcttcacccttctgggcatcGACTTTGTGGGTACGTTGATGACTTTGTGGGTACGTTGATCGACACCGAACGTGCGACAA
670_chr15:23500000-23550000_Seq_1132_25244-25273	GCGTCGTTATGGTGCAACGTGACTTTGTGGGTACGTTGATttgaggtattaatacaacattaggcttctcGACTTTGTGGGTACGTTGATGACTTTGTGGGTACGTTGATCGACACCGAACGTGCGACAA
673_chr15:23500000-23550000_Seq_1136_25324-25353	GCGTCGTTATGGTGCAACGTGACTTTGTGGGTACGTTGATcttctctccatttgacatttatttttactcGACTTTGTGGGTACGTTGATGACTTTGTGGGTACGTTGATCGACACCGAACGTGCGACAA
676_chr15:23500000-23550000_Seq_1139_25384-25413	GCGTCGTTATGGTGCAACGTGACTTTGTGGGTACGTTGATctcaaccactgtcttggtctacagtactgcGACTTTGTGGGTACGTTGATGACTTTGTGGGTACGTTGATCGACACCGAACGTGCGACAA
679_chr15:23500000-23550000_Seq_1142_25444-25473	GCGTCGTTATGGTGCAACGTGACTTTGTGGGTACGTTGATctcagctcagtcccactgatacaggctgagGACTTTGTGGGTACGTTGATGACTTTGTGGGTACGTTGATCGACACCGAACGTGCGACAA
681_chr15:23500000-23550000_Seq_1144_25484-25513	GCGTCGTTATGGTGCAACGTGACTTTGTGGGTACGTTGATgataaaaatacgagctattctaaccactagGACTTTGTGGGTACGTTGATGACTTTGTGGGTACGTTGATCGACACCGAACGTGCGACAA
684_chr15:23500000-23550000_Seq_1147_25544-25573	GCGTCGTTATGGTGCAACGTGACTTTGTGGGTACGTTGATactgtgccagtccatccttcaggcttttggGACTTTGTGGGTACGTTGATGACTTTGTGGGTACGTTGATCGACACCGAACGTGCGACAA
687_chr15:23500000-23550000_Seq_1150_25607-25636	GCGTCGTTATGGTGCAACGTGACTTTGTGGGTACGTTGATagtttcttgcttaggaatcagcctgcttccGACTTTGTGGGTACGTTGATGACTTTGTGGGTACGTTGATCGACACCGAACGTGCGACAA
690_chr15:23500000-23550000_Seq_1153_25686-25715	GCGTCGTTATGGTGCAACGTGACTTTGTGGGTACGTTGATaaaaagacaactgaggagatatggggaagaGACTTTGTGGGTACGTTGATGACTTTGTGGGTACGTTGATCGACACCGAACGTGCGACAA
693_chr15:23500000-23550000_Seq_1156_25746-25775	GCGTCGTTATGGTGCAACGTGACTTTGTGGGTACGTTGATACCTCTtggtatggtttggatttgtgttccGACTTTGTGGGTACGTTGATGACTTTGTGGGTACGTTGATCGACACCGAACGTGCGACAA
696_chr15:23500000-23550000_Seq_1159_25828-25857	GCGTCGTTATGGTGCAACGTGACTTTGTGGGTACGTTGATgggggcatttgggtcatgggattggatcccGACTTTGTGGGTACGTTGATGACTTTGTGGGTACGTTGATCGACACCGAACGTGCGACAA
699_chr15:23500000-23550000_Seq_1162_25888-25917	GCGTCGTTATGGTGCAACGTGACTTTGTGGGTACGTTGATgatgagtgagttccttctcagttacttcacGACTTTGTGGGTACGTTGATGACTTTGTGGGTACGTTGATCGACACCGAACGTGCGACAA
702_chr15:23500000-23550000_Seq_1166_25968-25997	GCGTCGTTATGGTGCAACGTGACTTTGTGGGTACGTTGATctgcctctctcactgtgtgacgtgctggctGACTTTGTGGGTACGTTGATGACTTTGTGGGTACGTTGATCGACACCGAACGTGCGACAA
705_chr15:23500000-23550000_Seq_1172_26088-26117	GCGTCGTTATGGTGCAACGTGACTTTGTGGGTACGTTGATtgcgagacaaaataaacctcattttctttgGACTTTGTGGGTACGTTGATGACTTTGTGGGTACGTTGATCGACACCGAACGTGCGACAA
708_chr15:23500000-23550000_Seq_1177_26188-26217	GCGTCGTTATGGTGCAACGTGACTTTGTGGGTACGTTGATgagcccaactgataagagtgaagtttggtaGACTTTGTGGGTACGTTGATGACTTTGTGGGTACGTTGATCGACACCGAACGTGCGACAA
711_chr15:23500000-23550000_Seq_1182_26290-26319	GCGTCGTTATGGTGCAACGTGACTTTGTGGGTACGTTGATcttcacttttggagaagaatgtgagcacatGACTTTGTGGGTACGTTGATGACTTTGTGGGTACGTTGATCGACACCGAACGTGCGACAA
714_chr15:23500000-23550000_Seq_1185_26350-26379	GCGTCGTTATGGTGCAACGTGACTTTGTGGGTACGTTGATggtggtgggaaagcaagcaggtgaggggtcGACTTTGTGGGTACGTTGATGACTTTGTGGGTACGTTGATCGACACCGAACGTGCGACAA
717_chr15:23500000-23550000_Seq_1189_26430-26459	GCGTCGTTATGGTGCAACGTGACTTTGTGGGTACGTTGATtggcatcttcacgggcaggcatactttgggGACTTTGTGGGTACGTTGATGACTTTGTGGGTACGTTGATCGACACCGAACGTGCGACAA
720_chr15:23500000-23550000_Seq_1196_26570-26599	GCGTCGTTATGGTGCAACGTGACTTTGTGGGTACGTTGATaagggcaggtaaaatgctatatttgtaatcGACTTTGTGGGTACGTTGATGACTTTGTGGGTACGTTGATCGACACCGAACGTGCGACAA
723_chr15:23500000-23550000_Seq_1200_26655-26684	GCGTCGTTATGGTGCAACGTGACTTTGTGGGTACGTTGATgataattaaactctctctttgaaaaatgggGACTTTGTGGGTACGTTGATGACTTTGTGGGTACGTTGATCGACACCGAACGTGCGACAA
726_chr15:23500000-23550000_Seq_1205_26768-26797	GCGTCGTTATGGTGCAACGTGACTTTGTGGGTACGTTGATCTGCTGAAAGAGGGTATACTCATTGGGTGTGACTTTGTGGGTACGTTGATGACTTTGTGGGTACGTTGATCGACACCGAACGTGCGACAA
729_chr15:23500000-23550000_Seq_1208_26828-26857	GCGTCGTTATGGTGCAACGTGACTTTGTGGGTACGTTGATAATATTCACAATACCTGGACTTACAGAGGAGACTTTGTGGGTACGTTGATGACTTTGTGGGTACGTTGATCGACACCGAACGTGCGACAA
732_chr15:23500000-23550000_Seq_1211_26888-26917	GCGTCGTTATGGTGCAACGTGACTTTGTGGGTACGTTGATTGGGAAAGCCTGTTGTGTATTCTTATTACAGACTTTGTGGGTACGTTGATGACTTTGTGGGTACGTTGATCGACACCGAACGTGCGACAA
735_chr15:23500000-23550000_Seq_1214_26948-26977	GCGTCGTTATGGTGCAACGTGACTTTGTGGGTACGTTGATgagggaaatgtctactgcaaccagggccaaGACTTTGTGGGTACGTTGATGACTTTGTGGGTACGTTGATCGACACCGAACGTGCGACAA
737_chr15:23500000-23550000_Seq_1217_27008-27037	GCGTCGTTATGGTGCAACGTGACTTTGTGGGTACGTTGATtcctgacctgaaccaggacactaaccattgGACTTTGTGGGTACGTTGATGACTTTGTGGGTACGTTGATCGACACCGAACGTGCGACAA
740_chr15:23500000-23550000_Seq_1220_27068-27097	GCGTCGTTATGGTGCAACGTGACTTTGTGGGTACGTTGATtttgttttattggtgcatatcttgcagggcGACTTTGTGGGTACGTTGATGACTTTGTGGGTACGTTGATCGACACCGAACGTGCGACAA
743_chr15:23500000-23550000_Seq_1223_27131-27160	GCGTCGTTATGGTGCAACGTGACTTTGTGGGTACGTTGATatacacagaagttagtcttaattataaggcGACTTTGTGGGTACGTTGATGACTTTGTGGGTACGTTGATCGACACCGAACGTGCGACAA
746_chr15:23500000-23550000_Seq_1226_27191-27220	GCGTCGTTATGGTGCAACGTGACTTTGTGGGTACGTTGATtgatgaaagattggctaagtgtatattcaaGACTTTGTGGGTACGTTGATGACTTTGTGGGTACGTTGATCGACACCGAACGTGCGACAA
749_chr15:23500000-23550000_Seq_1230_27271-27300	GCGTCGTTATGGTGCAACGTGACTTTGTGGGTACGTTGATCTAGTtcttgagagtagattagttttgtagGACTTTGTGGGTACGTTGATGACTTTGTGGGTACGTTGATCGACACCGAACGTGCGACAA
752_chr15:23500000-23550000_Seq_1233_27331-27360	GCGTCGTTATGGTGCAACGTGACTTTGTGGGTACGTTGATatgggtgaggcctctgtatataatgaaggcGACTTTGTGGGTACGTTGATGACTTTGTGGGTACGTTGATCGACACCGAACGTGCGACAA
755_chr15:23500000-23550000_Seq_1239_27453-27482	GCGTCGTTATGGTGCAACGTGACTTTGTGGGTACGTTGATcatcttcagttatagagagggaaggtggtgGACTTTGTGGGTACGTTGATGACTTTGTGGGTACGTTGATCGACACCGAACGTGCGACAA
758_chr15:23500000-23550000_Seq_1242_27574-27603	GCGTCGTTATGGTGCAACGTGACTTTGTGGGTACGTTGATaaaagtgttaatttgagacttatatcccagGACTTTGTGGGTACGTTGATGACTTTGTGGGTACGTTGATCGACACCGAACGTGCGACAA
761_chr15:23500000-23550000_Seq_1246_27664-27693	GCGTCGTTATGGTGCAACGTGACTTTGTGGGTACGTTGATgagtctaccaagtgtactatagtttttaacGACTTTGTGGGTACGTTGATGACTTTGTGGGTACGTTGATCGACACCGAACGTGCGACAA
764_chr15:23500000-23550000_Seq_1249_27735-27764	GCGTCGTTATGGTGCAACGTGACTTTGTGGGTACGTTGATgacaaatcataataggaacaattgatttgcGACTTTGTGGGTACGTTGATGACTTTGTGGGTACGTTGATCGACACCGAACGTGCGACAA
767_chr15:23500000-23550000_Seq_1256_27890-27919	GCGTCGTTATGGTGCAACGTGACTTTGTGGGTACGTTGATcaaattagactttaaaagcattttgagcccGACTTTGTGGGTACGTTGATGACTTTGTGGGTACGTTGATCGACACCGAACGTGCGACAA
770_chr15:23500000-23550000_Seq_1264_28050-28079	GCGTCGTTATGGTGCAACGTGACTTTGTGGGTACGTTGATaccctgagcagggactgcctagacaaagtaGACTTTGTGGGTACGTTGATGACTTTGTGGGTACGTTGATCGACACCGAACGTGCGACAA
773_chr15:23500000-23550000_Seq_1273_28240-28269	GCGTCGTTATGGTGCAACGTGACTTTGTGGGTACGTTGATttggattaggcaaataactagactgccataGACTTTGTGGGTACGTTGATGACTTTGTGGGTACGTTGATCGACACCGAACGTGCGACAA
776_chr15:23500000-23550000_Seq_1277_28320-28349	GCGTCGTTATGGTGCAACGTGACTTTGTGGGTACGTTGATagagaaagaaatgtccctcaagttttgcttGACTTTGTGGGTACGTTGATGACTTTGTGGGTACGTTGATCGACACCGAACGTGCGACAA
779_chr15:23500000-23550000_Seq_1282_28478-28507	GCGTCGTTATGGTGCAACGTGACTTTGTGGGTACGTTGATaacaaaaagtcacaaaagattatttcgctcGACTTTGTGGGTACGTTGATGACTTTGTGGGTACGTTGATCGACACCGAACGTGCGACAA
782_chr15:23500000-23550000_Seq_1287_28578-28607	GCGTCGTTATGGTGCAACGTGACTTTGTGGGTACGTTGATggagtcttggaagtttatttcttctattttGACTTTGTGGGTACGTTGATGACTTTGTGGGTACGTTGATCGACACCGAACGTGCGACAA
785_chr15:23500000-23550000_Seq_1291_28671-28700	GCGTCGTTATGGTGCAACGTGACTTTGTGGGTACGTTGATctgtattataaagctgcctttgaaaagaatGACTTTGTGGGTACGTTGATGACTTTGTGGGTACGTTGATCGACACCGAACGTGCGACAA
788_chr15:23500000-23550000_Seq_1295_28771-28800	GCGTCGTTATGGTGCAACGTGACTTTGTGGGTACGTTGATggcacacataatttaatagagctatcataaGACTTTGTGGGTACGTTGATGACTTTGTGGGTACGTTGATCGACACCGAACGTGCGACAA
791_chr15:23500000-23550000_Seq_1299_28965-28994	GCGTCGTTATGGTGCAACGTGACTTTGTGGGTACGTTGATcatatgtctcttttgggcttgagaaaacctGACTTTGTGGGTACGTTGATGACTTTGTGGGTACGTTGATCGACACCGAACGTGCGACAA
794_chr15:23500000-23550000_Seq_1302_29098-29127	GCGTCGTTATGGTGCAACGTGACTTTGTGGGTACGTTGATgaaacccaggtcattataaattagagggaaGACTTTGTGGGTACGTTGATGACTTTGTGGGTACGTTGATCGACACCGAACGTGCGACAA
796_chr15:23500000-23550000_Seq_1304_29138-29167	GCGTCGTTATGGTGCAACGTGACTTTGTGGGTACGTTGATcattgatagagggcagaatcacctttccaaGACTTTGTGGGTACGTTGATGACTTTGTGGGTACGTTGATCGACACCGAACGTGCGACAA
799_chr15:23500000-23550000_Seq_1313_29412-29441	GCGTCGTTATGGTGCAACGTGACTTTGTGGGTACGTTGATtgtaagatttcaataagccttatataacccGACTTTGTGGGTACGTTGATGACTTTGTGGGTACGTTGATCGACACCGAACGTGCGACAA
802_chr15:23500000-23550000_Seq_1318_29551-29580	GCGTCGTTATGGTGCAACGTGACTTTGTGGGTACGTTGATgtttaatttccagaagaatgaattaatcccGACTTTGTGGGTACGTTGATGACTTTGTGGGTACGTTGATCGACACCGAACGTGCGACAA
805_chr15:23500000-23550000_Seq_1323_29662-29691	GCGTCGTTATGGTGCAACGTGACTTTGTGGGTACGTTGATtaaaccttcggtttagtcctgttactatttGACTTTGTGGGTACGTTGATGACTTTGTGGGTACGTTGATCGACACCGAACGTGCGACAA
808_chr15:23500000-23550000_Seq_1326_29735-29764	GCGTCGTTATGGTGCAACGTGACTTTGTGGGTACGTTGATtatcccctttaacaaaatcatatttccatgGACTTTGTGGGTACGTTGATGACTTTGTGGGTACGTTGATCGACACCGAACGTGCGACAA
811_chr15:23500000-23550000_Seq_1336_29950-29979	GCGTCGTTATGGTGCAACGTGACTTTGTGGGTACGTTGATcaggacaaggaccaagccacaggcaatgacGACTTTGTGGGTACGTTGATGACTTTGTGGGTACGTTGATCGACACCGAACGTGCGACAA
814_chr15:23500000-23550000_Seq_1341_30073-30102	GCGTCGTTATGGTGCAACGTGACTTTGTGGGTACGTTGATtattaaaactcataaaagcagttcatgaccGACTTTGTGGGTACGTTGATGACTTTGTGGGTACGTTGATCGACACCGAACGTGCGACAA
817_chr15:23500000-23550000_Seq_1347_30230-30259	GCGTCGTTATGGTGCAACGTGACTTTGTGGGTACGTTGATcatgtgacctaaagtcattcaagtttctatGACTTTGTGGGTACGTTGATGACTTTGTGGGTACGTTGATCGACACCGAACGTGCGACAA
820_chr15:23500000-23550000_Seq_1352_30384-30413	GCGTCGTTATGGTGCAACGTGACTTTGTGGGTACGTTGATatcactagttgcacgatttttcatttgctgGACTTTGTGGGTACGTTGATGACTTTGTGGGTACGTTGATCGACACCGAACGTGCGACAA
823_chr15:23500000-23550000_Seq_1370_30807-30836	GCGTCGTTATGGTGCAACGTGACTTTGTGGGTACGTTGATtttaaggacgtaacatttacatacctgagaGACTTTGTGGGTACGTTGATGACTTTGTGGGTACGTTGATCGACACCGAACGTGCGACAA
826_chr15:23500000-23550000_Seq_1373_30916-30945	GCGTCGTTATGGTGCAACGTGACTTTGTGGGTACGTTGATaaaaagagcgaaatgctacagaacaaagtgGACTTTGTGGGTACGTTGATGACTTTGTGGGTACGTTGATCGACACCGAACGTGCGACAA
829_chr15:23500000-23550000_Seq_1379_31036-31065	GCGTCGTTATGGTGCAACGTGACTTTGTGGGTACGTTGATatcccccattccatacctttcagttgccctGACTTTGTGGGTACGTTGATGACTTTGTGGGTACGTTGATCGACACCGAACGTGCGACAA
832_chr15:23500000-23550000_Seq_1383_31139-31168	GCGTCGTTATGGTGCAACGTGACTTTGTGGGTACGTTGATaactgccattggtcttccctaaaaacacatGACTTTGTGGGTACGTTGATGACTTTGTGGGTACGTTGATCGACACCGAACGTGCGACAA
835_chr15:23500000-23550000_Seq_1392_31348-31377	GCGTCGTTATGGTGCAACGTGACTTTGTGGGTACGTTGATttctcccaaaatagagtgtgtggcacctacGACTTTGTGGGTACGTTGATGACTTTGTGGGTACGTTGATCGACACCGAACGTGCGACAA
838_chr15:23500000-23550000_Seq_1397_31448-31477	GCGTCGTTATGGTGCAACGTGACTTTGTGGGTACGTTGATgcaagaaagcaaacggaattcgattgactgGACTTTGTGGGTACGTTGATGACTTTGTGGGTACGTTGATCGACACCGAACGTGCGACAA
841_chr15:23500000-23550000_Seq_1400_31565-31594	GCGTCGTTATGGTGCAACGTGACTTTGTGGGTACGTTGATacagagagagagctggctatcaattttcagGACTTTGTGGGTACGTTGATGACTTTGTGGGTACGTTGATCGACACCGAACGTGCGACAA
844_chr15:23500000-23550000_Seq_1418_32015-32044	GCGTCGTTATGGTGCAACGTGACTTTGTGGGTACGTTGATtttttccccaaaagttgtgctcccaagtgaGACTTTGTGGGTACGTTGATGACTTTGTGGGTACGTTGATCGACACCGAACGTGCGACAA
847_chr15:23500000-23550000_Seq_1426_32178-32207	GCGTCGTTATGGTGCAACGTGACTTTGTGGGTACGTTGATaatcagaagctgtccccggagggaaaaacaGACTTTGTGGGTACGTTGATGACTTTGTGGGTACGTTGATCGACACCGAACGTGCGACAA
850_chr15:23500000-23550000_Seq_1429_32238-32267	GCGTCGTTATGGTGCAACGTGACTTTGTGGGTACGTTGATgaaaacagaaatgactcattctcgaatctaGACTTTGTGGGTACGTTGATGACTTTGTGGGTACGTTGATCGACACCGAACGTGCGACAA
852_chr15:23500000-23550000_Seq_1433_32318-32347	GCGTCGTTATGGTGCAACGTGACTTTGTGGGTACGTTGATgctgtagcacaaggcaacagctggtgctttGACTTTGTGGGTACGTTGATGACTTTGTGGGTACGTTGATCGACACCGAACGTGCGACAA
855_chr15:23500000-23550000_Seq_1438_32418-32447	GCGTCGTTATGGTGCAACGTGACTTTGTGGGTACGTTGATtagccataatatTATCATgtcctcttttcaGACTTTGTGGGTACGTTGATGACTTTGTGGGTACGTTGATCGACACCGAACGTGCGACAA
858_chr15:23500000-23550000_Seq_1441_32478-32507	GCGTCGTTATGGTGCAACGTGACTTTGTGGGTACGTTGATagcatgagaaCTTTTAAAGCAACAGACAGTGACTTTGTGGGTACGTTGATGACTTTGTGGGTACGTTGATCGACACCGAACGTGCGACAA
861_chr15:23500000-23550000_Seq_1448_32673-32702	GCGTCGTTATGGTGCAACGTGACTTTGTGGGTACGTTGATttacagatgaaaaccattccacaattttggGACTTTGTGGGTACGTTGATGACTTTGTGGGTACGTTGATCGACACCGAACGTGCGACAA
864_chr15:23500000-23550000_Seq_1452_32867-32896	GCGTCGTTATGGTGCAACGTGACTTTGTGGGTACGTTGATtacttctgaaaactgatattttacacaaggGACTTTGTGGGTACGTTGATGACTTTGTGGGTACGTTGATCGACACCGAACGTGCGACAA
867_chr15:23500000-23550000_Seq_1459_33021-33050	GCGTCGTTATGGTGCAACGTGACTTTGTGGGTACGTTGATggctgttttcattaaataatatcaaacgtcGACTTTGTGGGTACGTTGATGACTTTGTGGGTACGTTGATCGACACCGAACGTGCGACAA
870_chr15:23500000-23550000_Seq_1466_33229-33258	GCGTCGTTATGGTGCAACGTGACTTTGTGGGTACGTTGATtgaatactccttAACTTtcctatagcttctGACTTTGTGGGTACGTTGATGACTTTGTGGGTACGTTGATCGACACCGAACGTGCGACAA
873_chr15:23500000-23550000_Seq_1474_33424-33453	GCGTCGTTATGGTGCAACGTGACTTTGTGGGTACGTTGATGCCGACCTCTGCATAAGAACCAACTTCTACGACTTTGTGGGTACGTTGATGACTTTGTGGGTACGTTGATCGACACCGAACGTGCGACAA
876_chr15:23500000-23550000_Seq_1477_33484-33513	GCGTCGTTATGGTGCAACGTGACTTTGTGGGTACGTTGATCAAAAATACTCAAGCAACCAACAGGAAATTGACTTTGTGGGTACGTTGATGACTTTGTGGGTACGTTGATCGACACCGAACGTGCGACAA
879_chr15:23500000-23550000_Seq_1480_33544-33573	GCGTCGTTATGGTGCAACGTGACTTTGTGGGTACGTTGATggtgactgccccaccattctcatttatcttGACTTTGTGGGTACGTTGATGACTTTGTGGGTACGTTGATCGACACCGAACGTGCGACAA
882_chr15:23500000-23550000_Seq_1483_33604-33633	GCGTCGTTATGGTGCAACGTGACTTTGTGGGTACGTTGATCAGCTCTCCCAGATGATCAGGAGGGTGAAAGACTTTGTGGGTACGTTGATGACTTTGTGGGTACGTTGATCGACACCGAACGTGCGACAA
885_chr15:23500000-23550000_Seq_1486_33664-33693	GCGTCGTTATGGTGCAACGTGACTTTGTGGGTACGTTGATGCACACACACAAAGTAATCTATCAACACATGACTTTGTGGGTACGTTGATGACTTTGTGGGTACGTTGATCGACACCGAACGTGCGACAA
888_chr15:23500000-23550000_Seq_1489_33724-33753	GCGTCGTTATGGTGCAACGTGACTTTGTGGGTACGTTGATCGCAGTCAAGGGGTTGGGTGAGGTCCTAAAGACTTTGTGGGTACGTTGATGACTTTGTGGGTACGTTGATCGACACCGAACGTGCGACAA
891_chr15:23500000-23550000_Seq_1492_33784-33813	GCGTCGTTATGGTGCAACGTGACTTTGTGGGTACGTTGATGACAGCTGAGTCCAAGCTGAGCAAAGCTCCGACTTTGTGGGTACGTTGATGACTTTGTGGGTACGTTGATCGACACCGAACGTGCGACAA
894_chr15:23500000-23550000_Seq_1495_33844-33873	GCGTCGTTATGGTGCAACGTGACTTTGTGGGTACGTTGATTGCTCAAATGGTGTCACCAGCAGCCAAGTCGACTTTGTGGGTACGTTGATGACTTTGTGGGTACGTTGATCGACACCGAACGTGCGACAA
897_chr15:23500000-23550000_Seq_1498_33904-33933	GCGTCGTTATGGTGCAACGTGACTTTGTGGGTACGTTGATAAAAGAGGCAGAGAGTGGTCGGGGGCATTCGACTTTGTGGGTACGTTGATGACTTTGTGGGTACGTTGATCGACACCGAACGTGCGACAA
900_chr15:23500000-23550000_Seq_1501_33988-34017	GCGTCGTTATGGTGCAACGTGACTTTGTGGGTACGTTGATTGTACCAGCAAAGTGTTGAAGGCAGCAGACGACTTTGTGGGTACGTTGATGACTTTGTGGGTACGTTGATCGACACCGAACGTGCGACAA
903_chr15:23500000-23550000_Seq_1507_34112-34141	GCGTCGTTATGGTGCAACGTGACTTTGTGGGTACGTTGATttattttcctttctaatgaggatcagcctgGACTTTGTGGGTACGTTGATGACTTTGTGGGTACGTTGATCGACACCGAACGTGCGACAA
906_chr15:23500000-23550000_Seq_1516_34292-34321	GCGTCGTTATGGTGCAACGTGACTTTGTGGGTACGTTGATattagggtgCCTATAAAATTTGTTGTGGCCGACTTTGTGGGTACGTTGATGACTTTGTGGGTACGTTGATCGACACCGAACGTGCGACAA
908_chr15:23500000-23550000_Seq_1523_34432-34461	GCGTCGTTATGGTGCAACGTGACTTTGTGGGTACGTTGATacatgtgtctctgtcttgaattctttctcaGACTTTGTGGGTACGTTGATGACTTTGTGGGTACGTTGATCGACACCGAACGTGCGACAA
911_chr15:23500000-23550000_Seq_1527_34512-34541	GCGTCGTTATGGTGCAACGTGACTTTGTGGGTACGTTGATcaGTACATACCCCTAGACAACGTAGCCATTGACTTTGTGGGTACGTTGATGACTTTGTGGGTACGTTGATCGACACCGAACGTGCGACAA
914_chr15:23500000-23550000_Seq_1530_34572-34601	GCGTCGTTATGGTGCAACGTGACTTTGTGGGTACGTTGATTTTCCCAAAAACAAAAGCATTTTTGGCActGACTTTGTGGGTACGTTGATGACTTTGTGGGTACGTTGATCGACACCGAACGTGCGACAA
917_chr15:23500000-23550000_Seq_1537_34712-34741	GCGTCGTTATGGTGCAACGTGACTTTGTGGGTACGTTGATggaatctaccttgagtctccgatgagatttGACTTTGTGGGTACGTTGATGACTTTGTGGGTACGTTGATCGACACCGAACGTGCGACAA
920_chr15:23500000-23550000_Seq_1543_34832-34861	GCGTCGTTATGGTGCAACGTGACTTTGTGGGTACGTTGATtggagggccggggtggaatgataaaatctgGACTTTGTGGGTACGTTGATGACTTTGTGGGTACGTTGATCGACACCGAACGTGCGACAA
923_chr15:23500000-23550000_Seq_1546_34892-34921	GCGTCGTTATGGTGCAACGTGACTTTGTGGGTACGTTGATatgggacctccaatgttggaggtgggcctaGACTTTGTGGGTACGTTGATGACTTTGTGGGTACGTTGATCGACACCGAACGTGCGACAA
926_chr15:23500000-23550000_Seq_1549_34952-34981	GCGTCGTTATGGTGCAACGTGACTTTGTGGGTACGTTGATcccttattaatggtttagcCTTtctagccaGACTTTGTGGGTACGTTGATGACTTTGTGGGTACGTTGATCGACACCGAACGTGCGACAA
929_chr15:23500000-23550000_Seq_1566_35329-35358	GCGTCGTTATGGTGCAACGTGACTTTGTGGGTACGTTGATtgctgggattacggggtgagccaccatgccGACTTTGTGGGTACGTTGATGACTTTGTGGGTACGTTGATCGACACCGAACGTGCGACAA
932_chr15:23500000-23550000_Seq_1569_35389-35418	GCGTCGTTATGGTGCAACGTGACTTTGTGGGTACGTTGATcccctgttttaaacagcaactattttgactGACTTTGTGGGTACGTTGATGACTTTGTGGGTACGTTGATCGACACCGAACGTGCGACAA
935_chr15:23500000-23550000_Seq_1572_35449-35478	GCGTCGTTATGGTGCAACGTGACTTTGTGGGTACGTTGATtcctaggatgatatgcaacatgatgtgttcGACTTTGTGGGTACGTTGATGACTTTGTGGGTACGTTGATCGACACCGAACGTGCGACAA
938_chr15:23500000-23550000_Seq_1575_35509-35538	GCGTCGTTATGGTGCAACGTGACTTTGTGGGTACGTTGATatgctatcggtttgatttgacaaaatgtaaGACTTTGTGGGTACGTTGATGACTTTGTGGGTACGTTGATCGACACCGAACGTGCGACAA
941_chr15:23500000-23550000_Seq_1578_35575-35604	GCGTCGTTATGGTGCAACGTGACTTTGTGGGTACGTTGATgattctttaatagtattttgagcatttgcgGACTTTGTGGGTACGTTGATGACTTTGTGGGTACGTTGATCGACACCGAACGTGCGACAA
944_chr15:23500000-23550000_Seq_1581_35635-35664	GCGTCGTTATGGTGCAACGTGACTTTGTGGGTACGTTGATgtaaaaatctattcctgtcaggacaaatttGACTTTGTGGGTACGTTGATGACTTTGTGGGTACGTTGATCGACACCGAACGTGCGACAA
947_chr15:23500000-23550000_Seq_1585_35715-35744	GCGTCGTTATGGTGCAACGTGACTTTGTGGGTACGTTGATatgtgcttctccctgggtgaccttccccatGACTTTGTGGGTACGTTGATGACTTTGTGGGTACGTTGATCGACACCGAACGTGCGACAA
950_chr15:23500000-23550000_Seq_1589_35795-35824	GCGTCGTTATGGTGCAACGTGACTTTGTGGGTACGTTGATtgtcattttgtgcctcagcttgtataagagGACTTTGTGGGTACGTTGATGACTTTGTGGGTACGTTGATCGACACCGAACGTGCGACAA
953_chr15:23500000-23550000_Seq_1592_35855-35884	GCGTCGTTATGGTGCAACGTGACTTTGTGGGTACGTTGATtgctgcagcatccccacccccatgttcactGACTTTGTGGGTACGTTGATGACTTTGTGGGTACGTTGATCGACACCGAACGTGCGACAA
956_chr15:23500000-23550000_Seq_1595_35915-35944	GCGTCGTTATGGTGCAACGTGACTTTGTGGGTACGTTGATagggtccacttggtggttccaatcactcggGACTTTGTGGGTACGTTGATGACTTTGTGGGTACGTTGATCGACACCGAACGTGCGACAA
959_chr15:23500000-23550000_Seq_1598_35975-36004	GCGTCGTTATGGTGCAACGTGACTTTGTGGGTACGTTGATattaacaagtcttactgtaatgcccccttaGACTTTGTGGGTACGTTGATGACTTTGTGGGTACGTTGATCGACACCGAACGTGCGACAA
962_chr15:23500000-23550000_Seq_1601_36035-36064	GCGTCGTTATGGTGCAACGTGACTTTGTGGGTACGTTGATgcccatgcaggcatccctttaatggtccagGACTTTGTGGGTACGTTGATGACTTTGTGGGTACGTTGATCGACACCGAACGTGCGACAA
964_chr15:23500000-23550000_Seq_1603_36075-36104	GCGTCGTTATGGTGCAACGTGACTTTGTGGGTACGTTGATcccagctacctgaccatatgatcaggatttGACTTTGTGGGTACGTTGATGACTTTGTGGGTACGTTGATCGACACCGAACGTGCGACAA
967_chr15:23500000-23550000_Seq_1607_36155-36184	GCGTCGTTATGGTGCAACGTGACTTTGTGGGTACGTTGATtgttaatgtcttccatcactgctaggaaaaGACTTTGTGGGTACGTTGATGACTTTGTGGGTACGTTGATCGACACCGAACGTGCGACAA
970_chr15:23500000-23550000_Seq_1610_36222-36251	GCGTCGTTATGGTGCAACGTGACTTTGTGGGTACGTTGATatcttcaatcagagcctttccacccgctggGACTTTGTGGGTACGTTGATGACTTTGTGGGTACGTTGATCGACACCGAACGTGCGACAA
973_chr15:23500000-23550000_Seq_1613_36282-36311	GCGTCGTTATGGTGCAACGTGACTTTGTGGGTACGTTGATttgtgtgttcatcatgtaaccgccatttttGACTTTGTGGGTACGTTGATGACTTTGTGGGTACGTTGATCGACACCGAACGTGCGACAA
976_chr15:23500000-23550000_Seq_1616_36342-36371	GCGTCGTTATGGTGCAACGTGACTTTGTGGGTACGTTGATaagctgttcttcaggttctgttgatccagcGACTTTGTGGGTACGTTGATGACTTTGTGGGTACGTTGATCGACACCGAACGTGCGACAA
979_chr15:23500000-23550000_Seq_1619_36402-36431	GCGTCGTTATGGTGCAACGTGACTTTGTGGGTACGTTGATgggggaaaaggtgccatctgctcgggaataGACTTTGTGGGTACGTTGATGACTTTGTGGGTACGTTGATCGACACCGAACGTGCGACAA
982_chr15:23500000-23550000_Seq_1622_36462-36491	GCGTCGTTATGGTGCAACGTGACTTTGTGGGTACGTTGATtatgcttctgtttgagccatttcctttttaGACTTTGTGGGTACGTTGATGACTTTGTGGGTACGTTGATCGACACCGAACGTGCGACAA
985_chr15:23500000-23550000_Seq_1625_36522-36551	GCGTCGTTATGGTGCAACGTGACTTTGTGGGTACGTTGATtactagagtgtttctctgatatcacccaaaGACTTTGTGGGTACGTTGATGACTTTGTGGGTACGTTGATCGACACCGAACGTGCGACAA
988_chr15:23500000-23550000_Seq_1628_36582-36611	GCGTCGTTATGGTGCAACGTGACTTTGTGGGTACGTTGATtgtgtccttcagtcattgaggcagtctcaaGACTTTGTGGGTACGTTGATGACTTTGTGGGTACGTTGATCGACACCGAACGTGCGACAA
991_chr15:23500000-23550000_Seq_1631_36642-36671	GCGTCGTTATGGTGCAACGTGACTTTGTGGGTACGTTGATtttcaaatagtgtgtgccaggtagcagcatGACTTTGTGGGTACGTTGATGACTTTGTGGGTACGTTGATCGACACCGAACGTGCGACAA
994_chr15:23500000-23550000_Seq_1634_36702-36731	GCGTCGTTATGGTGCAACGTGACTTTGTGGGTACGTTGATgtccttgcaggaagagatcacaggcttttgGACTTTGTGGGTACGTTGATGACTTTGTGGGTACGTTGATCGACACCGAACGTGCGACAA
997_chr15:23500000-23550000_Seq_1637_36762-36791	GCGTCGTTATGGTGCAACGTGACTTTGTGGGTACGTTGATGGTAGATACTTCCAAAATCATTTCTGAGTGGACTTTGTGGGTACGTTGATGACTTTGTGGGTACGTTGATCGACACCGAACGTGCGACAA
1000_chr15:23500000-23550000_Seq_1640_36822-36851	GCGTCGTTATGGTGCAACGTGACTTTGTGGGTACGTTGATctgcacagataggccacagtaatcccctgtGACTTTGTGGGTACGTTGATGACTTTGTGGGTACGTTGATCGACACCGAACGTGCGACAA
1003_chr15:23500000-23550000_Seq_1643_36882-36911	GCGTCGTTATGGTGCAACGTGACTTTGTGGGTACGTTGATcaccagttgggactccccacaggaaacctgGACTTTGTGGGTACGTTGATGACTTTGTGGGTACGTTGATCGACACCGAACGTGCGACAA
1006_chr15:23500000-23550000_Seq_1646_36942-36971	GCGTCGTTATGGTGCAACGTGACTTTGTGGGTACGTTGATtttggctcacaggtcatttgctctttctgtGACTTTGTGGGTACGTTGATGACTTTGTGGGTACGTTGATCGACACCGAACGTGCGACAA
1009_chr15:23500000-23550000_Seq_1649_37002-37031	GCGTCGTTATGGTGCAACGTGACTTTGTGGGTACGTTGATctgcagcccctgtggacagccctaacctctGACTTTGTGGGTACGTTGATGACTTTGTGGGTACGTTGATCGACACCGAACGTGCGACAA
1012_chr15:23500000-23550000_Seq_1654_37102-37131	GCGTCGTTATGGTGCAACGTGACTTTGTGGGTACGTTGATgacccacacacccaaactgaactccacctcGACTTTGTGGGTACGTTGATGACTTTGTGGGTACGTTGATCGACACCGAACGTGCGACAA
1015_chr15:23500000-23550000_Seq_1657_37162-37191	GCGTCGTTATGGTGCAACGTGACTTTGTGGGTACGTTGATccatcttggcttattaccactgtcaacaaaGACTTTGTGGGTACGTTGATGACTTTGTGGGTACGTTGATCGACACCGAACGTGCGACAA
1018_chr15:23500000-23550000_Seq_1661_37243-37272	GCGTCGTTATGGTGCAACGTGACTTTGTGGGTACGTTGATATGGGTGCAGCGGACAGGGTACGTGGTCAGGACTTTGTGGGTACGTTGATGACTTTGTGGGTACGTTGATCGACACCGAACGTGCGACAA
1021_chr15:23500000-23550000_Seq_1664_37303-37332	GCGTCGTTATGGTGCAACGTGACTTTGTGGGTACGTTGATAGTTGCACATCACTTCCCAGCTGGCTCTCCGACTTTGTGGGTACGTTGATGACTTTGTGGGTACGTTGATCGACACCGAACGTGCGACAA
1023_chr15:23500000-23550000_Seq_1666_37343-37372	GCGTCGTTATGGTGCAACGTGACTTTGTGGGTACGTTGATACACCATCCAGATGGTTCTGCTGCTTGCTGGACTTTGTGGGTACGTTGATGACTTTGTGGGTACGTTGATCGACACCGAACGTGCGACAA
1026_chr15:23500000-23550000_Seq_1669_37403-37432	GCGTCGTTATGGTGCAACGTGACTTTGTGGGTACGTTGATTTGTTGCATCTGTCCAGTGTGACCAAGACTGACTTTGTGGGTACGTTGATGACTTTGTGGGTACGTTGATCGACACCGAACGTGCGACAA
1029_chr15:23500000-23550000_Seq_1672_37477-37506	GCGTCGTTATGGTGCAACGTGACTTTGTGGGTACGTTGATGATCTACAAATTGCCAGCCTTAGCACTGCAGACTTTGTGGGTACGTTGATGACTTTGTGGGTACGTTGATCGACACCGAACGTGCGACAA
1032_chr15:23500000-23550000_Seq_1675_37537-37566	GCGTCGTTATGGTGCAACGTGACTTTGTGGGTACGTTGATCTAAATGGGAACTACTGGTCAGAATCAAGGGACTTTGTGGGTACGTTGATGACTTTGTGGGTACGTTGATCGACACCGAACGTGCGACAA
1035_chr15:23500000-23550000_Seq_1678_37597-37626	GCGTCGTTATGGTGCAACGTGACTTTGTGGGTACGTTGATGTCATAAAGTTCTGGGAGAAGAAATTGGCAGACTTTGTGGGTACGTTGATGACTTTGTGGGTACGTTGATCGACACCGAACGTGCGACAA
1038_chr15:23500000-23550000_Seq_1681_37657-37686	GCGTCGTTATGGTGCAACGTGACTTTGTGGGTACGTTGATACAGACACCAGGTGCTTGGCAAAACCTAGAGACTTTGTGGGTACGTTGATGACTTTGTGGGTACGTTGATCGACACCGAACGTGCGACAA
1041_chr15:23500000-23550000_Seq_1684_37717-37746	GCGTCGTTATGGTGCAACGTGACTTTGTGGGTACGTTGATAGCCCAGTGTTGGTGGATGGTGTATTCGCAGACTTTGTGGGTACGTTGATGACTTTGTGGGTACGTTGATCGACACCGAACGTGCGACAA
1044_chr15:23500000-23550000_Seq_1687_37777-37806	GCGTCGTTATGGTGCAACGTGACTTTGTGGGTACGTTGATAATCCATGAACTTCCACAGGCAGTGGTGCTGACTTTGTGGGTACGTTGATGACTTTGTGGGTACGTTGATCGACACCGAACGTGCGACAA
1047_chr15:23500000-23550000_Seq_1690_37837-37866	GCGTCGTTATGGTGCAACGTGACTTTGTGGGTACGTTGATTTTCCTTGCTTCCGTAGCTCCTTGCAGCCTGACTTTGTGGGTACGTTGATGACTTTGTGGGTACGTTGATCGACACCGAACGTGCGACAA
1050_chr15:23500000-23550000_Seq_1693_37897-37926	GCGTCGTTATGGTGCAACGTGACTTTGTGGGTACGTTGATGAGGTGGCTGCCTACAAATGGGGCTGATGGGACTTTGTGGGTACGTTGATGACTTTGTGGGTACGTTGATCGACACCGAACGTGCGACAA
1053_chr15:23500000-23550000_Seq_1696_37957-37986	GCGTCGTTATGGTGCAACGTGACTTTGTGGGTACGTTGATAGGGACCACCTGGGACCCACCAGAAGCTTGGACTTTGTGGGTACGTTGATGACTTTGTGGGTACGTTGATCGACACCGAACGTGCGACAA
1056_chr15:23500000-23550000_Seq_1700_38072-38101	GCGTCGTTATGGTGCAACGTGACTTTGTGGGTACGTTGATAAAAAGAAGAAAAGGGGCTGATAGCTGGGGGACTTTGTGGGTACGTTGATGACTTTGTGGGTACGTTGATCGACACCGAACGTGCGACAA
1059_chr15:23500000-23550000_Seq_1703_38132-38161	GCGTCGTTATGGTGCAACGTGACTTTGTGGGTACGTTGATtttctcttccctcttttatcagccagagacGACTTTGTGGGTACGTTGATGACTTTGTGGGTACGTTGATCGACACCGAACGTGCGACAA
1062_chr15:23500000-23550000_Seq_1706_38194-38223	GCGTCGTTATGGTGCAACGTGACTTTGTGGGTACGTTGATaacctaaaacagaaaacaagacaaacaaacGACTTTGTGGGTACGTTGATGACTTTGTGGGTACGTTGATCGACACCGAACGTGCGACAA
1065_chr15:23500000-23550000_Seq_1709_38287-38316	GCGTCGTTATGGTGCAACGTGACTTTGTGGGTACGTTGATAGTACGGAACAAATACCAGTAAGGCAAATAGACTTTGTGGGTACGTTGATGACTTTGTGGGTACGTTGATCGACACCGAACGTGCGACAA
1068_chr15:23500000-23550000_Seq_1712_38347-38376	GCGTCGTTATGGTGCAACGTGACTTTGTGGGTACGTTGATACAGAGGGGAAAGTAAAAGATCAATGCATAGACTTTGTGGGTACGTTGATGACTTTGTGGGTACGTTGATCGACACCGAACGTGCGACAA
1071_chr15:23500000-23550000_Seq_1716_38540-38569	GCGTCGTTATGGTGCAACGTGACTTTGTGGGTACGTTGATttgtgcctctatgacatagattctaactcaGACTTTGTGGGTACGTTGATGACTTTGTGGGTACGTTGATCGACACCGAACGTGCGACAA
1074_chr15:23500000-23550000_Seq_1719_38644-38673	GCGTCGTTATGGTGCAACGTGACTTTGTGGGTACGTTGATcaatagacactcctgttagtgctttcaaaaGACTTTGTGGGTACGTTGATGACTTTGTGGGTACGTTGATCGACACCGAACGTGCGACAA
1077_chr15:23500000-23550000_Seq_1724_38761-38790	GCGTCGTTATGGTGCAACGTGACTTTGTGGGTACGTTGATattgccccaggcttctaatggaagaaattgGACTTTGTGGGTACGTTGATGACTTTGTGGGTACGTTGATCGACACCGAACGTGCGACAA
1079_chr15:23500000-23550000_Seq_1726_38801-38830	GCGTCGTTATGGTGCAACGTGACTTTGTGGGTACGTTGATcctcgtgctatacaccattaaaacaacaaaGACTTTGTGGGTACGTTGATGACTTTGTGGGTACGTTGATCGACACCGAACGTGCGACAA
1082_chr15:23500000-23550000_Seq_1730_38881-38910	GCGTCGTTATGGTGCAACGTGACTTTGTGGGTACGTTGATcttccacatccagctgcccattatcctttgGACTTTGTGGGTACGTTGATGACTTTGTGGGTACGTTGATCGACACCGAACGTGCGACAA
1085_chr15:23500000-23550000_Seq_1733_38941-38970	GCGTCGTTATGGTGCAACGTGACTTTGTGGGTACGTTGATatggctacagaggcctcctaaagagagggtGACTTTGTGGGTACGTTGATGACTTTGTGGGTACGTTGATCGACACCGAACGTGCGACAA
1088_chr15:23500000-23550000_Seq_1738_39041-39070	GCGTCGTTATGGTGCAACGTGACTTTGTGGGTACGTTGATcagatgccagggtattagatatggctatccGACTTTGTGGGTACGTTGATGACTTTGTGGGTACGTTGATCGACACCGAACGTGCGACAA
1091_chr15:23500000-23550000_Seq_1742_39121-39150	GCGTCGTTATGGTGCAACGTGACTTTGTGGGTACGTTGATgaatagcaatggaagtttgtacactaggcaGACTTTGTGGGTACGTTGATGACTTTGTGGGTACGTTGATCGACACCGAACGTGCGACAA
1094_chr15:23500000-23550000_Seq_1745_39181-39210	GCGTCGTTATGGTGCAACGTGACTTTGTGGGTACGTTGATggctaaggggagagctgctgcttcccatccGACTTTGTGGGTACGTTGATGACTTTGTGGGTACGTTGATCGACACCGAACGTGCGACAA
1097_chr15:23500000-23550000_Seq_1751_39301-39330	GCGTCGTTATGGTGCAACGTGACTTTGTGGGTACGTTGATcgaagtgatgaccccatcctcatgtttatcGACTTTGTGGGTACGTTGATGACTTTGTGGGTACGTTGATCGACACCGAACGTGCGACAA
1100_chr15:23500000-23550000_Seq_1755_39410-39439	GCGTCGTTATGGTGCAACGTGACTTTGTGGGTACGTTGATatcttttgcctgatggacacccaaaatataGACTTTGTGGGTACGTTGATGACTTTGTGGGTACGTTGATCGACACCGAACGTGCGACAA
1103_chr15:23500000-23550000_Seq_1758_39480-39509	GCGTCGTTATGGTGCAACGTGACTTTGTGGGTACGTTGATaaaactttgccaggacatccctttttccctGACTTTGTGGGTACGTTGATGACTTTGTGGGTACGTTGATCGACACCGAACGTGCGACAA
1106_chr15:23500000-23550000_Seq_1761_39540-39569	GCGTCGTTATGGTGCAACGTGACTTTGTGGGTACGTTGATaagacacacatagcacttcttagaacacacGACTTTGTGGGTACGTTGATGACTTTGTGGGTACGTTGATCGACACCGAACGTGCGACAA
1109_chr15:23500000-23550000_Seq_1765_39620-39649	GCGTCGTTATGGTGCAACGTGACTTTGTGGGTACGTTGATacgaaccagtaactgctttaactgagagacGACTTTGTGGGTACGTTGATGACTTTGTGGGTACGTTGATCGACACCGAACGTGCGACAA
1112_chr15:23500000-23550000_Seq_1771_39740-39769	GCGTCGTTATGGTGCAACGTGACTTTGTGGGTACGTTGATatcattatacatttttgatcttgtccctgtGACTTTGTGGGTACGTTGATGACTTTGTGGGTACGTTGATCGACACCGAACGTGCGACAA
1115_chr15:23500000-23550000_Seq_1774_39800-39829	GCGTCGTTATGGTGCAACGTGACTTTGTGGGTACGTTGATacattctctcctaggaatgattaaccatagGACTTTGTGGGTACGTTGATGACTTTGTGGGTACGTTGATCGACACCGAACGTGCGACAA
1118_chr15:23500000-23550000_Seq_1779_39900-39929	GCGTCGTTATGGTGCAACGTGACTTTGTGGGTACGTTGATccctgttgggtgcaactatacaccattctaGACTTTGTGGGTACGTTGATGACTTTGTGGGTACGTTGATCGACACCGAACGTGCGACAA
1121_chr15:23500000-23550000_Seq_1783_39980-40009	GCGTCGTTATGGTGCAACGTGACTTTGTGGGTACGTTGATatctggtgacccgactgtgaaccaagtaagGACTTTGTGGGTACGTTGATGACTTTGTGGGTACGTTGATCGACACCGAACGTGCGACAA
1124_chr15:23500000-23550000_Seq_1788_40080-40109	GCGTCGTTATGGTGCAACGTGACTTTGTGGGTACGTTGATaccctggcccaaaatcccacccctgatgacGACTTTGTGGGTACGTTGATGACTTTGTGGGTACGTTGATCGACACCGAACGTGCGACAA
1127_chr15:23500000-23550000_Seq_1791_40140-40169	GCGTCGTTATGGTGCAACGTGACTTTGTGGGTACGTTGATcaaagaccctgtcattgcagatgacttcgcGACTTTGTGGGTACGTTGATGACTTTGTGGGTACGTTGATCGACACCGAACGTGCGACAA
1130_chr15:23500000-23550000_Seq_1794_40200-40229	GCGTCGTTATGGTGCAACGTGACTTTGTGGGTACGTTGATtaaaaactctgccccaccaacacctatgggGACTTTGTGGGTACGTTGATGACTTTGTGGGTACGTTGATCGACACCGAACGTGCGACAA
1133_chr15:23500000-23550000_Seq_1798_40280-40309	GCGTCGTTATGGTGCAACGTGACTTTGTGGGTACGTTGATcctggactcactctctgcttagccaatgatGACTTTGTGGGTACGTTGATGACTTTGTGGGTACGTTGATCGACACCGAACGTGCGACAA
1135_chr15:23500000-23550000_Seq_1800_40320-40349	GCGTCGTTATGGTGCAACGTGACTTTGTGGGTACGTTGATtccttgctgtctgctcacatgtccacccatGACTTTGTGGGTACGTTGATGACTTTGTGGGTACGTTGATCGACACCGAACGTGCGACAA
1138_chr15:23500000-23550000_Seq_1803_40380-40409	GCGTCGTTATGGTGCAACGTGACTTTGTGGGTACGTTGATctaaaatcaatgagattatttcttccccctGACTTTGTGGGTACGTTGATGACTTTGTGGGTACGTTGATCGACACCGAACGTGCGACAA
1141_chr15:23500000-23550000_Seq_1806_40440-40469	GCGTCGTTATGGTGCAACGTGACTTTGTGGGTACGTTGATcctgggagagaggaccatccactccatgatGACTTTGTGGGTACGTTGATGACTTTGTGGGTACGTTGATCGACACCGAACGTGCGACAA
1144_chr15:23500000-23550000_Seq_1809_40500-40529	GCGTCGTTATGGTGCAACGTGACTTTGTGGGTACGTTGATccacaatctctcaatttgcatatccaaacaGACTTTGTGGGTACGTTGATGACTTTGTGGGTACGTTGATCGACACCGAACGTGCGACAA
1147_chr15:23500000-23550000_Seq_1812_40560-40589	GCGTCGTTATGGTGCAACGTGACTTTGTGGGTACGTTGATtgccccttggtttcatgtaatgctactaatGACTTTGTGGGTACGTTGATGACTTTGTGGGTACGTTGATCGACACCGAACGTGCGACAA
1150_chr15:23500000-23550000_Seq_1815_40653-40682	GCGTCGTTATGGTGCAACGTGACTTTGTGGGTACGTTGATTAAATTGTTTGTTAAATGATACTGTTCCCCGACTTTGTGGGTACGTTGATGACTTTGTGGGTACGTTGATCGACACCGAACGTGCGACAA
1153_chr15:23500000-23550000_Seq_1818_40713-40742	GCGTCGTTATGGTGCAACGTGACTTTGTGGGTACGTTGATTAACTGTCTTACATTCAGAAGGTGATTCCAGACTTTGTGGGTACGTTGATGACTTTGTGGGTACGTTGATCGACACCGAACGTGCGACAA
1156_chr15:23500000-23550000_Seq_1821_40801-40830	GCGTCGTTATGGTGCAACGTGACTTTGTGGGTACGTTGATtttgacttcccttttcaggcctgacagaagGACTTTGTGGGTACGTTGATGACTTTGTGGGTACGTTGATCGACACCGAACGTGCGACAA
1159_chr15:23500000-23550000_Seq_1825_40881-40910	GCGTCGTTATGGTGCAACGTGACTTTGTGGGTACGTTGATgtcctccttctgcggctgcttaacccacttGACTTTGTGGGTACGTTGATGACTTTGTGGGTACGTTGATCGACACCGAACGTGCGACAA
1162_chr15:23500000-23550000_Seq_1828_40941-40970	GCGTCGTTATGGTGCAACGTGACTTTGTGGGTACGTTGATaccccaaagctgctgaccatgagcaaacctGACTTTGTGGGTACGTTGATGACTTTGTGGGTACGTTGATCGACACCGAACGTGCGACAA
1165_chr15:23500000-23550000_Seq_1832_41021-41050	GCGTCGTTATGGTGCAACGTGACTTTGTGGGTACGTTGATactttaaactccccagtccgcaactccagcGACTTTGTGGGTACGTTGATGACTTTGTGGGTACGTTGATCGACACCGAACGTGCGACAA
1168_chr15:23500000-23550000_Seq_1836_41101-41130	GCGTCGTTATGGTGCAACGTGACTTTGTGGGTACGTTGATccctcctcctctcccccaactctccacacaGACTTTGTGGGTACGTTGATGACTTTGTGGGTACGTTGATCGACACCGAACGTGCGACAA
1171_chr15:23500000-23550000_Seq_1839_41161-41190	GCGTCGTTATGGTGCAACGTGACTTTGTGGGTACGTTGATcctatcagcgcccccagaagcactcccgacGACTTTGTGGGTACGTTGATGACTTTGTGGGTACGTTGATCGACACCGAACGTGCGACAA
1174_chr15:23500000-23550000_Seq_1843_41241-41270	GCGTCGTTATGGTGCAACGTGACTTTGTGGGTACGTTGATtgaccaacacatcgaagcctaatgttccccGACTTTGTGGGTACGTTGATGACTTTGTGGGTACGTTGATCGACACCGAACGTGCGACAA
1177_chr15:23500000-23550000_Seq_1848_41341-41370	GCGTCGTTATGGTGCAACGTGACTTTGTGGGTACGTTGATaaagaaaccataaATTATccgggcatggtgGACTTTGTGGGTACGTTGATGACTTTGTGGGTACGTTGATCGACACCGAACGTGCGACAA
1180_chr15:23500000-23550000_Seq_1857_41595-41624	GCGTCGTTATGGTGCAACGTGACTTTGTGGGTACGTTGATaggcacaatggattatgaactccctttctaGACTTTGTGGGTACGTTGATGACTTTGTGGGTACGTTGATCGACACCGAACGTGCGACAA
1183_chr15:23500000-23550000_Seq_1860_41655-41684	GCGTCGTTATGGTGCAACGTGACTTTGTGGGTACGTTGATgagcgtggggccgggggtaggtggaactgaGACTTTGTGGGTACGTTGATGACTTTGTGGGTACGTTGATCGACACCGAACGTGCGACAA
1186_chr15:23500000-23550000_Seq_1864_41735-41764	GCGTCGTTATGGTGCAACGTGACTTTGTGGGTACGTTGATagccccatctaggatcccaccaacgatcacGACTTTGTGGGTACGTTGATGACTTTGTGGGTACGTTGATCGACACCGAACGTGCGACAA
1189_chr15:23500000-23550000_Seq_1869_41835-41864	GCGTCGTTATGGTGCAACGTGACTTTGTGGGTACGTTGATttttaccactcaggaaattacagaggttttGACTTTGTGGGTACGTTGATGACTTTGTGGGTACGTTGATCGACACCGAACGTGCGACAA
1191_chr15:23500000-23550000_Seq_1872_41895-41924	GCGTCGTTATGGTGCAACGTGACTTTGTGGGTACGTTGATgaccaaatattaaacagaagcttttcgtagGACTTTGTGGGTACGTTGATGACTTTGTGGGTACGTTGATCGACACCGAACGTGCGACAA
1194_chr15:23500000-23550000_Seq_1877_42056-42085	GCGTCGTTATGGTGCAACGTGACTTTGTGGGTACGTTGATgtacatacattatagatatGAAACATCAGCGACTTTGTGGGTACGTTGATGACTTTGTGGGTACGTTGATCGACACCGAACGTGCGACAA
1197_chr15:23500000-23550000_Seq_1880_42133-42162	GCGTCGTTATGGTGCAACGTGACTTTGTGGGTACGTTGATGTTAAAGCTGTAACTGCAGTGGTCCTGTAAGACTTTGTGGGTACGTTGATGACTTTGTGGGTACGTTGATCGACACCGAACGTGCGACAA
1200_chr15:23500000-23550000_Seq_1885_42300-42329	GCGTCGTTATGGTGCAACGTGACTTTGTGGGTACGTTGATtttttagcatgtatgtgttaccattaccatGACTTTGTGGGTACGTTGATGACTTTGTGGGTACGTTGATCGACACCGAACGTGCGACAA
1203_chr15:23500000-23550000_Seq_1888_42373-42402	GCGTCGTTATGGTGCAACGTGACTTTGTGGGTACGTTGATtattctttacctatcatcctcttgttccccGACTTTGTGGGTACGTTGATGACTTTGTGGGTACGTTGATCGACACCGAACGTGCGACAA
1206_chr15:23500000-23550000_Seq_1891_42433-42462	GCGTCGTTATGGTGCAACGTGACTTTGTGGGTACGTTGATtctactttttgtctttatagatttccctacGACTTTGTGGGTACGTTGATGACTTTGTGGGTACGTTGATCGACACCGAACGTGCGACAA
1209_chr15:23500000-23550000_Seq_1896_42549-42578	GCGTCGTTATGGTGCAACGTGACTTTGTGGGTACGTTGATataattcatcctatatccatacttctatccGACTTTGTGGGTACGTTGATGACTTTGTGGGTACGTTGATCGACACCGAACGTGCGACAA
1212_chr15:23500000-23550000_Seq_1902_42706-42735	GCGTCGTTATGGTGCAACGTGACTTTGTGGGTACGTTGATgttttgtttctctactcctaggagtagaatGACTTTGTGGGTACGTTGATGACTTTGTGGGTACGTTGATCGACACCGAACGTGCGACAA
1215_chr15:23500000-23550000_Seq_1905_42784-42813	GCGTCGTTATGGTGCAACGTGACTTTGTGGGTACGTTGATtttttccaaggtggcagtagtatcttacatGACTTTGTGGGTACGTTGATGACTTTGTGGGTACGTTGATCGACACCGAACGTGCGACAA
1218_chr15:23500000-23550000_Seq_1908_42844-42873	GCGTCGTTATGGTGCAACGTGACTTTGTGGGTACGTTGATtccccacattcttctcacacttgttatctgGACTTTGTGGGTACGTTGATGACTTTGTGGGTACGTTGATCGACACCGAACGTGCGACAA
1221_chr15:23500000-23550000_Seq_1911_42917-42946	GCGTCGTTATGGTGCAACGTGACTTTGTGGGTACGTTGATcactgaggtttccatttgcattttcttgatGACTTTGTGGGTACGTTGATGACTTTGTGGGTACGTTGATCGACACCGAACGTGCGACAA
1224_chr15:23500000-23550000_Seq_1915_43007-43036	GCGTCGTTATGGTGCAACGTGACTTTGTGGGTACGTTGATcagatgcctattcaaatcctttgtccatttGACTTTGTGGGTACGTTGATGACTTTGTGGGTACGTTGATCGACACCGAACGTGCGACAA
1227_chr15:23500000-23550000_Seq_1918_43083-43112	GCGTCGTTATGGTGCAACGTGACTTTGTGGGTACGTTGATatactctcagtacaatgtgttatcaattgtGACTTTGTGGGTACGTTGATGACTTTGTGGGTACGTTGATCGACACCGAACGTGCGACAA
1230_chr15:23500000-23550000_Seq_1921_43143-43172	GCGTCGTTATGGTGCAACGTGACTTTGTGGGTACGTTGATtcttgctttttcactcctatatggtgtcatGACTTTGTGGGTACGTTGATGACTTTGTGGGTACGTTGATCGACACCGAACGTGCGACAA
1233_chr15:23500000-23550000_Seq_1924_43226-43255	GCGTCGTTATGGTGCAACGTGACTTTGTGGGTACGTTGATtttgtttctcctgcctttgttgtcagagtcGACTTTGTGGGTACGTTGATGACTTTGTGGGTACGTTGATCGACACCGAACGTGCGACAA
1236_chr15:23500000-23550000_Seq_1927_43286-43315	GCGTCGTTATGGTGCAACGTGACTTTGTGGGTACGTTGATagatataccctgtgttttcttctaggagatGACTTTGTGGGTACGTTGATGACTTTGTGGGTACGTTGATCGACACCGAACGTGCGACAA
1239_chr15:23500000-23550000_Seq_1931_43374-43403	GCGTCGTTATGGTGCAACGTGACTTTGTGGGTACGTTGATataatggtgcagctttacttgccctagcacGACTTTGTGGGTACGTTGATGACTTTGTGGGTACGTTGATCGACACCGAACGTGCGACAA
1242_chr15:23500000-23550000_Seq_1934_43434-43463	GCGTCGTTATGGTGCAACGTGACTTTGTGGGTACGTTGATtggttttggctcttgtcaaacaccaattgaGACTTTGTGGGTACGTTGATGACTTTGTGGGTACGTTGATCGACACCGAACGTGCGACAA
1245_chr15:23500000-23550000_Seq_1937_43494-43523	GCGTCGTTATGGTGCAACGTGACTTTGTGGGTACGTTGATctcaattctattacattgctctatatgtctGACTTTGTGGGTACGTTGATGACTTTGTGGGTACGTTGATCGACACCGAACGTGCGACAA
1248_chr15:23500000-23550000_Seq_1940_43566-43595	GCGTCGTTATGGTGCAACGTGACTTTGTGGGTACGTTGATatactaagttttgaaatcagaaagtgcaagGACTTTGTGGGTACGTTGATGACTTTGTGGGTACGTTGATCGACACCGAACGTGCGACAA
1250_chr15:23500000-23550000_Seq_1942_43606-43635	GCGTCGTTATGGTGCAACGTGACTTTGTGGGTACGTTGATctgcttattttcaagattgttttggctattGACTTTGTGGGTACGTTGATGACTTTGTGGGTACGTTGATCGACACCGAACGTGCGACAA
1253_chr15:23500000-23550000_Seq_1945_43667-43696	GCGTCGTTATGGTGCAACGTGACTTTGTGGGTACGTTGATagaatcaacttgtacatttctacaaagaagGACTTTGTGGGTACGTTGATGACTTTGTGGGTACGTTGATCGACACCGAACGTGCGACAA
1256_chr15:23500000-23550000_Seq_1948_43727-43756	GCGTCGTTATGGTGCAACGTGACTTTGTGGGTACGTTGATaattagcacatctattcgggaagtgttgccGACTTTGTGGGTACGTTGATGACTTTGTGGGTACGTTGATCGACACCGAACGTGCGACAA
1259_chr15:23500000-23550000_Seq_1951_43829-43858	GCGTCGTTATGGTGCAACGTGACTTTGTGGGTACGTTGATccacagtgttttataattttcaaagcaaacGACTTTGTGGGTACGTTGATGACTTTGTGGGTACGTTGATCGACACCGAACGTGCGACAA
1262_chr15:23500000-23550000_Seq_1957_43974-44003	GCGTCGTTATGGTGCAACGTGACTTTGTGGGTACGTTGATtgggttcaagtgatttatgctgcctcagccGACTTTGTGGGTACGTTGATGACTTTGTGGGTACGTTGATCGACACCGAACGTGCGACAA
1265_chr15:23500000-23550000_Seq_1969_44215-44244	GCGTCGTTATGGTGCAACGTGACTTTGTGGGTACGTTGATtcattgcaagtgtatagaagttcaattgatGACTTTGTGGGTACGTTGATGACTTTGTGGGTACGTTGATCGACACCGAACGTGCGACAA
1268_chr15:23500000-23550000_Seq_1973_44305-44334	GCGTCGTTATGGTGCAACGTGACTTTGTGGGTACGTTGATtttttggtggatgccttaggaatttctataGACTTTGTGGGTACGTTGATGACTTTGTGGGTACGTTGATCGACACCGAACGTGCGACAA
1271_chr15:23500000-23550000_Seq_1976_44366-44395	GCGTCGTTATGGTGCAACGTGACTTTGTGGGTACGTTGATattttactttttccttttcaaactggaagcGACTTTGTGGGTACGTTGATGACTTTGTGGGTACGTTGATCGACACCGAACGTGCGACAA
1274_chr15:23500000-23550000_Seq_1980_44474-44503	GCGTCGTTATGGTGCAACGTGACTTTGTGGGTACGTTGATcatcctcctcttattcctgatattatggggGACTTTGTGGGTACGTTGATGACTTTGTGGGTACGTTGATCGACACCGAACGTGCGACAA
1277_chr15:23500000-23550000_Seq_1983_44549-44578	GCGTCGTTATGGTGCAACGTGACTTTGTGGGTACGTTGATcttttcactgattgtttttatcaggttgagGACTTTGTGGGTACGTTGATGACTTTGTGGGTACGTTGATCGACACCGAACGTGCGACAA
1280_chr15:23500000-23550000_Seq_1988_44668-44697	GCGTCGTTATGGTGCAACGTGACTTTGTGGGTACGTTGATatgGTGGtacagggcaggccagcaggctgcGACTTTGTGGGTACGTTGATGACTTTGTGGGTACGTTGATCGACACCGAACGTGCGACAA
1283_chr15:23500000-23550000_Seq_1991_44728-44757	GCGTCGTTATGGTGCAACGTGACTTTGTGGGTACGTTGATgagcctgaggacagtcagaaagcaggattcGACTTTGTGGGTACGTTGATGACTTTGTGGGTACGTTGATCGACACCGAACGTGCGACAA
1286_chr15:23500000-23550000_Seq_1994_44791-44820	GCGTCGTTATGGTGCAACGTGACTTTGTGGGTACGTTGATaagatctttaaataattggatgaggatgagGACTTTGTGGGTACGTTGATGACTTTGTGGGTACGTTGATCGACACCGAACGTGCGACAA
1289_chr15:23500000-23550000_Seq_1997_44851-44880	GCGTCGTTATGGTGCAACGTGACTTTGTGGGTACGTTGATttattcaaagcctactcttttcagtgttaaGACTTTGTGGGTACGTTGATGACTTTGTGGGTACGTTGATCGACACCGAACGTGCGACAA
1292_chr15:23500000-23550000_Seq_2012_45216-45245	GCGTCGTTATGGTGCAACGTGACTTTGTGGGTACGTTGATATATCACATTGTATATGATAAGGGGATATGGACTTTGTGGGTACGTTGATGACTTTGTGGGTACGTTGATCGACACCGAACGTGCGACAA
1295_chr15:23500000-23550000_Seq_2015_45389-45418	GCGTCGTTATGGTGCAACGTGACTTTGTGGGTACGTTGATTGTGTTTCTGTAAATGGTCATGTGTTCATAGACTTTGTGGGTACGTTGATGACTTTGTGGGTACGTTGATCGACACCGAACGTGCGACAA
1298_chr15:23500000-23550000_Seq_2018_45449-45478	GCGTCGTTATGGTGCAACGTGACTTTGTGGGTACGTTGATATTCCTTAGTCCTGTGCTCTCAGCAGGTTAGACTTTGTGGGTACGTTGATGACTTTGTGGGTACGTTGATCGACACCGAACGTGCGACAA
1301_chr15:23500000-23550000_Seq_2021_45517-45546	GCGTCGTTATGGTGCAACGTGACTTTGTGGGTACGTTGATTTTTTATCTGGTAGAGTAACTAGTCCTGTgGACTTTGTGGGTACGTTGATGACTTTGTGGGTACGTTGATCGACACCGAACGTGCGACAA
1304_chr15:23500000-23550000_Seq_2024_45577-45606	GCGTCGTTATGGTGCAACGTGACTTTGTGGGTACGTTGATagaataactcaaagcttcactcctgtagggGACTTTGTGGGTACGTTGATGACTTTGTGGGTACGTTGATCGACACCGAACGTGCGACAA
1306_chr15:23500000-23550000_Seq_2028_45664-45693	GCGTCGTTATGGTGCAACGTGACTTTGTGGGTACGTTGATatcaaagggcatggtagcattaagagatacGACTTTGTGGGTACGTTGATGACTTTGTGGGTACGTTGATCGACACCGAACGTGCGACAA
1309_chr15:23500000-23550000_Seq_2031_45727-45756	GCGTCGTTATGGTGCAACGTGACTTTGTGGGTACGTTGATatactcttccaaaacctccactatggagtgGACTTTGTGGGTACGTTGATGACTTTGTGGGTACGTTGATCGACACCGAACGTGCGACAA
1312_chr15:23500000-23550000_Seq_2034_45787-45816	GCGTCGTTATGGTGCAACGTGACTTTGTGGGTACGTTGATcagtaacctcagagtgcaggtctcctttctGACTTTGTGGGTACGTTGATGACTTTGTGGGTACGTTGATCGACACCGAACGTGCGACAA
1315_chr15:23500000-23550000_Seq_2037_45847-45876	GCGTCGTTATGGTGCAACGTGACTTTGTGGGTACGTTGATaaagtagccaagtgtcaatcataattttcaGACTTTGTGGGTACGTTGATGACTTTGTGGGTACGTTGATCGACACCGAACGTGCGACAA
1318_chr15:23500000-23550000_Seq_2041_45933-45962	GCGTCGTTATGGTGCAACGTGACTTTGTGGGTACGTTGATccttcaggtcagcaaagcataaggtcatgaGACTTTGTGGGTACGTTGATGACTTTGTGGGTACGTTGATCGACACCGAACGTGCGACAA
1321_chr15:23500000-23550000_Seq_2045_46035-46064	GCGTCGTTATGGTGCAACGTGACTTTGTGGGTACGTTGATtttgattgctggactcatgtaccccggctaGACTTTGTGGGTACGTTGATGACTTTGTGGGTACGTTGATCGACACCGAACGTGCGACAA
1324_chr15:23500000-23550000_Seq_2049_46115-46144	GCGTCGTTATGGTGCAACGTGACTTTGTGGGTACGTTGATccctggagaaccttgctccagcacctcaagGACTTTGTGGGTACGTTGATGACTTTGTGGGTACGTTGATCGACACCGAACGTGCGACAA
1327_chr15:23500000-23550000_Seq_2052_46175-46204	GCGTCGTTATGGTGCAACGTGACTTTGTGGGTACGTTGATgaattgaaaaggccattccagttttctatcGACTTTGTGGGTACGTTGATGACTTTGTGGGTACGTTGATCGACACCGAACGTGCGACAA
1330_chr15:23500000-23550000_Seq_2055_46235-46264	GCGTCGTTATGGTGCAACGTGACTTTGTGGGTACGTTGATagtaagaccaataaactccatgcacatagaGACTTTGTGGGTACGTTGATGACTTTGTGGGTACGTTGATCGACACCGAACGTGCGACAA
1333_chr15:23500000-23550000_Seq_2058_46295-46324	GCGTCGTTATGGTGCAACGTGACTTTGTGGGTACGTTGATgacttccttgaccagaagaaatgctctggaGACTTTGTGGGTACGTTGATGACTTTGTGGGTACGTTGATCGACACCGAACGTGCGACAA
1336_chr15:23500000-23550000_Seq_2065_46435-46464	GCGTCGTTATGGTGCAACGTGACTTTGTGGGTACGTTGATtaagaacaaaacactagcccttccatgaggGACTTTGTGGGTACGTTGATGACTTTGTGGGTACGTTGATCGACACCGAACGTGCGACAA
1339_chr15:23500000-23550000_Seq_2069_46515-46544	GCGTCGTTATGGTGCAACGTGACTTTGTGGGTACGTTGATcagaaagtggtgccatatcagggactaagtGACTTTGTGGGTACGTTGATGACTTTGTGGGTACGTTGATCGACACCGAACGTGCGACAA
1342_chr15:23500000-23550000_Seq_2072_46575-46604	GCGTCGTTATGGTGCAACGTGACTTTGTGGGTACGTTGATgggtgaactggccaaaattctgcccacagaGACTTTGTGGGTACGTTGATGACTTTGTGGGTACGTTGATCGACACCGAACGTGCGACAA
1345_chr15:23500000-23550000_Seq_2076_46664-46693	GCGTCGTTATGGTGCAACGTGACTTTGTGGGTACGTTGATcagatgtctatttttgggggtagttgcataGACTTTGTGGGTACGTTGATGACTTTGTGGGTACGTTGATCGACACCGAACGTGCGACAA
1348_chr15:23500000-23550000_Seq_2079_46724-46753	GCGTCGTTATGGTGCAACGTGACTTTGTGGGTACGTTGATagacttatcaacctctgtctactgattataGACTTTGTGGGTACGTTGATGACTTTGTGGGTACGTTGATCGACACCGAACGTGCGACAA
1351_chr15:23500000-23550000_Seq_2083_46804-46833	GCGTCGTTATGGTGCAACGTGACTTTGTGGGTACGTTGATagtgcagcagaagtgtggtccatgggcattGACTTTGTGGGTACGTTGATGACTTTGTGGGTACGTTGATCGACACCGAACGTGCGACAA
1354_chr15:23500000-23550000_Seq_2087_46884-46913	GCGTCGTTATGGTGCAACGTGACTTTGTGGGTACGTTGATccgatcagatatgtgctacttccaattgatGACTTTGTGGGTACGTTGATGACTTTGTGGGTACGTTGATCGACACCGAACGTGCGACAA
1357_chr15:23500000-23550000_Seq_2090_46944-46973	GCGTCGTTATGGTGCAACGTGACTTTGTGGGTACGTTGATacttgttggtcagattacacatgggcagcaGACTTTGTGGGTACGTTGATGACTTTGTGGGTACGTTGATCGACACCGAACGTGCGACAA
1360_chr15:23500000-23550000_Seq_2093_47004-47033	GCGTCGTTATGGTGCAACGTGACTTTGTGGGTACGTTGATtaagcattcagtctcagctaagaccccatgGACTTTGTGGGTACGTTGATGACTTTGTGGGTACGTTGATCGACACCGAACGTGCGACAA
1362_chr15:23500000-23550000_Seq_2095_47044-47073	GCGTCGTTATGGTGCAACGTGACTTTGTGGGTACGTTGATagccatttctcaaaagagagcagtaacctgGACTTTGTGGGTACGTTGATGACTTTGTGGGTACGTTGATCGACACCGAACGTGCGACAA
1365_chr15:23500000-23550000_Seq_2099_47124-47153	GCGTCGTTATGGTGCAACGTGACTTTGTGGGTACGTTGATtcgcgtgtagaggcctgctgcagacaccaaGACTTTGTGGGTACGTTGATGACTTTGTGGGTACGTTGATCGACACCGAACGTGCGACAA
1368_chr15:23500000-23550000_Seq_2103_47204-47233	GCGTCGTTATGGTGCAACGTGACTTTGTGGGTACGTTGATatcatatggtctgagcagccaagcagcttgGACTTTGTGGGTACGTTGATGACTTTGTGGGTACGTTGATCGACACCGAACGTGCGACAA
1371_chr15:23500000-23550000_Seq_2108_47304-47333	GCGTCGTTATGGTGCAACGTGACTTTGTGGGTACGTTGATtgtcactctgtaaatgggctgtacaaacacGACTTTGTGGGTACGTTGATGACTTTGTGGGTACGTTGATCGACACCGAACGTGCGACAA
1374_chr15:23500000-23550000_Seq_2111_47366-47395	GCGTCGTTATGGTGCAACGTGACTTTGTGGGTACGTTGATcaaggagcccagtcaatgttgtgcctctttGACTTTGTGGGTACGTTGATGACTTTGTGGGTACGTTGATCGACACCGAACGTGCGACAA
1377_chr15:23500000-23550000_Seq_2115_47456-47485	GCGTCGTTATGGTGCAACGTGACTTTGTGGGTACGTTGATgggacatctcaacatgacccacaacactgaGACTTTGTGGGTACGTTGATGACTTTGTGGGTACGTTGATCGACACCGAACGTGCGACAA
1380_chr15:23500000-23550000_Seq_2119_47536-47565	GCGTCGTTATGGTGCAACGTGACTTTGTGGGTACGTTGATttcactcctctctgactgcaaatgtcttatGACTTTGTGGGTACGTTGATGACTTTGTGGGTACGTTGATCGACACCGAACGTGCGACAA
1383_chr15:23500000-23550000_Seq_2125_47656-47685	GCGTCGTTATGGTGCAACGTGACTTTGTGGGTACGTTGATaagggaatgattatcaagatccctgaaaacGACTTTGTGGGTACGTTGATGACTTTGTGGGTACGTTGATCGACACCGAACGTGCGACAA
1386_chr15:23500000-23550000_Seq_2129_47736-47765	GCGTCGTTATGGTGCAACGTGACTTTGTGGGTACGTTGATtaagagtgtatcactaaccttgacagctgaGACTTTGTGGGTACGTTGATGACTTTGTGGGTACGTTGATCGACACCGAACGTGCGACAA
1389_chr15:23500000-23550000_Seq_2132_47801-47830	GCGTCGTTATGGTGCAACGTGACTTTGTGGGTACGTTGATttaaatcagctcccaatctttaaaattgtgGACTTTGTGGGTACGTTGATGACTTTGTGGGTACGTTGATCGACACCGAACGTGCGACAA
1392_chr15:23500000-23550000_Seq_2135_47878-47907	GCGTCGTTATGGTGCAACGTGACTTTGTGGGTACGTTGATactggcactcctgagcccaaattctcatatGACTTTGTGGGTACGTTGATGACTTTGTGGGTACGTTGATCGACACCGAACGTGCGACAA
1395_chr15:23500000-23550000_Seq_2138_47938-47967	GCGTCGTTATGGTGCAACGTGACTTTGTGGGTACGTTGATtgcccttttcagacttggacagatccttccGACTTTGTGGGTACGTTGATGACTTTGTGGGTACGTTGATCGACACCGAACGTGCGACAA
1398_chr15:23500000-23550000_Seq_2141_48023-48052	GCGTCGTTATGGTGCAACGTGACTTTGTGGGTACGTTGATTTTTTCTACCCTACTAGCACTTTGAAGTTTGACTTTGTGGGTACGTTGATGACTTTGTGGGTACGTTGATCGACACCGAACGTGCGACAA
1401_chr15:23500000-23550000_Seq_2145_48114-48143	GCGTCGTTATGGTGCAACGTGACTTTGTGGGTACGTTGATccttactgaacctgaagagataccccaaccGACTTTGTGGGTACGTTGATGACTTTGTGGGTACGTTGATCGACACCGAACGTGCGACAA
1404_chr15:23500000-23550000_Seq_2148_48184-48213	GCGTCGTTATGGTGCAACGTGACTTTGTGGGTACGTTGATattttcctacgtaaactaaccaatccaaagGACTTTGTGGGTACGTTGATGACTTTGTGGGTACGTTGATCGACACCGAACGTGCGACAA
1407_chr15:23500000-23550000_Seq_2151_48244-48273	GCGTCGTTATGGTGCAACGTGACTTTGTGGGTACGTTGATtacagaagccacaatgaagtctattgtccaGACTTTGTGGGTACGTTGATGACTTTGTGGGTACGTTGATCGACACCGAACGTGCGACAA
1410_chr15:23500000-23550000_Seq_2154_48304-48333	GCGTCGTTATGGTGCAACGTGACTTTGTGGGTACGTTGATttgtccctggCACAGCTGCTATTTGGGCATGACTTTGTGGGTACGTTGATGACTTTGTGGGTACGTTGATCGACACCGAACGTGCGACAA
1413_chr15:23500000-23550000_Seq_2157_48364-48393	GCGTCGTTATGGTGCAACGTGACTTTGTGGGTACGTTGATATTCGAAACTAGAAAGCTGAGTGCTCCTGAGACTTTGTGGGTACGTTGATGACTTTGTGGGTACGTTGATCGACACCGAACGTGCGACAA
1416_chr15:23500000-23550000_Seq_2160_48424-48453	GCGTCGTTATGGTGCAACGTGACTTTGTGGGTACGTTGATTTCTGGGATAAGGAACACTCTTCtgtttttGACTTTGTGGGTACGTTGATGACTTTGTGGGTACGTTGATCGACACCGAACGTGCGACAA
1418_chr15:23500000-23550000_Seq_2163_48521-48550	GCGTCGTTATGGTGCAACGTGACTTTGTGGGTACGTTGATtgttggccaccttgttctcaaattcctggcGACTTTGTGGGTACGTTGATGACTTTGTGGGTACGTTGATCGACACCGAACGTGCGACAA
1421_chr15:23500000-23550000_Seq_2167_48601-48630	GCGTCGTTATGGTGCAACGTGACTTTGTGGGTACGTTGATgggagccaccacgtcctgcctcctagttttGACTTTGTGGGTACGTTGATGACTTTGTGGGTACGTTGATCGACACCGAACGTGCGACAA
1424_chr15:23500000-23550000_Seq_2170_48661-48690	GCGTCGTTATGGTGCAACGTGACTTTGTGGGTACGTTGATACCAGAGGGGACCAGGTGTGACTTTCCTCCGACTTTGTGGGTACGTTGATGACTTTGTGGGTACGTTGATCGACACCGAACGTGCGACAA
1427_chr15:23500000-23550000_Seq_2173_48721-48750	GCGTCGTTATGGTGCAACGTGACTTTGTGGGTACGTTGATACAGGCAGCACAGATTAATATTGAGACAAGGACTTTGTGGGTACGTTGATGACTTTGTGGGTACGTTGATCGACACCGAACGTGCGACAA
1430_chr15:23500000-23550000_Seq_2176_48781-48810	GCGTCGTTATGGTGCAACGTGACTTTGTGGGTACGTTGATCTGCTCTGCTTAGTAGAAGGAGTGTGATCTGACTTTGTGGGTACGTTGATGACTTTGTGGGTACGTTGATCGACACCGAACGTGCGACAA
1433_chr15:23500000-23550000_Seq_2179_48841-48870	GCGTCGTTATGGTGCAACGTGACTTTGTGGGTACGTTGATTGGGATCAGTGTTTGCCTTTACCTCCAGGAGACTTTGTGGGTACGTTGATGACTTTGTGGGTACGTTGATCGACACCGAACGTGCGACAA
1436_chr15:23500000-23550000_Seq_2182_48901-48930	GCGTCGTTATGGTGCAACGTGACTTTGTGGGTACGTTGATGATGTAACCTGTTGTGTTGTTATTTGCCTTGACTTTGTGGGTACGTTGATGACTTTGTGGGTACGTTGATCGACACCGAACGTGCGACAA
1439_chr15:23500000-23550000_Seq_2185_48961-48990	GCGTCGTTATGGTGCAACGTGACTTTGTGGGTACGTTGATTGGGATATGGCGGATCCCATCCCTGGAGACGACTTTGTGGGTACGTTGATGACTTTGTGGGTACGTTGATCGACACCGAACGTGCGACAA
1442_chr15:23500000-23550000_Seq_2188_49021-49050	GCGTCGTTATGGTGCAACGTGACTTTGTGGGTACGTTGATAAGGAAAGCAACATTTGGTTCTAGTTTCTCGACTTTGTGGGTACGTTGATGACTTTGTGGGTACGTTGATCGACACCGAACGTGCGACAA
1445_chr15:23500000-23550000_Seq_2191_49081-49110	GCGTCGTTATGGTGCAACGTGACTTTGTGGGTACGTTGATGAAAGATTGCAAAACACTCAATCAATGCTCGACTTTGTGGGTACGTTGATGACTTTGTGGGTACGTTGATCGACACCGAACGTGCGACAA
1448_chr15:23500000-23550000_Seq_2194_49141-49170	GCGTCGTTATGGTGCAACGTGACTTTGTGGGTACGTTGATTCATACAAAGGGTCTCATACTCAAAGAGATGACTTTGTGGGTACGTTGATGACTTTGTGGGTACGTTGATCGACACCGAACGTGCGACAA
1451_chr15:23500000-23550000_Seq_2197_49201-49230	GCGTCGTTATGGTGCAACGTGACTTTGTGGGTACGTTGATCTGGATATTGAGACCAGCCATGCCTCTGAGGACTTTGTGGGTACGTTGATGACTTTGTGGGTACGTTGATCGACACCGAACGTGCGACAA
1454_chr15:23500000-23550000_Seq_2200_49261-49290	GCGTCGTTATGGTGCAACGTGACTTTGTGGGTACGTTGATGCTACTCATAGCAGACATTATTCAGACTGCGACTTTGTGGGTACGTTGATGACTTTGTGGGTACGTTGATCGACACCGAACGTGCGACAA
1457_chr15:23500000-23550000_Seq_2203_49370-49399	GCGTCGTTATGGTGCAACGTGACTTTGTGGGTACGTTGATTGAAATATTATCTACCTAGAAATACAAGCCGACTTTGTGGGTACGTTGATGACTTTGTGGGTACGTTGATCGACACCGAACGTGCGACAA
1460_chr15:23500000-23550000_Seq_2206_49457-49486	GCGTCGTTATGGTGCAACGTGACTTTGTGGGTACGTTGATACTGATTCAACTGTGTAAAGGTTTGGACCCGACTTTGTGGGTACGTTGATGACTTTGTGGGTACGTTGATCGACACCGAACGTGCGACAA
1463_chr15:23500000-23550000_Seq_2209_49517-49546	GCGTCGTTATGGTGCAACGTGACTTTGTGGGTACGTTGATCaagatctttccactcctttctttttcctcGACTTTGTGGGTACGTTGATGACTTTGTGGGTACGTTGATCGACACCGAACGTGCGACAA
1466_chr15:23500000-23550000_Seq_2213_49663-49692	GCGTCGTTATGGTGCAACGTGACTTTGTGGGTACGTTGATCATTTTATtgattgactggttgatttactgGACTTTGTGGGTACGTTGATGACTTTGTGGGTACGTTGATCGACACCGAACGTGCGACAA
1469_chr15:23500000-23550000_Seq_2220_49803-49832	GCGTCGTTATGGTGCAACGTGACTTTGTGGGTACGTTGATcccacctcagtctctttaatagctgggaacGACTTTGTGGGTACGTTGATGACTTTGTGGGTACGTTGATCGACACCGAACGTGCGACAA
1472_chr15:23500000-23550000_Seq_2225_49903-49932	GCGTCGTTATGGTGCAACGTGACTTTGTGGGTACGTTGATgaactttccaccttggccttccaaattataGACTTTGTGGGTACGTTGATGACTTTGTGGGTACGTTGATCGACACCGAACGTGCGACAA
1474_chr15:23500000-23550000_Seq_2227_49960-49989	GCGTCGTTATGGTGCAACGTGACTTTGTGGGTACGTTGATcCCCCTCCCAGTTTTTACTGACTAGATAAGGACTTTGTGGGTACGTTGATGACTTTGTGGGTACGTTGATCGACACCGAACGTGCGACAA
1477_chr15:23550001-23600000_Seq_3_41-70	GCGTCGTTATGGTGCAACGTTCGTATTCGCCTTACTGTGTACTCACACCTGCTAGGATTATAGGAGTAAGTCGTATTCGCCTTACTGTGTTCGTATTCGCCTTACTGTGTCGACACCGAACGTGCGACAA
1480_chr15:23550001-23600000_Seq_6_180-209	GCGTCGTTATGGTGCAACGTTCGTATTCGCCTTACTGTGTtgaaagaagctttttacccctcttctaggaTCGTATTCGCCTTACTGTGTTCGTATTCGCCTTACTGTGTCGACACCGAACGTGCGACAA
1483_chr15:23550001-23600000_Seq_10_299-328	GCGTCGTTATGGTGCAACGTTCGTATTCGCCTTACTGTGTtttttagtataggtatctagcatttccagcTCGTATTCGCCTTACTGTGTTCGTATTCGCCTTACTGTGTCGACACCGAACGTGCGACAA
1485_chr15:23550001-23600000_Seq_12_339-368	GCGTCGTTATGGTGCAACGTTCGTATTCGCCTTACTGTGTaaagagactatcatttccccattttgtattTCGTATTCGCCTTACTGTGTTCGTATTCGCCTTACTGTGTCGACACCGAACGTGCGACAA
1488_chr15:23550001-23600000_Seq_15_399-428	GCGTCGTTATGGTGCAACGTTCGTATTCGCCTTACTGTGTatatatggaggagttgatttaagatttccaTCGTATTCGCCTTACTGTGTTCGTATTCGCCTTACTGTGTCGACACCGAACGTGCGACAA
1491_chr15:23550001-23600000_Seq_21_525-554	GCGTCGTTATGGTGCAACGTTCGTATTCGCCTTACTGTGTgcctctagctttgttattattttgcaagatTCGTATTCGCCTTACTGTGTTCGTATTCGCCTTACTGTGTCGACACCGAACGTGCGACAA
1494_chr15:23550001-23600000_Seq_25_644-673	GCGTCGTTATGGTGCAACGTTCGTATTCGCCTTACTGTGTgaggatagtattaaatctgtagatcatttgTCGTATTCGCCTTACTGTGTTCGTATTCGCCTTACTGTGTCGACACCGAACGTGCGACAA
1496_chr15:23550001-23600000_Seq_29_740-769	GCGTCGTTATGGTGCAACGTTCGTATTCGCCTTACTGTGTtttgtatctgctttaatttccttcatcaagTCGTATTCGCCTTACTGTGTTCGTATTCGCCTTACTGTGTCGACACCGAACGTGCGACAA
1499_chr15:23550001-23600000_Seq_34_1094-1123	GCGTCGTTATGGTGCAACGTTCGTATTCGCCTTACTGTGTaaacagataattgtcttctttctgatttggTCGTATTCGCCTTACTGTGTTCGTATTCGCCTTACTGTGTCGACACCGAACGTGCGACAA
1502_chr15:23550001-23600000_Seq_38_1176-1205	GCGTCGTTATGGTGCAACGTTCGTATTCGCCTTACTGTGTatagaagtgacaagagtaggcatccttgccTCGTATTCGCCTTACTGTGTTCGTATTCGCCTTACTGTGTCGACACCGAACGTGCGACAA
1505_chr15:23550001-23600000_Seq_43_1289-1318	GCGTCGTTATGGTGCAACGTTCGTATTCGCCTTACTGTGTtgagttatatttattccataaccagtttgcTCGTATTCGCCTTACTGTGTTCGTATTCGCCTTACTGTGTCGACACCGAACGTGCGACAA
1507_chr15:23550001-23600000_Seq_45_1329-1358	GCGTCGTTATGGTGCAACGTTCGTATTCGCCTTACTGTGTtcacagagtagtcaatattgtcaaatccttTCGTATTCGCCTTACTGTGTTCGTATTCGCCTTACTGTGTCGACACCGAACGTGCGACAA
1510_chr15:23550001-23600000_Seq_49_1410-1439	GCGTCGTTATGGTGCAACGTTCGTATTCGCCTTACTGTGTggtatctcacatttactgatttctatgtgtTCGTATTCGCCTTACTGTGTTCGTATTCGCCTTACTGTGTCGACACCGAACGTGCGACAA
1513_chr15:23550001-23600000_Seq_52_1470-1499	GCGTCGTTATGGTGCAACGTTCGTATTCGCCTTACTGTGTctacctggtcatagcatataattttcatgtTCGTATTCGCCTTACTGTGTTCGTATTCGCCTTACTGTGTCGACACCGAACGTGCGACAA
1516_chr15:23550001-23600000_Seq_57_1598-1627	GCGTCGTTATGGTGCAACGTTCGTATTCGCCTTACTGTGTtatggctttggcatcaagcaatgctggcctTCGTATTCGCCTTACTGTGTTCGTATTCGCCTTACTGTGTCGACACCGAACGTGCGACAA
1518_chr15:23550001-23600000_Seq_61_1685-1714	GCGTCGTTATGGTGCAACGTTCGTATTCGCCTTACTGTGTggactgacattggttccttcttagatgtttTCGTATTCGCCTTACTGTGTTCGTATTCGCCTTACTGTGTCGACACCGAACGTGCGACAA
1521_chr15:23550001-23600000_Seq_64_1745-1774	GCGTCGTTATGGTGCAACGTTCGTATTCGCCTTACTGTGTttggcattttgttgttgttgttcttgggaaTCGTATTCGCCTTACTGTGTTCGTATTCGCCTTACTGTGTCGACACCGAACGTGCGACAA
1524_chr15:23550001-23600000_Seq_67_1835-1864	GCGTCGTTATGGTGCAACGTTCGTATTCGCCTTACTGTGTttttcctgttttagttttaaggttttacggTCGTATTCGCCTTACTGTGTTCGTATTCGCCTTACTGTGTCGACACCGAACGTGCGACAA
1526_chr15:23550001-23600000_Seq_69_1910-1939	GCGTCGTTATGGTGCAACGTTCGTATTCGCCTTACTGTGTtaatgacagtaatcactatgattccttttcTCGTATTCGCCTTACTGTGTTCGTATTCGCCTTACTGTGTCGACACCGAACGTGCGACAA
1529_chr15:23550001-23600000_Seq_73_2112-2141	GCGTCGTTATGGTGCAACGTTCGTATTCGCCTTACTGTGTtatttccttccttcaactaactttggccttTCGTATTCGCCTTACTGTGTTCGTATTCGCCTTACTGTGTCGACACCGAACGTGCGACAA
1532_chr15:23550001-23600000_Seq_76_2172-2201	GCGTCGTTATGGTGCAACGTTCGTATTCGCCTTACTGTGTagttaggttgtttgtgatattacttcaactTCGTATTCGCCTTACTGTGTTCGTATTCGCCTTACTGTGTCGACACCGAACGTGCGACAA
1535_chr15:23550001-23600000_Seq_80_2252-2281	GCGTCGTTATGGTGCAACGTTCGTATTCGCCTTACTGTGTaacatcattaaagcctgctatttccttattTCGTATTCGCCTTACTGTGTTCGTATTCGCCTTACTGTGTCGACACCGAACGTGCGACAA
1537_chr15:23550001-23600000_Seq_83_2312-2341	GCGTCGTTATGGTGCAACGTTCGTATTCGCCTTACTGTGTtgaatatgtgacattaaagtctccttctacTCGTATTCGCCTTACTGTGTTCGTATTCGCCTTACTGTGTCGACACCGAACGTGCGACAA
1540_chr15:23550001-23600000_Seq_86_2372-2401	GCGTCGTTATGGTGCAACGTTCGTATTCGCCTTACTGTGTttctgtcatgtttgctttatatatgtaggtTCGTATTCGCCTTACTGTGTTCGTATTCGCCTTACTGTGTCGACACCGAACGTGCGACAA
1543_chr15:23550001-23600000_Seq_89_2501-2530	GCGTCGTTATGGTGCAACGTTCGTATTCGCCTTACTGTGTgtatttaaggtctatttggcctgttataaaTCGTATTCGCCTTACTGTGTTCGTATTCGCCTTACTGTGTCGACACCGAACGTGCGACAA
1546_chr15:23550001-23600000_Seq_93_2581-2610	GCGTCGTTATGGTGCAACGTTCGTATTCGCCTTACTGTGTtccttttacttccagcctatgtgtctccttTCGTATTCGCCTTACTGTGTTCGTATTCGCCTTACTGTGTCGACACCGAACGTGCGACAA
1548_chr15:23550001-23600000_Seq_95_2621-2650	GCGTCGTTATGGTGCAACGTTCGTATTCGCCTTACTGTGTtaagtctctctcgtagacagcatgtagatgTCGTATTCGCCTTACTGTGTTCGTATTCGCCTTACTGTGTCGACACCGAACGTGCGACAA
1551_chr15:23550001-23600000_Seq_98_2756-2785	GCGTCGTTATGGTGCAACGTTCGTATTCGCCTTACTGTGTttttctgtcagtcttgtagttattttgttcTCGTATTCGCCTTACTGTGTTCGTATTCGCCTTACTGTGTCGACACCGAACGTGCGACAA
1554_chr15:23550001-23600000_Seq_101_2830-2859	GCGTCGTTATGGTGCAACGTTCGTATTCGCCTTACTGTGTtttgcaatgatatgttgtgattcctttttcTCGTATTCGCCTTACTGTGTTCGTATTCGCCTTACTGTGTCGACACCGAACGTGCGACAA
1557_chr15:23550001-23600000_Seq_105_2914-2943	GCGTCGTTATGGTGCAACGTTCGTATTCGCCTTACTGTGTtaaaacatcttttaatcagcagttttgagcTCGTATTCGCCTTACTGTGTTCGTATTCGCCTTACTGTGTCGACACCGAACGTGCGACAA
1559_chr15:23550001-23600000_Seq_107_2959-2988	GCGTCGTTATGGTGCAACGTTCGTATTCGCCTTACTGTGTttgatcacaaacaaaaactctataacttggTCGTATTCGCCTTACTGTGTTCGTATTCGCCTTACTGTGTCGACACCGAACGTGCGACAA
1562_chr15:23550001-23600000_Seq_121_3285-3314	GCGTCGTTATGGTGCAACGTTCGTATTCGCCTTACTGTGTaaaaaccctctataaccttacttcttccccTCGTATTCGCCTTACTGTGTTCGTATTCGCCTTACTGTGTCGACACCGAACGTGCGACAA
1565_chr15:23550001-23600000_Seq_124_3454-3483	GCGTCGTTATGGTGCAACGTTCGTATTCGCCTTACTGTGTagagtatatgtatctgtgcatttgtatgtaTCGTATTCGCCTTACTGTGTTCGTATTCGCCTTACTGTGTCGACACCGAACGTGCGACAA
1567_chr15:23550001-23600000_Seq_127_3520-3549	GCGTCGTTATGGTGCAACGTTCGTATTCGCCTTACTGTGTttgtgttgctgtttagcatccttttgtttcTCGTATTCGCCTTACTGTGTTCGTATTCGCCTTACTGTGTCGACACCGAACGTGCGACAA
1570_chr15:23550001-23600000_Seq_132_3620-3649	GCGTCGTTATGGTGCAACGTTCGTATTCGCCTTACTGTGTctgggaaagtcttcatctctcttttggtttTCGTATTCGCCTTACTGTGTTCGTATTCGCCTTACTGTGTCGACACCGAACGTGCGACAA
1573_chr15:23550001-23600000_Seq_135_3701-3730	GCGTCGTTATGGTGCAACGTTCGTATTCGCCTTACTGTGTGGGAATCTCAGGGTTATGCCTTTCACCCAGTCGTATTCGCCTTACTGTGTTCGTATTCGCCTTACTGTGTCGACACCGAACGTGCGACAA
1576_chr15:23550001-23600000_Seq_138_3761-3790	GCGTCGTTATGGTGCAACGTTCGTATTCGCCTTACTGTGTAATGCACTGAGAGGTCTGCATGCTGGATGCTCGTATTCGCCTTACTGTGTTCGTATTCGCCTTACTGTGTCGACACCGAACGTGCGACAA
1578_chr15:23550001-23600000_Seq_140_3819-3848	GCGTCGTTATGGTGCAACGTTCGTATTCGCCTTACTGTGTAGGCCCTTGAATCGCCCCAtgctagtgactTCGTATTCGCCTTACTGTGTTCGTATTCGCCTTACTGTGTCGACACCGAACGTGCGACAA
1581_chr15:23550001-23600000_Seq_144_3899-3928	GCGTCGTTATGGTGCAACGTTCGTATTCGCCTTACTGTGTatgtgatggtatttagaggtggcacctttgTCGTATTCGCCTTACTGTGTTCGTATTCGCCTTACTGTGTCGACACCGAACGTGCGACAA
1584_chr15:23550001-23600000_Seq_147_3959-3988	GCGTCGTTATGGTGCAACGTTCGTATTCGCCTTACTGTGTtcataaattgtattagtgcccttacaagaaTCGTATTCGCCTTACTGTGTTCGTATTCGCCTTACTGTGTCGACACCGAACGTGCGACAA
1587_chr15:23550001-23600000_Seq_150_4028-4057	GCGTCGTTATGGTGCAACGTTCGTATTCGCCTTACTGTGTtacagagagaagatggccatttgcaaaccaTCGTATTCGCCTTACTGTGTTCGTATTCGCCTTACTGTGTCGACACCGAACGTGCGACAA
1589_chr15:23550001-23600000_Seq_152_4068-4097	GCGTCGTTATGGTGCAACGTTCGTATTCGCCTTACTGTGTcctcaccacagactagatttgccacttcctTCGTATTCGCCTTACTGTGTTCGTATTCGCCTTACTGTGTCGACACCGAACGTGCGACAA
1592_chr15:23550001-23600000_Seq_156_4159-4188	GCGTCGTTATGGTGCAACGTTCGTATTCGCCTTACTGTGTtatttgttgtttatttgtttaagccaccagTCGTATTCGCCTTACTGTGTTCGTATTCGCCTTACTGTGTCGACACCGAACGTGCGACAA
1595_chr15:23550001-23600000_Seq_160_4239-4268	GCGTCGTTATGGTGCAACGTTCGTATTCGCCTTACTGTGTTTGGATAGGGTTGGCCTGCAGTTTTACAACTCGTATTCGCCTTACTGTGTTCGTATTCGCCTTACTGTGTCGACACCGAACGTGCGACAA
1598_chr15:23550001-23600000_Seq_165_4364-4393	GCGTCGTTATGGTGCAACGTTCGTATTCGCCTTACTGTGTAATTTTCACTTTGAAAATTATACTCCGCTGTCGTATTCGCCTTACTGTGTTCGTATTCGCCTTACTGTGTCGACACCGAACGTGCGACAA
1600_chr15:23550001-23600000_Seq_167_4412-4441	GCGTCGTTATGGTGCAACGTTCGTATTCGCCTTACTGTGTTACAGAAATACTGAAAACATTATTTGTGCCTCGTATTCGCCTTACTGTGTTCGTATTCGCCTTACTGTGTCGACACCGAACGTGCGACAA
1603_chr15:23550001-23600000_Seq_183_4732-4761	GCGTCGTTATGGTGCAACGTTCGTATTCGCCTTACTGTGTtcagttacctcccaccaggtgtctgctacaTCGTATTCGCCTTACTGTGTTCGTATTCGCCTTACTGTGTCGACACCGAACGTGCGACAA
1606_chr15:23550001-23600000_Seq_188_4832-4861	GCGTCGTTATGGTGCAACGTTCGTATTCGCCTTACTGTGTTGCTTTGGTTCATGGATACCAGTACTGTTTTCGTATTCGCCTTACTGTGTTCGTATTCGCCTTACTGTGTCGACACCGAACGTGCGACAA
1608_chr15:23550001-23600000_Seq_190_4895-4924	GCGTCGTTATGGTGCAACGTTCGTATTCGCCTTACTGTGTACCTGGTGTCAAAATGATAAATCTTTTTCTTCGTATTCGCCTTACTGTGTTCGTATTCGCCTTACTGTGTCGACACCGAACGTGCGACAA
1611_chr15:23550001-23600000_Seq_193_4955-4984	GCGTCGTTATGGTGCAACGTTCGTATTCGCCTTACTGTGTCTGAATAATATAAAGCAGTTTCAAAGGACATCGTATTCGCCTTACTGTGTTCGTATTCGCCTTACTGTGTCGACACCGAACGTGCGACAA
1614_chr15:23550001-23600000_Seq_199_5075-5104	GCGTCGTTATGGTGCAACGTTCGTATTCGCCTTACTGTGTcttcaaactatattttaagactacggttacTCGTATTCGCCTTACTGTGTTCGTATTCGCCTTACTGTGTCGACACCGAACGTGCGACAA
1617_chr15:23550001-23600000_Seq_205_5198-5227	GCGTCGTTATGGTGCAACGTTCGTATTCGCCTTACTGTGTgatctttgaacagaattgacaaaaataagcTCGTATTCGCCTTACTGTGTTCGTATTCGCCTTACTGTGTCGACACCGAACGTGCGACAA
1619_chr15:23550001-23600000_Seq_222_5581-5610	GCGTCGTTATGGTGCAACGTTCGTATTCGCCTTACTGTGTaaatggtgttgggataacttggtagccacaTCGTATTCGCCTTACTGTGTTCGTATTCGCCTTACTGTGTCGACACCGAACGTGCGACAA
1622_chr15:23550001-23600000_Seq_231_5766-5795	GCGTCGTTATGGTGCAACGTTCGTATTCGCCTTACTGTGTtgactaagtcctcaaaatcaactgtaacaaTCGTATTCGCCTTACTGTGTTCGTATTCGCCTTACTGTGTCGACACCGAACGTGCGACAA
1625_chr15:23550001-23600000_Seq_239_5942-5971	GCGTCGTTATGGTGCAACGTTCGTATTCGCCTTACTGTGTataaggaacttagtaagaaataaacaacccTCGTATTCGCCTTACTGTGTTCGTATTCGCCTTACTGTGTCGACACCGAACGTGCGACAA
1628_chr15:23550001-23600000_Seq_248_6161-6190	GCGTCGTTATGGTGCAACGTTCGTATTCGCCTTACTGTGTCAccgccgccatatgagacacgcctttcacTCGTATTCGCCTTACTGTGTTCGTATTCGCCTTACTGTGTCGACACCGAACGTGCGACAA
1630_chr15:23550001-23600000_Seq_256_6321-6350	GCGTCGTTATGGTGCAACGTTCGTATTCGCCTTACTGTGTttcagagaaatacaagtcaataccatgagaTCGTATTCGCCTTACTGTGTTCGTATTCGCCTTACTGTGTCGACACCGAACGTGCGACAA
1633_chr15:23550001-23600000_Seq_261_6426-6455	GCGTCGTTATGGTGCAACGTTCGTATTCGCCTTACTGTGTggctacagagcaaagagaattatacactctTCGTATTCGCCTTACTGTGTTCGTATTCGCCTTACTGTGTCGACACCGAACGTGCGACAA
1636_chr15:23550001-23600000_Seq_270_6634-6663	GCGTCGTTATGGTGCAACGTTCGTATTCGCCTTACTGTGTatagagaataatcccagatgccttacaatgTCGTATTCGCCTTACTGTGTTCGTATTCGCCTTACTGTGTCGACACCGAACGTGCGACAA
1639_chr15:23550001-23600000_Seq_276_6754-6783	GCGTCGTTATGGTGCAACGTTCGTATTCGCCTTACTGTGTtggatgtagctagaggccattattttaaacTCGTATTCGCCTTACTGTGTTCGTATTCGCCTTACTGTGTCGACACCGAACGTGCGACAA
1641_chr15:23550001-23600000_Seq_279_6820-6849	GCGTCGTTATGGTGCAACGTTCGTATTCGCCTTACTGTGTttctcacttacaactgggaattaaatattgTCGTATTCGCCTTACTGTGTTCGTATTCGCCTTACTGTGTCGACACCGAACGTGCGACAA
1644_chr15:23550001-23600000_Seq_285_6943-6972	GCGTCGTTATGGTGCAACGTTCGTATTCGCCTTACTGTGTtctatgcttactagctgggtgacatgatcaTCGTATTCGCCTTACTGTGTTCGTATTCGCCTTACTGTGTCGACACCGAACGTGCGACAA
1647_chr15:23550001-23600000_Seq_292_7116-7145	GCGTCGTTATGGTGCAACGTTCGTATTCGCCTTACTGTGTcggagtgcaagggtacgatctcggcccactTCGTATTCGCCTTACTGTGTTCGTATTCGCCTTACTGTGTCGACACCGAACGTGCGACAA
1649_chr15:23550001-23600000_Seq_315_7620-7649	GCGTCGTTATGGTGCAACGTTCGTATTCGCCTTACTGTGTacctcgggatctgcctgcctcgacctcccaTCGTATTCGCCTTACTGTGTTCGTATTCGCCTTACTGTGTCGACACCGAACGTGCGACAA
1652_chr15:23550001-23600000_Seq_320_7740-7769	GCGTCGTTATGGTGCAACGTTCGTATTCGCCTTACTGTGTggagcccttatgtattgctaatttaactatTCGTATTCGCCTTACTGTGTTCGTATTCGCCTTACTGTGTCGACACCGAACGTGCGACAA
1655_chr15:23550001-23600000_Seq_323_7804-7833	GCGTCGTTATGGTGCAACGTTCGTATTCGCCTTACTGTGTtctcagaatgttatacatataattccttgcTCGTATTCGCCTTACTGTGTTCGTATTCGCCTTACTGTGTCGACACCGAACGTGCGACAA
1658_chr15:23550001-23600000_Seq_326_7864-7893	GCGTCGTTATGGTGCAACGTTCGTATTCGCCTTACTGTGTaggaaaacacatggccacataaaagcttgtTCGTATTCGCCTTACTGTGTTCGTATTCGCCTTACTGTGTCGACACCGAACGTGCGACAA
1660_chr15:23550001-23600000_Seq_329_7945-7974	GCGTCGTTATGGTGCAACGTTCGTATTCGCCTTACTGTGTaaaaacaaatatctatcaactcctgaaaggTCGTATTCGCCTTACTGTGTTCGTATTCGCCTTACTGTGTCGACACCGAACGTGCGACAA
1663_chr15:23550001-23600000_Seq_332_8043-8072	GCGTCGTTATGGTGCAACGTTCGTATTCGCCTTACTGTGTagaatgaacctcgaaatgtaaagtgaaagaTCGTATTCGCCTTACTGTGTTCGTATTCGCCTTACTGTGTCGACACCGAACGTGCGACAA
1666_chr15:23550001-23600000_Seq_335_8106-8135	GCGTCGTTATGGTGCAACGTTCGTATTCGCCTTACTGTGTctctttataagaaatatccataattggcagTCGTATTCGCCTTACTGTGTTCGTATTCGCCTTACTGTGTCGACACCGAACGTGCGACAA
1669_chr15:23550001-23600000_Seq_338_8166-8195	GCGTCGTTATGGTGCAACGTTCGTATTCGCCTTACTGTGTagctaaggctgagggtgagaatattccaaaTCGTATTCGCCTTACTGTGTTCGTATTCGCCTTACTGTGTCGACACCGAACGTGCGACAA
1671_chr15:23550001-23600000_Seq_340_8251-8280	GCGTCGTTATGGTGCAACGTTCGTATTCGCCTTACTGTGTatgcatctaaaacattttatgatggtatgcTCGTATTCGCCTTACTGTGTTCGTATTCGCCTTACTGTGTCGACACCGAACGTGCGACAA
1674_chr15:23550001-23600000_Seq_343_8436-8465	GCGTCGTTATGGTGCAACGTTCGTATTCGCCTTACTGTGTAGGTCTGTTGTGTCCTATCCCTGTGTCATATCGTATTCGCCTTACTGTGTTCGTATTCGCCTTACTGTGTCGACACCGAACGTGCGACAA
1677_chr15:23550001-23600000_Seq_346_8497-8526	GCGTCGTTATGGTGCAACGTTCGTATTCGCCTTACTGTGTCAGTTTCATTTTACTGATATCAAAAAGGACTCGTATTCGCCTTACTGTGTTCGTATTCGCCTTACTGTGTCGACACCGAACGTGCGACAA
1680_chr15:23550001-23600000_Seq_349_8608-8637	GCGTCGTTATGGTGCAACGTTCGTATTCGCCTTACTGTGTTTGAAGTTCCCAAAACTTCACTGATTATTATCGTATTCGCCTTACTGTGTTCGTATTCGCCTTACTGTGTCGACACCGAACGTGCGACAA
1682_chr15:23550001-23600000_Seq_351_8680-8709	GCGTCGTTATGGTGCAACGTTCGTATTCGCCTTACTGTGTtattgtcctaagagttttctcataaatagcTCGTATTCGCCTTACTGTGTTCGTATTCGCCTTACTGTGTCGACACCGAACGTGCGACAA
1685_chr15:23550001-23600000_Seq_359_8909-8938	GCGTCGTTATGGTGCAACGTTCGTATTCGCCTTACTGTGTaattacaggcacttggcagctgatttttgtTCGTATTCGCCTTACTGTGTTCGTATTCGCCTTACTGTGTCGACACCGAACGTGCGACAA
1688_chr15:23550001-23600000_Seq_367_9116-9145	GCGTCGTTATGGTGCAACGTTCGTATTCGCCTTACTGTGTcctttaataactagaatgaatccttctttgTCGTATTCGCCTTACTGTGTTCGTATTCGCCTTACTGTGTCGACACCGAACGTGCGACAA
1690_chr15:23550001-23600000_Seq_369_9177-9206	GCGTCGTTATGGTGCAACGTTCGTATTCGCCTTACTGTGTAGATTATGAGCAACATGGATCTGTAATGttTCGTATTCGCCTTACTGTGTTCGTATTCGCCTTACTGTGTCGACACCGAACGTGCGACAA
1693_chr15:23550001-23600000_Seq_372_9282-9311	GCGTCGTTATGGTGCAACGTTCGTATTCGCCTTACTGTGTtgtaattaatttcctttaatagctagagggTCGTATTCGCCTTACTGTGTTCGTATTCGCCTTACTGTGTCGACACCGAACGTGCGACAA
1696_chr15:23550001-23600000_Seq_375_9365-9394	GCGTCGTTATGGTGCAACGTTCGTATTCGCCTTACTGTGTctagaaagttaaccatttcaagtacatttcTCGTATTCGCCTTACTGTGTTCGTATTCGCCTTACTGTGTCGACACCGAACGTGCGACAA
1699_chr15:23550001-23600000_Seq_378_9425-9454	GCGTCGTTATGGTGCAACGTTCGTATTCGCCTTACTGTGTtctacgatctcattaaagtctgtatgcataTCGTATTCGCCTTACTGTGTTCGTATTCGCCTTACTGTGTCGACACCGAACGTGCGACAA
1701_chr15:23550001-23600000_Seq_380_9477-9506	GCGTCGTTATGGTGCAACGTTCGTATTCGCCTTACTGTGTttcttcatattggttagttgagtaatcatcTCGTATTCGCCTTACTGTGTTCGTATTCGCCTTACTGTGTCGACACCGAACGTGCGACAA
1704_chr15:23550001-23600000_Seq_384_9595-9624	GCGTCGTTATGGTGCAACGTTCGTATTCGCCTTACTGTGTagtacatgtggtattttaatacctgtatacTCGTATTCGCCTTACTGTGTTCGTATTCGCCTTACTGTGTCGACACCGAACGTGCGACAA
1707_chr15:23550001-23600000_Seq_387_9760-9789	GCGTCGTTATGGTGCAACGTTCGTATTCGCCTTACTGTGTctgaattgaataattatgtcagaggaaatcTCGTATTCGCCTTACTGTGTTCGTATTCGCCTTACTGTGTCGACACCGAACGTGCGACAA
1710_chr15:23550001-23600000_Seq_390_9879-9908	GCGTCGTTATGGTGCAACGTTCGTATTCGCCTTACTGTGTactagcacacaaaattttatatatagcaccTCGTATTCGCCTTACTGTGTTCGTATTCGCCTTACTGTGTCGACACCGAACGTGCGACAA
1712_chr15:23550001-23600000_Seq_392_9962-9991	GCGTCGTTATGGTGCAACGTTCGTATTCGCCTTACTGTGTgacatgtgggtcatttagaaatatagttatTCGTATTCGCCTTACTGTGTTCGTATTCGCCTTACTGTGTCGACACCGAACGTGCGACAA
1715_chr15:23550001-23600000_Seq_395_10069-10098	GCGTCGTTATGGTGCAACGTTCGTATTCGCCTTACTGTGTactctgaattatttcgatctttggaatatgTCGTATTCGCCTTACTGTGTTCGTATTCGCCTTACTGTGTCGACACCGAACGTGCGACAA
1718_chr15:23550001-23600000_Seq_398_10154-10183	GCGTCGTTATGGTGCAACGTTCGTATTCGCCTTACTGTGTaaaagaggtgtaaatactCCTACAACCACTTCGTATTCGCCTTACTGTGTTCGTATTCGCCTTACTGTGTCGACACCGAACGTGCGACAA
1721_chr15:23550001-23600000_Seq_401_10259-10288	GCGTCGTTATGGTGCAACGTTCGTATTCGCCTTACTGTGTAATCTTCTGGATACTTTTCTACAGATGTCATCGTATTCGCCTTACTGTGTTCGTATTCGCCTTACTGTGTCGACACCGAACGTGCGACAA
1723_chr15:23550001-23600000_Seq_403_10317-10346	GCGTCGTTATGGTGCAACGTTCGTATTCGCCTTACTGTGTTGGTTAACAGAATTTTGTCATATTGCTATGTCGTATTCGCCTTACTGTGTTCGTATTCGCCTTACTGTGTCGACACCGAACGTGCGACAA
1726_chr15:23550001-23600000_Seq_406_10417-10446	GCGTCGTTATGGTGCAACGTTCGTATTCGCCTTACTGTGTTACTGTGGTCTTTTCCCTTTGTTATTCAATTCGTATTCGCCTTACTGTGTTCGTATTCGCCTTACTGTGTCGACACCGAACGTGCGACAA
1729_chr15:23550001-23600000_Seq_409_10482-10511	GCGTCGTTATGGTGCAACGTTCGTATTCGCCTTACTGTGTTAATGGACTTTCTAATCTTTTATGTAGGACTCGTATTCGCCTTACTGTGTTCGTATTCGCCTTACTGTGTCGACACCGAACGTGCGACAA
1731_chr15:23550001-23600000_Seq_411_10522-10551	GCGTCGTTATGGTGCAACGTTCGTATTCGCCTTACTGTGTTTGTCTGGTCATGCAGGTATGATTGTACGATCGTATTCGCCTTACTGTGTTCGTATTCGCCTTACTGTGTCGACACCGAACGTGCGACAA
1734_chr15:23550001-23600000_Seq_414_10582-10611	GCGTCGTTATGGTGCAACGTTCGTATTCGCCTTACTGTGTTGCCTGAACATTTTGGAGGAGGAAAGGAACTCGTATTCGCCTTACTGTGTTCGTATTCGCCTTACTGTGTCGACACCGAACGTGCGACAA
1737_chr15:23550001-23600000_Seq_417_10672-10701	GCGTCGTTATGGTGCAACGTTCGTATTCGCCTTACTGTGTAGTTAATTCTGTCCTTTTTCCCAGTGGCCTTCGTATTCGCCTTACTGTGTTCGTATTCGCCTTACTGTGTCGACACCGAACGTGCGACAA
1740_chr15:23550001-23600000_Seq_420_10732-10761	GCGTCGTTATGGTGCAACGTTCGTATTCGCCTTACTGTGTCATGGTTTATGAGGATGCACCTCACTGGACTCGTATTCGCCTTACTGTGTTCGTATTCGCCTTACTGTGTCGACACCGAACGTGCGACAA
1742_chr15:23550001-23600000_Seq_422_10772-10801	GCGTCGTTATGGTGCAACGTTCGTATTCGCCTTACTGTGTAGAGGAAGGAGAAAATAGGACTCCATCATTTCGTATTCGCCTTACTGTGTTCGTATTCGCCTTACTGTGTCGACACCGAACGTGCGACAA
1745_chr15:23550001-23600000_Seq_425_10832-10861	GCGTCGTTATGGTGCAACGTTCGTATTCGCCTTACTGTGTTCATTTTGACATTTTTCCCCTTTTTGGAAATCGTATTCGCCTTACTGTGTTCGTATTCGCCTTACTGTGTCGACACCGAACGTGCGACAA
1748_chr15:23550001-23600000_Seq_428_10899-10928	GCGTCGTTATGGTGCAACGTTCGTATTCGCCTTACTGTGTttaagaatgcattaaattttgcctctaagcTCGTATTCGCCTTACTGTGTTCGTATTCGCCTTACTGTGTCGACACCGAACGTGCGACAA
1751_chr15:23550001-23600000_Seq_431_10959-10988	GCGTCGTTATGGTGCAACGTTCGTATTCGCCTTACTGTGTcatgttatacactcattactgttcagttgaTCGTATTCGCCTTACTGTGTTCGTATTCGCCTTACTGTGTCGACACCGAACGTGCGACAA
1753_chr15:23550001-23600000_Seq_433_11011-11040	GCGTCGTTATGGTGCAACGTTCGTATTCGCCTTACTGTGTtgattgcttctaccacccacaggttatttaTCGTATTCGCCTTACTGTGTTCGTATTCGCCTTACTGTGTCGACACCGAACGTGCGACAA
1756_chr15:23550001-23600000_Seq_436_11082-11111	GCGTCGTTATGGTGCAACGTTCGTATTCGCCTTACTGTGTCACATTAACTATTTCCTGTCTTTTAAGCATTCGTATTCGCCTTACTGTGTTCGTATTCGCCTTACTGTGTCGACACCGAACGTGCGACAA
1759_chr15:23550001-23600000_Seq_439_11144-11173	GCGTCGTTATGGTGCAACGTTCGTATTCGCCTTACTGTGTTGTTCCGGATAAAAATACTAGCTTGAGATATCGTATTCGCCTTACTGTGTTCGTATTCGCCTTACTGTGTCGACACCGAACGTGCGACAA
1762_chr15:23550001-23600000_Seq_442_11206-11235	GCGTCGTTATGGTGCAACGTTCGTATTCGCCTTACTGTGTAGCATGTTTTGTATGTATAAAATACAGCAGTCGTATTCGCCTTACTGTGTTCGTATTCGCCTTACTGTGTCGACACCGAACGTGCGACAA
1764_chr15:23550001-23600000_Seq_444_11246-11275	GCGTCGTTATGGTGCAACGTTCGTATTCGCCTTACTGTGTTTCTGTTAACCACCTTAAAGTTGAAATGTATCGTATTCGCCTTACTGTGTTCGTATTCGCCTTACTGTGTCGACACCGAACGTGCGACAA
1767_chr15:23550001-23600000_Seq_447_11352-11381	GCGTCGTTATGGTGCAACGTTCGTATTCGCCTTACTGTGTTAAGCAGTATCTTTTATGATCTTTAAGTGGTCGTATTCGCCTTACTGTGTTCGTATTCGCCTTACTGTGTCGACACCGAACGTGCGACAA
1770_chr15:23550001-23600000_Seq_450_11450-11479	GCGTCGTTATGGTGCAACGTTCGTATTCGCCTTACTGTGTTGTTATCCAGTTATTCACTCAGGGTGATCATCGTATTCGCCTTACTGTGTTCGTATTCGCCTTACTGTGTCGACACCGAACGTGCGACAA
1773_chr15:23550001-23600000_Seq_453_11510-11539	GCGTCGTTATGGTGCAACGTTCGTATTCGCCTTACTGTGTTAAAGGAGTGCTGTTCCAGCCAGAATCCTATCGTATTCGCCTTACTGTGTTCGTATTCGCCTTACTGTGTCGACACCGAACGTGCGACAA
1775_chr15:23550001-23600000_Seq_455_11550-11579	GCGTCGTTATGGTGCAACGTTCGTATTCGCCTTACTGTGTAAGTGATGAAAGCACAAGAAATCCTCCACATCGTATTCGCCTTACTGTGTTCGTATTCGCCTTACTGTGTCGACACCGAACGTGCGACAA
1778_chr15:23550001-23600000_Seq_458_11610-11639	GCGTCGTTATGGTGCAACGTTCGTATTCGCCTTACTGTGTAGGGTTGGAGAAAACTGGCTCTTTAAATTTTCGTATTCGCCTTACTGTGTTCGTATTCGCCTTACTGTGTCGACACCGAACGTGCGACAA
1781_chr15:23550001-23600000_Seq_461_11703-11732	GCGTCGTTATGGTGCAACGTTCGTATTCGCCTTACTGTGTTGCCAGTAATTTCTAGGGCCCCTATAGAAATCGTATTCGCCTTACTGTGTTCGTATTCGCCTTACTGTGTCGACACCGAACGTGCGACAA
1783_chr15:23550001-23600000_Seq_463_11743-11772	GCGTCGTTATGGTGCAACGTTCGTATTCGCCTTACTGTGTGTGCACATAGAGGGACTGACACAAAGACTTTCGTATTCGCCTTACTGTGTTCGTATTCGCCTTACTGTGTCGACACCGAACGTGCGACAA
1786_chr15:23550001-23600000_Seq_466_11803-11832	GCGTCGTTATGGTGCAACGTTCGTATTCGCCTTACTGTGTATAGAAGAGACACTTACAGGTATCTTAAAGTCGTATTCGCCTTACTGTGTTCGTATTCGCCTTACTGTGTCGACACCGAACGTGCGACAA
1789_chr15:23550001-23600000_Seq_469_11901-11930	GCGTCGTTATGGTGCAACGTTCGTATTCGCCTTACTGTGTtgtgaactagtcggtgtaattcttgctgttTCGTATTCGCCTTACTGTGTTCGTATTCGCCTTACTGTGTCGACACCGAACGTGCGACAA
1792_chr15:23550001-23600000_Seq_472_11961-11990	GCGTCGTTATGGTGCAACGTTCGTATTCGCCTTACTGTGTaggtaactaatttgtgacaggggaaagtctTCGTATTCGCCTTACTGTGTTCGTATTCGCCTTACTGTGTCGACACCGAACGTGCGACAA
1794_chr15:23550001-23600000_Seq_474_12001-12030	GCGTCGTTATGGTGCAACGTTCGTATTCGCCTTACTGTGTccagtggattcaggatttaaacccacaatgTCGTATTCGCCTTACTGTGTTCGTATTCGCCTTACTGTGTCGACACCGAACGTGCGACAA
1797_chr15:23550001-23600000_Seq_479_12113-12142	GCGTCGTTATGGTGCAACGTTCGTATTCGCCTTACTGTGTCCCAGCCCCGCTGGGTCCTGGACCCCGCCGTCGTATTCGCCTTACTGTGTTCGTATTCGCCTTACTGTGTCGACACCGAACGTGCGACAA
1800_chr15:23550001-23600000_Seq_482_12173-12202	GCGTCGTTATGGTGCAACGTTCGTATTCGCCTTACTGTGTAAGGATAGGAGAGTGCTGAGAAGGATAATGTCGTATTCGCCTTACTGTGTTCGTATTCGCCTTACTGTGTCGACACCGAACGTGCGACAA
1803_chr15:23550001-23600000_Seq_485_12234-12263	GCGTCGTTATGGTGCAACGTTCGTATTCGCCTTACTGTGTTACGGACATGTTAACCACACGGGGCTAGGCTCGTATTCGCCTTACTGTGTTCGTATTCGCCTTACTGTGTCGACACCGAACGTGCGACAA
1805_chr15:23550001-23600000_Seq_487_12290-12319	GCGTCGTTATGGTGCAACGTTCGTATTCGCCTTACTGTGTAAAAACTGCAGGACTTTGCAGCTTCTCTCCTCGTATTCGCCTTACTGTGTTCGTATTCGCCTTACTGTGTCGACACCGAACGTGCGACAA
1808_chr15:23550001-23600000_Seq_490_12350-12379	GCGTCGTTATGGTGCAACGTTCGTATTCGCCTTACTGTGTTCCTCTTAGGATATTCTTAGACTGCCCGGATCGTATTCGCCTTACTGTGTTCGTATTCGCCTTACTGTGTCGACACCGAACGTGCGACAA
1811_chr15:23550001-23600000_Seq_493_12410-12439	GCGTCGTTATGGTGCAACGTTCGTATTCGCCTTACTGTGTTGCACTCATTCCATTCGGACCCCCAAATGCTCGTATTCGCCTTACTGTGTTCGTATTCGCCTTACTGTGTCGACACCGAACGTGCGACAA
1814_chr15:23550001-23600000_Seq_496_12470-12499	GCGTCGTTATGGTGCAACGTTCGTATTCGCCTTACTGTGTCAGACTGGTGTGTGCACAAGGAAACCAGGTTCGTATTCGCCTTACTGTGTTCGTATTCGCCTTACTGTGTCGACACCGAACGTGCGACAA
1816_chr15:23550001-23600000_Seq_498_12510-12539	GCGTCGTTATGGTGCAACGTTCGTATTCGCCTTACTGTGTGAGGCTGTCAGTGTTTTGTTAGAAAAGAAGTCGTATTCGCCTTACTGTGTTCGTATTCGCCTTACTGTGTCGACACCGAACGTGCGACAA
1819_chr15:23550001-23600000_Seq_501_12570-12599	GCGTCGTTATGGTGCAACGTTCGTATTCGCCTTACTGTGTACTAAATGTCTACTTTCTGAGAACTGTAAATCGTATTCGCCTTACTGTGTTCGTATTCGCCTTACTGTGTCGACACCGAACGTGCGACAA
1822_chr15:23550001-23600000_Seq_504_12665-12694	GCGTCGTTATGGTGCAACGTTCGTATTCGCCTTACTGTGTTCAGAGGAAATGATCTCTGAAGACATTTGGTCGTATTCGCCTTACTGTGTTCGTATTCGCCTTACTGTGTCGACACCGAACGTGCGACAA
1824_chr15:23550001-23600000_Seq_506_12705-12734	GCGTCGTTATGGTGCAACGTTCGTATTCGCCTTACTGTGTAACTAGTTTATTTTTCTCAAGATGCACTGCTCGTATTCGCCTTACTGTGTTCGTATTCGCCTTACTGTGTCGACACCGAACGTGCGACAA
1827_chr15:23550001-23600000_Seq_509_12817-12846	GCGTCGTTATGGTGCAACGTTCGTATTCGCCTTACTGTGTATTGTCACGACAAAACTAAAAGATAAAGTCTCGTATTCGCCTTACTGTGTTCGTATTCGCCTTACTGTGTCGACACCGAACGTGCGACAA
1830_chr15:23550001-23600000_Seq_512_12877-12906	GCGTCGTTATGGTGCAACGTTCGTATTCGCCTTACTGTGTGGCAGCCACACAGGTGGGCATTTGGAAGCATCGTATTCGCCTTACTGTGTTCGTATTCGCCTTACTGTGTCGACACCGAACGTGCGACAA
1833_chr15:23550001-23600000_Seq_515_12937-12966	GCGTCGTTATGGTGCAACGTTCGTATTCGCCTTACTGTGTGGGCAGGTGAGGAAACATATGCTTCTCAGTTCGTATTCGCCTTACTGTGTTCGTATTCGCCTTACTGTGTCGACACCGAACGTGCGACAA
1835_chr15:23550001-23600000_Seq_517_12977-13006	GCGTCGTTATGGTGCAACGTTCGTATTCGCCTTACTGTGTTAGGAGATGAgatggtcaaatattgtatagTCGTATTCGCCTTACTGTGTTCGTATTCGCCTTACTGTGTCGACACCGAACGTGCGACAA
1838_chr15:23550001-23600000_Seq_520_13065-13094	GCGTCGTTATGGTGCAACGTTCGTATTCGCCTTACTGTGTaaaaatggacattcatttcctccgtcactcTCGTATTCGCCTTACTGTGTTCGTATTCGCCTTACTGTGTCGACACCGAACGTGCGACAA
1841_chr15:23550001-23600000_Seq_523_13125-13154	GCGTCGTTATGGTGCAACGTTCGTATTCGCCTTACTGTGTtggggctagctttcatactgtacagcatgcTCGTATTCGCCTTACTGTGTTCGTATTCGCCTTACTGTGTCGACACCGAACGTGCGACAA
1844_chr15:23550001-23600000_Seq_526_13186-13215	GCGTCGTTATGGTGCAACGTTCGTATTCGCCTTACTGTGTtggacagtgctgGTGCATCAAGAGAGGGTCTCGTATTCGCCTTACTGTGTTCGTATTCGCCTTACTGTGTCGACACCGAACGTGCGACAA
1846_chr15:23550001-23600000_Seq_528_13226-13255	GCGTCGTTATGGTGCAACGTTCGTATTCGCCTTACTGTGTTAGATACAGTGCTGGGAAAATATCACAATTTCGTATTCGCCTTACTGTGTTCGTATTCGCCTTACTGTGTCGACACCGAACGTGCGACAA
1849_chr15:23550001-23600000_Seq_531_13316-13345	GCGTCGTTATGGTGCAACGTTCGTATTCGCCTTACTGTGTTTCAGGATTCTTATGTTTGTGAATTTGTAGTCGTATTCGCCTTACTGTGTTCGTATTCGCCTTACTGTGTCGACACCGAACGTGCGACAA
1852_chr15:23550001-23600000_Seq_534_13376-13405	GCGTCGTTATGGTGCAACGTTCGTATTCGCCTTACTGTGTCTGCAAGTCTTTTTCTTGTAAAAATCACTGTCGTATTCGCCTTACTGTGTTCGTATTCGCCTTACTGTGTCGACACCGAACGTGCGACAA
1855_chr15:23550001-23600000_Seq_537_13436-13465	GCGTCGTTATGGTGCAACGTTCGTATTCGCCTTACTGTGTAGTTTGTTTCAGAAAGTTCAAGTGAGGCAGTCGTATTCGCCTTACTGTGTTCGTATTCGCCTTACTGTGTCGACACCGAACGTGCGACAA
1857_chr15:23550001-23600000_Seq_539_13476-13505	GCGTCGTTATGGTGCAACGTTCGTATTCGCCTTACTGTGTAGCTTGCATGCAAAATATAAAACTTGGTAATCGTATTCGCCTTACTGTGTTCGTATTCGCCTTACTGTGTCGACACCGAACGTGCGACAA
1860_chr15:23550001-23600000_Seq_542_13536-13565	GCGTCGTTATGGTGCAACGTTCGTATTCGCCTTACTGTGTTTCCTACATTCACGATGAATAATCAGCACCTCGTATTCGCCTTACTGTGTTCGTATTCGCCTTACTGTGTCGACACCGAACGTGCGACAA
1863_chr15:23550001-23600000_Seq_545_13629-13658	GCGTCGTTATGGTGCAACGTTCGTATTCGCCTTACTGTGTccgactataaagactatatataaagtatccTCGTATTCGCCTTACTGTGTTCGTATTCGCCTTACTGTGTCGACACCGAACGTGCGACAA
1865_chr15:23550001-23600000_Seq_547_13710-13739	GCGTCGTTATGGTGCAACGTTCGTATTCGCCTTACTGTGTaaccttaattagtttaattcctaggttagcTCGTATTCGCCTTACTGTGTTCGTATTCGCCTTACTGTGTCGACACCGAACGTGCGACAA
1868_chr15:23550001-23600000_Seq_550_13833-13862	GCGTCGTTATGGTGCAACGTTCGTATTCGCCTTACTGTGTgactcctgtccagtgtccttgctaaatgtaTCGTATTCGCCTTACTGTGTTCGTATTCGCCTTACTGTGTCGACACCGAACGTGCGACAA
1871_chr15:23550001-23600000_Seq_553_13943-13972	GCGTCGTTATGGTGCAACGTTCGTATTCGCCTTACTGTGTcatcttttatttctttgctattacactagcTCGTATTCGCCTTACTGTGTTCGTATTCGCCTTACTGTGTCGACACCGAACGTGCGACAA
1874_chr15:23550001-23600000_Seq_556_14023-14052	GCGTCGTTATGGTGCAACGTTCGTATTCGCCTTACTGTGTAGAGAGAAAGTTTTAGAGACCTTTATTTAGTCGTATTCGCCTTACTGTGTTCGTATTCGCCTTACTGTGTCGACACCGAACGTGCGACAA
1876_chr15:23550001-23600000_Seq_558_14088-14117	GCGTCGTTATGGTGCAACGTTCGTATTCGCCTTACTGTGTccatattcacatgtatttctgctcctgtcaTCGTATTCGCCTTACTGTGTTCGTATTCGCCTTACTGTGTCGACACCGAACGTGCGACAA
1879_chr15:23550001-23600000_Seq_561_14155-14184	GCGTCGTTATGGTGCAACGTTCGTATTCGCCTTACTGTGTcatgtaacttttcaagttttatctcctaacTCGTATTCGCCTTACTGTGTTCGTATTCGCCTTACTGTGTCGACACCGAACGTGCGACAA
1882_chr15:23550001-23600000_Seq_564_14255-14284	GCGTCGTTATGGTGCAACGTTCGTATTCGCCTTACTGTGTtgatcttgggtattagagccttcttcatttTCGTATTCGCCTTACTGTGTTCGTATTCGCCTTACTGTGTCGACACCGAACGTGCGACAA
1885_chr15:23550001-23600000_Seq_567_14316-14345	GCGTCGTTATGGTGCAACGTTCGTATTCGCCTTACTGTGTgcttcaataagcagtttaagggattttactTCGTATTCGCCTTACTGTGTTCGTATTCGCCTTACTGTGTCGACACCGAACGTGCGACAA
1887_chr15:23550001-23600000_Seq_569_14387-14416	GCGTCGTTATGGTGCAACGTTCGTATTCGCCTTACTGTGTttttcttgcccttattatttgcttcattctTCGTATTCGCCTTACTGTGTTCGTATTCGCCTTACTGTGTCGACACCGAACGTGCGACAA
1890_chr15:23550001-23600000_Seq_572_14479-14508	GCGTCGTTATGGTGCAACGTTCGTATTCGCCTTACTGTGTTTCAGATATGTTTCCACTTTACAGATTTAGTCGTATTCGCCTTACTGTGTTCGTATTCGCCTTACTGTGTCGACACCGAACGTGCGACAA
1893_chr15:23550001-23600000_Seq_575_14576-14605	GCGTCGTTATGGTGCAACGTTCGTATTCGCCTTACTGTGTacagaagggcttcttattagaaacaaattgTCGTATTCGCCTTACTGTGTTCGTATTCGCCTTACTGTGTCGACACCGAACGTGCGACAA
1896_chr15:23550001-23600000_Seq_578_14650-14679	GCGTCGTTATGGTGCAACGTTCGTATTCGCCTTACTGTGTagagaataaagggaaaaacaaaattgtctcTCGTATTCGCCTTACTGTGTTCGTATTCGCCTTACTGTGTCGACACCGAACGTGCGACAA
1898_chr15:23550001-23600000_Seq_580_14710-14739	GCGTCGTTATGGTGCAACGTTCGTATTCGCCTTACTGTGTcagtatgcagtcatgatacgtactctcagcTCGTATTCGCCTTACTGTGTTCGTATTCGCCTTACTGTGTCGACACCGAACGTGCGACAA
1901_chr15:23550001-23600000_Seq_583_14810-14839	GCGTCGTTATGGTGCAACGTTCGTATTCGCCTTACTGTGTgaaattaaagaccattcctttgTGGATAATTCGTATTCGCCTTACTGTGTTCGTATTCGCCTTACTGTGTCGACACCGAACGTGCGACAA
1904_chr15:23550001-23600000_Seq_586_14870-14899	GCGTCGTTATGGTGCAACGTTCGTATTCGCCTTACTGTGTCTGCCACAACACAGCACAGATGGGGTTGAATCGTATTCGCCTTACTGTGTTCGTATTCGCCTTACTGTGTCGACACCGAACGTGCGACAA
1906_chr15:23550001-23600000_Seq_588_14910-14939	GCGTCGTTATGGTGCAACGTTCGTATTCGCCTTACTGTGTGGAAACAAAGGGCTGCCATGAATTAAACCATCGTATTCGCCTTACTGTGTTCGTATTCGCCTTACTGTGTCGACACCGAACGTGCGACAA
1909_chr15:23550001-23600000_Seq_591_14970-14999	GCGTCGTTATGGTGCAACGTTCGTATTCGCCTTACTGTGTGGGACAGTGTCTTATTAGGCCAGCATCAGGTCGTATTCGCCTTACTGTGTTCGTATTCGCCTTACTGTGTCGACACCGAACGTGCGACAA
1912_chr15:23550001-23600000_Seq_594_15030-15059	GCGTCGTTATGGTGCAACGTTCGTATTCGCCTTACTGTGTTGGGAAAATGAGCATAGTAATCACAATAAATCGTATTCGCCTTACTGTGTTCGTATTCGCCTTACTGTGTCGACACCGAACGTGCGACAA
1915_chr15:23550001-23600000_Seq_597_15090-15119	GCGTCGTTATGGTGCAACGTTCGTATTCGCCTTACTGTGTTCGGATCAGAAGTGCTCTCTGCTAATGCCTTCGTATTCGCCTTACTGTGTTCGTATTCGCCTTACTGTGTCGACACCGAACGTGCGACAA
1917_chr15:23550001-23600000_Seq_599_15130-15159	GCGTCGTTATGGTGCAACGTTCGTATTCGCCTTACTGTGTAAGCGTATCCAGTGTAAGCCCTCAGAAATCTCGTATTCGCCTTACTGTGTTCGTATTCGCCTTACTGTGTCGACACCGAACGTGCGACAA
1920_chr15:23550001-23600000_Seq_602_15211-15240	GCGTCGTTATGGTGCAACGTTCGTATTCGCCTTACTGTGTAAAAAGCTTCCTGCCGCGATCGGGCATTAATCGTATTCGCCTTACTGTGTTCGTATTCGCCTTACTGTGTCGACACCGAACGTGCGACAA
1923_chr15:23550001-23600000_Seq_605_15334-15363	GCGTCGTTATGGTGCAACGTTCGTATTCGCCTTACTGTGTTTTTTAAGGCAGACAGATACGAAAATACAATCGTATTCGCCTTACTGTGTTCGTATTCGCCTTACTGTGTCGACACCGAACGTGCGACAA
1926_chr15:23550001-23600000_Seq_608_15394-15423	GCGTCGTTATGGTGCAACGTTCGTATTCGCCTTACTGTGTTTAAAGTAAAACCTCATTCTCCTGAGGAAATCGTATTCGCCTTACTGTGTTCGTATTCGCCTTACTGTGTCGACACCGAACGTGCGACAA
1928_chr15:23550001-23600000_Seq_610_15434-15463	GCGTCGTTATGGTGCAACGTTCGTATTCGCCTTACTGTGTAGGGACTTAGGGACTGCCGGAACACAGCGATCGTATTCGCCTTACTGTGTTCGTATTCGCCTTACTGTGTCGACACCGAACGTGCGACAA
1931_chr15:23550001-23600000_Seq_613_15494-15523	GCGTCGTTATGGTGCAACGTTCGTATTCGCCTTACTGTGTGGGTTGGTCCCCGCCTGTGTGAACGAAAAATCGTATTCGCCTTACTGTGTTCGTATTCGCCTTACTGTGTCGACACCGAACGTGCGACAA
1934_chr15:23550001-23600000_Seq_616_15560-15589	GCGTCGTTATGGTGCAACGTTCGTATTCGCCTTACTGTGTAGAGCACGTACGTTGCCCCCACAGGAAGTGTCGTATTCGCCTTACTGTGTTCGTATTCGCCTTACTGTGTCGACACCGAACGTGCGACAA
1937_chr15:23550001-23600000_Seq_619_15623-15652	GCGTCGTTATGGTGCAACGTTCGTATTCGCCTTACTGTGTGAACACACAGTCAGAGGGACCCAAAAGCAGTCGTATTCGCCTTACTGTGTTCGTATTCGCCTTACTGTGTCGACACCGAACGTGCGACAA
1939_chr15:23550001-23600000_Seq_794_19645-19674	GCGTCGTTATGGTGCAACGTTCGTATTCGCCTTACTGTGTCACTCACCTTGCATGCCAGTGATAGTCAGGTCGTATTCGCCTTACTGTGTTCGTATTCGCCTTACTGTGTCGACACCGAACGTGCGACAA
1942_chr15:23550001-23600000_Seq_797_19707-19736	GCGTCGTTATGGTGCAACGTTCGTATTCGCCTTACTGTGTTCTTTCTCCTGCACGACTGCAGGGCAGGGATCGTATTCGCCTTACTGTGTTCGTATTCGCCTTACTGTGTCGACACCGAACGTGCGACAA
1945_chr15:23550001-23600000_Seq_800_19767-19796	GCGTCGTTATGGTGCAACGTTCGTATTCGCCTTACTGTGTACAGTCTTTGAGAGTGCACCATCTGGTCTCTCGTATTCGCCTTACTGTGTTCGTATTCGCCTTACTGTGTCGACACCGAACGTGCGACAA
1947_chr15:23550001-23600000_Seq_802_19807-19836	GCGTCGTTATGGTGCAACGTTCGTATTCGCCTTACTGTGTTGAAAGCTTTGCCACTATTTTCTGAGACTTTCGTATTCGCCTTACTGTGTTCGTATTCGCCTTACTGTGTCGACACCGAACGTGCGACAA
1950_chr15:23550001-23600000_Seq_805_19867-19896	GCGTCGTTATGGTGCAACGTTCGTATTCGCCTTACTGTGTGAAGTGTACATTTGGAGAAACTTTCCACAGTCGTATTCGCCTTACTGTGTTCGTATTCGCCTTACTGTGTCGACACCGAACGTGCGACAA
1953_chr15:23550001-23600000_Seq_808_19953-19982	GCGTCGTTATGGTGCAACGTTCGTATTCGCCTTACTGTGTCGATTGTCCTACTATAAATACTGAACTTTATCGTATTCGCCTTACTGTGTTCGTATTCGCCTTACTGTGTCGACACCGAACGTGCGACAA
1956_chr15:23550001-23600000_Seq_811_20013-20042	GCGTCGTTATGGTGCAACGTTCGTATTCGCCTTACTGTGTagaagcagagtcaggattctaactatccttTCGTATTCGCCTTACTGTGTTCGTATTCGCCTTACTGTGTCGACACCGAACGTGCGACAA
1958_chr15:23550001-23600000_Seq_813_20053-20082	GCGTCGTTATGGTGCAACGTTCGTATTCGCCTTACTGTGTttaagtaacttgcttagactgtgaaactgaTCGTATTCGCCTTACTGTGTTCGTATTCGCCTTACTGTGTCGACACCGAACGTGCGACAA
1961_chr15:23550001-23600000_Seq_816_20123-20152	GCGTCGTTATGGTGCAACGTTCGTATTCGCCTTACTGTGTcacaacaatcctgcaaaagtaggtggaactTCGTATTCGCCTTACTGTGTTCGTATTCGCCTTACTGTGTCGACACCGAACGTGCGACAA
1964_chr15:23550001-23600000_Seq_820_20237-20266	GCGTCGTTATGGTGCAACGTTCGTATTCGCCTTACTGTGTCTGTGCAATCACCTTTTCATGTCCAAAAATTCGTATTCGCCTTACTGTGTTCGTATTCGCCTTACTGTGTCGACACCGAACGTGCGACAA
1967_chr15:23550001-23600000_Seq_823_20299-20328	GCGTCGTTATGGTGCAACGTTCGTATTCGCCTTACTGTGTGATAACATTACATTAATACAAGTTCCAGAGTCGTATTCGCCTTACTGTGTTCGTATTCGCCTTACTGTGTCGACACCGAACGTGCGACAA
1969_chr15:23550001-23600000_Seq_825_20347-20376	GCGTCGTTATGGTGCAACGTTCGTATTCGCCTTACTGTGTTGAATGTGAGGGTAATATACCCCTTGCTTATCGTATTCGCCTTACTGTGTTCGTATTCGCCTTACTGTGTCGACACCGAACGTGCGACAA
1972_chr15:23550001-23600000_Seq_828_20504-20533	GCGTCGTTATGGTGCAACGTTCGTATTCGCCTTACTGTGTCCCATATATTCTAAAAATGTCCCTTTGTTATCGTATTCGCCTTACTGTGTTCGTATTCGCCTTACTGTGTCGACACCGAACGTGCGACAA
1975_chr15:23550001-23600000_Seq_832_20584-20613	GCGTCGTTATGGTGCAACGTTCGTATTCGCCTTACTGTGTACATTTCACCCAGACCTGGTGGCAGTAATATCGTATTCGCCTTACTGTGTTCGTATTCGCCTTACTGTGTCGACACCGAACGTGCGACAA
1978_chr15:23550001-23600000_Seq_835_20644-20673	GCGTCGTTATGGTGCAACGTTCGTATTCGCCTTACTGTGTAGGCTTCTTTGTTCCTGACTGCAGCAGGGGTCGTATTCGCCTTACTGTGTTCGTATTCGCCTTACTGTGTCGACACCGAACGTGCGACAA
1980_chr15:23550001-23600000_Seq_837_20684-20713	GCGTCGTTATGGTGCAACGTTCGTATTCGCCTTACTGTGTACACTCTGAATCACTCACAGAGCAGACCTTTCGTATTCGCCTTACTGTGTTCGTATTCGCCTTACTGTGTCGACACCGAACGTGCGACAA
1983_chr15:23550001-23600000_Seq_840_20744-20773	GCGTCGTTATGGTGCAACGTTCGTATTCGCCTTACTGTGTACCATTTTTGTGGACCCCAGGGCTGAGTCCTCGTATTCGCCTTACTGTGTTCGTATTCGCCTTACTGTGTCGACACCGAACGTGCGACAA
1986_chr15:23550001-23600000_Seq_843_20804-20833	GCGTCGTTATGGTGCAACGTTCGTATTCGCCTTACTGTGTGAAACCTAAGCAAAGCAAACCTGACTTGTTTCGTATTCGCCTTACTGTGTTCGTATTCGCCTTACTGTGTCGACACCGAACGTGCGACAA
1988_chr15:23550001-23600000_Seq_845_20844-20873	GCGTCGTTATGGTGCAACGTTCGTATTCGCCTTACTGTGTTATATTTGCATGTGTGGATATCCATCAAATTCGTATTCGCCTTACTGTGTTCGTATTCGCCTTACTGTGTCGACACCGAACGTGCGACAA
1991_chr15:23550001-23600000_Seq_848_20912-20941	GCGTCGTTATGGTGCAACGTTCGTATTCGCCTTACTGTGTGTGAGCCATGAGACAAAGTGATTTCCATATTCGTATTCGCCTTACTGTGTTCGTATTCGCCTTACTGTGTCGACACCGAACGTGCGACAA
1994_chr15:23550001-23600000_Seq_851_20972-21001	GCGTCGTTATGGTGCAACGTTCGTATTCGCCTTACTGTGTAGACCACAGACTGAAAATGTTTCCCTGTCATCGTATTCGCCTTACTGTGTTCGTATTCGCCTTACTGTGTCGACACCGAACGTGCGACAA
1997_chr15:23550001-23600000_Seq_854_21032-21061	GCGTCGTTATGGTGCAACGTTCGTATTCGCCTTACTGTGTAACAGAAACCATGCCTCTATGACGTTTGGATCGTATTCGCCTTACTGTGTTCGTATTCGCCTTACTGTGTCGACACCGAACGTGCGACAA
1999_chr15:23550001-23600000_Seq_856_21072-21101	GCGTCGTTATGGTGCAACGTTCGTATTCGCCTTACTGTGTCTATCCCGCACTGAAGTTGTAGTTTAGTATTCGTATTCGCCTTACTGTGTTCGTATTCGCCTTACTGTGTCGACACCGAACGTGCGACAA
2002_chr15:23550001-23600000_Seq_859_21132-21161	GCGTCGTTATGGTGCAACGTTCGTATTCGCCTTACTGTGTTTCTTTGCACTAGTACTGGCTTATTTCCCATCGTATTCGCCTTACTGTGTTCGTATTCGCCTTACTGTGTCGACACCGAACGTGCGACAA
2005_chr15:23550001-23600000_Seq_862_21270-21299	GCGTCGTTATGGTGCAACGTTCGTATTCGCCTTACTGTGTGCCTGTACTACTTTTATATCTAGATCTAATTCGTATTCGCCTTACTGTGTTCGTATTCGCCTTACTGTGTCGACACCGAACGTGCGACAA
2008_chr15:23550001-23600000_Seq_865_21330-21359	GCGTCGTTATGGTGCAACGTTCGTATTCGCCTTACTGTGTgtgagccactgtgcccagccGGTAGTAGCTTCGTATTCGCCTTACTGTGTTCGTATTCGCCTTACTGTGTCGACACCGAACGTGCGACAA
2010_chr15:23550001-23600000_Seq_878_21641-21670	GCGTCGTTATGGTGCAACGTTCGTATTCGCCTTACTGTGTGTGGTAGTAGCTTAttttcttttctttgttTCGTATTCGCCTTACTGTGTTCGTATTCGCCTTACTGTGTCGACACCGAACGTGCGACAA
2013_chr15:23550001-23600000_Seq_881_21733-21762	GCGTCGTTATGGTGCAACGTTCGTATTCGCCTTACTGTGTCGGTGTGTATAATTTGTCATTGTCATATTATCGTATTCGCCTTACTGTGTTCGTATTCGCCTTACTGTGTCGACACCGAACGTGCGACAA
2016_chr15:23550001-23600000_Seq_884_21831-21860	GCGTCGTTATGGTGCAACGTTCGTATTCGCCTTACTGTGTCTAGTTAATTAGGCTCTTTGTTTTTAAGACTCGTATTCGCCTTACTGTGTTCGTATTCGCCTTACTGTGTCGACACCGAACGTGCGACAA
2019_chr15:23550001-23600000_Seq_887_21912-21941	GCGTCGTTATGGTGCAACGTTCGTATTCGCCTTACTGTGTCTTTAGTtgtgtttgtatgtgtttgtgtatTCGTATTCGCCTTACTGTGTTCGTATTCGCCTTACTGTGTCGACACCGAACGTGCGACAA
2021_chr15:23550001-23600000_Seq_889_21977-22006	GCGTCGTTATGGTGCAACGTTCGTATTCGCCTTACTGTGTCCTTTACATTTTCATTCTCTGTTCAACAAATCGTATTCGCCTTACTGTGTTCGTATTCGCCTTACTGTGTCGACACCGAACGTGCGACAA
2024_chr15:23550001-23600000_Seq_892_22119-22148	GCGTCGTTATGGTGCAACGTTCGTATTCGCCTTACTGTGTGGATTTATTTCCCATTTCTTTAGTGTCTTTTCGTATTCGCCTTACTGTGTTCGTATTCGCCTTACTGTGTCGACACCGAACGTGCGACAA
2027_chr15:23550001-23600000_Seq_895_22212-22241	GCGTCGTTATGGTGCAACGTTCGTATTCGCCTTACTGTGTGTCTTCTGGATTGATGTTTGGAAATTTATATCGTATTCGCCTTACTGTGTTCGTATTCGCCTTACTGTGTCGACACCGAACGTGCGACAA
2030_chr15:23550001-23600000_Seq_898_22296-22325	GCGTCGTTATGGTGCAACGTTCGTATTCGCCTTACTGTGTTTTCTTTCTGTGTGGAGTAGGGAGTAAGTGTCGTATTCGCCTTACTGTGTTCGTATTCGCCTTACTGTGTCGACACCGAACGTGCGACAA
2032_chr15:23550001-23600000_Seq_900_22372-22401	GCGTCGTTATGGTGCAACGTTCGTATTCGCCTTACTGTGTctaagaAATGGTTTATACAGCATTGCAATATCGTATTCGCCTTACTGTGTTCGTATTCGCCTTACTGTGTCGACACCGAACGTGCGACAA
2035_chr15:23550001-23600000_Seq_906_22509-22538	GCGTCGTTATGGTGCAACGTTCGTATTCGCCTTACTGTGTaagaagatggtcatctatgaaccaagctgcTCGTATTCGCCTTACTGTGTTCGTATTCGCCTTACTGTGTCGACACCGAACGTGCGACAA
2038_chr15:23550001-23600000_Seq_909_22569-22598	GCGTCGTTATGGTGCAACGTTCGTATTCGCCTTACTGTGTACAGCACAattaaaggggtcccaacgaggtTCGTATTCGCCTTACTGTGTTCGTATTCGCCTTACTGTGTCGACACCGAACGTGCGACAA
2040_chr15:23550001-23600000_Seq_911_22678-22707	GCGTCGTTATGGTGCAACGTTCGTATTCGCCTTACTGTGTTGACATTGCTTCAAGCACTTCTCCACTGAATCGTATTCGCCTTACTGTGTTCGTATTCGCCTTACTGTGTCGACACCGAACGTGCGACAA
2043_chr15:23550001-23600000_Seq_914_22740-22769	GCGTCGTTATGGTGCAACGTTCGTATTCGCCTTACTGTGTCTCATCGTTTGTATTGTATTCTTGATGAACTCGTATTCGCCTTACTGTGTTCGTATTCGCCTTACTGTGTCGACACCGAACGTGCGACAA
2046_chr15:23550001-23600000_Seq_917_22800-22829	GCGTCGTTATGGTGCAACGTTCGTATTCGCCTTACTGTGTaATTTGCCAGCTCAAATGGTATATACAGCTTCGTATTCGCCTTACTGTGTTCGTATTCGCCTTACTGTGTCGACACCGAACGTGCGACAA
2049_chr15:23550001-23600000_Seq_920_22860-22889	GCGTCGTTATGGTGCAACGTTCGTATTCGCCTTACTGTGTtggagtcatgacggtggaggcctcatatgtTCGTATTCGCCTTACTGTGTTCGTATTCGCCTTACTGTGTCGACACCGAACGTGCGACAA
2051_chr15:23550001-23600000_Seq_922_22900-22929	GCGTCGTTATGGTGCAACGTTCGTATTCGCCTTACTGTGTtaaggtaatggtattaggagatgggaccttTCGTATTCGCCTTACTGTGTTCGTATTCGCCTTACTGTGTCGACACCGAACGTGCGACAA
2054_chr15:23550001-23600000_Seq_925_22960-22989	GCGTCGTTATGGTGCAACGTTCGTATTCGCCTTACTGTGTgcaGTTCTGTATActgaatgtctgtgtatcTCGTATTCGCCTTACTGTGTTCGTATTCGCCTTACTGTGTCGACACCGAACGTGCGACAA
2057_chr15:23550001-23600000_Seq_932_23100-23129	GCGTCGTTATGGTGCAACGTTCGTATTCGCCTTACTGTGTttcgtgaggagagcagcaagccattcatgaTCGTATTCGCCTTACTGTGTTCGTATTCGCCTTACTGTGTCGACACCGAACGTGCGACAA
2060_chr15:23550001-23600000_Seq_935_23160-23189	GCGTCGTTATGGTGCAACGTTCGTATTCGCCTTACTGTGTagcctaggctcttttcaacaaccagttctaTCGTATTCGCCTTACTGTGTTCGTATTCGCCTTACTGTGTCGACACCGAACGTGCGACAA
2062_chr15:23550001-23600000_Seq_940_23260-23289	GCGTCGTTATGGTGCAACGTTCGTATTCGCCTTACTGTGTtcactatgttgtctaggctggtccaaactcTCGTATTCGCCTTACTGTGTTCGTATTCGCCTTACTGTGTCGACACCGAACGTGCGACAA
2065_chr15:23550001-23600000_Seq_944_23367-23396	GCGTCGTTATGGTGCAACGTTCGTATTCGCCTTACTGTGTctgggctcaatcagtcctccctcctcaacaTCGTATTCGCCTTACTGTGTTCGTATTCGCCTTACTGTGTCGACACCGAACGTGCGACAA
2068_chr15:23550001-23600000_Seq_949_23493-23522	GCGTCGTTATGGTGCAACGTTCGTATTCGCCTTACTGTGTacatcatgaaagagaaggcaaaggagttgcTCGTATTCGCCTTACTGTGTTCGTATTCGCCTTACTGTGTCGACACCGAACGTGCGACAA
2071_chr15:23550001-23600000_Seq_953_23573-23602	GCGTCGTTATGGTGCAACGTTCGTATTCGCCTTACTGTGTagcgtggcaccaatatctgcttctggtgagTCGTATTCGCCTTACTGTGTTCGTATTCGCCTTACTGTGTCGACACCGAACGTGCGACAA
2073_chr15:23550001-23600000_Seq_965_23846-23875	GCGTCGTTATGGTGCAACGTTCGTATTCGCCTTACTGTGTtcagcgcttttggaggcccagtcgggtggaTCGTATTCGCCTTACTGTGTTCGTATTCGCCTTACTGTGTCGACACCGAACGTGCGACAA
2076_chr15:23550001-23600000_Seq_972_24045-24074	GCGTCGTTATGGTGCAACGTTCGTATTCGCCTTACTGTGTctgcttccaaatgtttaggtatttttatagTCGTATTCGCCTTACTGTGTTCGTATTCGCCTTACTGTGTCGACACCGAACGTGCGACAA
2079_chr15:23550001-23600000_Seq_977_24145-24174	GCGTCGTTATGGTGCAACGTTCGTATTCGCCTTACTGTGTtggtcacaaccagtctctaggaagttacaaTCGTATTCGCCTTACTGTGTTCGTATTCGCCTTACTGTGTCGACACCGAACGTGCGACAA
2081_chr15:23550001-23600000_Seq_982_24245-24274	GCGTCGTTATGGTGCAACGTTCGTATTCGCCTTACTGTGTttgctagggtataactttgcttcagttcccTCGTATTCGCCTTACTGTGTTCGTATTCGCCTTACTGTGTCGACACCGAACGTGCGACAA
2084_chr15:23550001-23600000_Seq_985_24305-24334	GCGTCGTTATGGTGCAACGTTCGTATTCGCCTTACTGTGTgtcactcttaagttcagctttccacaaagtTCGTATTCGCCTTACTGTGTTCGTATTCGCCTTACTGTGTCGACACCGAACGTGCGACAA
2087_chr15:23550001-23600000_Seq_990_24405-24434	GCGTCGTTATGGTGCAACGTTCGTATTCGCCTTACTGTGTgtccttcctttgctcccaatctgttgattgTCGTATTCGCCTTACTGTGTTCGTATTCGCCTTACTGTGTCGACACCGAACGTGCGACAA
2090_chr15:23550001-23600000_Seq_993_24465-24494	GCGTCGTTATGGTGCAACGTTCGTATTCGCCTTACTGTGTgcttgagttttccaaatttttatgctctgtTCGTATTCGCCTTACTGTGTTCGTATTCGCCTTACTGTGTCGACACCGAACGTGCGACAA
2092_chr15:23550001-23600000_Seq_995_24505-24534	GCGTCGTTATGGTGCAACGTTCGTATTCGCCTTACTGTGTctcctgaaaaatgctctttccttctcttttTCGTATTCGCCTTACTGTGTTCGTATTCGCCTTACTGTGTCGACACCGAACGTGCGACAA
2095_chr15:23550001-23600000_Seq_998_24588-24617	GCGTCGTTATGGTGCAACGTTCGTATTCGCCTTACTGTGTttctattaccaactggctctcttttacctgTCGTATTCGCCTTACTGTGTTCGTATTCGCCTTACTGTGTCGACACCGAACGTGCGACAA
2098_chr15:23550001-23600000_Seq_1003_24711-24740	GCGTCGTTATGGTGCAACGTTCGTATTCGCCTTACTGTGTaagattgcacagggcagcagcaccctgggcTCGTATTCGCCTTACTGTGTTCGTATTCGCCTTACTGTGTCGACACCGAACGTGCGACAA
2101_chr15:23550001-23600000_Seq_1006_24771-24800	GCGTCGTTATGGTGCAACGTTCGTATTCGCCTTACTGTGTcttgagccctttgagctttagctgtggtccTCGTATTCGCCTTACTGTGTTCGTATTCGCCTTACTGTGTCGACACCGAACGTGCGACAA
2103_chr15:23550001-23600000_Seq_1008_24811-24840	GCGTCGTTATGGTGCAACGTTCGTATTCGCCTTACTGTGTttacactttgcaccctctgaagcagtggtcTCGTATTCGCCTTACTGTGTTCGTATTCGCCTTACTGTGTCGACACCGAACGTGCGACAA
2106_chr15:23550001-23600000_Seq_1011_24871-24900	GCGTCGTTATGGTGCAACGTTCGTATTCGCCTTACTGTGTagctcagccaatctcacactgtgtgcctgcTCGTATTCGCCTTACTGTGTTCGTATTCGCCTTACTGTGTCGACACCGAACGTGCGACAA
2109_chr15:23550001-23600000_Seq_1014_24931-24960	GCGTCGTTATGGTGCAACGTTCGTATTCGCCTTACTGTGTcctcagctccactaggtggtgcctggtggaTCGTATTCGCCTTACTGTGTTCGTATTCGCCTTACTGTGTCGACACCGAACGTGCGACAA
2112_chr15:23550001-23600000_Seq_1018_25011-25040	GCGTCGTTATGGTGCAACGTTCGTATTCGCCTTACTGTGTgcttgcagcttttccatgctgagagtgcgtTCGTATTCGCCTTACTGTGTTCGTATTCGCCTTACTGTGTCGACACCGAACGTGCGACAA
2114_chr15:23550001-23600000_Seq_1020_25051-25080	GCGTCGTTATGGTGCAACGTTCGTATTCGCCTTACTGTGTgtgaagcccatgtggctcttatcatgtactTCGTATTCGCCTTACTGTGTTCGTATTCGCCTTACTGTGTCGACACCGAACGTGCGACAA
2117_chr15:23550001-23600000_Seq_1026_25171-25200	GCGTCGTTATGGTGCAACGTTCGTATTCGCCTTACTGTGTtataaaaacttaaagccccaaaatgttctcTCGTATTCGCCTTACTGTGTTCGTATTCGCCTTACTGTGTCGACACCGAACGTGCGACAA
2120_chr15:23550001-23600000_Seq_1029_25231-25260	GCGTCGTTATGGTGCAACGTTCGTATTCGCCTTACTGTGTaatcagcctaaagaaagaggtaatactcccTCGTATTCGCCTTACTGTGTTCGTATTCGCCTTACTGTGTCGACACCGAACGTGCGACAA
2122_chr15:23550001-23600000_Seq_1040_25472-25501	GCGTCGTTATGGTGCAACGTTCGTATTCGCCTTACTGTGTgcattctgccccgaccccctaaaactcaggTCGTATTCGCCTTACTGTGTTCGTATTCGCCTTACTGTGTCGACACCGAACGTGCGACAA
2125_chr15:23550001-23600000_Seq_1043_25532-25561	GCGTCGTTATGGTGCAACGTTCGTATTCGCCTTACTGTGTctggttatcaaattacaatatgagactcggTCGTATTCGCCTTACTGTGTTCGTATTCGCCTTACTGTGTCGACACCGAACGTGCGACAA
2128_chr15:23550001-23600000_Seq_1048_25632-25661	GCGTCGTTATGGTGCAACGTTCGTATTCGCCTTACTGTGTgagtaagaactcactcatctctgcaagaatTCGTATTCGCCTTACTGTGTTCGTATTCGCCTTACTGTGTCGACACCGAACGTGCGACAA
2131_chr15:23550001-23600000_Seq_1051_25692-25721	GCGTCGTTATGGTGCAACGTTCGTATTCGCCTTACTGTGTccagagagaagaggaggaaatgccaaggtcTCGTATTCGCCTTACTGTGTTCGTATTCGCCTTACTGTGTCGACACCGAACGTGCGACAA
2133_chr15:23550001-23600000_Seq_1053_25732-25761	GCGTCGTTATGGTGCAACGTTCGTATTCGCCTTACTGTGTaaagggaaggggagtaggcatcacatggcaTCGTATTCGCCTTACTGTGTTCGTATTCGCCTTACTGTGTCGACACCGAACGTGCGACAA
2136_chr15:23550001-23600000_Seq_1058_25832-25861	GCGTCGTTATGGTGCAACGTTCGTATTCGCCTTACTGTGTatacaggtttctttggcttatggttctggaTCGTATTCGCCTTACTGTGTTCGTATTCGCCTTACTGTGTCGACACCGAACGTGCGACAA
2139_chr15:23550001-23600000_Seq_1063_25935-25964	GCGTCGTTATGGTGCAACGTTCGTATTCGCCTTACTGTGTCATTCATAAGTTATATAGGTGCACCTTTATTCGTATTCGCCTTACTGTGTTCGTATTCGCCTTACTGTGTCGACACCGAACGTGCGACAA
2142_chr15:23550001-23600000_Seq_1067_26023-26052	GCGTCGTTATGGTGCAACGTTCGTATTCGCCTTACTGTGTcccatcataagtcaaggagcatgtgtattcTCGTATTCGCCTTACTGTGTTCGTATTCGCCTTACTGTGTCGACACCGAACGTGCGACAA
2144_chr15:23550001-23600000_Seq_1069_26087-26116	GCGTCGTTATGGTGCAACGTTCGTATTCGCCTTACTGTGTgggacattaaatgcattttcaactatgataTCGTATTCGCCTTACTGTGTTCGTATTCGCCTTACTGTGTCGACACCGAACGTGCGACAA
2147_chr15:23550001-23600000_Seq_1073_26180-26209	GCGTCGTTATGGTGCAACGTTCGTATTCGCCTTACTGTGTtgtatcaggacataaccccaatgtaaatcaTCGTATTCGCCTTACTGTGTTCGTATTCGCCTTACTGTGTCGACACCGAACGTGCGACAA
2150_chr15:23550001-23600000_Seq_1076_26240-26269	GCGTCGTTATGGTGCAACGTTCGTATTCGCCTTACTGTGTggcacagaggggccccagtttatgatggttTCGTATTCGCCTTACTGTGTTCGTATTCGCCTTACTGTGTCGACACCGAACGTGCGACAA
2153_chr15:23550001-23600000_Seq_1079_26300-26329	GCGTCGTTATGGTGCAACGTTCGTATTCGCCTTACTGTGTtcccagcctccataacaataagccaataaaTCGTATTCGCCTTACTGTGTTCGTATTCGCCTTACTGTGTCGACACCGAACGTGCGACAA
2155_chr15:23550001-23600000_Seq_1082_26360-26389	GCGTCGTTATGGTGCAACGTTCGTATTCGCCTTACTGTGTtgccacaggatggtgcaacaagaaggccttTCGTATTCGCCTTACTGTGTTCGTATTCGCCTTACTGTGTCGACACCGAACGTGCGACAA
2158_chr15:23550001-23600000_Seq_1085_26420-26449	GCGTCGTTATGGTGCAACGTTCGTATTCGCCTTACTGTGTtataaaagggcttgaagttttgagttcaggTCGTATTCGCCTTACTGTGTTCGTATTCGCCTTACTGTGTCGACACCGAACGTGCGACAA
2161_chr15:23550001-23600000_Seq_1089_26505-26534	GCGTCGTTATGGTGCAACGTTCGTATTCGCCTTACTGTGTcaatataacagtgttggaaggtaaggcctaTCGTATTCGCCTTACTGTGTTCGTATTCGCCTTACTGTGTCGACACCGAACGTGCGACAA
2163_chr15:23550001-23600000_Seq_1093_26659-26688	GCGTCGTTATGGTGCAACGTTCGTATTCGCCTTACTGTGTcagtgctattctttcactttctaatatttcTCGTATTCGCCTTACTGTGTTCGTATTCGCCTTACTGTGTCGACACCGAACGTGCGACAA
2166_chr15:23550001-23600000_Seq_1096_26786-26815	GCGTCGTTATGGTGCAACGTTCGTATTCGCCTTACTGTGTGGGAGatatatgaagttgcttatatgattaTCGTATTCGCCTTACTGTGTTCGTATTCGCCTTACTGTGTCGACACCGAACGTGCGACAA
2169_chr15:23550001-23600000_Seq_1099_27021-27050	GCGTCGTTATGGTGCAACGTTCGTATTCGCCTTACTGTGTctcattttcctcattaatttagttagtggtTCGTATTCGCCTTACTGTGTTCGTATTCGCCTTACTGTGTCGACACCGAACGTGCGACAA
2172_chr15:23550001-23600000_Seq_1102_27112-27141	GCGTCGTTATGGTGCAACGTTCGTATTCGCCTTACTGTGTCTAGTTGAGTGATGATTTCTTATGTTTGTTTCGTATTCGCCTTACTGTGTTCGTATTCGCCTTACTGTGTCGACACCGAACGTGCGACAA
2174_chr15:23550001-23600000_Seq_1104_27152-27181	GCGTCGTTATGGTGCAACGTTCGTATTCGCCTTACTGTGTCTGGAAAATCATCAATTTCAGTTTTGCAATTCGTATTCGCCTTACTGTGTTCGTATTCGCCTTACTGTGTCGACACCGAACGTGCGACAA
2177_chr15:23550001-23600000_Seq_1107_27255-27284	GCGTCGTTATGGTGCAACGTTCGTATTCGCCTTACTGTGTGACAATCCCTATTAAAATTGTGATAACCATTCGTATTCGCCTTACTGTGTTCGTATTCGCCTTACTGTGTCGACACCGAACGTGCGACAA
2180_chr15:23550001-23600000_Seq_1110_27318-27347	GCGTCGTTATGGTGCAACGTTCGTATTCGCCTTACTGTGTCCATTTTAAACTTCTGGATTGTGTTACATATCGTATTCGCCTTACTGTGTTCGTATTCGCCTTACTGTGTCGACACCGAACGTGCGACAA
2183_chr15:23550001-23600000_Seq_1113_27379-27408	GCGTCGTTATGGTGCAACGTTCGTATTCGCCTTACTGTGTGTTACACTCTGATATAAAATTACGTGTCATTCGTATTCGCCTTACTGTGTTCGTATTCGCCTTACTGTGTCGACACCGAACGTGCGACAA
2185_chr15:23550001-23600000_Seq_1116_27439-27468	GCGTCGTTATGGTGCAACGTTCGTATTCGCCTTACTGTGTAACTTGATCATTAGTTTGCATGTATTTGTGTCGTATTCGCCTTACTGTGTTCGTATTCGCCTTACTGTGTCGACACCGAACGTGCGACAA
2188_chr15:23550001-23600000_Seq_1120_27630-27659	GCGTCGTTATGGTGCAACGTTCGTATTCGCCTTACTGTGTCTTGTATACAATTGCATTGATTGATACATCTCGTATTCGCCTTACTGTGTTCGTATTCGCCTTACTGTGTCGACACCGAACGTGCGACAA
2191_chr15:23550001-23600000_Seq_1123_27709-27738	GCGTCGTTATGGTGCAACGTTCGTATTCGCCTTACTGTGTTTCAACATACAACATCTCAGAGAGAGGAATTCGTATTCGCCTTACTGTGTTCGTATTCGCCTTACTGTGTCGACACCGAACGTGCGACAA
2194_chr15:23550001-23600000_Seq_1126_27923-27952	GCGTCGTTATGGTGCAACGTTCGTATTCGCCTTACTGTGTGGCACTTAACACATTTTTAAATTTATTCCCTCGTATTCGCCTTACTGTGTTCGTATTCGCCTTACTGTGTCGACACCGAACGTGCGACAA
2196_chr15:23550001-23600000_Seq_1128_27996-28025	GCGTCGTTATGGTGCAACGTTCGTATTCGCCTTACTGTGTGGTGATGTTAAAGTTCCCTATCAAATTATATCGTATTCGCCTTACTGTGTTCGTATTCGCCTTACTGTGTCGACACCGAACGTGCGACAA
2199_chr15:23550001-23600000_Seq_1132_28111-28140	GCGTCGTTATGGTGCAACGTTCGTATTCGCCTTACTGTGTttttctgcattgatgattgttgtgattgagTCGTATTCGCCTTACTGTGTTCGTATTCGCCTTACTGTGTCGACACCGAACGTGCGACAA
2202_chr15:23550001-23600000_Seq_1136_28195-28224	GCGTCGTTATGGTGCAACGTTCGTATTCGCCTTACTGTGTtagccttggaattaaattggaggatgcccaTCGTATTCGCCTTACTGTGTTCGTATTCGCCTTACTGTGTCGACACCGAACGTGCGACAA
2204_chr15:23550001-23600000_Seq_1139_28278-28307	GCGTCGTTATGGTGCAACGTTCGTATTCGCCTTACTGTGTactttgtgactggtgtctagggagtgggggTCGTATTCGCCTTACTGTGTTCGTATTCGCCTTACTGTGTCGACACCGAACGTGCGACAA
2207_chr15:23550001-23600000_Seq_1143_28358-28387	GCGTCGTTATGGTGCAACGTTCGTATTCGCCTTACTGTGTcagcaaattaatcaaatccaaagagtgggtTCGTATTCGCCTTACTGTGTTCGTATTCGCCTTACTGTGTCGACACCGAACGTGCGACAA
2210_chr15:23550001-23600000_Seq_1152_28553-28582	GCGTCGTTATGGTGCAACGTTCGTATTCGCCTTACTGTGTgagcactgggctcaaaggcttctggatagcTCGTATTCGCCTTACTGTGTTCGTATTCGCCTTACTGTGTCGACACCGAACGTGCGACAA
2213_chr15:23550001-23600000_Seq_1157_28675-28704	GCGTCGTTATGGTGCAACGTTCGTATTCGCCTTACTGTGTggattccaatctcccccaacctttctgatgTCGTATTCGCCTTACTGTGTTCGTATTCGCCTTACTGTGTCGACACCGAACGTGCGACAA
2215_chr15:23550001-23600000_Seq_1161_28755-28784	GCGTCGTTATGGTGCAACGTTCGTATTCGCCTTACTGTGTttaggcttcaggagcaggacttaggaaagaTCGTATTCGCCTTACTGTGTTCGTATTCGCCTTACTGTGTCGACACCGAACGTGCGACAA
2218_chr15:23550001-23600000_Seq_1167_28899-28928	GCGTCGTTATGGTGCAACGTTCGTATTCGCCTTACTGTGTGTTATAAAGAACTAGTTTGTACTTGTGTTGTCGTATTCGCCTTACTGTGTTCGTATTCGCCTTACTGTGTCGACACCGAACGTGCGACAA
2221_chr15:23550001-23600000_Seq_1170_28985-29014	GCGTCGTTATGGTGCAACGTTCGTATTCGCCTTACTGTGTGGATGCTTTTCAATTCTAAAATATTCTGGTTCGTATTCGCCTTACTGTGTTCGTATTCGCCTTACTGTGTCGACACCGAACGTGCGACAA
2224_chr15:23550001-23600000_Seq_1173_29045-29074	GCGTCGTTATGGTGCAACGTTCGTATTCGCCTTACTGTGTCTGCTTTTCATATTGCTGGCAATATGACACTCGTATTCGCCTTACTGTGTTCGTATTCGCCTTACTGTGTCGACACCGAACGTGCGACAA
2226_chr15:23550001-23600000_Seq_1175_29104-29133	GCGTCGTTATGGTGCAACGTTCGTATTCGCCTTACTGTGTCATATGTCCATTTATGAACCTTTTTAGCATTCGTATTCGCCTTACTGTGTTCGTATTCGCCTTACTGTGTCGACACCGAACGTGCGACAA
2229_chr15:23550001-23600000_Seq_1178_29179-29208	GCGTCGTTATGGTGCAACGTTCGTATTCGCCTTACTGTGTCCCATGACTCCTGAATTCACCCGACAACCTTCGTATTCGCCTTACTGTGTTCGTATTCGCCTTACTGTGTCGACACCGAACGTGCGACAA
2232_chr15:23550001-23600000_Seq_1181_29250-29279	GCGTCGTTATGGTGCAACGTTCGTATTCGCCTTACTGTGTCTGGTTTTGTATTTGTCTGAAATTTTGATGTCGTATTCGCCTTACTGTGTTCGTATTCGCCTTACTGTGTCGACACCGAACGTGCGACAA
2235_chr15:23550001-23600000_Seq_1184_29366-29395	GCGTCGTTATGGTGCAACGTTCGTATTCGCCTTACTGTGTgtagaccctATGCAGTTATTGCTACAATTATCGTATTCGCCTTACTGTGTTCGTATTCGCCTTACTGTGTCGACACCGAACGTGCGACAA
2237_chr15:23550001-23600000_Seq_1186_29406-29435	GCGTCGTTATGGTGCAACGTTCGTATTCGCCTTACTGTGTtaaatgggataaaccatctcagaacagcgcTCGTATTCGCCTTACTGTGTTCGTATTCGCCTTACTGTGTCGACACCGAACGTGCGACAA
2240_chr15:23550001-23600000_Seq_1189_29466-29495	GCGTCGTTATGGTGCAACGTTCGTATTCGCCTTACTGTGTagtgctctcagctgctacaaggggttaataTCGTATTCGCCTTACTGTGTTCGTATTCGCCTTACTGTGTCGACACCGAACGTGCGACAA
2243_chr15:23550001-23600000_Seq_1192_29526-29555	GCGTCGTTATGGTGCAACGTTCGTATTCGCCTTACTGTGTCAGATGGGCGAGTCtattaactgtgtgccaTCGTATTCGCCTTACTGTGTTCGTATTCGCCTTACTGTGTCGACACCGAACGTGCGACAA
2245_chr15:23550001-23600000_Seq_1194_29566-29595	GCGTCGTTATGGTGCAACGTTCGTATTCGCCTTACTGTGTTTGTAAGGCAGAGCAATTGGTGTGAGTCCCTCGTATTCGCCTTACTGTGTTCGTATTCGCCTTACTGTGTCGACACCGAACGTGCGACAA
2248_chr15:23550001-23600000_Seq_1197_29627-29656	GCGTCGTTATGGTGCAACGTTCGTATTCGCCTTACTGTGTTTTTTAGGGGTGGGGAAGTTGCTCATGTCATCGTATTCGCCTTACTGTGTTCGTATTCGCCTTACTGTGTCGACACCGAACGTGCGACAA
2251_chr15:23550001-23600000_Seq_1200_29751-29780	GCGTCGTTATGGTGCAACGTTCGTATTCGCCTTACTGTGTATATGCATTTTGTTTATGTGCAAGAGGTATTCGTATTCGCCTTACTGTGTTCGTATTCGCCTTACTGTGTCGACACCGAACGTGCGACAA
2254_chr15:23550001-23600000_Seq_1203_29827-29856	GCGTCGTTATGGTGCAACGTTCGTATTCGCCTTACTGTGTgagaggaaactgaaacttcatcaattttaaTCGTATTCGCCTTACTGTGTTCGTATTCGCCTTACTGTGTCGACACCGAACGTGCGACAA
2256_chr15:23550001-23600000_Seq_1205_29867-29896	GCGTCGTTATGGTGCAACGTTCGTATTCGCCTTACTGTGTaacagagtgtgtttttaaacatctgggtttTCGTATTCGCCTTACTGTGTTCGTATTCGCCTTACTGTGTCGACACCGAACGTGCGACAA
2259_chr15:23550001-23600000_Seq_1208_29927-29956	GCGTCGTTATGGTGCAACGTTCGTATTCGCCTTACTGTGTtgttcctccatggaaattgtaccaattataTCGTATTCGCCTTACTGTGTTCGTATTCGCCTTACTGTGTCGACACCGAACGTGCGACAA
2262_chr15:23550001-23600000_Seq_1211_29987-30016	GCGTCGTTATGGTGCAACGTTCGTATTCGCCTTACTGTGTaatagaatggcttggtcaatgtgtatgcatTCGTATTCGCCTTACTGTGTTCGTATTCGCCTTACTGTGTCGACACCGAACGTGCGACAA
2265_chr15:23550001-23600000_Seq_1214_30064-30093	GCGTCGTTATGGTGCAACGTTCGTATTCGCCTTACTGTGTTGCAGGGTGAGattaacaaacttgtacctgTCGTATTCGCCTTACTGTGTTCGTATTCGCCTTACTGTGTCGACACCGAACGTGCGACAA
2267_chr15:23550001-23600000_Seq_1216_30104-30133	GCGTCGTTATGGTGCAACGTTCGTATTCGCCTTACTGTGTgtgttgcaattatagatgtgagccactgcaTCGTATTCGCCTTACTGTGTTCGTATTCGCCTTACTGTGTCGACACCGAACGTGCGACAA
2270_chr15:23550001-23600000_Seq_1223_30244-30273	GCGTCGTTATGGTGCAACGTTCGTATTCGCCTTACTGTGTagttgggaccacaggtgtgcaccaccagccTCGTATTCGCCTTACTGTGTTCGTATTCGCCTTACTGTGTCGACACCGAACGTGCGACAA
2273_chr15:23550001-23600000_Seq_1228_30344-30373	GCGTCGTTATGGTGCAACGTTCGTATTCGCCTTACTGTGTtggccctgtcatacgggctggaaaacagtgTCGTATTCGCCTTACTGTGTTCGTATTCGCCTTACTGTGTCGACACCGAACGTGCGACAA
2276_chr15:23550001-23600000_Seq_1231_30511-30540	GCGTCGTTATGGTGCAACGTTCGTATTCGCCTTACTGTGTgcaccatcttcactcaTATTTTTATATGTATCGTATTCGCCTTACTGTGTTCGTATTCGCCTTACTGTGTCGACACCGAACGTGCGACAA
2278_chr15:23550001-23600000_Seq_1233_30553-30582	GCGTCGTTATGGTGCAACGTTCGTATTCGCCTTACTGTGTtttgacacagtctggctctgtcacgctggcTCGTATTCGCCTTACTGTGTTCGTATTCGCCTTACTGTGTCGACACCGAACGTGCGACAA
2281_chr15:23550001-23600000_Seq_1236_30709-30738	GCGTCGTTATGGTGCAACGTTCGTATTCGCCTTACTGTGTCACAATATTTCCAGGTCAGCCCAAGCAAATTCGTATTCGCCTTACTGTGTTCGTATTCGCCTTACTGTGTCGACACCGAACGTGCGACAA
2284_chr15:23550001-23600000_Seq_1246_30937-30966	GCGTCGTTATGGTGCAACGTTCGTATTCGCCTTACTGTGTgggattgcacacgcccaccaacacacccagTCGTATTCGCCTTACTGTGTTCGTATTCGCCTTACTGTGTCGACACCGAACGTGCGACAA
2286_chr15:23550001-23600000_Seq_1252_31058-31087	GCGTCGTTATGGTGCAACGTTCGTATTCGCCTTACTGTGTtcctcgagacagggtcttggctctgtcaccTCGTATTCGCCTTACTGTGTTCGTATTCGCCTTACTGTGTCGACACCGAACGTGCGACAA
2289_chr15:23550001-23600000_Seq_1255_31134-31163	GCGTCGTTATGGTGCAACGTTCGTATTCGCCTTACTGTGTTGTATGATTTTTCAGGAGACTTATGCACACTCGTATTCGCCTTACTGTGTTCGTATTCGCCTTACTGTGTCGACACCGAACGTGCGACAA
2292_chr15:23550001-23600000_Seq_1258_31285-31314	GCGTCGTTATGGTGCAACGTTCGTATTCGCCTTACTGTGTcacacacacatattctcctgtatttatataTCGTATTCGCCTTACTGTGTTCGTATTCGCCTTACTGTGTCGACACCGAACGTGCGACAA
2295_chr15:23550001-23600000_Seq_1261_31384-31413	GCGTCGTTATGGTGCAACGTTCGTATTCGCCTTACTGTGTCAAAAACTCACACTCACAAAGGAACGAAATTCGTATTCGCCTTACTGTGTTCGTATTCGCCTTACTGTGTCGACACCGAACGTGCGACAA
2297_chr15:23550001-23600000_Seq_1263_31424-31453	GCGTCGTTATGGTGCAACGTTCGTATTCGCCTTACTGTGTTTCTCACTGCAGTCTAATCAAACACATTTTTCGTATTCGCCTTACTGTGTTCGTATTCGCCTTACTGTGTCGACACCGAACGTGCGACAA
2300_chr15:23550001-23600000_Seq_1266_31500-31529	GCGTCGTTATGGTGCAACGTTCGTATTCGCCTTACTGTGTTGTGGCATCATAGTGATTTAGCAGCAAAAATCGTATTCGCCTTACTGTGTTCGTATTCGCCTTACTGTGTCGACACCGAACGTGCGACAA
2303_chr15:23550001-23600000_Seq_1269_31560-31589	GCGTCGTTATGGTGCAACGTTCGTATTCGCCTTACTGTGTACAGTCCCAAGCCTGATCAGTAAACCTATGTCGTATTCGCCTTACTGTGTTCGTATTCGCCTTACTGTGTCGACACCGAACGTGCGACAA
2306_chr15:23550001-23600000_Seq_1272_31620-31649	GCGTCGTTATGGTGCAACGTTCGTATTCGCCTTACTGTGTAATATTGAGTAGAAAGACCTGCATATCTGATCGTATTCGCCTTACTGTGTTCGTATTCGCCTTACTGTGTCGACACCGAACGTGCGACAA
2308_chr15:23550001-23600000_Seq_1274_31660-31689	GCGTCGTTATGGTGCAACGTTCGTATTCGCCTTACTGTGTCAGAAAAACATCTTGTTTAGAGAGGCTCAGTCGTATTCGCCTTACTGTGTTCGTATTCGCCTTACTGTGTCGACACCGAACGTGCGACAA
2311_chr15:23550001-23600000_Seq_1277_31804-31833	GCGTCGTTATGGTGCAACGTTCGTATTCGCCTTACTGTGTGGATTACTTGTGTTTAATTTCCAATATCACTCGTATTCGCCTTACTGTGTTCGTATTCGCCTTACTGTGTCGACACCGAACGTGCGACAA
2314_chr15:23550001-23600000_Seq_1281_31958-31987	GCGTCGTTATGGTGCAACGTTCGTATTCGCCTTACTGTGTctcttaaatttccgagtcattgattgttttTCGTATTCGCCTTACTGTGTTCGTATTCGCCTTACTGTGTCGACACCGAACGTGCGACAA
2317_chr15:23550001-23600000_Seq_1289_32158-32187	GCGTCGTTATGGTGCAACGTTCGTATTCGCCTTACTGTGTtttgtatttcgtgagacagggtttcaccatTCGTATTCGCCTTACTGTGTTCGTATTCGCCTTACTGTGTCGACACCGAACGTGCGACAA
2319_chr15:23550001-23600000_Seq_1298_32398-32427	GCGTCGTTATGGTGCAACGTTCGTATTCGCCTTACTGTGTCTGCTAAGTTTGTAGGCTCATGGATTTCCCTCGTATTCGCCTTACTGTGTTCGTATTCGCCTTACTGTGTCGACACCGAACGTGCGACAA
2322_chr15:23550001-23600000_Seq_1301_32481-32510	GCGTCGTTATGGTGCAACGTTCGTATTCGCCTTACTGTGTACAATTAGGTCCACTGTATTCATCGTGTCATCGTATTCGCCTTACTGTGTTCGTATTCGCCTTACTGTGTCGACACCGAACGTGCGACAA
2325_chr15:23550001-23600000_Seq_1304_32541-32570	GCGTCGTTATGGTGCAACGTTCGTATTCGCCTTACTGTGTCTACTGTCATACCATGAGAAGTGACTTTTCTCGTATTCGCCTTACTGTGTTCGTATTCGCCTTACTGTGTCGACACCGAACGTGCGACAA
2328_chr15:23550001-23600000_Seq_1307_32614-32643	GCGTCGTTATGGTGCAACGTTCGTATTCGCCTTACTGTGTTATGTGATCTATTTTTATCAGAGAGGTCATTCGTATTCGCCTTACTGTGTTCGTATTCGCCTTACTGTGTCGACACCGAACGTGCGACAA
2330_chr15:23550001-23600000_Seq_1309_32654-32683	GCGTCGTTATGGTGCAACGTTCGTATTCGCCTTACTGTGTTTATCAACTCATCTGCACATTGCCTACTACTCGTATTCGCCTTACTGTGTTCGTATTCGCCTTACTGTGTCGACACCGAACGTGCGACAA
2333_chr15:23550001-23600000_Seq_1317_32840-32869	GCGTCGTTATGGTGCAACGTTCGTATTCGCCTTACTGTGTtcgggagactgtgccaggagaattgcttgaTCGTATTCGCCTTACTGTGTTCGTATTCGCCTTACTGTGTCGACACCGAACGTGCGACAA
2336_chr15:23550001-23600000_Seq_1327_33059-33088	GCGTCGTTATGGTGCAACGTTCGTATTCGCCTTACTGTGTttctcagtgtgggattgacattgagcaTTGTCGTATTCGCCTTACTGTGTTCGTATTCGCCTTACTGTGTCGACACCGAACGTGCGACAA
2338_chr15:23550001-23600000_Seq_1329_33099-33128	GCGTCGTTATGGTGCAACGTTCGTATTCGCCTTACTGTGTgaatatagataacccaagttcaaatcctggTCGTATTCGCCTTACTGTGTTCGTATTCGCCTTACTGTGTCGACACCGAACGTGCGACAA
2341_chr15:23550001-23600000_Seq_1332_33159-33188	GCGTCGTTATGGTGCAACGTTCGTATTCGCCTTACTGTGTCAACACCCTCCAGATcaaaagggtagcaggTCGTATTCGCCTTACTGTGTTCGTATTCGCCTTACTGTGTCGACACCGAACGTGCGACAA
2344_chr15:23550001-23600000_Seq_1335_33219-33248	GCGTCGTTATGGTGCAACGTTCGTATTCGCCTTACTGTGTTCTACAATGAAGAAAATGTGCTTTTCTCCATCGTATTCGCCTTACTGTGTTCGTATTCGCCTTACTGTGTCGACACCGAACGTGCGACAA
2347_chr15:23550001-23600000_Seq_1338_33279-33308	GCGTCGTTATGGTGCAACGTTCGTATTCGCCTTACTGTGTCAGGTGGATCTGGCAGTCTTCTATTCCCAGTCGTATTCGCCTTACTGTGTTCGTATTCGCCTTACTGTGTCGACACCGAACGTGCGACAA
2349_chr15:23550001-23600000_Seq_1340_33319-33348	GCGTCGTTATGGTGCAACGTTCGTATTCGCCTTACTGTGTGTAACCTTGTTTAGAGGAAGATGAGATGAATCGTATTCGCCTTACTGTGTTCGTATTCGCCTTACTGTGTCGACACCGAACGTGCGACAA
2352_chr15:23550001-23600000_Seq_1343_33379-33408	GCGTCGTTATGGTGCAACGTTCGTATTCGCCTTACTGTGTGCAAGGAGAGTGCTGTTGTATGAATTTGAGTCGTATTCGCCTTACTGTGTTCGTATTCGCCTTACTGTGTCGACACCGAACGTGCGACAA
2355_chr15:23550001-23600000_Seq_1346_33439-33468	GCGTCGTTATGGTGCAACGTTCGTATTCGCCTTACTGTGTAAATAAGCAAAGCCACAGTTAAAGAGACTATCGTATTCGCCTTACTGTGTTCGTATTCGCCTTACTGTGTCGACACCGAACGTGCGACAA
2358_chr15:23550001-23600000_Seq_1349_33509-33538	GCGTCGTTATGGTGCAACGTTCGTATTCGCCTTACTGTGTctcagaatacccaaattaTTACCCCTAGTTTCGTATTCGCCTTACTGTGTTCGTATTCGCCTTACTGTGTCGACACCGAACGTGCGACAA
2360_chr15:23550001-23600000_Seq_1352_33569-33598	GCGTCGTTATGGTGCAACGTTCGTATTCGCCTTACTGTGTctcatgggaatgccctcaagtaaaatccttTCGTATTCGCCTTACTGTGTTCGTATTCGCCTTACTGTGTCGACACCGAACGTGCGACAA
2363_chr15:23550001-23600000_Seq_1355_33629-33658	GCGTCGTTATGGTGCAACGTTCGTATTCGCCTTACTGTGTacagacatgcagtgtggtccaaagtatatcTCGTATTCGCCTTACTGTGTTCGTATTCGCCTTACTGTGTCGACACCGAACGTGCGACAA
2366_chr15:23550001-23600000_Seq_1358_33689-33718	GCGTCGTTATGGTGCAACGTTCGTATTCGCCTTACTGTGTtactagattacatagcagtgcttctatcctTCGTATTCGCCTTACTGTGTTCGTATTCGCCTTACTGTGTCGACACCGAACGTGCGACAA
2369_chr15:23550001-23600000_Seq_1361_33749-33778	GCGTCGTTATGGTGCAACGTTCGTATTCGCCTTACTGTGTgagagatataaaactccagtaatggcagacTCGTATTCGCCTTACTGTGTTCGTATTCGCCTTACTGTGTCGACACCGAACGTGCGACAA
2371_chr15:23550001-23600000_Seq_1363_33789-33818	GCGTCGTTATGGTGCAACGTTCGTATTCGCCTTACTGTGTtgctcccagctaataactaaatgtgaccagTCGTATTCGCCTTACTGTGTTCGTATTCGCCTTACTGTGTCGACACCGAACGTGCGACAA
2374_chr15:23550001-23600000_Seq_1366_33849-33878	GCGTCGTTATGGTGCAACGTTCGTATTCGCCTTACTGTGTccagttagtattctctgaaatccattaccaTCGTATTCGCCTTACTGTGTTCGTATTCGCCTTACTGTGTCGACACCGAACGTGCGACAA
2377_chr15:23550001-23600000_Seq_1369_33909-33938	GCGTCGTTATGGTGCAACGTTCGTATTCGCCTTACTGTGTGGAACATTCAATAccttctggatcattcaaTCGTATTCGCCTTACTGTGTTCGTATTCGCCTTACTGTGTCGACACCGAACGTGCGACAA
2379_chr15:23550001-23600000_Seq_1371_33949-33978	GCGTCGTTATGGTGCAACGTTCGTATTCGCCTTACTGTGTggagaatcctaatacaATCACCATGCCTAGTCGTATTCGCCTTACTGTGTTCGTATTCGCCTTACTGTGTCGACACCGAACGTGCGACAA
2382_chr15:23550001-23600000_Seq_1374_34009-34038	GCGTCGTTATGGTGCAACGTTCGTATTCGCCTTACTGTGTtgataaAAGTTCTGTTTCTCTGAAGAATCCTCGTATTCGCCTTACTGTGTTCGTATTCGCCTTACTGTGTCGACACCGAACGTGCGACAA
2385_chr15:23550001-23600000_Seq_1378_34089-34118	GCGTCGTTATGGTGCAACGTTCGTATTCGCCTTACTGTGTtcttcctggcaatagttgttgccccagcaaTCGTATTCGCCTTACTGTGTTCGTATTCGCCTTACTGTGTCGACACCGAACGTGCGACAA
2388_chr15:23550001-23600000_Seq_1382_34169-34198	GCGTCGTTATGGTGCAACGTTCGTATTCGCCTTACTGTGTctcctcagttttacttggttggggagacggTCGTATTCGCCTTACTGTGTTCGTATTCGCCTTACTGTGTCGACACCGAACGTGCGACAA
2390_chr15:23550001-23600000_Seq_1384_34209-34238	GCGTCGTTATGGTGCAACGTTCGTATTCGCCTTACTGTGTctctctaattcctgtttttccacgtttcccTCGTATTCGCCTTACTGTGTTCGTATTCGCCTTACTGTGTCGACACCGAACGTGCGACAA
2393_chr15:23550001-23600000_Seq_1389_34309-34338	GCGTCGTTATGGTGCAACGTTCGTATTCGCCTTACTGTGTccttaggaaacaaaccctctggcaaggaacTCGTATTCGCCTTACTGTGTTCGTATTCGCCTTACTGTGTCGACACCGAACGTGCGACAA
2396_chr15:23550001-23600000_Seq_1392_34379-34408	GCGTCGTTATGGTGCAACGTTCGTATTCGCCTTACTGTGTtggaataaacagaaattgaccctctctagtTCGTATTCGCCTTACTGTGTTCGTATTCGCCTTACTGTGTCGACACCGAACGTGCGACAA
2399_chr15:23550001-23600000_Seq_1395_34454-34483	GCGTCGTTATGGTGCAACGTTCGTATTCGCCTTACTGTGTacattgagggacggataaaGGTGGGGGACTTCGTATTCGCCTTACTGTGTTCGTATTCGCCTTACTGTGTCGACACCGAACGTGCGACAA
2401_chr15:23550001-23600000_Seq_1397_34494-34523	GCGTCGTTATGGTGCAACGTTCGTATTCGCCTTACTGTGTcagcatgaggcagagagaaggatcgacaacTCGTATTCGCCTTACTGTGTTCGTATTCGCCTTACTGTGTCGACACCGAACGTGCGACAA
2404_chr15:23550001-23600000_Seq_1401_34574-34603	GCGTCGTTATGGTGCAACGTTCGTATTCGCCTTACTGTGTAattatggttcttcagcaagctggatgctaTCGTATTCGCCTTACTGTGTTCGTATTCGCCTTACTGTGTCGACACCGAACGTGCGACAA
2407_chr15:23550001-23600000_Seq_1406_34674-34703	GCGTCGTTATGGTGCAACGTTCGTATTCGCCTTACTGTGTaccacagctttctgaaagtggatgtgatgaTCGTATTCGCCTTACTGTGTTCGTATTCGCCTTACTGTGTCGACACCGAACGTGCGACAA
2410_chr15:23550001-23600000_Seq_1409_34734-34763	GCGTCGTTATGGTGCAACGTTCGTATTCGCCTTACTGTGTtaagaaatcattaagggaccacacactttcTCGTATTCGCCTTACTGTGTTCGTATTCGCCTTACTGTGTCGACACCGAACGTGCGACAA
2412_chr15:23550001-23600000_Seq_1412_34794-34823	GCGTCGTTATGGTGCAACGTTCGTATTCGCCTTACTGTGTtggtcttttgaacccttaaagacagccttaTCGTATTCGCCTTACTGTGTTCGTATTCGCCTTACTGTGTCGACACCGAACGTGCGACAA
2415_chr15:23550001-23600000_Seq_1419_34943-34972	GCGTCGTTATGGTGCAACGTTCGTATTCGCCTTACTGTGTgggatattaaccttacgttttggaaataaaTCGTATTCGCCTTACTGTGTTCGTATTCGCCTTACTGTGTCGACACCGAACGTGCGACAA
2418_chr15:23550001-23600000_Seq_1425_35063-35092	GCGTCGTTATGGTGCAACGTTCGTATTCGCCTTACTGTGTgccactgcaagatctgtttactctgagaggTCGTATTCGCCTTACTGTGTTCGTATTCGCCTTACTGTGTCGACACCGAACGTGCGACAA
2420_chr15:23550001-23600000_Seq_1430_35163-35192	GCGTCGTTATGGTGCAACGTTCGTATTCGCCTTACTGTGTcccacggctcactactgaacaattgcagatTCGTATTCGCCTTACTGTGTTCGTATTCGCCTTACTGTGTCGACACCGAACGTGCGACAA
2423_chr15:23550001-23600000_Seq_1435_35288-35317	GCGTCGTTATGGTGCAACGTTCGTATTCGCCTTACTGTGTattggtatcgacagcttcctgaagacccttTCGTATTCGCCTTACTGTGTTCGTATTCGCCTTACTGTGTCGACACCGAACGTGCGACAA
2426_chr15:23550001-23600000_Seq_1440_35388-35417	GCGTCGTTATGGTGCAACGTTCGTATTCGCCTTACTGTGTgtatctctgagacctatggtttccaatgtgTCGTATTCGCCTTACTGTGTTCGTATTCGCCTTACTGTGTCGACACCGAACGTGCGACAA
2429_chr15:23550001-23600000_Seq_1447_35528-35557	GCGTCGTTATGGTGCAACGTTCGTATTCGCCTTACTGTGTctgagttggatctaaaagctaggccaaactTCGTATTCGCCTTACTGTGTTCGTATTCGCCTTACTGTGTCGACACCGAACGTGCGACAA
2431_chr15:23550001-23600000_Seq_1450_35616-35645	GCGTCGTTATGGTGCAACGTTCGTATTCGCCTTACTGTGTatgaaatgcaaacttcatagggaaaagtgaTCGTATTCGCCTTACTGTGTTCGTATTCGCCTTACTGTGTCGACACCGAACGTGCGACAA
2434_chr15:23550001-23600000_Seq_1458_35776-35805	GCGTCGTTATGGTGCAACGTTCGTATTCGCCTTACTGTGTgtacacctgttattggattaacctttgactTCGTATTCGCCTTACTGTGTTCGTATTCGCCTTACTGTGTCGACACCGAACGTGCGACAA
2437_chr15:23550001-23600000_Seq_1464_35927-35956	GCGTCGTTATGGTGCAACGTTCGTATTCGCCTTACTGTGTctacaataattcttgctgcacgttgtacaaTCGTATTCGCCTTACTGTGTTCGTATTCGCCTTACTGTGTCGACACCGAACGTGCGACAA
2440_chr15:23550001-23600000_Seq_1468_36007-36036	GCGTCGTTATGGTGCAACGTTCGTATTCGCCTTACTGTGTttggctgtgcttgaaaggcctttaaaatccTCGTATTCGCCTTACTGTGTTCGTATTCGCCTTACTGTGTCGACACCGAACGTGCGACAA
2442_chr15:23550001-23600000_Seq_1474_36127-36156	GCGTCGTTATGGTGCAACGTTCGTATTCGCCTTACTGTGTttaagaatattagcacagtcgtgaatacatTCGTATTCGCCTTACTGTGTTCGTATTCGCCTTACTGTGTCGACACCGAACGTGCGACAA
2445_chr15:23550001-23600000_Seq_1502_36697-36726	GCGTCGTTATGGTGCAACGTTCGTATTCGCCTTACTGTGTcactttctgacagtatcaggaacctcctgtTCGTATTCGCCTTACTGTGTTCGTATTCGCCTTACTGTGTCGACACCGAACGTGCGACAA
2448_chr15:23550001-23600000_Seq_1506_36777-36806	GCGTCGTTATGGTGCAACGTTCGTATTCGCCTTACTGTGTgcttcttgaaaagcctggccttataccttgTCGTATTCGCCTTACTGTGTTCGTATTCGCCTTACTGTGTCGACACCGAACGTGCGACAA
2451_chr15:23550001-23600000_Seq_1515_37055-37084	GCGTCGTTATGGTGCAACGTTCGTATTCGCCTTACTGTGTgtgtttaacaactaatagagtatactcttgTCGTATTCGCCTTACTGTGTTCGTATTCGCCTTACTGTGTCGACACCGAACGTGCGACAA
2453_chr15:23550001-23600000_Seq_1522_37265-37294	GCGTCGTTATGGTGCAACGTTCGTATTCGCCTTACTGTGTtagagagaaagcatgcaggactctaattaaTCGTATTCGCCTTACTGTGTTCGTATTCGCCTTACTGTGTCGACACCGAACGTGCGACAA
2456_chr15:23550001-23600000_Seq_1531_37457-37486	GCGTCGTTATGGTGCAACGTTCGTATTCGCCTTACTGTGTaagttaccagtgacaAGTtgtctttatgacTCGTATTCGCCTTACTGTGTTCGTATTCGCCTTACTGTGTCGACACCGAACGTGCGACAA
2459_chr15:23550001-23600000_Seq_1534_37517-37546	GCGTCGTTATGGTGCAACGTTCGTATTCGCCTTACTGTGTcactttgtttccagctgggtgttcattcttTCGTATTCGCCTTACTGTGTTCGTATTCGCCTTACTGTGTCGACACCGAACGTGCGACAA
2461_chr15:23550001-23600000_Seq_1536_37557-37586	GCGTCGTTATGGTGCAACGTTCGTATTCGCCTTACTGTGTgtttgccttctcccttcctggccaggaataTCGTATTCGCCTTACTGTGTTCGTATTCGCCTTACTGTGTCGACACCGAACGTGCGACAA
2464_chr15:23550001-23600000_Seq_1539_37617-37646	GCGTCGTTATGGTGCAACGTTCGTATTCGCCTTACTGTGTgcagtcctttaaaaccccatgccttctgttTCGTATTCGCCTTACTGTGTTCGTATTCGCCTTACTGTGTCGACACCGAACGTGCGACAA
2467_chr15:23550001-23600000_Seq_1544_37723-37752	GCGTCGTTATGGTGCAACGTTCGTATTCGCCTTACTGTGTcactattttatgtacatggattgtatgaagTCGTATTCGCCTTACTGTGTTCGTATTCGCCTTACTGTGTCGACACCGAACGTGCGACAA
2470_chr15:23550001-23600000_Seq_1548_37813-37842	GCGTCGTTATGGTGCAACGTTCGTATTCGCCTTACTGTGTgccttcagatcattaaaatattataatgccTCGTATTCGCCTTACTGTGTTCGTATTCGCCTTACTGTGTCGACACCGAACGTGCGACAA
2472_chr15:23550001-23600000_Seq_1550_37853-37882	GCGTCGTTATGGTGCAACGTTCGTATTCGCCTTACTGTGTgacccccaaagcacccaagctggaacagatTCGTATTCGCCTTACTGTGTTCGTATTCGCCTTACTGTGTCGACACCGAACGTGCGACAA
2475_chr15:23550001-23600000_Seq_1554_37933-37962	GCGTCGTTATGGTGCAACGTTCGTATTCGCCTTACTGTGTgcatagcagcttaagaacccagtgggcctgTCGTATTCGCCTTACTGTGTTCGTATTCGCCTTACTGTGTCGACACCGAACGTGCGACAA
2478_chr15:23550001-23600000_Seq_1559_38033-38062	GCGTCGTTATGGTGCAACGTTCGTATTCGCCTTACTGTGTggagCAAACAGAGGAGGGATTTTGTATctaTCGTATTCGCCTTACTGTGTTCGTATTCGCCTTACTGTGTCGACACCGAACGTGCGACAA
2481_chr15:23550001-23600000_Seq_1562_38093-38122	GCGTCGTTATGGTGCAACGTTCGTATTCGCCTTACTGTGTtacacagcagaaagcagttctagaagatggTCGTATTCGCCTTACTGTGTTCGTATTCGCCTTACTGTGTCGACACCGAACGTGCGACAA
2483_chr15:23550001-23600000_Seq_1564_38133-38162	GCGTCGTTATGGTGCAACGTTCGTATTCGCCTTACTGTGTAagagtttttctcctctaacttatgaaatgTCGTATTCGCCTTACTGTGTTCGTATTCGCCTTACTGTGTCGACACCGAACGTGCGACAA
2486_chr15:23550001-23600000_Seq_1567_38193-38222	GCGTCGTTATGGTGCAACGTTCGTATTCGCCTTACTGTGTGATCTTGGCAATTAGGGTTGCAGCCTGGTGTCGTATTCGCCTTACTGTGTTCGTATTCGCCTTACTGTGTCGACACCGAACGTGCGACAA
2489_chr15:23550001-23600000_Seq_1570_38253-38282	GCGTCGTTATGGTGCAACGTTCGTATTCGCCTTACTGTGTcagtaatctttatcagcaaggaagtggaagTCGTATTCGCCTTACTGTGTTCGTATTCGCCTTACTGTGTCGACACCGAACGTGCGACAA
2492_chr15:23550001-23600000_Seq_1573_38313-38342	GCGTCGTTATGGTGCAACGTTCGTATTCGCCTTACTGTGTCTTTGCCTACTGGTGATGatcatacttttaTCGTATTCGCCTTACTGTGTTCGTATTCGCCTTACTGTGTCGACACCGAACGTGCGACAA
2494_chr15:23550001-23600000_Seq_1575_38353-38382	GCGTCGTTATGGTGCAACGTTCGTATTCGCCTTACTGTGTgattagCTCTAACGACACCTGGAATGCAGTTCGTATTCGCCTTACTGTGTTCGTATTCGCCTTACTGTGTCGACACCGAACGTGCGACAA
2497_chr15:23550001-23600000_Seq_1578_38424-38453	GCGTCGTTATGGTGCAACGTTCGTATTCGCCTTACTGTGTgggagatagaagttaatataatggaaatgtTCGTATTCGCCTTACTGTGTTCGTATTCGCCTTACTGTGTCGACACCGAACGTGCGACAA
2500_chr15:23550001-23600000_Seq_1581_38484-38513	GCGTCGTTATGGTGCAACGTTCGTATTCGCCTTACTGTGTaacaataagaagtatgtgtgatcaccaataTCGTATTCGCCTTACTGTGTTCGTATTCGCCTTACTGTGTCGACACCGAACGTGCGACAA
2502_chr15:23550001-23600000_Seq_1583_38524-38553	GCGTCGTTATGGTGCAACGTTCGTATTCGCCTTACTGTGTgtactggacaatcagttggccttagactatTCGTATTCGCCTTACTGTGTTCGTATTCGCCTTACTGTGTCGACACCGAACGTGCGACAA
2505_chr15:23550001-23600000_Seq_1586_38584-38613	GCGTCGTTATGGTGCAACGTTCGTATTCGCCTTACTGTGTGGTAATACCAGGAAGTCTCTTCAGAATATATCGTATTCGCCTTACTGTGTTCGTATTCGCCTTACTGTGTCGACACCGAACGTGCGACAA
2508_chr15:23550001-23600000_Seq_1589_38662-38691	GCGTCGTTATGGTGCAACGTTCGTATTCGCCTTACTGTGTACGGTTGGCTGCCCCTTGAGGGGCTTCGCCTCGTATTCGCCTTACTGTGTTCGTATTCGCCTTACTGTGTCGACACCGAACGTGCGACAA
2511_chr15:23550001-23600000_Seq_1592_38722-38751	GCGTCGTTATGGTGCAACGTTCGTATTCGCCTTACTGTGTCATTGCAATTAAGTCTAAGAGGGCTCTTGGTCGTATTCGCCTTACTGTGTTCGTATTCGCCTTACTGTGTCGACACCGAACGTGCGACAA
2513_chr15:23550001-23600000_Seq_1594_38762-38791	GCGTCGTTATGGTGCAACGTTCGTATTCGCCTTACTGTGTTTTGGGACCCAATGGAATAACCATTCATACTCGTATTCGCCTTACTGTGTTCGTATTCGCCTTACTGTGTCGACACCGAACGTGCGACAA
2516_chr15:23550001-23600000_Seq_1597_38823-38852	GCGTCGTTATGGTGCAACGTTCGTATTCGCCTTACTGTGTTAGTGGTAGTTCACCCTTGTGTAGATAATGTCGTATTCGCCTTACTGTGTTCGTATTCGCCTTACTGTGTCGACACCGAACGTGCGACAA
2519_chr15:23550001-23600000_Seq_1600_38883-38912	GCGTCGTTATGGTGCAACGTTCGTATTCGCCTTACTGTGTGCTCTCCCCACCACCACCTCCCTAATAGCTTCGTATTCGCCTTACTGTGTTCGTATTCGCCTTACTGTGTCGACACCGAACGTGCGACAA
2522_chr15:23550001-23600000_Seq_1603_38943-38972	GCGTCGTTATGGTGCAACGTTCGTATTCGCCTTACTGTGTGGCTAAACTTCCCCATTCCCACAAGGGTGTTCGTATTCGCCTTACTGTGTTCGTATTCGCCTTACTGTGTCGACACCGAACGTGCGACAA
2524_chr15:23550001-23600000_Seq_1605_38983-39012	GCGTCGTTATGGTGCAACGTTCGTATTCGCCTTACTGTGTAAGATTCACCCTCCCCTTCAGGGCTCTTAATCGTATTCGCCTTACTGTGTTCGTATTCGCCTTACTGTGTCGACACCGAACGTGCGACAA
2527_chr15:23550001-23600000_Seq_1608_39046-39075	GCGTCGTTATGGTGCAACGTTCGTATTCGCCTTACTGTGTGCTTCAGTAATAAAAATAAATTTCACCTGGTCGTATTCGCCTTACTGTGTTCGTATTCGCCTTACTGTGTCGACACCGAACGTGCGACAA
2530_chr15:23550001-23600000_Seq_1611_39106-39135	GCGTCGTTATGGTGCAACGTTCGTATTCGCCTTACTGTGTCCAGCACCTACCTCAGCCAACAAGGGATACTCGTATTCGCCTTACTGTGTTCGTATTCGCCTTACTGTGTCGACACCGAACGTGCGACAA
2533_chr15:23550001-23600000_Seq_1614_39166-39195	GCGTCGTTATGGTGCAACGTTCGTATTCGCCTTACTGTGTTGCGATTCCCTGTCTATGGGTTGCATGGATTCGTATTCGCCTTACTGTGTTCGTATTCGCCTTACTGTGTCGACACCGAACGTGCGACAA
2535_chr15:23550001-23600000_Seq_1616_39206-39235	GCGTCGTTATGGTGCAACGTTCGTATTCGCCTTACTGTGTGGTGCCATGAAAATCTAAAGTCCAACCCACTCGTATTCGCCTTACTGTGTTCGTATTCGCCTTACTGTGTCGACACCGAACGTGCGACAA
2538_chr15:23550001-23600000_Seq_1619_39266-39295	GCGTCGTTATGGTGCAACGTTCGTATTCGCCTTACTGTGTCCAGACTTGAGGAACATTGCACACTGTGTGTCGTATTCGCCTTACTGTGTTCGTATTCGCCTTACTGTGTCGACACCGAACGTGCGACAA
2541_chr15:23550001-23600000_Seq_1622_39326-39355	GCGTCGTTATGGTGCAACGTTCGTATTCGCCTTACTGTGTCTACCACATTATAGCCAGCCAGAACAATCTTCGTATTCGCCTTACTGTGTTCGTATTCGCCTTACTGTGTCGACACCGAACGTGCGACAA
2543_chr15:23550001-23600000_Seq_1624_39366-39395	GCGTCGTTATGGTGCAACGTTCGTATTCGCCTTACTGTGTCAGCCAAAGAACTCTGGGGCACAAAGGCAATCGTATTCGCCTTACTGTGTTCGTATTCGCCTTACTGTGTCGACACCGAACGTGCGACAA
2546_chr15:23550001-23600000_Seq_1627_39459-39488	GCGTCGTTATGGTGCAACGTTCGTATTCGCCTTACTGTGTCTCATCTCTGAGCCACCTCTGAGTGCTTAGTCGTATTCGCCTTACTGTGTTCGTATTCGCCTTACTGTGTCGACACCGAACGTGCGACAA
2549_chr15:23550001-23600000_Seq_1630_39519-39548	GCGTCGTTATGGTGCAACGTTCGTATTCGCCTTACTGTGTGCACTCCCTGAAAGCCCCATGGTGTTTCCTTCGTATTCGCCTTACTGTGTTCGTATTCGCCTTACTGTGTCGACACCGAACGTGCGACAA
2552_chr15:23550001-23600000_Seq_1633_39579-39608	GCGTCGTTATGGTGCAACGTTCGTATTCGCCTTACTGTGTATTGATATCCCTCTGGCATCTTGATAAAACTCGTATTCGCCTTACTGTGTTCGTATTCGCCTTACTGTGTCGACACCGAACGTGCGACAA
2554_chr15:23550001-23600000_Seq_1635_39619-39648	GCGTCGTTATGGTGCAACGTTCGTATTCGCCTTACTGTGTTTTCCTTTTGTATTGGAACATATTGACCATTCGTATTCGCCTTACTGTGTTCGTATTCGCCTTACTGTGTCGACACCGAACGTGCGACAA
2557_chr15:23550001-23600000_Seq_1638_39679-39708	GCGTCGTTATGGTGCAACGTTCGTATTCGCCTTACTGTGTTCTGATTGCATTAGGACTTGTTCTGTAGTCTCGTATTCGCCTTACTGTGTTCGTATTCGCCTTACTGTGTCGACACCGAACGTGCGACAA
2560_chr15:23550001-23600000_Seq_1641_39739-39768	GCGTCGTTATGGTGCAACGTTCGTATTCGCCTTACTGTGTAAAACTTACACGTCTCTACCTTCCAGGAGATCGTATTCGCCTTACTGTGTTCGTATTCGCCTTACTGTGTCGACACCGAACGTGCGACAA
2563_chr15:23550001-23600000_Seq_1644_39799-39828	GCGTCGTTATGGTGCAACGTTCGTATTCGCCTTACTGTGTCCCGACCTGGACTCCCAAAAGATAAGAATATCGTATTCGCCTTACTGTGTTCGTATTCGCCTTACTGTGTCGACACCGAACGTGCGACAA
2565_chr15:23550001-23600000_Seq_1646_39839-39868	GCGTCGTTATGGTGCAACGTTCGTATTCGCCTTACTGTGTGGCTGAACCCATCTCGGATTTAAAATGGCTTCGTATTCGCCTTACTGTGTTCGTATTCGCCTTACTGTGTCGACACCGAACGTGCGACAA
2568_chr15:23550001-23600000_Seq_1649_39899-39928	GCGTCGTTATGGTGCAACGTTCGTATTCGCCTTACTGTGTACATGAGTGAAACAGGTGGATGCACCAGTGTCGTATTCGCCTTACTGTGTTCGTATTCGCCTTACTGTGTCGACACCGAACGTGCGACAA
2571_chr15:23550001-23600000_Seq_1652_39959-39988	GCGTCGTTATGGTGCAACGTTCGTATTCGCCTTACTGTGTGTGACTGTGACCACACATTCTGCCTTAAAATCGTATTCGCCTTACTGTGTTCGTATTCGCCTTACTGTGTCGACACCGAACGTGCGACAA
2574_chr15:23550001-23600000_Seq_1655_40019-40048	GCGTCGTTATGGTGCAACGTTCGTATTCGCCTTACTGTGTACCTGGAAGGTCCAAAGCCCAGAGAGGCAATCGTATTCGCCTTACTGTGTTCGTATTCGCCTTACTGTGTCGACACCGAACGTGCGACAA
2576_chr15:23550001-23600000_Seq_1657_40059-40088	GCGTCGTTATGGTGCAACGTTCGTATTCGCCTTACTGTGTTCTGCATCCTTATGTCCATGGAGATTGGGCTCGTATTCGCCTTACTGTGTTCGTATTCGCCTTACTGTGTCGACACCGAACGTGCGACAA
2579_chr15:23550001-23600000_Seq_1660_40119-40148	GCGTCGTTATGGTGCAACGTTCGTATTCGCCTTACTGTGTGATGGCCTATGTTTTTGAAGCTTACAGAAATCGTATTCGCCTTACTGTGTTCGTATTCGCCTTACTGTGTCGACACCGAACGTGCGACAA
2582_chr15:23550001-23600000_Seq_1663_40179-40208	GCGTCGTTATGGTGCAACGTTCGTATTCGCCTTACTGTGTAGGGAAGGGGCTGAGTCCACAGGAACAGGATCGTATTCGCCTTACTGTGTTCGTATTCGCCTTACTGTGTCGACACCGAACGTGCGACAA
2585_chr15:23550001-23600000_Seq_1666_40239-40268	GCGTCGTTATGGTGCAACGTTCGTATTCGCCTTACTGTGTaacttagaaactgagtacatttgaactgatTCGTATTCGCCTTACTGTGTTCGTATTCGCCTTACTGTGTCGACACCGAACGTGCGACAA
2587_chr15:23550001-23600000_Seq_1668_40279-40308	GCGTCGTTATGGTGCAACGTTCGTATTCGCCTTACTGTGTctcatggctcttcgtagaatgaggactgccTCGTATTCGCCTTACTGTGTTCGTATTCGCCTTACTGTGTCGACACCGAACGTGCGACAA
2590_chr15:23550001-23600000_Seq_1671_40339-40368	GCGTCGTTATGGTGCAACGTTCGTATTCGCCTTACTGTGTgaaagcttaaagagaaccctggctaaactgTCGTATTCGCCTTACTGTGTTCGTATTCGCCTTACTGTGTCGACACCGAACGTGCGACAA
2593_chr15:23550001-23600000_Seq_1675_40419-40448	GCGTCGTTATGGTGCAACGTTCGTATTCGCCTTACTGTGTTAGCccaaggcctaggaatcatctggaaacTCGTATTCGCCTTACTGTGTTCGTATTCGCCTTACTGTGTCGACACCGAACGTGCGACAA
2595_chr15:23550001-23600000_Seq_1677_40459-40488	GCGTCGTTATGGTGCAACGTTCGTATTCGCCTTACTGTGTTTATTTGGAGAAGATCTGCAGTGGTATCTGTCGTATTCGCCTTACTGTGTTCGTATTCGCCTTACTGTGTCGACACCGAACGTGCGACAA
2598_chr15:23550001-23600000_Seq_1680_40519-40548	GCGTCGTTATGGTGCAACGTTCGTATTCGCCTTACTGTGTTACTCCAAATTCCCATCTGCACTGGCAAACTCGTATTCGCCTTACTGTGTTCGTATTCGCCTTACTGTGTCGACACCGAACGTGCGACAA
2601_chr15:23550001-23600000_Seq_1683_40579-40608	GCGTCGTTATGGTGCAACGTTCGTATTCGCCTTACTGTGTCAACACCCTTAAGGACGACTTATCCCCTCCTCGTATTCGCCTTACTGTGTTCGTATTCGCCTTACTGTGTCGACACCGAACGTGCGACAA
2604_chr15:23550001-23600000_Seq_1686_40679-40708	GCGTCGTTATGGTGCAACGTTCGTATTCGCCTTACTGTGTaccctgcctactcacctctCTTCCCTTGCTTCGTATTCGCCTTACTGTGTTCGTATTCGCCTTACTGTGTCGACACCGAACGTGCGACAA
2606_chr15:23550001-23600000_Seq_1688_40719-40748	GCGTCGTTATGGTGCAACGTTCGTATTCGCCTTACTGTGTcatgtctgccttcctgccgctgcccatggcTCGTATTCGCCTTACTGTGTTCGTATTCGCCTTACTGTGTCGACACCGAACGTGCGACAA
2609_chr15:23550001-23600000_Seq_1691_40787-40816	GCGTCGTTATGGTGCAACGTTCGTATTCGCCTTACTGTGTTTtctgtctctgctgctgcagcctctgcctTCGTATTCGCCTTACTGTGTTCGTATTCGCCTTACTGTGTCGACACCGAACGTGCGACAA
2612_chr15:23550001-23600000_Seq_1694_40847-40876	GCGTCGTTATGGTGCAACGTTCGTATTCGCCTTACTGTGTGGCATGCCTGAGCTCAATGGTGTTAGTCCTTCGTATTCGCCTTACTGTGTTCGTATTCGCCTTACTGTGTCGACACCGAACGTGCGACAA
2615_chr15:23550001-23600000_Seq_1697_40907-40936	GCGTCGTTATGGTGCAACGTTCGTATTCGCCTTACTGTGTGAAACAGATGGACCAGACTGGGAGACTGGGTCGTATTCGCCTTACTGTGTTCGTATTCGCCTTACTGTGTCGACACCGAACGTGCGACAA
2617_chr15:23550001-23600000_Seq_1699_40947-40976	GCGTCGTTATGGTGCAACGTTCGTATTCGCCTTACTGTGTATACCCATGGTTTAATTGAGGCATCTAGGGTCGTATTCGCCTTACTGTGTTCGTATTCGCCTTACTGTGTCGACACCGAACGTGCGACAA
2620_chr15:23550001-23600000_Seq_1702_41007-41036	GCGTCGTTATGGTGCAACGTTCGTATTCGCCTTACTGTGTGGGGCATTGGAAGATATCTCCATTGTGAGGTCGTATTCGCCTTACTGTGTTCGTATTCGCCTTACTGTGTCGACACCGAACGTGCGACAA
2623_chr15:23550001-23600000_Seq_1705_41067-41096	GCGTCGTTATGGTGCAACGTTCGTATTCGCCTTACTGTGTGGTAACATGGGCATTTATCAAATTGGGAAATCGTATTCGCCTTACTGTGTTCGTATTCGCCTTACTGTGTCGACACCGAACGTGCGACAA
2626_chr15:23550001-23600000_Seq_1708_41127-41156	GCGTCGTTATGGTGCAACGTTCGTATTCGCCTTACTGTGTCCCTGTCAGTCCTCTCCTCATCAGGCCAGTTCGTATTCGCCTTACTGTGTTCGTATTCGCCTTACTGTGTCGACACCGAACGTGCGACAA
2628_chr15:23550001-23600000_Seq_1710_41167-41196	GCGTCGTTATGGTGCAACGTTCGTATTCGCCTTACTGTGTTTGAGCCCATGACCATGCTACTCTGTATCGTCGTATTCGCCTTACTGTGTTCGTATTCGCCTTACTGTGTCGACACCGAACGTGCGACAA
2631_chr15:23550001-23600000_Seq_1713_41227-41256	GCGTCGTTATGGTGCAACGTTCGTATTCGCCTTACTGTGTAACACCCAAGTCAAATTGTCATGGCTTGGATCGTATTCGCCTTACTGTGTTCGTATTCGCCTTACTGTGTCGACACCGAACGTGCGACAA
2634_chr15:23550001-23600000_Seq_1716_41287-41316	GCGTCGTTATGGTGCAACGTTCGTATTCGCCTTACTGTGTCCTCCTAACCAGTGACTCCCAGCAGCTGGATCGTATTCGCCTTACTGTGTTCGTATTCGCCTTACTGTGTCGACACCGAACGTGCGACAA
2636_chr15:23550001-23600000_Seq_1718_41327-41356	GCGTCGTTATGGTGCAACGTTCGTATTCGCCTTACTGTGTAGGATGGCCATGGCCTCCCTCAGCTGGGGATCGTATTCGCCTTACTGTGTTCGTATTCGCCTTACTGTGTCGACACCGAACGTGCGACAA
2639_chr15:23550001-23600000_Seq_1723_41427-41456	GCGTCGTTATGGTGCAACGTTCGTATTCGCCTTACTGTGTtaaaaaccgcttgcctttgtttctaattggTCGTATTCGCCTTACTGTGTTCGTATTCGCCTTACTGTGTCGACACCGAACGTGCGACAA
2642_chr15:23550001-23600000_Seq_1726_41487-41516	GCGTCGTTATGGTGCAACGTTCGTATTCGCCTTACTGTGTattgttctggagaaggggcatattgagtgaTCGTATTCGCCTTACTGTGTTCGTATTCGCCTTACTGTGTCGACACCGAACGTGCGACAA
2645_chr15:23550001-23600000_Seq_1729_41570-41599	GCGTCGTTATGGTGCAACGTTCGTATTCGCCTTACTGTGTcctgtgggtctggactccaaccccaaatgtTCGTATTCGCCTTACTGTGTTCGTATTCGCCTTACTGTGTCGACACCGAACGTGCGACAA
2647_chr15:23550001-23600000_Seq_1738_41773-41802	GCGTCGTTATGGTGCAACGTTCGTATTCGCCTTACTGTGTctaaaagtacaaaaattagtcggggtgtggTCGTATTCGCCTTACTGTGTTCGTATTCGCCTTACTGTGTCGACACCGAACGTGCGACAA
2650_chr15:23550001-23600000_Seq_1745_41914-41943	GCGTCGTTATGGTGCAACGTTCGTATTCGCCTTACTGTGTccattgtatatttaagttgtatgggccgggTCGTATTCGCCTTACTGTGTTCGTATTCGCCTTACTGTGTCGACACCGAACGTGCGACAA
2653_chr15:23550001-23600000_Seq_1749_42024-42053	GCGTCGTTATGGTGCAACGTTCGTATTCGCCTTACTGTGTagataagaccccaaacctgtccaagctggaTCGTATTCGCCTTACTGTGTTCGTATTCGCCTTACTGTGTCGACACCGAACGTGCGACAA
2656_chr15:23550001-23600000_Seq_1753_42104-42133	GCGTCGTTATGGTGCAACGTTCGTATTCGCCTTACTGTGTgtgccttatatataggcacagctatttcaaTCGTATTCGCCTTACTGTGTTCGTATTCGCCTTACTGTGTCGACACCGAACGTGCGACAA
2658_chr15:23550001-23600000_Seq_1756_42178-42207	GCGTCGTTATGGTGCAACGTTCGTATTCGCCTTACTGTGTtccttgtcaatttgttaccagtgcaactctTCGTATTCGCCTTACTGTGTTCGTATTCGCCTTACTGTGTCGACACCGAACGTGCGACAA
2661_chr15:23550001-23600000_Seq_1764_42429-42458	GCGTCGTTATGGTGCAACGTTCGTATTCGCCTTACTGTGTaactaactttttagatattatggcctcctgTCGTATTCGCCTTACTGTGTTCGTATTCGCCTTACTGTGTCGACACCGAACGTGCGACAA
2664_chr15:23550001-23600000_Seq_1774_42933-42962	GCGTCGTTATGGTGCAACGTTCGTATTCGCCTTACTGTGTcagagcagacctgatctatttaatataaaaTCGTATTCGCCTTACTGTGTTCGTATTCGCCTTACTGTGTCGACACCGAACGTGCGACAA
2667_chr15:23550001-23600000_Seq_1779_43033-43062	GCGTCGTTATGGTGCAACGTTCGTATTCGCCTTACTGTGTaggcccagctaattttgtccaagctggtctTCGTATTCGCCTTACTGTGTTCGTATTCGCCTTACTGTGTCGACACCGAACGTGCGACAA
2669_chr15:23550001-23600000_Seq_1786_43173-43202	GCGTCGTTATGGTGCAACGTTCGTATTCGCCTTACTGTGTttgagataaggtctcattctgtctgcccagTCGTATTCGCCTTACTGTGTTCGTATTCGCCTTACTGTGTCGACACCGAACGTGCGACAA
2672_chr15:23550001-23600000_Seq_1793_43338-43367	GCGTCGTTATGGTGCAACGTTCGTATTCGCCTTACTGTGTagatgttgaaagccaattttgagagataatTCGTATTCGCCTTACTGTGTTCGTATTCGCCTTACTGTGTCGACACCGAACGTGCGACAA
2675_chr15:23550001-23600000_Seq_1796_43398-43427	GCGTCGTTATGGTGCAACGTTCGTATTCGCCTTACTGTGTaaattaatattattccgtctctctaggcccTCGTATTCGCCTTACTGTGTTCGTATTCGCCTTACTGTGTCGACACCGAACGTGCGACAA
2677_chr15:23550001-23600000_Seq_1799_43458-43487	GCGTCGTTATGGTGCAACGTTCGTATTCGCCTTACTGTGTcttcagaccagggagaaagcaacaaacaaaTCGTATTCGCCTTACTGTGTTCGTATTCGCCTTACTGTGTCGACACCGAACGTGCGACAA
2680_chr15:23550001-23600000_Seq_1805_43609-43638	GCGTCGTTATGGTGCAACGTTCGTATTCGCCTTACTGTGTctgagattaaaagaacgtttttacatccatTCGTATTCGCCTTACTGTGTTCGTATTCGCCTTACTGTGTCGACACCGAACGTGCGACAA
2683_chr15:23550001-23600000_Seq_1812_43951-43980	GCGTCGTTATGGTGCAACGTTCGTATTCGCCTTACTGTGTcacgttttataatgtctctttagtacttgaTCGTATTCGCCTTACTGTGTTCGTATTCGCCTTACTGTGTCGACACCGAACGTGCGACAA
2686_chr15:23550001-23600000_Seq_1817_44066-44095	GCGTCGTTATGGTGCAACGTTCGTATTCGCCTTACTGTGTgtggtttgttaagtaatgggtgcctttttaTCGTATTCGCCTTACTGTGTTCGTATTCGCCTTACTGTGTCGACACCGAACGTGCGACAA
2688_chr15:23550001-23600000_Seq_1819_44127-44156	GCGTCGTTATGGTGCAACGTTCGTATTCGCCTTACTGTGTtttataagaagttggtggagtagagtttttTCGTATTCGCCTTACTGTGTTCGTATTCGCCTTACTGTGTCGACACCGAACGTGCGACAA
2691_chr15:23550001-23600000_Seq_1826_44267-44296	GCGTCGTTATGGTGCAACGTTCGTATTCGCCTTACTGTGTtattatgaactttgaggaggaactaggagtTCGTATTCGCCTTACTGTGTTCGTATTCGCCTTACTGTGTCGACACCGAACGTGCGACAA
2694_chr15:23550001-23600000_Seq_1834_44495-44524	GCGTCGTTATGGTGCAACGTTCGTATTCGCCTTACTGTGTatttattgtatataagacaaggggtagggtTCGTATTCGCCTTACTGTGTTCGTATTCGCCTTACTGTGTCGACACCGAACGTGCGACAA
2697_chr15:23550001-23600000_Seq_1841_44683-44712	GCGTCGTTATGGTGCAACGTTCGTATTCGCCTTACTGTGTttgggcagcagatgtagggtctagtcctatTCGTATTCGCCTTACTGTGTTCGTATTCGCCTTACTGTGTCGACACCGAACGTGCGACAA
2699_chr15:23550001-23600000_Seq_1845_44763-44792	GCGTCGTTATGGTGCAACGTTCGTATTCGCCTTACTGTGTtttcaggttgtctaagtgggcttctcataaTCGTATTCGCCTTACTGTGTTCGTATTCGCCTTACTGTGTCGACACCGAACGTGCGACAA
2702_chr15:23550001-23600000_Seq_1849_44873-44902	GCGTCGTTATGGTGCAACGTTCGTATTCGCCTTACTGTGTatcttgagggtctagaaaagcaagcctttcTCGTATTCGCCTTACTGTGTTCGTATTCGCCTTACTGTGTCGACACCGAACGTGCGACAA
2705_chr15:23550001-23600000_Seq_1853_44972-45001	GCGTCGTTATGGTGCAACGTTCGTATTCGCCTTACTGTGTgactgagatgatcattctctccaactttttTCGTATTCGCCTTACTGTGTTCGTATTCGCCTTACTGTGTCGACACCGAACGTGCGACAA
2708_chr15:23550001-23600000_Seq_1856_45032-45061	GCGTCGTTATGGTGCAACGTTCGTATTCGCCTTACTGTGTctcagaagtgcaactgtgttgtgtcttgctTCGTATTCGCCTTACTGTGTTCGTATTCGCCTTACTGTGTCGACACCGAACGTGCGACAA
2710_chr15:23550001-23600000_Seq_1859_45113-45142	GCGTCGTTATGGTGCAACGTTCGTATTCGCCTTACTGTGTTGTATGGGAAGCAGttttgtgcaagaggttTCGTATTCGCCTTACTGTGTTCGTATTCGCCTTACTGTGTCGACACCGAACGTGCGACAA
2713_chr15:23550001-23600000_Seq_1865_45246-45275	GCGTCGTTATGGTGCAACGTTCGTATTCGCCTTACTGTGTtggatattaatatgtattagctggtgtggtTCGTATTCGCCTTACTGTGTTCGTATTCGCCTTACTGTGTCGACACCGAACGTGCGACAA
2716_chr15:23550001-23600000_Seq_1871_45418-45447	GCGTCGTTATGGTGCAACGTTCGTATTCGCCTTACTGTGTttttgcatataaaatgtgctgaagaagatgTCGTATTCGCCTTACTGTGTTCGTATTCGCCTTACTGTGTCGACACCGAACGTGCGACAA
2718_chr15:23550001-23600000_Seq_1875_45536-45565	GCGTCGTTATGGTGCAACGTTCGTATTCGCCTTACTGTGTttactgcacccagcctgagcaacagagtgaTCGTATTCGCCTTACTGTGTTCGTATTCGCCTTACTGTGTCGACACCGAACGTGCGACAA
2721_chr15:23550001-23600000_Seq_1882_45686-45715	GCGTCGTTATGGTGCAACGTTCGTATTCGCCTTACTGTGTcaacacagagggaacttgtgtctacaaaaaTCGTATTCGCCTTACTGTGTTCGTATTCGCCTTACTGTGTCGACACCGAACGTGCGACAA
2724_chr15:23550001-23600000_Seq_1885_45746-45775	GCGTCGTTATGGTGCAACGTTCGTATTCGCCTTACTGTGTagcaatttgggagatcaaggcagaaggattTCGTATTCGCCTTACTGTGTTCGTATTCGCCTTACTGTGTCGACACCGAACGTGCGACAA
2727_chr15:23550001-23600000_Seq_1889_45826-45855	GCGTCGTTATGGTGCAACGTTCGTATTCGCCTTACTGTGTtagatgcttgttgaatgtctgtgttattttTCGTATTCGCCTTACTGTGTTCGTATTCGCCTTACTGTGTCGACACCGAACGTGCGACAA
2729_chr15:23550001-23600000_Seq_1892_45915-45944	GCGTCGTTATGGTGCAACGTTCGTATTCGCCTTACTGTGTtaaatgctgtaggtgatctccttgtgtaagTCGTATTCGCCTTACTGTGTTCGTATTCGCCTTACTGTGTCGACACCGAACGTGCGACAA
2732_chr15:23550001-23600000_Seq_1902_46213-46242	GCGTCGTTATGGTGCAACGTTCGTATTCGCCTTACTGTGTgggtcagggtatggcacaaaaaggtgtaagTCGTATTCGCCTTACTGTGTTCGTATTCGCCTTACTGTGTCGACACCGAACGTGCGACAA
2735_chr15:23550001-23600000_Seq_1908_46388-46417	GCGTCGTTATGGTGCAACGTTCGTATTCGCCTTACTGTGTagtgctcataaattcagtcagtccaagtatTCGTATTCGCCTTACTGTGTTCGTATTCGCCTTACTGTGTCGACACCGAACGTGCGACAA
2738_chr15:23550001-23600000_Seq_1916_46570-46599	GCGTCGTTATGGTGCAACGTTCGTATTCGCCTTACTGTGTcaaaatgaatatgtatgtaaactggtgagtTCGTATTCGCCTTACTGTGTTCGTATTCGCCTTACTGTGTCGACACCGAACGTGCGACAA
2740_chr15:23550001-23600000_Seq_1923_46710-46739	GCGTCGTTATGGTGCAACGTTCGTATTCGCCTTACTGTGTtgtccctatgctgagttctttttctttttcTCGTATTCGCCTTACTGTGTTCGTATTCGCCTTACTGTGTCGACACCGAACGTGCGACAA
2743_chr15:23550001-23600000_Seq_1926_46770-46799	GCGTCGTTATGGTGCAACGTTCGTATTCGCCTTACTGTGTttcccctgtggggacctgggattcaatctaTCGTATTCGCCTTACTGTGTTCGTATTCGCCTTACTGTGTCGACACCGAACGTGCGACAA
2746_chr15:23550001-23600000_Seq_1937_46995-47024	GCGTCGTTATGGTGCAACGTTCGTATTCGCCTTACTGTGTtccatgtgaataatagagacaggaggtggcTCGTATTCGCCTTACTGTGTTCGTATTCGCCTTACTGTGTCGACACCGAACGTGCGACAA
2749_chr15:23550001-23600000_Seq_1943_47115-47144	GCGTCGTTATGGTGCAACGTTCGTATTCGCCTTACTGTGTgtttgtctccagtgttctctggggtctaggTCGTATTCGCCTTACTGTGTTCGTATTCGCCTTACTGTGTCGACACCGAACGTGCGACAA
2751_chr15:23550001-23600000_Seq_1945_47155-47184	GCGTCGTTATGGTGCAACGTTCGTATTCGCCTTACTGTGTgagttagacctgcttagtatgtgatgctctTCGTATTCGCCTTACTGTGTTCGTATTCGCCTTACTGTGTCGACACCGAACGTGCGACAA
2754_chr15:23550001-23600000_Seq_1948_47215-47244	GCGTCGTTATGGTGCAACGTTCGTATTCGCCTTACTGTGTtgaataggaaagcaggatagagtctcatgtTCGTATTCGCCTTACTGTGTTCGTATTCGCCTTACTGTGTCGACACCGAACGTGCGACAA
2757_chr15:23550001-23600000_Seq_1951_47275-47304	GCGTCGTTATGGTGCAACGTTCGTATTCGCCTTACTGTGTgcgctatcttgtctgatctcagaaAGTCTTTCGTATTCGCCTTACTGTGTTCGTATTCGCCTTACTGTGTCGACACCGAACGTGCGACAA
2759_chr15:23550001-23600000_Seq_1953_47315-47344	GCGTCGTTATGGTGCAACGTTCGTATTCGCCTTACTGTGTTGTGGGCTGATGGctaaggccatacgggaaTCGTATTCGCCTTACTGTGTTCGTATTCGCCTTACTGTGTCGACACCGAACGTGCGACAA
2762_chr15:23550001-23600000_Seq_1956_47375-47404	GCGTCGTTATGGTGCAACGTTCGTATTCGCCTTACTGTGTGTTCAATCCCAGGATGCAGCCCCCTCTAGTTCGTATTCGCCTTACTGTGTTCGTATTCGCCTTACTGTGTCGACACCGAACGTGCGACAA
2765_chr15:23550001-23600000_Seq_1959_47435-47464	GCGTCGTTATGGTGCAACGTTCGTATTCGCCTTACTGTGTgttcaagcgaATGGTATTTTCTTGATTGTGTCGTATTCGCCTTACTGTGTTCGTATTCGCCTTACTGTGTCGACACCGAACGTGCGACAA
2768_chr15:23550001-23600000_Seq_1978_47926-47955	GCGTCGTTATGGTGCAACGTTCGTATTCGCCTTACTGTGTgtttggacactttggaggcttgttcattgcTCGTATTCGCCTTACTGTGTTCGTATTCGCCTTACTGTGTCGACACCGAACGTGCGACAA
2770_chr15:23550001-23600000_Seq_1982_48012-48041	GCGTCGTTATGGTGCAACGTTCGTATTCGCCTTACTGTGTgcttctctcaatttggaaaattgcaaaataTCGTATTCGCCTTACTGTGTTCGTATTCGCCTTACTGTGTCGACACCGAACGTGCGACAA
2773_chr15:23550001-23600000_Seq_1986_48092-48121	GCGTCGTTATGGTGCAACGTTCGTATTCGCCTTACTGTGTttggacactcttgggggcttgttagtaactTCGTATTCGCCTTACTGTGTTCGTATTCGCCTTACTGTGTCGACACCGAACGTGCGACAA
2776_chr15:23550001-23600000_Seq_1992_48212-48241	GCGTCGTTATGGTGCAACGTTCGTATTCGCCTTACTGTGTagtgtcttttgtgggcccagacggtggggtTCGTATTCGCCTTACTGTGTTCGTATTCGCCTTACTGTGTCGACACCGAACGTGCGACAA
2779_chr15:23550001-23600000_Seq_1998_48332-48361	GCGTCGTTATGGTGCAACGTTCGTATTCGCCTTACTGTGTttatggctggaggtgagttttagtctctctTCGTATTCGCCTTACTGTGTTCGTATTCGCCTTACTGTGTCGACACCGAACGTGCGACAA
2781_chr15:23550001-23600000_Seq_2001_48400-48429	GCGTCGTTATGGTGCAACGTTCGTATTCGCCTTACTGTGTtgctcatggctcagctgctgccaagggctgTCGTATTCGCCTTACTGTGTTCGTATTCGCCTTACTGTGTCGACACCGAACGTGCGACAA
2784_chr15:23550001-23600000_Seq_2004_48460-48489	GCGTCGTTATGGTGCAACGTTCGTATTCGCCTTACTGTGTaccaaacccctagcattttggtaacagattTCGTATTCGCCTTACTGTGTTCGTATTCGCCTTACTGTGTCGACACCGAACGTGCGACAA
2787_chr15:23550001-23600000_Seq_2009_48560-48589	GCGTCGTTATGGTGCAACGTTCGTATTCGCCTTACTGTGTatctctagctctccttggctgtaccatctgTCGTATTCGCCTTACTGTGTTCGTATTCGCCTTACTGTGTCGACACCGAACGTGCGACAA
2790_chr15:23550001-23600000_Seq_2013_48640-48669	GCGTCGTTATGGTGCAACGTTCGTATTCGCCTTACTGTGTcctctctaattcctgtttttccaccttcctTCGTATTCGCCTTACTGTGTTCGTATTCGCCTTACTGTGTCGACACCGAACGTGCGACAA
2792_chr15:23550001-23600000_Seq_2021_48800-48829	GCGTCGTTATGGTGCAACGTTCGTATTCGCCTTACTGTGTtattgaaactgtccctccctcgtcttcaaaTCGTATTCGCCTTACTGTGTTCGTATTCGCCTTACTGTGTCGACACCGAACGTGCGACAA
2795_chr15:23550001-23600000_Seq_2025_48902-48931	GCGTCGTTATGGTGCAACGTTCGTATTCGCCTTACTGTGTgtgtgagccaatttattgtaagaaatcattTCGTATTCGCCTTACTGTGTTCGTATTCGCCTTACTGTGTCGACACCGAACGTGCGACAA
2798_chr15:23550001-23600000_Seq_2028_48962-48991	GCGTCGTTATGGTGCAACGTTCGTATTCGCCTTACTGTGTgctttcctggatttccagcttgcagaaggaTCGTATTCGCCTTACTGTGTTCGTATTCGCCTTACTGTGTCGACACCGAACGTGCGACAA
2800_chr15:23550001-23600000_Seq_2031_49022-49051	GCGTCGTTATGGTGCAACGTTCGTATTCGCCTTACTGTGTatttacaccactggctctcccagcttcaggTCGTATTCGCCTTACTGTGTTCGTATTCGCCTTACTGTGTCGACACCGAACGTGCGACAA
2803_chr15:23550001-23600000_Seq_2034_49082-49111	GCGTCGTTATGGTGCAACGTTCGTATTCGCCTTACTGTGTagactttgccctgttcatttttgagcctggTCGTATTCGCCTTACTGTGTTCGTATTCGCCTTACTGTGTCGACACCGAACGTGCGACAA
2806_chr15:23550001-23600000_Seq_2037_49142-49171	GCGTCGTTATGGTGCAACGTTCGTATTCGCCTTACTGTGTtgtggctgggtcttatccagactgctggagTCGTATTCGCCTTACTGTGTTCGTATTCGCCTTACTGTGTCGACACCGAACGTGCGACAA
2809_chr15:23550001-23600000_Seq_2040_49202-49231	GCGTCGTTATGGTGCAACGTTCGTATTCGCCTTACTGTGTgtttctggatgaaattaacattttgtctgtTCGTATTCGCCTTACTGTGTTCGTATTCGCCTTACTGTGTCGACACCGAACGTGCGACAA
2811_chr15:23550001-23600000_Seq_2042_49242-49271	GCGTCGTTATGGTGCAACGTTCGTATTCGCCTTACTGTGTcatggagtgcccagctatttggttaaatatTCGTATTCGCCTTACTGTGTTCGTATTCGCCTTACTGTGTCGACACCGAACGTGCGACAA
2814_chr15:23550001-23600000_Seq_2045_49302-49331	GCGTCGTTATGGTGCAACGTTCGTATTCGCCTTACTGTGTtatgagtggcaagttggcaagaggtggatgTCGTATTCGCCTTACTGTGTTCGTATTCGCCTTACTGTGTCGACACCGAACGTGCGACAA
2817_chr15:23550001-23600000_Seq_2049_49387-49416	GCGTCGTTATGGTGCAACGTTCGTATTCGCCTTACTGTGTattcagtgtagttgcatcatatttgctggaTCGTATTCGCCTTACTGTGTTCGTATTCGCCTTACTGTGTCGACACCGAACGTGCGACAA
2820_chr15:23550001-23600000_Seq_2052_49447-49476	GCGTCGTTATGGTGCAACGTTCGTATTCGCCTTACTGTGTaaacatcactcaaggattatatctcaacttTCGTATTCGCCTTACTGTGTTCGTATTCGCCTTACTGTGTCGACACCGAACGTGCGACAA
2822_chr15:23550001-23600000_Seq_2054_49487-49516	GCGTCGTTATGGTGCAACGTTCGTATTCGCCTTACTGTGTacatccagcatttaagttacagaatgtcatTCGTATTCGCCTTACTGTGTTCGTATTCGCCTTACTGTGTCGACACCGAACGTGCGACAA
2825_chr15:23550001-23600000_Seq_2058_49576-49605	GCGTCGTTATGGTGCAACGTTCGTATTCGCCTTACTGTGTCAAGCTATGACACTCAAtttcttaacccctTCGTATTCGCCTTACTGTGTTCGTATTCGCCTTACTGTGTCGACACCGAACGTGCGACAA
2828_chr15:23550001-23600000_Seq_2061_49636-49665	GCGTCGTTATGGTGCAACGTTCGTATTCGCCTTACTGTGTGCTCAAGGGCGACAAGTCAGAGACAGGACATCGTATTCGCCTTACTGTGTTCGTATTCGCCTTACTGTGTCGACACCGAACGTGCGACAA
2831_chr15:23550001-23600000_Seq_2064_49713-49742	GCGTCGTTATGGTGCAACGTTCGTATTCGCCTTACTGTGTAACAGTTTATGTTATGGAGCCTTATGTATCTCGTATTCGCCTTACTGTGTTCGTATTCGCCTTACTGTGTCGACACCGAACGTGCGACAA
2833_chr15:23550001-23600000_Seq_2066_49753-49782	GCGTCGTTATGGTGCAACGTTCGTATTCGCCTTACTGTGTTATCAGGGTCACCAGGCTTAAAGCAGAAGTTCGTATTCGCCTTACTGTGTTCGTATTCGCCTTACTGTGTCGACACCGAACGTGCGACAA
2836_chr15:23550001-23600000_Seq_2069_49813-49842	GCGTCGTTATGGTGCAACGTTCGTATTCGCCTTACTGTGTgggttgattgattaatttgaagGGAATGGATCGTATTCGCCTTACTGTGTTCGTATTCGCCTTACTGTGTCGACACCGAACGTGCGACAA
2839_chr15:23550001-23600000_Seq_2073_49893-49922	GCGTCGTTATGGTGCAACGTTCGTATTCGCCTTACTGTGTcaagagagataaagaggaatctgtaagctgTCGTATTCGCCTTACTGTGTTCGTATTCGCCTTACTGTGTCGACACCGAACGTGCGACAA
2841_chr15:23550001-23600000_Seq_2076_49953-49982	GCGTCGTTATGGTGCAACGTTCGTATTCGCCTTACTGTGTagggccagtgggaaaagcggggctgtcttgTCGTATTCGCCTTACTGTGTTCGTATTCGCCTTACTGTGTCGACACCGAACGTGCGACAA
2844_chr15:23600001-23650000_Seq_4_63-92	GCGTCGTTATGGTGCAACGTTAGCGCCTGAATTAGCTATATTAagttagatttggtacagtcacgtgtggTAGCGCCTGAATTAGCTATATAGCGCCTGAATTAGCTATACGACACCGAACGTGCGACAA
2847_chr15:23600001-23650000_Seq_7_135-164	GCGTCGTTATGGTGCAACGTTAGCGCCTGAATTAGCTATAAGAGCAGTCAAAAGGACTTCGAGGGTGTCCTAGCGCCTGAATTAGCTATATAGCGCCTGAATTAGCTATACGACACCGAACGTGCGACAA
2850_chr15:23600001-23650000_Seq_10_195-224	GCGTCGTTATGGTGCAACGTTAGCGCCTGAATTAGCTATAGCAAGTGATTGAGCCTTCCTAGATGGTCATTAGCGCCTGAATTAGCTATATAGCGCCTGAATTAGCTATACGACACCGAACGTGCGACAA
2853_chr15:23600001-23650000_Seq_13_255-284	GCGTCGTTATGGTGCAACGTTAGCGCCTGAATTAGCTATATCTTGCTAGCACTCTACGTAAGCAGCACCCTAGCGCCTGAATTAGCTATATAGCGCCTGAATTAGCTATACGACACCGAACGTGCGACAA
2856_chr15:23600001-23650000_Seq_16_318-347	GCGTCGTTATGGTGCAACGTTAGCGCCTGAATTAGCTATATTTTTCTGGGTCATAGCTGGCCAAATATACTAGCGCCTGAATTAGCTATATAGCGCCTGAATTAGCTATACGACACCGAACGTGCGACAA
2859_chr15:23600001-23650000_Seq_19_378-407	GCGTCGTTATGGTGCAACGTTAGCGCCTGAATTAGCTATATCTGCAACCAATGTGACTCAGAACCATTTATAGCGCCTGAATTAGCTATATAGCGCCTGAATTAGCTATACGACACCGAACGTGCGACAA
2862_chr15:23600001-23650000_Seq_22_438-467	GCGTCGTTATGGTGCAACGTTAGCGCCTGAATTAGCTATAGGAGCTGTACACCACCTGTCCCCTAAAATATAGCGCCTGAATTAGCTATATAGCGCCTGAATTAGCTATACGACACCGAACGTGCGACAA
2865_chr15:23600001-23650000_Seq_25_498-527	GCGTCGTTATGGTGCAACGTTAGCGCCTGAATTAGCTATAcCATCTCCATATATTTCCAAACACTAACTCTAGCGCCTGAATTAGCTATATAGCGCCTGAATTAGCTATACGACACCGAACGTGCGACAA
2868_chr15:23600001-23650000_Seq_28_558-587	GCGTCGTTATGGTGCAACGTTAGCGCCTGAATTAGCTATAatccacctgtcccggcctcccaatgtgctgTAGCGCCTGAATTAGCTATATAGCGCCTGAATTAGCTATACGACACCGAACGTGCGACAA
2871_chr15:23600001-23650000_Seq_41_856-885	GCGTCGTTATGGTGCAACGTTAGCGCCTGAATTAGCTATAATACCATCCACAGATACAGCAGAATGGGGGTAGCGCCTGAATTAGCTATATAGCGCCTGAATTAGCTATACGACACCGAACGTGCGACAA
2874_chr15:23600001-23650000_Seq_44_916-945	GCGTCGTTATGGTGCAACGTTAGCGCCTGAATTAGCTATAGACTCCCTAGTTAGTGGGGACACCCCTCTTTAGCGCCTGAATTAGCTATATAGCGCCTGAATTAGCTATACGACACCGAACGTGCGACAA
2877_chr15:23600001-23650000_Seq_47_976-1005	GCGTCGTTATGGTGCAACGTTAGCGCCTGAATTAGCTATAAGAAAAGGCAGCAGCAATGGGATGGCAGATTAGCGCCTGAATTAGCTATATAGCGCCTGAATTAGCTATACGACACCGAACGTGCGACAA
2880_chr15:23600001-23650000_Seq_50_1036-1065	GCGTCGTTATGGTGCAACGTTAGCGCCTGAATTAGCTATAAGCATCAGGAGTTAGACCCTCAGTAACCCATAGCGCCTGAATTAGCTATATAGCGCCTGAATTAGCTATACGACACCGAACGTGCGACAA
2883_chr15:23600001-23650000_Seq_53_1096-1125	GCGTCGTTATGGTGCAACGTTAGCGCCTGAATTAGCTATAAAGGGATAGGAATGAGATATTCCAGCCCTTTAGCGCCTGAATTAGCTATATAGCGCCTGAATTAGCTATACGACACCGAACGTGCGACAA
2886_chr15:23600001-23650000_Seq_69_1476-1505	GCGTCGTTATGGTGCAACGTTAGCGCCTGAATTAGCTATAGCATTGGATGGGCATTTTTAAATTTCttttTAGCGCCTGAATTAGCTATATAGCGCCTGAATTAGCTATACGACACCGAACGTGCGACAA
2889_chr15:23600001-23650000_Seq_72_1536-1565	GCGTCGTTATGGTGCAACGTTAGCGCCTGAATTAGCTATATGAGCCTGAGACCAAGGCTTTAGCATGTTGTAGCGCCTGAATTAGCTATATAGCGCCTGAATTAGCTATACGACACCGAACGTGCGACAA
2892_chr15:23600001-23650000_Seq_75_1596-1625	GCGTCGTTATGGTGCAACGTTAGCGCCTGAATTAGCTATATGGATTTGTTCCCACTAGTGCAACAGTGGCTAGCGCCTGAATTAGCTATATAGCGCCTGAATTAGCTATACGACACCGAACGTGCGACAA
2895_chr15:23600001-23650000_Seq_78_1656-1685	GCGTCGTTATGGTGCAACGTTAGCGCCTGAATTAGCTATAGTTCTATTTGTAGGTAGCTACCTGCCTCTCTAGCGCCTGAATTAGCTATATAGCGCCTGAATTAGCTATACGACACCGAACGTGCGACAA
2897_chr15:23600001-23650000_Seq_80_1698-1727	GCGTCGTTATGGTGCAACGTTAGCGCCTGAATTAGCTATAGACCTTGCCAGTGACCTCTGGGAAGGTTTTTAGCGCCTGAATTAGCTATATAGCGCCTGAATTAGCTATACGACACCGAACGTGCGACAA
2900_chr15:23600001-23650000_Seq_83_1758-1787	GCGTCGTTATGGTGCAACGTTAGCGCCTGAATTAGCTATAGTCTAATTAGATAAAATTTCTGGTCTTGTCTAGCGCCTGAATTAGCTATATAGCGCCTGAATTAGCTATACGACACCGAACGTGCGACAA
2903_chr15:23600001-23650000_Seq_86_1846-1875	GCGTCGTTATGGTGCAACGTTAGCGCCTGAATTAGCTATAgccagtaacaTATTTGGTGCTGTGAGAGTTTAGCGCCTGAATTAGCTATATAGCGCCTGAATTAGCTATACGACACCGAACGTGCGACAA
2906_chr15:23600001-23650000_Seq_96_2046-2075	GCGTCGTTATGGTGCAACGTTAGCGCCTGAATTAGCTATAcctgggtttcttccaaggatactttcctttTAGCGCCTGAATTAGCTATATAGCGCCTGAATTAGCTATACGACACCGAACGTGCGACAA
2909_chr15:23600001-23650000_Seq_104_2209-2238	GCGTCGTTATGGTGCAACGTTAGCGCCTGAATTAGCTATAttcatacaacttcctaaacacactatgcgtTAGCGCCTGAATTAGCTATATAGCGCCTGAATTAGCTATACGACACCGAACGTGCGACAA
2912_chr15:23600001-23650000_Seq_108_2289-2318	GCGTCGTTATGGTGCAACGTTAGCGCCTGAATTAGCTATAgcgcactaagagataaaatggcaggagtatTAGCGCCTGAATTAGCTATATAGCGCCTGAATTAGCTATACGACACCGAACGTGCGACAA
2915_chr15:23600001-23650000_Seq_115_2429-2458	GCGTCGTTATGGTGCAACGTTAGCGCCTGAATTAGCTATAtggcagcaggcaccagggcaaggtcatatcTAGCGCCTGAATTAGCTATATAGCGCCTGAATTAGCTATACGACACCGAACGTGCGACAA
2918_chr15:23600001-23650000_Seq_121_2549-2578	GCGTCGTTATGGTGCAACGTTAGCGCCTGAATTAGCTATAcGTTCTtgttacagtaggcagacgggcatgTAGCGCCTGAATTAGCTATATAGCGCCTGAATTAGCTATACGACACCGAACGTGCGACAA
2921_chr15:23600001-23650000_Seq_124_2609-2638	GCGTCGTTATGGTGCAACGTTAGCGCCTGAATTAGCTATAgttgaacacattcagaatggatgctgaggcTAGCGCCTGAATTAGCTATATAGCGCCTGAATTAGCTATACGACACCGAACGTGCGACAA
2924_chr15:23600001-23650000_Seq_128_2689-2718	GCGTCGTTATGGTGCAACGTTAGCGCCTGAATTAGCTATAactgaactgaggaatggggaagacgcagggTAGCGCCTGAATTAGCTATATAGCGCCTGAATTAGCTATACGACACCGAACGTGCGACAA
2927_chr15:23600001-23650000_Seq_132_2769-2798	GCGTCGTTATGGTGCAACGTTAGCGCCTGAATTAGCTATAgtggaggtcagtgggaccaatcaagtaggtTAGCGCCTGAATTAGCTATATAGCGCCTGAATTAGCTATACGACACCGAACGTGCGACAA
2930_chr15:23600001-23650000_Seq_135_2829-2858	GCGTCGTTATGGTGCAACGTTAGCGCCTGAATTAGCTATAgaagtcacgccatgactgagaggtagtcgcTAGCGCCTGAATTAGCTATATAGCGCCTGAATTAGCTATACGACACCGAACGTGCGACAA
2933_chr15:23600001-23650000_Seq_138_2889-2918	GCGTCGTTATGGTGCAACGTTAGCGCCTGAATTAGCTATAgcaggcttcctgtgggaagttttaactggtTAGCGCCTGAATTAGCTATATAGCGCCTGAATTAGCTATACGACACCGAACGTGCGACAA
2936_chr15:23600001-23650000_Seq_141_2949-2978	GCGTCGTTATGGTGCAACGTTAGCGCCTGAATTAGCTATAagggaatgagcaaagggcctgaaaaccaaaTAGCGCCTGAATTAGCTATATAGCGCCTGAATTAGCTATACGACACCGAACGTGCGACAA
2939_chr15:23600001-23650000_Seq_144_3009-3038	GCGTCGTTATGGTGCAACGTTAGCGCCTGAATTAGCTATActgagtgccgatgggaagggtgggggcatcTAGCGCCTGAATTAGCTATATAGCGCCTGAATTAGCTATACGACACCGAACGTGCGACAA
2942_chr15:23600001-23650000_Seq_151_3149-3178	GCGTCGTTATGGTGCAACGTTAGCGCCTGAATTAGCTATAggagatccctgaccagaaggagagtcaggtTAGCGCCTGAATTAGCTATATAGCGCCTGAATTAGCTATACGACACCGAACGTGCGACAA
2945_chr15:23600001-23650000_Seq_156_3249-3278	GCGTCGTTATGGTGCAACGTTAGCGCCTGAATTAGCTATAgaccagctgtccctctcacctgaaccttgtTAGCGCCTGAATTAGCTATATAGCGCCTGAATTAGCTATACGACACCGAACGTGCGACAA
2948_chr15:23600001-23650000_Seq_159_3309-3338	GCGTCGTTATGGTGCAACGTTAGCGCCTGAATTAGCTATAtcctttatggaatacctctttatgttggtgTAGCGCCTGAATTAGCTATATAGCGCCTGAATTAGCTATACGACACCGAACGTGCGACAA
2951_chr15:23600001-23650000_Seq_165_3435-3464	GCGTCGTTATGGTGCAACGTTAGCGCCTGAATTAGCTATACCTCTTGtattgtgatttttctctaatttcTAGCGCCTGAATTAGCTATATAGCGCCTGAATTAGCTATACGACACCGAACGTGCGACAA
2953_chr15:23600001-23650000_Seq_167_3475-3504	GCGTCGTTATGGTGCAACGTTAGCGCCTGAATTAGCTATACTTGACCCTATATTAAACGTATGTAACAATTAGCGCCTGAATTAGCTATATAGCGCCTGAATTAGCTATACGACACCGAACGTGCGACAA
2956_chr15:23600001-23650000_Seq_170_3535-3564	GCGTCGTTATGGTGCAACGTTAGCGCCTGAATTAGCTATAAAGTCTTTGGTTATGCCTAATTTTGAGGATTAGCGCCTGAATTAGCTATATAGCGCCTGAATTAGCTATACGACACCGAACGTGCGACAA
2959_chr15:23600001-23650000_Seq_173_3599-3628	GCGTCGTTATGGTGCAACGTTAGCGCCTGAATTAGCTATACATGATAATCATGTCAGAATTTGGTTCATATAGCGCCTGAATTAGCTATATAGCGCCTGAATTAGCTATACGACACCGAACGTGCGACAA
2962_chr15:23600001-23650000_Seq_176_3659-3688	GCGTCGTTATGGTGCAACGTTAGCGCCTGAATTAGCTATAACCCTCCCTTCTATTTTGGGAGTTCAGCTTTAGCGCCTGAATTAGCTATATAGCGCCTGAATTAGCTATACGACACCGAACGTGCGACAA
2965_chr15:23600001-23650000_Seq_179_3719-3748	GCGTCGTTATGGTGCAACGTTAGCGCCTGAATTAGCTATAGCTCATTCCTCCTCTTCTCTTTGGGTTGAATAGCGCCTGAATTAGCTATATAGCGCCTGAATTAGCTATACGACACCGAACGTGCGACAA
2968_chr15:23600001-23650000_Seq_182_3779-3808	GCGTCGTTATGGTGCAACGTTAGCGCCTGAATTAGCTATATGTCTGCTATTAGGGGATGAGCCTCTTCCATAGCGCCTGAATTAGCTATATAGCGCCTGAATTAGCTATACGACACCGAACGTGCGACAA
2971_chr15:23600001-23650000_Seq_185_3839-3868	GCGTCGTTATGGTGCAACGTTAGCGCCTGAATTAGCTATATACCTCAAAGGGACCAAGTGTCCTTGGTGGTAGCGCCTGAATTAGCTATATAGCGCCTGAATTAGCTATACGACACCGAACGTGCGACAA
2974_chr15:23600001-23650000_Seq_188_3899-3928	GCGTCGTTATGGTGCAACGTTAGCGCCTGAATTAGCTATATATCATTTTTATTTGGGGTGTTCAGAGAAATAGCGCCTGAATTAGCTATATAGCGCCTGAATTAGCTATACGACACCGAACGTGCGACAA
2977_chr15:23600001-23650000_Seq_191_3987-4016	GCGTCGTTATGGTGCAACGTTAGCGCCTGAATTAGCTATATGGTAGCTGGACAATACCTCTTGGGAAAAATAGCGCCTGAATTAGCTATATAGCGCCTGAATTAGCTATACGACACCGAACGTGCGACAA
2980_chr15:23600001-23650000_Seq_194_4047-4076	GCGTCGTTATGGTGCAACGTTAGCGCCTGAATTAGCTATACAATTCCATCCATGCCTCATAGATAGTGTATAGCGCCTGAATTAGCTATATAGCGCCTGAATTAGCTATACGACACCGAACGTGCGACAA
2983_chr15:23600001-23650000_Seq_197_4107-4136	GCGTCGTTATGGTGCAACGTTAGCGCCTGAATTAGCTATAGAGAGTACACTAATATTTGAGAATTGGGACTAGCGCCTGAATTAGCTATATAGCGCCTGAATTAGCTATACGACACCGAACGTGCGACAA
2986_chr15:23600001-23650000_Seq_211_4499-4528	GCGTCGTTATGGTGCAACGTTAGCGCCTGAATTAGCTATAGGCCTCCTATAAAAAGGCAAGTCTCCCttaTAGCGCCTGAATTAGCTATATAGCGCCTGAATTAGCTATACGACACCGAACGTGCGACAA
2989_chr15:23600001-23650000_Seq_214_4559-4588	GCGTCGTTATGGTGCAACGTTAGCGCCTGAATTAGCTATAGCTCATGGGCTGTGCCGTGGTTGAGGTGATTAGCGCCTGAATTAGCTATATAGCGCCTGAATTAGCTATACGACACCGAACGTGCGACAA
2992_chr15:23600001-23650000_Seq_217_4631-4660	GCGTCGTTATGGTGCAACGTTAGCGCCTGAATTAGCTATACTGAAATTACATAGCTTGGCACTCTGTCTCTAGCGCCTGAATTAGCTATATAGCGCCTGAATTAGCTATACGACACCGAACGTGCGACAA
2995_chr15:23600001-23650000_Seq_220_4691-4720	GCGTCGTTATGGTGCAACGTTAGCGCCTGAATTAGCTATAgtaagccaccgtgcccggcTTATTAGAGCATAGCGCCTGAATTAGCTATATAGCGCCTGAATTAGCTATACGACACCGAACGTGCGACAA
2998_chr15:23600001-23650000_Seq_234_5014-5043	GCGTCGTTATGGTGCAACGTTAGCGCCTGAATTAGCTATAAACTGACTAGGTTGAAATTGTGCCTGTAATTAGCGCCTGAATTAGCTATATAGCGCCTGAATTAGCTATACGACACCGAACGTGCGACAA
3001_chr15:23600001-23650000_Seq_237_5087-5116	GCGTCGTTATGGTGCAACGTTAGCGCCTGAATTAGCTATACAAGTCAGGAATGGCACAGCCTGAGTAAGGTAGCGCCTGAATTAGCTATATAGCGCCTGAATTAGCTATACGACACCGAACGTGCGACAA
3004_chr15:23600001-23650000_Seq_240_5147-5176	GCGTCGTTATGGTGCAACGTTAGCGCCTGAATTAGCTATAGGCCAAGACCTGCAGAGGCAACAGACCCCTTAGCGCCTGAATTAGCTATATAGCGCCTGAATTAGCTATACGACACCGAACGTGCGACAA
3006_chr15:23600001-23650000_Seq_242_5187-5216	GCGTCGTTATGGTGCAACGTTAGCGCCTGAATTAGCTATATTCCAGTGAACCCCCAGAGGGCAATTGTCTTAGCGCCTGAATTAGCTATATAGCGCCTGAATTAGCTATACGACACCGAACGTGCGACAA
3009_chr15:23600001-23650000_Seq_245_5247-5276	GCGTCGTTATGGTGCAACGTTAGCGCCTGAATTAGCTATAAGTACTGTGAATTGGGCACCTGTATCTAATTAGCGCCTGAATTAGCTATATAGCGCCTGAATTAGCTATACGACACCGAACGTGCGACAA
3012_chr15:23600001-23650000_Seq_248_5324-5353	GCGTCGTTATGGTGCAACGTTAGCGCCTGAATTAGCTATATACCAGAGATTGTTTTGCTGGCAATCCCCTTAGCGCCTGAATTAGCTATATAGCGCCTGAATTAGCTATACGACACCGAACGTGCGACAA
3015_chr15:23600001-23650000_Seq_251_5394-5423	GCGTCGTTATGGTGCAACGTTAGCGCCTGAATTAGCTATACAGTGGGGCCGCGGCCACTGGGAATTGTTTTAGCGCCTGAATTAGCTATATAGCGCCTGAATTAGCTATACGACACCGAACGTGCGACAA
3018_chr15:23600001-23650000_Seq_254_5454-5483	GCGTCGTTATGGTGCAACGTTAGCGCCTGAATTAGCTATACACTAAGGATTTAACTTGACTCTAACATGTTAGCGCCTGAATTAGCTATATAGCGCCTGAATTAGCTATACGACACCGAACGTGCGACAA
3021_chr15:23600001-23650000_Seq_257_5514-5543	GCGTCGTTATGGTGCAACGTTAGCGCCTGAATTAGCTATATTATGTGCCATCTCTATTGGGATGGGGCAGTAGCGCCTGAATTAGCTATATAGCGCCTGAATTAGCTATACGACACCGAACGTGCGACAA
3024_chr15:23600001-23650000_Seq_260_5574-5603	GCGTCGTTATGGTGCAACGTTAGCGCCTGAATTAGCTATAGAGGTCGGTAATGACAGTAATCACGTAGCCTAGCGCCTGAATTAGCTATATAGCGCCTGAATTAGCTATACGACACCGAACGTGCGACAA
3027_chr15:23600001-23650000_Seq_263_5650-5679	GCGTCGTTATGGTGCAACGTTAGCGCCTGAATTAGCTATATATAGAGGCCTCGAGTACAGGCCAGAGGGGTAGCGCCTGAATTAGCTATATAGCGCCTGAATTAGCTATACGACACCGAACGTGCGACAA
3030_chr15:23600001-23650000_Seq_266_5710-5739	GCGTCGTTATGGTGCAACGTTAGCGCCTGAATTAGCTATACTTTATTGGATGGACCTGACTGCTTAAATTTAGCGCCTGAATTAGCTATATAGCGCCTGAATTAGCTATACGACACCGAACGTGCGACAA
3033_chr15:23600001-23650000_Seq_269_5770-5799	GCGTCGTTATGGTGCAACGTTAGCGCCTGAATTAGCTATAAAGTCATTGGCTGTGAAAAAGGGCACCGGTTAGCGCCTGAATTAGCTATATAGCGCCTGAATTAGCTATACGACACCGAACGTGCGACAA
3036_chr15:23600001-23650000_Seq_284_6149-6178	GCGTCGTTATGGTGCAACGTTAGCGCCTGAATTAGCTATACATCTTTGAAAGTGAAAGCAGAcaggcacgTAGCGCCTGAATTAGCTATATAGCGCCTGAATTAGCTATACGACACCGAACGTGCGACAA
3039_chr15:23600001-23650000_Seq_287_6209-6238	GCGTCGTTATGGTGCAACGTTAGCGCCTGAATTAGCTATAAGCAAAGGCAGGACAATTTAAATATCCCAGTAGCGCCTGAATTAGCTATATAGCGCCTGAATTAGCTATACGACACCGAACGTGCGACAA
3042_chr15:23600001-23650000_Seq_290_6294-6323	GCGTCGTTATGGTGCAACGTTAGCGCCTGAATTAGCTATATCCCATTAGTAATATAACATCAATGCCATTTAGCGCCTGAATTAGCTATATAGCGCCTGAATTAGCTATACGACACCGAACGTGCGACAA
3045_chr15:23600001-23650000_Seq_293_6354-6383	GCGTCGTTATGGTGCAACGTTAGCGCCTGAATTAGCTATATGACCCATCCCCCTACCTTCTGAGAGTAGTTAGCGCCTGAATTAGCTATATAGCGCCTGAATTAGCTATACGACACCGAACGTGCGACAA
3048_chr15:23600001-23650000_Seq_296_6414-6443	GCGTCGTTATGGTGCAACGTTAGCGCCTGAATTAGCTATAACCACATGATCCACAAGAATGTAACAGTGGTAGCGCCTGAATTAGCTATATAGCGCCTGAATTAGCTATACGACACCGAACGTGCGACAA
3051_chr15:23600001-23650000_Seq_299_6474-6503	GCGTCGTTATGGTGCAACGTTAGCGCCTGAATTAGCTATAGGGATGTATCCTGTGAGAATGTGGTGCTTCTAGCGCCTGAATTAGCTATATAGCGCCTGAATTAGCTATACGACACCGAACGTGCGACAA
3054_chr15:23600001-23650000_Seq_302_6534-6563	GCGTCGTTATGGTGCAACGTTAGCGCCTGAATTAGCTATAGGGCATGTCCTTTAGGACAGGAAAAGCCCCTAGCGCCTGAATTAGCTATATAGCGCCTGAATTAGCTATACGACACCGAACGTGCGACAA
3057_chr15:23600001-23650000_Seq_305_6597-6626	GCGTCGTTATGGTGCAACGTTAGCGCCTGAATTAGCTATAAGATAGGCTTAAGTAGAAGAGACTTAAATATAGCGCCTGAATTAGCTATATAGCGCCTGAATTAGCTATACGACACCGAACGTGCGACAA
3060_chr15:23600001-23650000_Seq_308_6657-6686	GCGTCGTTATGGTGCAACGTTAGCGCCTGAATTAGCTATAGTAAATCTGCCTGTTGGGGTCCCTCCCAGTTAGCGCCTGAATTAGCTATATAGCGCCTGAATTAGCTATACGACACCGAACGTGCGACAA
3062_chr15:23600001-23650000_Seq_310_6697-6726	GCGTCGTTATGGTGCAACGTTAGCGCCTGAATTAGCTATATGATCCTGGAGAACAGATGGTAAAGCCTGTTAGCGCCTGAATTAGCTATATAGCGCCTGAATTAGCTATACGACACCGAACGTGCGACAA
3065_chr15:23600001-23650000_Seq_313_6757-6786	GCGTCGTTATGGTGCAACGTTAGCGCCTGAATTAGCTATATTTAGTGTAGAGACTCTATGATAGATACTCTAGCGCCTGAATTAGCTATATAGCGCCTGAATTAGCTATACGACACCGAACGTGCGACAA
3068_chr15:23600001-23650000_Seq_316_6817-6846	GCGTCGTTATGGTGCAACGTTAGCGCCTGAATTAGCTATAGTTAGTGACTGATTTTAGCTTCTTGGTTCATAGCGCCTGAATTAGCTATATAGCGCCTGAATTAGCTATACGACACCGAACGTGCGACAA
3071_chr15:23600001-23650000_Seq_319_6877-6906	GCGTCGTTATGGTGCAACGTTAGCGCCTGAATTAGCTATATCACAGGCTGTGCGAGCACCTCAGTCTCCATAGCGCCTGAATTAGCTATATAGCGCCTGAATTAGCTATACGACACCGAACGTGCGACAA
3074_chr15:23600001-23650000_Seq_322_6937-6966	GCGTCGTTATGGTGCAACGTTAGCGCCTGAATTAGCTATACCAAGCCACTGTTGGAAAACATCTGCACCATAGCGCCTGAATTAGCTATATAGCGCCTGAATTAGCTATACGACACCGAACGTGCGACAA
3077_chr15:23600001-23650000_Seq_325_6997-7026	GCGTCGTTATGGTGCAACGTTAGCGCCTGAATTAGCTATAggttttgtcctttcttgcaggtaccattttTAGCGCCTGAATTAGCTATATAGCGCCTGAATTAGCTATACGACACCGAACGTGCGACAA
3080_chr15:23600001-23650000_Seq_328_7057-7086	GCGTCGTTATGGTGCAACGTTAGCGCCTGAATTAGCTATAatagggctgagtgtgggggaagctacattcTAGCGCCTGAATTAGCTATATAGCGCCTGAATTAGCTATACGACACCGAACGTGCGACAA
3083_chr15:23600001-23650000_Seq_331_7117-7146	GCGTCGTTATGGTGCAACGTTAGCGCCTGAATTAGCTATAcacttggcaaaaggaggaagcaatggagttTAGCGCCTGAATTAGCTATATAGCGCCTGAATTAGCTATACGACACCGAACGTGCGACAA
3086_chr15:23600001-23650000_Seq_334_7177-7206	GCGTCGTTATGGTGCAACGTTAGCGCCTGAATTAGCTATAagtgcatgattgTACACAGACTCTCTTTCCTAGCGCCTGAATTAGCTATATAGCGCCTGAATTAGCTATACGACACCGAACGTGCGACAA
3089_chr15:23600001-23650000_Seq_337_7237-7266	GCGTCGTTATGGTGCAACGTTAGCGCCTGAATTAGCTATAccattagtcttatgggacccccgttgtataTAGCGCCTGAATTAGCTATATAGCGCCTGAATTAGCTATACGACACCGAACGTGCGACAA
3092_chr15:23600001-23650000_Seq_342_7355-7384	GCGTCGTTATGGTGCAACGTTAGCGCCTGAATTAGCTATAgcatgtataacttaaccacggggatatgttTAGCGCCTGAATTAGCTATATAGCGCCTGAATTAGCTATACGACACCGAACGTGCGACAA
3095_chr15:23600001-23650000_Seq_345_7415-7444	GCGTCGTTATGGTGCAACGTTAGCGCCTGAATTAGCTATATGCTGCTGCCCATTAACAGGCTGTGTTGTGTAGCGCCTGAATTAGCTATATAGCGCCTGAATTAGCTATACGACACCGAACGTGCGACAA
3098_chr15:23600001-23650000_Seq_348_7475-7504	GCGTCGTTATGGTGCAACGTTAGCGCCTGAATTAGCTATAGGGTGGATCCAAGGATGCTGATGCCATCCTTAGCGCCTGAATTAGCTATATAGCGCCTGAATTAGCTATACGACACCGAACGTGCGACAA
3101_chr15:23600001-23650000_Seq_351_7535-7564	GCGTCGTTATGGTGCAACGTTAGCGCCTGAATTAGCTATACTAGTCCCCACTTTTGGGCATGTCTTGTAGTAGCGCCTGAATTAGCTATATAGCGCCTGAATTAGCTATACGACACCGAACGTGCGACAA
3104_chr15:23600001-23650000_Seq_354_7595-7624	GCGTCGTTATGGTGCAACGTTAGCGCCTGAATTAGCTATACCATCTAGATAACCAAGTAGTTGGCCACAGTAGCGCCTGAATTAGCTATATAGCGCCTGAATTAGCTATACGACACCGAACGTGCGACAA
3107_chr15:23600001-23650000_Seq_357_7662-7691	GCGTCGTTATGGTGCAACGTTAGCGCCTGAATTAGCTATACCTTCCAGATGGCAGGTGCTCCAGTGAGGTTAGCGCCTGAATTAGCTATATAGCGCCTGAATTAGCTATACGACACCGAACGTGCGACAA
3110_chr15:23600001-23650000_Seq_360_7722-7751	GCGTCGTTATGGTGCAACGTTAGCGCCTGAATTAGCTATATGGCATTGGTTTGGGCCCACACATGTGAGATAGCGCCTGAATTAGCTATATAGCGCCTGAATTAGCTATACGACACCGAACGTGCGACAA
3113_chr15:23600001-23650000_Seq_363_7782-7811	GCGTCGTTATGGTGCAACGTTAGCGCCTGAATTAGCTATACTACAGACTTGCTGCTTTGTAAGCATGTCTTAGCGCCTGAATTAGCTATATAGCGCCTGAATTAGCTATACGACACCGAACGTGCGACAA
3115_chr15:23600001-23650000_Seq_365_7822-7851	GCGTCGTTATGGTGCAACGTTAGCGCCTGAATTAGCTATATGCCCATTCTGCTGGAAGATAAAGAATGTCTAGCGCCTGAATTAGCTATATAGCGCCTGAATTAGCTATACGACACCGAACGTGCGACAA
3118_chr15:23600001-23650000_Seq_368_7882-7911	GCGTCGTTATGGTGCAACGTTAGCGCCTGAATTAGCTATAaatgccccagtgataggtccagtccagtgtTAGCGCCTGAATTAGCTATATAGCGCCTGAATTAGCTATACGACACCGAACGTGCGACAA
3121_chr15:23600001-23650000_Seq_371_7942-7971	GCGTCGTTATGGTGCAACGTTAGCGCCTGAATTAGCTATAAGTGTTGGCATACATGGTGCAGTTGtaagtTAGCGCCTGAATTAGCTATATAGCGCCTGAATTAGCTATACGACACCGAACGTGCGACAA
3124_chr15:23600001-23650000_Seq_374_8002-8031	GCGTCGTTATGGTGCAACGTTAGCGCCTGAATTAGCTATAGTGTGAATAAGGTCAATCCACTCCAGGAATTAGCGCCTGAATTAGCTATATAGCGCCTGAATTAGCTATACGACACCGAACGTGCGACAA
3127_chr15:23600001-23650000_Seq_377_8062-8091	GCGTCGTTATGGTGCAACGTTAGCGCCTGAATTAGCTATAGAGAGCATTCTTTGTGGCTACGTTGCTGGGTAGCGCCTGAATTAGCTATATAGCGCCTGAATTAGCTATACGACACCGAACGTGCGACAA
3130_chr15:23600001-23650000_Seq_380_8122-8151	GCGTCGTTATGGTGCAACGTTAGCGCCTGAATTAGCTATAAAGCAGCAGTATGTCTGCTGGGATGGGCTATAGCGCCTGAATTAGCTATATAGCGCCTGAATTAGCTATACGACACCGAACGTGCGACAA
3133_chr15:23600001-23650000_Seq_383_8182-8211	GCGTCGTTATGGTGCAACGTTAGCGCCTGAATTAGCTATAAGGACCTGTAGGCACCCAAATGCAATAAGATAGCGCCTGAATTAGCTATATAGCGCCTGAATTAGCTATACGACACCGAACGTGCGACAA
3136_chr15:23600001-23650000_Seq_386_8242-8271	GCGTCGTTATGGTGCAACGTTAGCGCCTGAATTAGCTATAtGGTTTTTGGCCCATTGTTGAACAGCAAGTTAGCGCCTGAATTAGCTATATAGCGCCTGAATTAGCTATACGACACCGAACGTGCGACAA
3139_chr15:23600001-23650000_Seq_389_8302-8331	GCGTCGTTATGGTGCAACGTTAGCGCCTGAATTAGCTATActttcagttaggactagtgcatgaggtctgTAGCGCCTGAATTAGCTATATAGCGCCTGAATTAGCTATACGACACCGAACGTGCGACAA
3142_chr15:23600001-23650000_Seq_392_8362-8391	GCGTCGTTATGGTGCAACGTTAGCGCCTGAATTAGCTATAATTGAGAGTTCAAAAACTCActgtaatttgTAGCGCCTGAATTAGCTATATAGCGCCTGAATTAGCTATACGACACCGAACGTGCGACAA
3145_chr15:23600001-23650000_Seq_395_8422-8451	GCGTCGTTATGGTGCAACGTTAGCGCCTGAATTAGCTATACGTGGAAACCTGTAGTCCAAGAGTTAAGGATAGCGCCTGAATTAGCTATATAGCGCCTGAATTAGCTATACGACACCGAACGTGCGACAA
3148_chr15:23600001-23650000_Seq_398_8482-8511	GCGTCGTTATGGTGCAACGTTAGCGCCTGAATTAGCTATAAGGGGAGTCTCCTGATAATATCAGAGCCATTAGCGCCTGAATTAGCTATATAGCGCCTGAATTAGCTATACGACACCGAACGTGCGACAA
3151_chr15:23600001-23650000_Seq_401_8542-8571	GCGTCGTTATGGTGCAACGTTAGCGCCTGAATTAGCTATAGTGATGAGTTTTATTGAGGAATGAATGTGGTAGCGCCTGAATTAGCTATATAGCGCCTGAATTAGCTATACGACACCGAACGTGCGACAA
3154_chr15:23600001-23650000_Seq_404_8608-8637	GCGTCGTTATGGTGCAACGTTAGCGCCTGAATTAGCTATAGTTATCAACCCACAATTAGTCCATCAATGTTAGCGCCTGAATTAGCTATATAGCGCCTGAATTAGCTATACGACACCGAACGTGCGACAA
3157_chr15:23600001-23650000_Seq_407_8668-8697	GCGTCGTTATGGTGCAACGTTAGCGCCTGAATTAGCTATAGTCAAGCAGCAAGCATGAGGGACATACAGTTAGCGCCTGAATTAGCTATATAGCGCCTGAATTAGCTATACGACACCGAACGTGCGACAA
3160_chr15:23600001-23650000_Seq_410_8728-8757	GCGTCGTTATGGTGCAACGTTAGCGCCTGAATTAGCTATAAGATCCTTAAAACTTGAGTAAAGCCTCAGGTAGCGCCTGAATTAGCTATATAGCGCCTGAATTAGCTATACGACACCGAACGTGCGACAA
3163_chr15:23600001-23650000_Seq_413_8803-8832	GCGTCGTTATGGTGCAACGTTAGCGCCTGAATTAGCTATAGCTGCTGCTGGGACCAGGAACGGTGATCTCTAGCGCCTGAATTAGCTATATAGCGCCTGAATTAGCTATACGACACCGAACGTGCGACAA
3166_chr15:23600001-23650000_Seq_416_8880-8909	GCGTCGTTATGGTGCAACGTTAGCGCCTGAATTAGCTATAAAATGGTAGTCATTTTCTAAAATGACTGGCTAGCGCCTGAATTAGCTATATAGCGCCTGAATTAGCTATACGACACCGAACGTGCGACAA
3169_chr15:23600001-23650000_Seq_419_8940-8969	GCGTCGTTATGGTGCAACGTTAGCGCCTGAATTAGCTATATAGGTGCTTCCCATATGGAGTGTTGGGCCTTAGCGCCTGAATTAGCTATATAGCGCCTGAATTAGCTATACGACACCGAACGTGCGACAA
3171_chr15:23600001-23650000_Seq_421_8980-9009	GCGTCGTTATGGTGCAACGTTAGCGCCTGAATTAGCTATAGTGGATTGCTTTAGACATATGTCCAGGGCCTAGCGCCTGAATTAGCTATATAGCGCCTGAATTAGCTATACGACACCGAACGTGCGACAA
3174_chr15:23600001-23650000_Seq_424_9040-9069	GCGTCGTTATGGTGCAACGTTAGCGCCTGAATTAGCTATATGGCTTTTGTTTGGGAGGAGAAACTTGAATTAGCGCCTGAATTAGCTATATAGCGCCTGAATTAGCTATACGACACCGAACGTGCGACAA
3177_chr15:23600001-23650000_Seq_427_9100-9129	GCGTCGTTATGGTGCAACGTTAGCGCCTGAATTAGCTATATGCAGCAAACAAGACTAAGACACAAAACCATAGCGCCTGAATTAGCTATATAGCGCCTGAATTAGCTATACGACACCGAACGTGCGACAA
3180_chr15:23600001-23650000_Seq_430_9160-9189	GCGTCGTTATGGTGCAACGTTAGCGCCTGAATTAGCTATAGGCATGTCCCATGGTACTCAGGAGCAAGCCTAGCGCCTGAATTAGCTATATAGCGCCTGAATTAGCTATACGACACCGAACGTGCGACAA
3183_chr15:23600001-23650000_Seq_433_9220-9249	GCGTCGTTATGGTGCAACGTTAGCGCCTGAATTAGCTATAGGTCTCCAACATTCTGTTTTGTCACCCAGTTAGCGCCTGAATTAGCTATATAGCGCCTGAATTAGCTATACGACACCGAACGTGCGACAA
3186_chr15:23600001-23650000_Seq_436_9300-9329	GCGTCGTTATGGTGCAACGTTAGCGCCTGAATTAGCTATAGAACATCTGTTCCATGTGCTATAGAAGGCATAGCGCCTGAATTAGCTATATAGCGCCTGAATTAGCTATACGACACCGAACGTGCGACAA
3189_chr15:23600001-23650000_Seq_439_9360-9389	GCGTCGTTATGGTGCAACGTTAGCGCCTGAATTAGCTATAATTCTCATTTTTAGAAGAATGGCTTGTAGGTAGCGCCTGAATTAGCTATATAGCGCCTGAATTAGCTATACGACACCGAACGTGCGACAA
3192_chr15:23600001-23650000_Seq_442_9432-9461	GCGTCGTTATGGTGCAACGTTAGCGCCTGAATTAGCTATATGTTCGTTCCAGGCTGGGATGTTTGAACAGTAGCGCCTGAATTAGCTATATAGCGCCTGAATTAGCTATACGACACCGAACGTGCGACAA
3195_chr15:23600001-23650000_Seq_445_9492-9521	GCGTCGTTATGGTGCAACGTTAGCGCCTGAATTAGCTATATGGAGTCCCTCTCAGCAGTCAAAGATTTTGTAGCGCCTGAATTAGCTATATAGCGCCTGAATTAGCTATACGACACCGAACGTGCGACAA
3198_chr15:23600001-23650000_Seq_448_9552-9581	GCGTCGTTATGGTGCAACGTTAGCGCCTGAATTAGCTATATCCATCTACAGTAGATAAACACTTTGGCCATAGCGCCTGAATTAGCTATATAGCGCCTGAATTAGCTATACGACACCGAACGTGCGACAA
3201_chr15:23600001-23650000_Seq_451_9612-9641	GCGTCGTTATGGTGCAACGTTAGCGCCTGAATTAGCTATAGAAGCTTATTATCAGAGCACAAAGTTCTTTTAGCGCCTGAATTAGCTATATAGCGCCTGAATTAGCTATACGACACCGAACGTGCGACAA
3204_chr15:23600001-23650000_Seq_454_9672-9701	GCGTCGTTATGGTGCAACGTTAGCGCCTGAATTAGCTATATAAGAATAGCTGTGTGGGCGTCATGGTGGCTAGCGCCTGAATTAGCTATATAGCGCCTGAATTAGCTATACGACACCGAACGTGCGACAA
3207_chr15:23600001-23650000_Seq_457_9732-9761	GCGTCGTTATGGTGCAACGTTAGCGCCTGAATTAGCTATAAAGGATAAGTGTCTATCTGATATGGTGGTCTAGCGCCTGAATTAGCTATATAGCGCCTGAATTAGCTATACGACACCGAACGTGCGACAA
3210_chr15:23600001-23650000_Seq_460_9792-9821	GCGTCGTTATGGTGCAACGTTAGCGCCTGAATTAGCTATATCATCTTTGTAGATGCATGTCACCCTGGAGTAGCGCCTGAATTAGCTATATAGCGCCTGAATTAGCTATACGACACCGAACGTGCGACAA
3213_chr15:23600001-23650000_Seq_463_9852-9881	GCGTCGTTATGGTGCAACGTTAGCGCCTGAATTAGCTATAtagccagagtgcccagTTTTGATGGTGTCTTAGCGCCTGAATTAGCTATATAGCGCCTGAATTAGCTATACGACACCGAACGTGCGACAA
3216_chr15:23600001-23650000_Seq_466_9912-9941	GCGTCGTTATGGTGCAACGTTAGCGCCTGAATTAGCTATAGGTTGAGATCTCACTATACGTCCATCACtgTAGCGCCTGAATTAGCTATATAGCGCCTGAATTAGCTATACGACACCGAACGTGCGACAA
3219_chr15:23600001-23650000_Seq_469_9972-10001	GCGTCGTTATGGTGCAACGTTAGCGCCTGAATTAGCTATATTAACAAATTCAGTCCCTAAGATGGAGTTTTAGCGCCTGAATTAGCTATATAGCGCCTGAATTAGCTATACGACACCGAACGTGCGACAA
3222_chr15:23600001-23650000_Seq_472_10057-10086	GCGTCGTTATGGTGCAACGTTAGCGCCTGAATTAGCTATActGATTTTTCTGAAGCATTTTTATTCTGCTTAGCGCCTGAATTAGCTATATAGCGCCTGAATTAGCTATACGACACCGAACGTGCGACAA
3224_chr15:23600001-23650000_Seq_474_10097-10126	GCGTCGTTATGGTGCAACGTTAGCGCCTGAATTAGCTATAtaagagattttccccaacttcccaagcctgTAGCGCCTGAATTAGCTATATAGCGCCTGAATTAGCTATACGACACCGAACGTGCGACAA
3227_chr15:23600001-23650000_Seq_477_10157-10186	GCGTCGTTATGGTGCAACGTTAGCGCCTGAATTAGCTATAGAGGACTGTAGCTGGGGAGAACCTGAAAACTAGCGCCTGAATTAGCTATATAGCGCCTGAATTAGCTATACGACACCGAACGTGCGACAA
3230_chr15:23600001-23650000_Seq_480_10235-10264	GCGTCGTTATGGTGCAACGTTAGCGCCTGAATTAGCTATACATATTTTATGTACCATTTACACACACACATAGCGCCTGAATTAGCTATATAGCGCCTGAATTAGCTATACGACACCGAACGTGCGACAA
3233_chr15:23600001-23650000_Seq_485_10491-10520	GCGTCGTTATGGTGCAACGTTAGCGCCTGAATTAGCTATAgccaccaaaaatacttttataatttatcccTAGCGCCTGAATTAGCTATATAGCGCCTGAATTAGCTATACGACACCGAACGTGCGACAA
3236_chr15:23600001-23650000_Seq_488_10556-10585	GCGTCGTTATGGTGCAACGTTAGCGCCTGAATTAGCTATAgcaagttgtttttgtcttcagaattttaacTAGCGCCTGAATTAGCTATATAGCGCCTGAATTAGCTATACGACACCGAACGTGCGACAA
3239_chr15:23600001-23650000_Seq_529_11578-11607	GCGTCGTTATGGTGCAACGTTAGCGCCTGAATTAGCTATAggttgatgagtctattttctttttcttttcTAGCGCCTGAATTAGCTATATAGCGCCTGAATTAGCTATACGACACCGAACGTGCGACAA
3242_chr15:23600001-23650000_Seq_532_11649-11678	GCGTCGTTATGGTGCAACGTTAGCGCCTGAATTAGCTATAggcacctttgttaaaaatttattgactacaTAGCGCCTGAATTAGCTATATAGCGCCTGAATTAGCTATACGACACCGAACGTGCGACAA
3245_chr15:23600001-23650000_Seq_535_11709-11738	GCGTCGTTATGGTGCAACGTTAGCGCCTGAATTAGCTATAtatgcacttttcccaacaccacttattgaaTAGCGCCTGAATTAGCTATATAGCGCCTGAATTAGCTATACGACACCGAACGTGCGACAA
3248_chr15:23600001-23650000_Seq_538_11770-11799	GCGTCGTTATGGTGCAACGTTAGCGCCTGAATTAGCTATAaatttgagtttatttttgtacagggtgtgaTAGCGCCTGAATTAGCTATATAGCGCCTGAATTAGCTATACGACACCGAACGTGCGACAA
3251_chr15:23600001-23650000_Seq_542_11858-11887	GCGTCGTTATGGTGCAACGTTAGCGCCTGAATTAGCTATAttgcccagaccaatgttgtgtagcttttccTAGCGCCTGAATTAGCTATATAGCGCCTGAATTAGCTATACGACACCGAACGTGCGACAA
3254_chr15:23600001-23650000_Seq_547_12021-12050	GCGTCGTTATGGTGCAACGTTAGCGCCTGAATTAGCTATAatcagatgtatggctttcaagtattttctcTAGCGCCTGAATTAGCTATATAGCGCCTGAATTAGCTATACGACACCGAACGTGCGACAA
3257_chr15:23600001-23650000_Seq_553_12187-12216	GCGTCGTTATGGTGCAACGTTAGCGCCTGAATTAGCTATAtttctgatgattagtggtgtcaaacacttcTAGCGCCTGAATTAGCTATATAGCGCCTGAATTAGCTATACGACACCGAACGTGCGACAA
3260_chr15:23600001-23650000_Seq_557_12267-12296	GCGTCGTTATGGTGCAACGTTAGCGCCTGAATTAGCTATAccaacacgaattgttcattgttttgacaatTAGCGCCTGAATTAGCTATATAGCGCCTGAATTAGCTATACGACACCGAACGTGCGACAA
3263_chr15:23600001-23650000_Seq_564_12414-12443	GCGTCGTTATGGTGCAACGTTAGCGCCTGAATTAGCTATAtgattttaaattgtgggggtatatatccagTAGCGCCTGAATTAGCTATATAGCGCCTGAATTAGCTATACGACACCGAACGTGCGACAA
3266_chr15:23600001-23650000_Seq_572_12602-12631	GCGTCGTTATGGTGCAACGTTAGCGCCTGAATTAGCTATAcacaaatgacagaatttctttcttaaggttTAGCGCCTGAATTAGCTATATAGCGCCTGAATTAGCTATACGACACCGAACGTGCGACAA
3269_chr15:23600001-23650000_Seq_576_12682-12711	GCGTCGTTATGGTGCAACGTTAGCGCCTGAATTAGCTATAtgagtgaggtaacacagtatttgtctttctTAGCGCCTGAATTAGCTATATAGCGCCTGAATTAGCTATACGACACCGAACGTGCGACAA
3272_chr15:23600001-23650000_Seq_580_12764-12793	GCGTCGTTATGGTGCAACGTTAGCGCCTGAATTAGCTATAtctccctactaactctatcccttcatcctcTAGCGCCTGAATTAGCTATATAGCGCCTGAATTAGCTATACGACACCGAACGTGCGACAA
3275_chr15:23600001-23650000_Seq_583_12824-12853	GCGTCGTTATGGTGCAACGTTAGCGCCTGAATTAGCTATAccaaagaaaataaaacttacttgtccaatcTAGCGCCTGAATTAGCTATATAGCGCCTGAATTAGCTATACGACACCGAACGTGCGACAA
3278_chr15:23600001-23650000_Seq_586_12884-12913	GCGTCGTTATGGTGCAACGTTAGCGCCTGAATTAGCTATAcggttttgaagtgtactctacattttcattTAGCGCCTGAATTAGCTATATAGCGCCTGAATTAGCTATACGACACCGAACGTGCGACAA
3280_chr15:23600001-23650000_Seq_588_12945-12974	GCGTCGTTATGGTGCAACGTTAGCGCCTGAATTAGCTATAacgtgtgtatcagcccacatacccgtttttTAGCGCCTGAATTAGCTATATAGCGCCTGAATTAGCTATACGACACCGAACGTGCGACAA
3283_chr15:23600001-23650000_Seq_591_13109-13138	GCGTCGTTATGGTGCAACGTTAGCGCCTGAATTAGCTATATGGTGAAAATAAGTCACCCTGTGTTCACTTTAGCGCCTGAATTAGCTATATAGCGCCTGAATTAGCTATACGACACCGAACGTGCGACAA
3286_chr15:23600001-23650000_Seq_594_13169-13198	GCGTCGTTATGGTGCAACGTTAGCGCCTGAATTAGCTATAAATGCCTTCATAGCCTTGAGATCTGAAGTGTAGCGCCTGAATTAGCTATATAGCGCCTGAATTAGCTATACGACACCGAACGTGCGACAA
3289_chr15:23600001-23650000_Seq_597_13229-13258	GCGTCGTTATGGTGCAACGTTAGCGCCTGAATTAGCTATACAAAAACACCATGCGTCCTTCAGTCACAGATAGCGCCTGAATTAGCTATATAGCGCCTGAATTAGCTATACGACACCGAACGTGCGACAA
3292_chr15:23600001-23650000_Seq_600_13289-13318	GCGTCGTTATGGTGCAACGTTAGCGCCTGAATTAGCTATAACCATGATCACCTTTCACCCTCTCTCTGTGTAGCGCCTGAATTAGCTATATAGCGCCTGAATTAGCTATACGACACCGAACGTGCGACAA
3295_chr15:23600001-23650000_Seq_603_13349-13378	GCGTCGTTATGGTGCAACGTTAGCGCCTGAATTAGCTATACATTATGAGATGTCAGTTATAAGAATCATCTAGCGCCTGAATTAGCTATATAGCGCCTGAATTAGCTATACGACACCGAACGTGCGACAA
3298_chr15:23600001-23650000_Seq_606_13409-13438	GCGTCGTTATGGTGCAACGTTAGCGCCTGAATTAGCTATATGTGTGTATGTACATATATTTACTTCCAGCTAGCGCCTGAATTAGCTATATAGCGCCTGAATTAGCTATACGACACCGAACGTGCGACAA
3301_chr15:23600001-23650000_Seq_609_13471-13500	GCGTCGTTATGGTGCAACGTTAGCGCCTGAATTAGCTATAcaacaaatcaattttgggaaaacacaaagaTAGCGCCTGAATTAGCTATATAGCGCCTGAATTAGCTATACGACACCGAACGTGCGACAA
3304_chr15:23600001-23650000_Seq_612_13531-13560	GCGTCGTTATGGTGCAACGTTAGCGCCTGAATTAGCTATAgatctaatcaccagcaaaaagcccctcaccTAGCGCCTGAATTAGCTATATAGCGCCTGAATTAGCTATACGACACCGAACGTGCGACAA
3307_chr15:23600001-23650000_Seq_616_13611-13640	GCGTCGTTATGGTGCAACGTTAGCGCCTGAATTAGCTATAacatggaggaaagggtgaaagagctctccaTAGCGCCTGAATTAGCTATATAGCGCCTGAATTAGCTATACGACACCGAACGTGCGACAA
3310_chr15:23600001-23650000_Seq_622_13731-13760	GCGTCGTTATGGTGCAACGTTAGCGCCTGAATTAGCTATAgacatttagttctcatagatttgtaggctgTAGCGCCTGAATTAGCTATATAGCGCCTGAATTAGCTATACGACACCGAACGTGCGACAA
3313_chr15:23600001-23650000_Seq_627_13831-13860	GCGTCGTTATGGTGCAACGTTAGCGCCTGAATTAGCTATAAGTTATTTATTTTGCTCTATGGGATCTCCTTAGCGCCTGAATTAGCTATATAGCGCCTGAATTAGCTATACGACACCGAACGTGCGACAA
3316_chr15:23600001-23650000_Seq_630_13904-13933	GCGTCGTTATGGTGCAACGTTAGCGCCTGAATTAGCTATAAAGTCTGTGAACCCTTCCCTCTAATCAATCTAGCGCCTGAATTAGCTATATAGCGCCTGAATTAGCTATACGACACCGAACGTGCGACAA
3319_chr15:23600001-23650000_Seq_633_13966-13995	GCGTCGTTATGGTGCAACGTTAGCGCCTGAATTAGCTATAggcattaaataCAAATTTTTACAGTGTGTCTAGCGCCTGAATTAGCTATATAGCGCCTGAATTAGCTATACGACACCGAACGTGCGACAA
3322_chr15:23600001-23650000_Seq_636_14026-14055	GCGTCGTTATGGTGCAACGTTAGCGCCTGAATTAGCTATActgaaggctaccactggatatgcaagaaggTAGCGCCTGAATTAGCTATATAGCGCCTGAATTAGCTATACGACACCGAACGTGCGACAA
3325_chr15:23600001-23650000_Seq_670_14806-14835	GCGTCGTTATGGTGCAACGTTAGCGCCTGAATTAGCTATAgtggcacatataccacatatacactatggaTAGCGCCTGAATTAGCTATATAGCGCCTGAATTAGCTATACGACACCGAACGTGCGACAA
3328_chr15:23600001-23650000_Seq_677_14946-14975	GCGTCGTTATGGTGCAACGTTAGCGCCTGAATTAGCTATAggggcaatggctgataatagaactatggttTAGCGCCTGAATTAGCTATATAGCGCCTGAATTAGCTATACGACACCGAACGTGCGACAA
3331_chr15:23600001-23650000_Seq_680_15006-15035	GCGTCGTTATGGTGCAACGTTAGCGCCTGAATTAGCTATAggagatagtgagtatacacaatgttttggaTAGCGCCTGAATTAGCTATATAGCGCCTGAATTAGCTATACGACACCGAACGTGCGACAA
3333_chr15:23600001-23650000_Seq_688_15193-15222	GCGTCGTTATGGTGCAACGTTAGCGCCTGAATTAGCTATActggacgtgttggtgggcgcttgtagtcccTAGCGCCTGAATTAGCTATATAGCGCCTGAATTAGCTATACGACACCGAACGTGCGACAA
3336_chr15:23600001-23650000_Seq_696_15377-15406	GCGTCGTTATGGTGCAACGTTAGCGCCTGAATTAGCTATAgtggtgaaagccagagtggagtggctttaaTAGCGCCTGAATTAGCTATATAGCGCCTGAATTAGCTATACGACACCGAACGTGCGACAA
3339_chr15:23600001-23650000_Seq_699_15437-15466	GCGTCGTTATGGTGCAACGTTAGCGCCTGAATTAGCTATAtggattcagcaacatggagatcatccatgaTAGCGCCTGAATTAGCTATATAGCGCCTGAATTAGCTATACGACACCGAACGTGCGACAA
3342_chr15:23600001-23650000_Seq_703_15517-15546	GCGTCGTTATGGTGCAACGTTAGCGCCTGAATTAGCTATAgtatgtcattgaagaagacaccatcagatgTAGCGCCTGAATTAGCTATATAGCGCCTGAATTAGCTATACGACACCGAACGTGCGACAA
3345_chr15:23600001-23650000_Seq_706_15577-15606	GCGTCGTTATGGTGCAACGTTAGCGCCTGAATTAGCTATAggaaccagaggtaagagaagcaccgaggggTAGCGCCTGAATTAGCTATATAGCGCCTGAATTAGCTATACGACACCGAACGTGCGACAA
3348_chr15:23600001-23650000_Seq_709_15658-15687	GCGTCGTTATGGTGCAACGTTAGCGCCTGAATTAGCTATAgcaacagggatgaaaccctggatgcactttTAGCGCCTGAATTAGCTATATAGCGCCTGAATTAGCTATACGACACCGAACGTGCGACAA
3351_chr15:23600001-23650000_Seq_712_15718-15747	GCGTCGTTATGGTGCAACGTTAGCGCCTGAATTAGCTATAgttatttaaagccatataacttgatgaggtTAGCGCCTGAATTAGCTATATAGCGCCTGAATTAGCTATACGACACCGAACGTGCGACAA
3354_chr15:23600001-23650000_Seq_715_15795-15824	GCGTCGTTATGGTGCAACGTTAGCGCCTGAATTAGCTATAcatataagtgaaacttaggaacttaggaggTAGCGCCTGAATTAGCTATATAGCGCCTGAATTAGCTATACGACACCGAACGTGCGACAA
3357_chr15:23600001-23650000_Seq_718_15855-15884	GCGTCGTTATGGTGCAACGTTAGCGCCTGAATTAGCTATAttttaaaggtatcagacatccattagacatTAGCGCCTGAATTAGCTATATAGCGCCTGAATTAGCTATACGACACCGAACGTGCGACAA
3360_chr15:23600001-23650000_Seq_721_15915-15944	GCGTCGTTATGGTGCAACGTTAGCGCCTGAATTAGCTATAttattgctgatggaacagtttttgagggacTAGCGCCTGAATTAGCTATATAGCGCCTGAATTAGCTATACGACACCGAACGTGCGACAA
3363_chr15:23600001-23650000_Seq_724_15975-16004	GCGTCGTTATGGTGCAACGTTAGCGCCTGAATTAGCTATAcaaatgcaagggtctgagcaattggaaagaTAGCGCCTGAATTAGCTATATAGCGCCTGAATTAGCTATACGACACCGAACGTGCGACAA
3366_chr15:23600001-23650000_Seq_727_16038-16067	GCGTCGTTATGGTGCAACGTTAGCGCCTGAATTAGCTATAgagcctgcaaaatttcctaccagcctccatTAGCGCCTGAATTAGCTATATAGCGCCTGAATTAGCTATACGACACCGAACGTGCGACAA
3369_chr15:23600001-23650000_Seq_731_16154-16183	GCGTCGTTATGGTGCAACGTTAGCGCCTGAATTAGCTATAgctagaaatgatggtggctttttaccagagTAGCGCCTGAATTAGCTATATAGCGCCTGAATTAGCTATACGACACCGAACGTGCGACAA
3372_chr15:23600001-23650000_Seq_748_16539-16568	GCGTCGTTATGGTGCAACGTTAGCGCCTGAATTAGCTATAtaacagcacgatagtggaagcagggaaattTAGCGCCTGAATTAGCTATATAGCGCCTGAATTAGCTATACGACACCGAACGTGCGACAA
3375_chr15:23600001-23650000_Seq_751_16599-16628	GCGTCGTTATGGTGCAACGTTAGCGCCTGAATTAGCTATAggagtcgtaagacttgggttttgaaataatTAGCGCCTGAATTAGCTATATAGCGCCTGAATTAGCTATACGACACCGAACGTGCGACAA
3378_chr15:23600001-23650000_Seq_754_16659-16688	GCGTCGTTATGGTGCAACGTTAGCGCCTGAATTAGCTATAaataaagcattgcaaggattttagctttgaTAGCGCCTGAATTAGCTATATAGCGCCTGAATTAGCTATACGACACCGAACGTGCGACAA
3381_chr15:23600001-23650000_Seq_758_16739-16768	GCGTCGTTATGGTGCAACGTTAGCGCCTGAATTAGCTATAtcaaagaacaacagaaggccatcgtgactgTAGCGCCTGAATTAGCTATATAGCGCCTGAATTAGCTATACGACACCGAACGTGCGACAA
3384_chr15:23600001-23650000_Seq_761_16799-16828	GCGTCGTTATGGTGCAACGTTAGCGCCTGAATTAGCTATAtatgcaccgtgcagagggaaagccagtgtaTAGCGCCTGAATTAGCTATATAGCGCCTGAATTAGCTATACGACACCGAACGTGCGACAA
3387_chr15:23600001-23650000_Seq_764_16859-16888	GCGTCGTTATGGTGCAACGTTAGCGCCTGAATTAGCTATAaggcttgaatgagatcaaatcatttcaacaTAGCGCCTGAATTAGCTATATAGCGCCTGAATTAGCTATACGACACCGAACGTGCGACAA
3389_chr15:23600001-23650000_Seq_766_16899-16928	GCGTCGTTATGGTGCAACGTTAGCGCCTGAATTAGCTATAttccaggaagagctgcaattttatgtggaaTAGCGCCTGAATTAGCTATATAGCGCCTGAATTAGCTATACGACACCGAACGTGCGACAA
3392_chr15:23600001-23650000_Seq_769_17030-17059	GCGTCGTTATGGTGCAACGTTAGCGCCTGAATTAGCTATAgagcttacattctattagaaaagccaaaaaTAGCGCCTGAATTAGCTATATAGCGCCTGAATTAGCTATACGACACCGAACGTGCGACAA
3395_chr15:23600001-23650000_Seq_772_17103-17132	GCGTCGTTATGGTGCAACGTTAGCGCCTGAATTAGCTATAgctgtgttctgggaacgactccgggagattTAGCGCCTGAATTAGCTATATAGCGCCTGAATTAGCTATACGACACCGAACGTGCGACAA
3398_chr15:23600001-23650000_Seq_775_17197-17226	GCGTCGTTATGGTGCAACGTTAGCGCCTGAATTAGCTATAgggctttattctccttgattctcttcaaaaTAGCGCCTGAATTAGCTATATAGCGCCTGAATTAGCTATACGACACCGAACGTGCGACAA
3401_chr15:23600001-23650000_Seq_778_17273-17302	GCGTCGTTATGGTGCAACGTTAGCGCCTGAATTAGCTATAggcaagatctttgttaagattctttgaaatTAGCGCCTGAATTAGCTATATAGCGCCTGAATTAGCTATACGACACCGAACGTGCGACAA
3404_chr15:23600001-23650000_Seq_781_17333-17362	GCGTCGTTATGGTGCAACGTTAGCGCCTGAATTAGCTATATCTACTGCATTTTTGTGTTCtttcaagtctTAGCGCCTGAATTAGCTATATAGCGCCTGAATTAGCTATACGACACCGAACGTGCGACAA
3407_chr15:23600001-23650000_Seq_794_17627-17656	GCGTCGTTATGGTGCAACGTTAGCGCCTGAATTAGCTATAactttgggaggtgatgcggagggatcacgaTAGCGCCTGAATTAGCTATATAGCGCCTGAATTAGCTATACGACACCGAACGTGCGACAA
3410_chr15:23600001-23650000_Seq_798_17707-17736	GCGTCGTTATGGTGCAACGTTAGCGCCTGAATTAGCTATATCTGACAATAGCTACCTCACTATGATGATTTAGCGCCTGAATTAGCTATATAGCGCCTGAATTAGCTATACGACACCGAACGTGCGACAA
3413_chr15:23600001-23650000_Seq_803_17849-17878	GCGTCGTTATGGTGCAACGTTAGCGCCTGAATTAGCTATAgcctccaactccatccatattcctgcaataTAGCGCCTGAATTAGCTATATAGCGCCTGAATTAGCTATACGACACCGAACGTGCGACAA
3416_chr15:23600001-23650000_Seq_808_17950-17979	GCGTCGTTATGGTGCAACGTTAGCGCCTGAATTAGCTATAcctctttctgtccatgtgtcctcataatttTAGCGCCTGAATTAGCTATATAGCGCCTGAATTAGCTATACGACACCGAACGTGCGACAA
3419_chr15:23600001-23650000_Seq_811_18040-18069	GCGTCGTTATGGTGCAACGTTAGCGCCTGAATTAGCTATAgccaccgtgccctgcccaaaagttatttttTAGCGCCTGAATTAGCTATATAGCGCCTGAATTAGCTATACGACACCGAACGTGCGACAA
3422_chr15:23600001-23650000_Seq_827_18424-18453	GCGTCGTTATGGTGCAACGTTAGCGCCTGAATTAGCTATAttatatagataagctcatgtcacaagcgttTAGCGCCTGAATTAGCTATATAGCGCCTGAATTAGCTATACGACACCGAACGTGCGACAA
3425_chr15:23600001-23650000_Seq_831_18554-18583	GCGTCGTTATGGTGCAACGTTAGCGCCTGAATTAGCTATAAATATAGAGGTCACCTGCTTGAATCTTGCTTAGCGCCTGAATTAGCTATATAGCGCCTGAATTAGCTATACGACACCGAACGTGCGACAA
3428_chr15:23600001-23650000_Seq_834_18614-18643	GCGTCGTTATGGTGCAACGTTAGCGCCTGAATTAGCTATAttctgtgtacatgtgtttttgtgtgagggtTAGCGCCTGAATTAGCTATATAGCGCCTGAATTAGCTATACGACACCGAACGTGCGACAA
3431_chr15:23600001-23650000_Seq_837_18674-18703	GCGTCGTTATGGTGCAACGTTAGCGCCTGAATTAGCTATAatttgtgtttgtgtatgcaagtgtttctgtTAGCGCCTGAATTAGCTATATAGCGCCTGAATTAGCTATACGACACCGAACGTGCGACAA
3434_chr15:23600001-23650000_Seq_840_18734-18763	GCGTCGTTATGGTGCAACGTTAGCGCCTGAATTAGCTATAtgtgtgaaagggtatctgtgtgtttgtatgTAGCGCCTGAATTAGCTATATAGCGCCTGAATTAGCTATACGACACCGAACGTGCGACAA
3437_chr15:23600001-23650000_Seq_844_18814-18843	GCGTCGTTATGGTGCAACGTTAGCGCCTGAATTAGCTATAatgtttttgtgtgtggtgtgcttttgtgttTAGCGCCTGAATTAGCTATATAGCGCCTGAATTAGCTATACGACACCGAACGTGCGACAA
3440_chr15:23600001-23650000_Seq_847_18874-18903	GCGTCGTTATGGTGCAACGTTAGCGCCTGAATTAGCTATAgacggtgtgaaagggtgttatctgcatgtaTAGCGCCTGAATTAGCTATATAGCGCCTGAATTAGCTATACGACACCGAACGTGCGACAA
3442_chr15:23600001-23650000_Seq_849_18914-18943	GCGTCGTTATGGTGCAACGTTAGCGCCTGAATTAGCTATAgtgtgaatgtgtgttagtgtgttggtgtatTAGCGCCTGAATTAGCTATATAGCGCCTGAATTAGCTATACGACACCGAACGTGCGACAA
3445_chr15:23600001-23650000_Seq_852_18974-19003	GCGTCGTTATGGTGCAACGTTAGCGCCTGAATTAGCTATAactaatgtgtgtgtttctgggtaaaagtgtTAGCGCCTGAATTAGCTATATAGCGCCTGAATTAGCTATACGACACCGAACGTGCGACAA
3448_chr15:23600001-23650000_Seq_855_19043-19072	GCGTCGTTATGGTGCAACGTTAGCGCCTGAATTAGCTATAccaaagtgtatttatgtttatgtgattgtgTAGCGCCTGAATTAGCTATATAGCGCCTGAATTAGCTATACGACACCGAACGTGCGACAA
3451_chr15:23600001-23650000_Seq_858_19103-19132	GCGTCGTTATGGTGCAACGTTAGCGCCTGAATTAGCTATAgtgtggctgtgaatttttgtctgtgtgtgaTAGCGCCTGAATTAGCTATATAGCGCCTGAATTAGCTATACGACACCGAACGTGCGACAA
3454_chr15:23600001-23650000_Seq_862_19183-19212	GCGTCGTTATGGTGCAACGTTAGCGCCTGAATTAGCTATAttgtgtgtgaaagtgtgagcactttgtggtTAGCGCCTGAATTAGCTATATAGCGCCTGAATTAGCTATACGACACCGAACGTGCGACAA
3457_chr15:23600001-23650000_Seq_865_19243-19272	GCGTCGTTATGGTGCAACGTTAGCGCCTGAATTAGCTATAagtatgtaactatgtgtgtgattatgctttTAGCGCCTGAATTAGCTATATAGCGCCTGAATTAGCTATACGACACCGAACGTGCGACAA
3460_chr15:23600001-23650000_Seq_869_19325-19354	GCGTCGTTATGGTGCAACGTTAGCGCCTGAATTAGCTATAgtgtttttcatatgtacagtgaatgtgtatTAGCGCCTGAATTAGCTATATAGCGCCTGAATTAGCTATACGACACCGAACGTGCGACAA
3463_chr15:23600001-23650000_Seq_872_19385-19414	GCGTCGTTATGGTGCAACGTTAGCGCCTGAATTAGCTATAttgtgagttgtggcttatgtgtttgtgtgaTAGCGCCTGAATTAGCTATATAGCGCCTGAATTAGCTATACGACACCGAACGTGCGACAA
3466_chr15:23600001-23650000_Seq_875_19445-19474	GCGTCGTTATGGTGCAACGTTAGCGCCTGAATTAGCTATAtgtttgtatgtgaaactgtgtgcacttgtaTAGCGCCTGAATTAGCTATATAGCGCCTGAATTAGCTATACGACACCGAACGTGCGACAA
3469_chr15:23600001-23650000_Seq_878_19505-19534	GCGTCGTTATGGTGCAACGTTAGCGCCTGAATTAGCTATAtgactgtgtatctgtgtacacgtgtgagtgTAGCGCCTGAATTAGCTATATAGCGCCTGAATTAGCTATACGACACCGAACGTGCGACAA
3472_chr15:23600001-23650000_Seq_881_19565-19594	GCGTCGTTATGGTGCAACGTTAGCGCCTGAATTAGCTATAatgcatgtgtcaatatgtgtgtttgtgtttTAGCGCCTGAATTAGCTATATAGCGCCTGAATTAGCTATACGACACCGAACGTGCGACAA
3475_chr15:23600001-23650000_Seq_884_19625-19654	GCGTCGTTATGGTGCAACGTTAGCGCCTGAATTAGCTATAgtgtgcaagtgtgttcacacatgtttgtgtTAGCGCCTGAATTAGCTATATAGCGCCTGAATTAGCTATACGACACCGAACGTGCGACAA
3478_chr15:23600001-23650000_Seq_888_19705-19734	GCGTCGTTATGGTGCAACGTTAGCGCCTGAATTAGCTATAAGAAgtgagtgcgtgtgtgtgaaaaagaatTAGCGCCTGAATTAGCTATATAGCGCCTGAATTAGCTATACGACACCGAACGTGCGACAA
3481_chr15:23600001-23650000_Seq_891_19765-19794	GCGTCGTTATGGTGCAACGTTAGCGCCTGAATTAGCTATAAATTAATTCTAAATAGGGGACTGGTAGAGGTAGCGCCTGAATTAGCTATATAGCGCCTGAATTAGCTATACGACACCGAACGTGCGACAA
3484_chr15:23600001-23650000_Seq_894_19829-19858	GCGTCGTTATGGTGCAACGTTAGCGCCTGAATTAGCTATAGGGGAATTTGATAAGAGTGATATAAGAAAATAGCGCCTGAATTAGCTATATAGCGCCTGAATTAGCTATACGACACCGAACGTGCGACAA
3487_chr15:23600001-23650000_Seq_897_19889-19918	GCGTCGTTATGGTGCAACGTTAGCGCCTGAATTAGCTATAACAGATTTAGATGGTGATAGAAAGTCATGATAGCGCCTGAATTAGCTATATAGCGCCTGAATTAGCTATACGACACCGAACGTGCGACAA
3490_chr15:23600001-23650000_Seq_900_19949-19978	GCGTCGTTATGGTGCAACGTTAGCGCCTGAATTAGCTATAGAGGCACTGGGAAAACGTGATGGTAAGGAATAGCGCCTGAATTAGCTATATAGCGCCTGAATTAGCTATACGACACCGAACGTGCGACAA
3493_chr15:23600001-23650000_Seq_903_20009-20038	GCGTCGTTATGGTGCAACGTTAGCGCCTGAATTAGCTATAGGCAGTGGAAGAAAGACCTACAACAGAGAATAGCGCCTGAATTAGCTATATAGCGCCTGAATTAGCTATACGACACCGAACGTGCGACAA
3496_chr15:23600001-23650000_Seq_906_20069-20098	GCGTCGTTATGGTGCAACGTTAGCGCCTGAATTAGCTATAAGTAGATGGACAAGAAACAAGCCAAGGATGTAGCGCCTGAATTAGCTATATAGCGCCTGAATTAGCTATACGACACCGAACGTGCGACAA
3498_chr15:23600001-23650000_Seq_908_20109-20138	GCGTCGTTATGGTGCAACGTTAGCGCCTGAATTAGCTATAGTGGATGAAACCCTGCATGGGACTGAGACGTAGCGCCTGAATTAGCTATATAGCGCCTGAATTAGCTATACGACACCGAACGTGCGACAA
3501_chr15:23600001-23650000_Seq_911_20169-20198	GCGTCGTTATGGTGCAACGTTAGCGCCTGAATTAGCTATATGGTTGTGGATTTAGCTCCAAATGTGAGTGTAGCGCCTGAATTAGCTATATAGCGCCTGAATTAGCTATACGACACCGAACGTGCGACAA
3504_chr15:23600001-23650000_Seq_914_20229-20258	GCGTCGTTATGGTGCAACGTTAGCGCCTGAATTAGCTATAGTTTGTTTATTGCTTCATTCCGGACAGTATTAGCGCCTGAATTAGCTATATAGCGCCTGAATTAGCTATACGACACCGAACGTGCGACAA
3507_chr15:23600001-23650000_Seq_917_20293-20322	GCGTCGTTATGGTGCAACGTTAGCGCCTGAATTAGCTATAgcattgcatatccaggaaataatgtcacacTAGCGCCTGAATTAGCTATATAGCGCCTGAATTAGCTATACGACACCGAACGTGCGACAA
3510_chr15:23600001-23650000_Seq_920_20353-20382	GCGTCGTTATGGTGCAACGTTAGCGCCTGAATTAGCTATAagacagggagatcttgagatggcagagaagTAGCGCCTGAATTAGCTATATAGCGCCTGAATTAGCTATACGACACCGAACGTGCGACAA
3513_chr15:23600001-23650000_Seq_923_20413-20442	GCGTCGTTATGGTGCAACGTTAGCGCCTGAATTAGCTATAaggtttctggcttgaggaactggatgaggaTAGCGCCTGAATTAGCTATATAGCGCCTGAATTAGCTATACGACACCGAACGTGCGACAA
3516_chr15:23600001-23650000_Seq_926_20473-20502	GCGTCGTTATGGTGCAACGTTAGCGCCTGAATTAGCTATAacttgctaattaccttgcactccaggtcaaTAGCGCCTGAATTAGCTATATAGCGCCTGAATTAGCTATACGACACCGAACGTGCGACAA
3519_chr15:23600001-23650000_Seq_929_20553-20582	GCGTCGTTATGGTGCAACGTTAGCGCCTGAATTAGCTATAgtgagcagaagccggctaaacgaagacagtTAGCGCCTGAATTAGCTATATAGCGCCTGAATTAGCTATACGACACCGAACGTGCGACAA
3522_chr15:23600001-23650000_Seq_932_20613-20642	GCGTCGTTATGGTGCAACGTTAGCGCCTGAATTAGCTATAgtggtggggataattaagacggcaggggagTAGCGCCTGAATTAGCTATATAGCGCCTGAATTAGCTATACGACACCGAACGTGCGACAA
3525_chr15:23600001-23650000_Seq_935_20673-20702	GCGTCGTTATGGTGCAACGTTAGCGCCTGAATTAGCTATACAGAGGGTCCTTCTCCTTAGGttacaaagaTAGCGCCTGAATTAGCTATATAGCGCCTGAATTAGCTATACGACACCGAACGTGCGACAA
3528_chr15:23600001-23650000_Seq_938_20733-20762	GCGTCGTTATGGTGCAACGTTAGCGCCTGAATTAGCTATACTTTTCCACCTGGATAACTGTAAGCCTACTTAGCGCCTGAATTAGCTATATAGCGCCTGAATTAGCTATACGACACCGAACGTGCGACAA
3531_chr15:23600001-23650000_Seq_941_20793-20822	GCGTCGTTATGGTGCAACGTTAGCGCCTGAATTAGCTATAAGGCAGGCACCCTGGATACAGCATTTCAAGTAGCGCCTGAATTAGCTATATAGCGCCTGAATTAGCTATACGACACCGAACGTGCGACAA
3534_chr15:23600001-23650000_Seq_944_20853-20882	GCGTCGTTATGGTGCAACGTTAGCGCCTGAATTAGCTATACTCCATGGCTGTTGCATGGCAGGAGGCTACTAGCGCCTGAATTAGCTATATAGCGCCTGAATTAGCTATACGACACCGAACGTGCGACAA
3537_chr15:23600001-23650000_Seq_947_20913-20942	GCGTCGTTATGGTGCAACGTTAGCGCCTGAATTAGCTATATTGGTTTGTAGAGGGAAGGTGAGACATTATTAGCGCCTGAATTAGCTATATAGCGCCTGAATTAGCTATACGACACCGAACGTGCGACAA
3540_chr15:23600001-23650000_Seq_950_20974-21003	GCGTCGTTATGGTGCAACGTTAGCGCCTGAATTAGCTATAGTAACTGGCAGAACTCTACAGAAAATCGAATAGCGCCTGAATTAGCTATATAGCGCCTGAATTAGCTATACGACACCGAACGTGCGACAA
3543_chr15:23600001-23650000_Seq_953_21034-21063	GCGTCGTTATGGTGCAACGTTAGCGCCTGAATTAGCTATAAGACTGAAACGCACAACCCATAGTTTCTGTTAGCGCCTGAATTAGCTATATAGCGCCTGAATTAGCTATACGACACCGAACGTGCGACAA
3546_chr15:23600001-23650000_Seq_956_21094-21123	GCGTCGTTATGGTGCAACGTTAGCGCCTGAATTAGCTATAGATGATGAAACCATCCCATGAGACTGCCTCTAGCGCCTGAATTAGCTATATAGCGCCTGAATTAGCTATACGACACCGAACGTGCGACAA
3549_chr15:23600001-23650000_Seq_959_21154-21183	GCGTCGTTATGGTGCAACGTTAGCGCCTGAATTAGCTATATGGATATAGCATTTTGAGGGAGGTGACTGTTAGCGCCTGAATTAGCTATATAGCGCCTGAATTAGCTATACGACACCGAACGTGCGACAA
3551_chr15:23600001-23650000_Seq_961_21194-21223	GCGTCGTTATGGTGCAACGTTAGCGCCTGAATTAGCTATACAAGGCGAAGTGGGGGCAGACAAGGAGAGGTAGCGCCTGAATTAGCTATATAGCGCCTGAATTAGCTATACGACACCGAACGTGCGACAA
3554_chr15:23600001-23650000_Seq_964_21254-21283	GCGTCGTTATGGTGCAACGTTAGCGCCTGAATTAGCTATAAAGCAGTGGTCATAAGAGGTGGTATAAAAGTAGCGCCTGAATTAGCTATATAGCGCCTGAATTAGCTATACGACACCGAACGTGCGACAA
3557_chr15:23600001-23650000_Seq_967_21314-21343	GCGTCGTTATGGTGCAACGTTAGCGCCTGAATTAGCTATAACCATTCTCTCCACCAACCGCTAAATCAGCTAGCGCCTGAATTAGCTATATAGCGCCTGAATTAGCTATACGACACCGAACGTGCGACAA
3560_chr15:23600001-23650000_Seq_970_21375-21404	GCGTCGTTATGGTGCAACGTTAGCGCCTGAATTAGCTATAGGTGAAAGTGCATCCCTCCCCTTCCCTTCCTAGCGCCTGAATTAGCTATATAGCGCCTGAATTAGCTATACGACACCGAACGTGCGACAA
3563_chr15:23600001-23650000_Seq_973_21435-21464	GCGTCGTTATGGTGCAACGTTAGCGCCTGAATTAGCTATATTCTTAGAAAGAGAACTATCTATGGTTCATTAGCGCCTGAATTAGCTATATAGCGCCTGAATTAGCTATACGACACCGAACGTGCGACAA
3566_chr15:23600001-23650000_Seq_976_21495-21524	GCGTCGTTATGGTGCAACGTTAGCGCCTGAATTAGCTATACTTCGTTAAGACCATTCGCACTAGGCTGGGTAGCGCCTGAATTAGCTATATAGCGCCTGAATTAGCTATACGACACCGAACGTGCGACAA
3569_chr15:23600001-23650000_Seq_979_21555-21584	GCGTCGTTATGGTGCAACGTTAGCGCCTGAATTAGCTATAACCAATGAGTGTCAGTGTCATTTGGGGGCTTAGCGCCTGAATTAGCTATATAGCGCCTGAATTAGCTATACGACACCGAACGTGCGACAA
3572_chr15:23600001-23650000_Seq_982_21615-21644	GCGTCGTTATGGTGCAACGTTAGCGCCTGAATTAGCTATAAGTGCTCCTTTTGTCTGGTTAAAAACTCTATAGCGCCTGAATTAGCTATATAGCGCCTGAATTAGCTATACGACACCGAACGTGCGACAA
3575_chr15:23600001-23650000_Seq_985_21675-21704	GCGTCGTTATGGTGCAACGTTAGCGCCTGAATTAGCTATATTTTTGGGAGAGATAAAATAACAACCTTCTTAGCGCCTGAATTAGCTATATAGCGCCTGAATTAGCTATACGACACCGAACGTGCGACAA
3578_chr15:23600001-23650000_Seq_988_21735-21764	GCGTCGTTATGGTGCAACGTTAGCGCCTGAATTAGCTATATTTGGCCTTTGTTCATTCTAATAGCAACAGTAGCGCCTGAATTAGCTATATAGCGCCTGAATTAGCTATACGACACCGAACGTGCGACAA
3581_chr15:23600001-23650000_Seq_991_21799-21828	GCGTCGTTATGGTGCAACGTTAGCGCCTGAATTAGCTATAAACAGTACATCTGGAAACACGAAGAAATAATAGCGCCTGAATTAGCTATATAGCGCCTGAATTAGCTATACGACACCGAACGTGCGACAA
3584_chr15:23600001-23650000_Seq_994_21859-21888	GCGTCGTTATGGTGCAACGTTAGCGCCTGAATTAGCTATATGCTTGCATTCGTGTGTGTGCATACACGTGTAGCGCCTGAATTAGCTATATAGCGCCTGAATTAGCTATACGACACCGAACGTGCGACAA
3587_chr15:23600001-23650000_Seq_997_21919-21948	GCGTCGTTATGGTGCAACGTTAGCGCCTGAATTAGCTATAGTGAAAGTATGGTGCATTTAAAGAACTGCGTAGCGCCTGAATTAGCTATATAGCGCCTGAATTAGCTATACGACACCGAACGTGCGACAA
3590_chr15:23600001-23650000_Seq_1000_21979-22008	GCGTCGTTATGGTGCAACGTTAGCGCCTGAATTAGCTATAAGAAATGGGGGCGAGGAGAAGGCAGGGAAATAGCGCCTGAATTAGCTATATAGCGCCTGAATTAGCTATACGACACCGAACGTGCGACAA
3593_chr15:23600001-23650000_Seq_1003_22039-22068	GCGTCGTTATGGTGCAACGTTAGCGCCTGAATTAGCTATACAAACAGGAGAGCATGGATGAAGGCCCAGATAGCGCCTGAATTAGCTATATAGCGCCTGAATTAGCTATACGACACCGAACGTGCGACAA
3596_chr15:23600001-23650000_Seq_1006_22099-22128	GCGTCGTTATGGTGCAACGTTAGCGCCTGAATTAGCTATAAATGTCACTAAAATTGAAACTTGGCCAAATTAGCGCCTGAATTAGCTATATAGCGCCTGAATTAGCTATACGACACCGAACGTGCGACAA
3599_chr15:23600001-23650000_Seq_1009_22159-22188	GCGTCGTTATGGTGCAACGTTAGCGCCTGAATTAGCTATAGAATCACAAATCAGCAATAGTTAATCAGTTTAGCGCCTGAATTAGCTATATAGCGCCTGAATTAGCTATACGACACCGAACGTGCGACAA
3602_chr15:23600001-23650000_Seq_1012_22250-22279	GCGTCGTTATGGTGCAACGTTAGCGCCTGAATTAGCTATAGGAAGGAAGACAGAGTAATAGGTAGGTAGATAGCGCCTGAATTAGCTATATAGCGCCTGAATTAGCTATACGACACCGAACGTGCGACAA
3605_chr15:23600001-23650000_Seq_1015_22310-22339	GCGTCGTTATGGTGCAACGTTAGCGCCTGAATTAGCTATATACATGGTGAGCAAAACGACTTGATCTACGTAGCGCCTGAATTAGCTATATAGCGCCTGAATTAGCTATACGACACCGAACGTGCGACAA
3607_chr15:23600001-23650000_Seq_1017_22350-22379	GCGTCGTTATGGTGCAACGTTAGCGCCTGAATTAGCTATATTTAAGTGAAAAGTCACCTAAGGACATGAATAGCGCCTGAATTAGCTATATAGCGCCTGAATTAGCTATACGACACCGAACGTGCGACAA
3610_chr15:23600001-23650000_Seq_1020_22410-22439	GCGTCGTTATGGTGCAACGTTAGCGCCTGAATTAGCTATACTTATGTACTATGCCTTCATCCTTTGTATTTAGCGCCTGAATTAGCTATATAGCGCCTGAATTAGCTATACGACACCGAACGTGCGACAA
3613_chr15:23600001-23650000_Seq_1023_22471-22500	GCGTCGTTATGGTGCAACGTTAGCGCCTGAATTAGCTATAAACCAAAGCCTAAAGTTTATGCCTCAACTGTAGCGCCTGAATTAGCTATATAGCGCCTGAATTAGCTATACGACACCGAACGTGCGACAA
3616_chr15:23600001-23650000_Seq_1026_22531-22560	GCGTCGTTATGGTGCAACGTTAGCGCCTGAATTAGCTATAACTTCACCATCTAGGATAGACCATTTGGTGTAGCGCCTGAATTAGCTATATAGCGCCTGAATTAGCTATACGACACCGAACGTGCGACAA
3619_chr15:23600001-23650000_Seq_1029_22591-22620	GCGTCGTTATGGTGCAACGTTAGCGCCTGAATTAGCTATATTTGTGCCCCAGATCTTCAAGTTGACCATATAGCGCCTGAATTAGCTATATAGCGCCTGAATTAGCTATACGACACCGAACGTGCGACAA
3622_chr15:23600001-23650000_Seq_1032_22651-22680	GCGTCGTTATGGTGCAACGTTAGCGCCTGAATTAGCTATATATGAAACATAGATGAAGTCCCTAGAACCTTAGCGCCTGAATTAGCTATATAGCGCCTGAATTAGCTATACGACACCGAACGTGCGACAA
3625_chr15:23600001-23650000_Seq_1035_22711-22740	GCGTCGTTATGGTGCAACGTTAGCGCCTGAATTAGCTATAAGAGTCAGGCATCAAAGCCTGTACATTTTCTAGCGCCTGAATTAGCTATATAGCGCCTGAATTAGCTATACGACACCGAACGTGCGACAA
3628_chr15:23600001-23650000_Seq_1038_22792-22821	GCGTCGTTATGGTGCAACGTTAGCGCCTGAATTAGCTATAcctgacttatagtaagttctcaataaaatgTAGCGCCTGAATTAGCTATATAGCGCCTGAATTAGCTATACGACACCGAACGTGCGACAA
3631_chr15:23600001-23650000_Seq_1041_22852-22881	GCGTCGTTATGGTGCAACGTTAGCGCCTGAATTAGCTATAatgatggcaaaagtagtgtctcctttcctcTAGCGCCTGAATTAGCTATATAGCGCCTGAATTAGCTATACGACACCGAACGTGCGACAA
3634_chr15:23600001-23650000_Seq_1044_22912-22941	GCGTCGTTATGGTGCAACGTTAGCGCCTGAATTAGCTATAtgccataactgttggagttctctgatatgtTAGCGCCTGAATTAGCTATATAGCGCCTGAATTAGCTATACGACACCGAACGTGCGACAA
3637_chr15:23600001-23650000_Seq_1049_23043-23072	GCGTCGTTATGGTGCAACGTTAGCGCCTGAATTAGCTATAtacacataatttacccattcaacaaacctgTAGCGCCTGAATTAGCTATATAGCGCCTGAATTAGCTATACGACACCGAACGTGCGACAA
3640_chr15:23600001-23650000_Seq_1055_23163-23192	GCGTCGTTATGGTGCAACGTTAGCGCCTGAATTAGCTATAatagacatcaggacccacttaaaagtggagTAGCGCCTGAATTAGCTATATAGCGCCTGAATTAGCTATACGACACCGAACGTGCGACAA
3643_chr15:23600001-23650000_Seq_1068_23459-23488	GCGTCGTTATGGTGCAACGTTAGCGCCTGAATTAGCTATAttttaccataaaggcatatgcatgtgtatgTAGCGCCTGAATTAGCTATATAGCGCCTGAATTAGCTATACGACACCGAACGTGCGACAA
3646_chr15:23600001-23650000_Seq_1082_23819-23848	GCGTCGTTATGGTGCAACGTTAGCGCCTGAATTAGCTATAcatttaaaaatgctgaaagaacatgaacagTAGCGCCTGAATTAGCTATATAGCGCCTGAATTAGCTATACGACACCGAACGTGCGACAA
3649_chr15:23600001-23650000_Seq_1087_23971-24000	GCGTCGTTATGGTGCAACGTTAGCGCCTGAATTAGCTATAagatcaacagaacaggttagggaatccagaTAGCGCCTGAATTAGCTATATAGCGCCTGAATTAGCTATACGACACCGAACGTGCGACAA
3652_chr15:23600001-23650000_Seq_1102_24326-24355	GCGTCGTTATGGTGCAACGTTAGCGCCTGAATTAGCTATAgtgaaagacctttacaacacgaattaaaaaTAGCGCCTGAATTAGCTATATAGCGCCTGAATTAGCTATACGACACCGAACGTGCGACAA
3655_chr15:23600001-23650000_Seq_1107_24502-24531	GCGTCGTTATGGTGCAACGTTAGCGCCTGAATTAGCTATActaggtctcataaacaacttaaacaaagttTAGCGCCTGAATTAGCTATATAGCGCCTGAATTAGCTATACGACACCGAACGTGCGACAA
3658_chr15:23600001-23650000_Seq_1110_24562-24591	GCGTCGTTATGGTGCAACGTTAGCGCCTGAATTAGCTATAtcttcacagattgtatgattctatacctaaTAGCGCCTGAATTAGCTATATAGCGCCTGAATTAGCTATACGACACCGAACGTGCGACAA
3660_chr15:23600001-23650000_Seq_1113_24622-24651	GCGTCGTTATGGTGCAACGTTAGCGCCTGAATTAGCTATAatgaggaaagagaaagcaataaaaggctccTAGCGCCTGAATTAGCTATATAGCGCCTGAATTAGCTATACGACACCGAACGTGCGACAA
3663_chr15:23600001-23650000_Seq_1125_24864-24893	GCGTCGTTATGGTGCAACGTTAGCGCCTGAATTAGCTATAcaacagatgtagaaaagactctcactaaaaTAGCGCCTGAATTAGCTATATAGCGCCTGAATTAGCTATACGACACCGAACGTGCGACAA
3666_chr15:23600001-23650000_Seq_1128_24965-24994	GCGTCGTTATGGTGCAACGTTAGCGCCTGAATTAGCTATAaggctttattcttggggtgccaagttggttTAGCGCCTGAATTAGCTATATAGCGCCTGAATTAGCTATACGACACCGAACGTGCGACAA
3669_chr15:23600001-23650000_Seq_1139_25215-25244	GCGTCGTTATGGTGCAACGTTAGCGCCTGAATTAGCTATAcagacatataaagagattcagtagtatcaaTAGCGCCTGAATTAGCTATATAGCGCCTGAATTAGCTATACGACACCGAACGTGCGACAA
3672_chr15:23600001-23650000_Seq_1144_25360-25389	GCGTCGTTATGGTGCAACGTTAGCGCCTGAATTAGCTATAggaaatggttaaattcctggaattgaatctTAGCGCCTGAATTAGCTATATAGCGCCTGAATTAGCTATACGACACCGAACGTGCGACAA
3675_chr15:23600001-23650000_Seq_1149_25460-25489	GCGTCGTTATGGTGCAACGTTAGCGCCTGAATTAGCTATAgaaatgacaaagaggacattactactaatcTAGCGCCTGAATTAGCTATATAGCGCCTGAATTAGCTATACGACACCGAACGTGCGACAA
3678_chr15:23600001-23650000_Seq_1153_25556-25585	GCGTCGTTATGGTGCAACGTTAGCGCCTGAATTAGCTATAcaaagaaaccaaaagcatgttcgttaaaatTAGCGCCTGAATTAGCTATATAGCGCCTGAATTAGCTATACGACACCGAACGTGCGACAA
3681_chr15:23600001-23650000_Seq_1157_25645-25674	GCGTCGTTATGGTGCAACGTTAGCGCCTGAATTAGCTATAtgatgacaagggtaacagaagaaaataaatTAGCGCCTGAATTAGCTATATAGCGCCTGAATTAGCTATACGACACCGAACGTGCGACAA
3684_chr15:23600001-23650000_Seq_1161_25745-25774	GCGTCGTTATGGTGCAACGTTAGCGCCTGAATTAGCTATAgaaagtttacagcattaaatgactacatgtTAGCGCCTGAATTAGCTATATAGCGCCTGAATTAGCTATACGACACCGAACGTGCGACAA
3687_chr15:23600001-23650000_Seq_1171_26020-26049	GCGTCGTTATGGTGCAACGTTAGCGCCTGAATTAGCTATAtaatcactcacacactcagccacaaagcaaTAGCGCCTGAATTAGCTATATAGCGCCTGAATTAGCTATACGACACCGAACGTGCGACAA
3690_chr15:23600001-23650000_Seq_1175_26102-26131	GCGTCGTTATGGTGCAACGTTAGCGCCTGAATTAGCTATAactcgacacttggccaaatagacctaacatTAGCGCCTGAATTAGCTATATAGCGCCTGAATTAGCTATACGACACCGAACGTGCGACAA
3693_chr15:23600001-23650000_Seq_1178_26162-26191	GCGTCGTTATGGTGCAACGTTAGCGCCTGAATTAGCTATAactgacagtattagatagattatagaagcaTAGCGCCTGAATTAGCTATATAGCGCCTGAATTAGCTATACGACACCGAACGTGCGACAA
3696_chr15:23600001-23650000_Seq_1182_26262-26291	GCGTCGTTATGGTGCAACGTTAGCGCCTGAATTAGCTATAcaaccaacactggaacatccagattaaaaaTAGCGCCTGAATTAGCTATATAGCGCCTGAATTAGCTATACGACACCGAACGTGCGACAA
3699_chr15:23600001-23650000_Seq_1187_26371-26400	GCGTCGTTATGGTGCAACGTTAGCGCCTGAATTAGCTATAgataaaacagtctttaaaacagcaatgatcTAGCGCCTGAATTAGCTATATAGCGCCTGAATTAGCTATACGACACCGAACGTGCGACAA
3702_chr15:23600001-23650000_Seq_1191_26477-26506	GCGTCGTTATGGTGCAACGTTAGCGCCTGAATTAGCTATACAGTTTAGAATGACTCTTATAGAAAGTAGATAGCGCCTGAATTAGCTATATAGCGCCTGAATTAGCTATACGACACCGAACGTGCGACAA
3705_chr15:23600001-23650000_Seq_1194_26537-26566	GCGTCGTTATGGTGCAACGTTAGCGCCTGAATTAGCTATACAAGGGTGAGTTATTTGAATACAGTGGGAGTAGCGCCTGAATTAGCTATATAGCGCCTGAATTAGCTATACGACACCGAACGTGCGACAA
3708_chr15:23600001-23650000_Seq_1197_26597-26626	GCGTCGTTATGGTGCAACGTTAGCGCCTGAATTAGCTATATTATCTGTCCTTCCTTGTTTGTATCCAATGTAGCGCCTGAATTAGCTATATAGCGCCTGAATTAGCTATACGACACCGAACGTGCGACAA
3711_chr15:23600001-23650000_Seq_1200_26657-26686	GCGTCGTTATGGTGCAACGTTAGCGCCTGAATTAGCTATAGTTTCTCCTGGAACTTTCTCTTGGGAGAAGTAGCGCCTGAATTAGCTATATAGCGCCTGAATTAGCTATACGACACCGAACGTGCGACAA
3714_chr15:23600001-23650000_Seq_1203_26718-26747	GCGTCGTTATGGTGCAACGTTAGCGCCTGAATTAGCTATAGGATGTTCTTTTACAGCACAAATCATTTTTTAGCGCCTGAATTAGCTATATAGCGCCTGAATTAGCTATACGACACCGAACGTGCGACAA
3716_chr15:23600001-23650000_Seq_1205_26758-26787	GCGTCGTTATGGTGCAACGTTAGCGCCTGAATTAGCTATAGAGGTGAGGTTAAAGCTGAGGTTGATGGTATAGCGCCTGAATTAGCTATATAGCGCCTGAATTAGCTATACGACACCGAACGTGCGACAA
3719_chr15:23600001-23650000_Seq_1208_26818-26847	GCGTCGTTATGGTGCAACGTTAGCGCCTGAATTAGCTATAAAGAGGTGAAGAGAACATGCTGATGGAAGATAGCGCCTGAATTAGCTATATAGCGCCTGAATTAGCTATACGACACCGAACGTGCGACAA
3722_chr15:23600001-23650000_Seq_1211_26881-26910	GCGTCGTTATGGTGCAACGTTAGCGCCTGAATTAGCTATAGGAAAAGACAGTGAAAAGAAATATTCTGTTTAGCGCCTGAATTAGCTATATAGCGCCTGAATTAGCTATACGACACCGAACGTGCGACAA
3725_chr15:23600001-23650000_Seq_1214_26941-26970	GCGTCGTTATGGTGCAACGTTAGCGCCTGAATTAGCTATAGAGTCACCTACTTTGAAGGAGCAACCAGAATAGCGCCTGAATTAGCTATATAGCGCCTGAATTAGCTATACGACACCGAACGTGCGACAA
3728_chr15:23600001-23650000_Seq_1217_27001-27030	GCGTCGTTATGGTGCAACGTTAGCGCCTGAATTAGCTATATCACATTTTTCCTCTCCCTCTTCCCATGTGTAGCGCCTGAATTAGCTATATAGCGCCTGAATTAGCTATACGACACCGAACGTGCGACAA
3731_chr15:23600001-23650000_Seq_1220_27064-27093	GCGTCGTTATGGTGCAACGTTAGCGCCTGAATTAGCTATATCAATACTGAACCAAGAAAGGACATGTGGCTAGCGCCTGAATTAGCTATATAGCGCCTGAATTAGCTATACGACACCGAACGTGCGACAA
3734_chr15:23600001-23650000_Seq_1223_27124-27153	GCGTCGTTATGGTGCAACGTTAGCGCCTGAATTAGCTATATTTCAGGTAAGATGGGATAGAAATGGAGTCTAGCGCCTGAATTAGCTATATAGCGCCTGAATTAGCTATACGACACCGAACGTGCGACAA
3737_chr15:23600001-23650000_Seq_1226_27184-27213	GCGTCGTTATGGTGCAACGTTAGCGCCTGAATTAGCTATACAAGTGGGAATTAGTATTCCAGAAGAGCAATAGCGCCTGAATTAGCTATATAGCGCCTGAATTAGCTATACGACACCGAACGTGCGACAA
3740_chr15:23600001-23650000_Seq_1229_27244-27273	GCGTCGTTATGGTGCAACGTTAGCGCCTGAATTAGCTATAccgttatggactcacaggaattacggaatcTAGCGCCTGAATTAGCTATATAGCGCCTGAATTAGCTATACGACACCGAACGTGCGACAA
3743_chr15:23600001-23650000_Seq_1232_27322-27351	GCGTCGTTATGGTGCAACGTTAGCGCCTGAATTAGCTATAtttcaaacagccaatagggggaagcaaaaaTAGCGCCTGAATTAGCTATATAGCGCCTGAATTAGCTATACGACACCGAACGTGCGACAA
3746_chr15:23600001-23650000_Seq_1235_27387-27416	GCGTCGTTATGGTGCAACGTTAGCGCCTGAATTAGCTATAtctccaccaagttctgccgtggtttgtcaaTAGCGCCTGAATTAGCTATATAGCGCCTGAATTAGCTATACGACACCGAACGTGCGACAA
3749_chr15:23600001-23650000_Seq_1238_27447-27476	GCGTCGTTATGGTGCAACGTTAGCGCCTGAATTAGCTATAaaattcacctacgtattgaatccagctcaaTAGCGCCTGAATTAGCTATATAGCGCCTGAATTAGCTATACGACACCGAACGTGCGACAA
3752_chr15:23600001-23650000_Seq_1241_27516-27545	GCGTCGTTATGGTGCAACGTTAGCGCCTGAATTAGCTATAgtttatcaaatatccactttacacttccttTAGCGCCTGAATTAGCTATATAGCGCCTGAATTAGCTATACGACACCGAACGTGCGACAA
3755_chr15:23600001-23650000_Seq_1244_27576-27605	GCGTCGTTATGGTGCAACGTTAGCGCCTGAATTAGCTATAccaagagaaaacaggatttgatgCGATCACTAGCGCCTGAATTAGCTATATAGCGCCTGAATTAGCTATACGACACCGAACGTGCGACAA
3758_chr15:23600001-23650000_Seq_1247_27636-27665	GCGTCGTTATGGTGCAACGTTAGCGCCTGAATTAGCTATAtcagtcacatgacctcaactaactgcagctTAGCGCCTGAATTAGCTATATAGCGCCTGAATTAGCTATACGACACCGAACGTGCGACAA
3761_chr15:23600001-23650000_Seq_1250_27696-27725	GCGTCGTTATGGTGCAACGTTAGCGCCTGAATTAGCTATAgatttttataaactgtatttgggagtggagTAGCGCCTGAATTAGCTATATAGCGCCTGAATTAGCTATACGACACCGAACGTGCGACAA
3764_chr15:23600001-23650000_Seq_1253_27756-27785	GCGTCGTTATGGTGCAACGTTAGCGCCTGAATTAGCTATAtcagaatccatgccgttcacctgtcagagaTAGCGCCTGAATTAGCTATATAGCGCCTGAATTAGCTATACGACACCGAACGTGCGACAA
3767_chr15:23600001-23650000_Seq_1353_30144-30173	GCGTCGTTATGGTGCAACGTTAGCGCCTGAATTAGCTATAatcccatattttcctctaagagttttgtacTAGCGCCTGAATTAGCTATATAGCGCCTGAATTAGCTATACGACACCGAACGTGCGACAA
3769_chr15:23600001-23650000_Seq_1355_30206-30235	GCGTCGTTATGGTGCAACGTTAGCGCCTGAATTAGCTATAtttgagtcactttttgtgtaagatgtgagaTAGCGCCTGAATTAGCTATATAGCGCCTGAATTAGCTATACGACACCGAACGTGCGACAA
3772_chr15:23600001-23650000_Seq_1358_30266-30295	GCGTCGTTATGGTGCAACGTTAGCGCCTGAATTAGCTATAacatccaatttttccaccatcatttgttaaTAGCGCCTGAATTAGCTATATAGCGCCTGAATTAGCTATACGACACCGAACGTGCGACAA
3775_chr15:23600001-23650000_Seq_1362_30364-30393	GCGTCGTTATGGTGCAACGTTAGCGCCTGAATTAGCTATAcattcattaatgagttttctattctactccTAGCGCCTGAATTAGCTATATAGCGCCTGAATTAGCTATACGACACCGAACGTGCGACAA
3778_chr15:23600001-23650000_Seq_1365_30424-30453	GCGTCGTTATGGTGCAACGTTAGCGCCTGAATTAGCTATAgtcatgcggtcttgattttagagggaaagcTAGCGCCTGAATTAGCTATATAGCGCCTGAATTAGCTATACGACACCGAACGTGCGACAA
3781_chr15:23600001-23650000_Seq_1368_30500-30529	GCGTCGTTATGGTGCAACGTTAGCGCCTGAATTAGCTATAtataaaccctttattaggttaaggaagatcTAGCGCCTGAATTAGCTATATAGCGCCTGAATTAGCTATACGACACCGAACGTGCGACAA
3784_chr15:23600001-23650000_Seq_1372_30657-30686	GCGTCGTTATGGTGCAACGTTAGCGCCTGAATTAGCTATAacatcagtatttataaatgttgaatcagccTAGCGCCTGAATTAGCTATATAGCGCCTGAATTAGCTATACGACACCGAACGTGCGACAA
3787_chr15:23600001-23650000_Seq_1375_30718-30747	GCGTCGTTATGGTGCAACGTTAGCGCCTGAATTAGCTATAcattatattgttcctcttatatattgctggTAGCGCCTGAATTAGCTATATAGCGCCTGAATTAGCTATACGACACCGAACGTGCGACAA
3790_chr15:23600001-23650000_Seq_1378_30783-30812	GCGTCGTTATGGTGCAACGTTAGCGCCTGAATTAGCTATAtctcaattaatcagaggtatttctccatagTAGCGCCTGAATTAGCTATATAGCGCCTGAATTAGCTATACGACACCGAACGTGCGACAA
3793_chr15:23600001-23650000_Seq_1383_30903-30932	GCGTCGTTATGGTGCAACGTTAGCGCCTGAATTAGCTATAataaaatgagttaagcagtattccaacctcTAGCGCCTGAATTAGCTATATAGCGCCTGAATTAGCTATACGACACCGAACGTGCGACAA
3796_chr15:23600001-23650000_Seq_1400_31330-31359	GCGTCGTTATGGTGCAACGTTAGCGCCTGAATTAGCTATAtggtgttttaggtagctatttctccttgagTAGCGCCTGAATTAGCTATATAGCGCCTGAATTAGCTATACGACACCGAACGTGCGACAA
3799_chr15:23600001-23650000_Seq_1403_31390-31419	GCGTCGTTATGGTGCAACGTTAGCGCCTGAATTAGCTATAattgcctcatttcatctaggtcatcaagttTAGCGCCTGAATTAGCTATATAGCGCCTGAATTAGCTATACGACACCGAACGTGCGACAA
3802_chr15:23600001-23650000_Seq_1406_31450-31479	GCGTCGTTATGGTGCAACGTTAGCGCCTGAATTAGCTATAACTGGGTGCACTTCCCTCCCCCAAGATGGGTAGCGCCTGAATTAGCTATATAGCGCCTGAATTAGCTATACGACACCGAACGTGCGACAA
3805_chr15:23600001-23650000_Seq_1409_31510-31539	GCGTCGTTATGGTGCAACGTTAGCGCCTGAATTAGCTATAGCTCTTAGGGCTTCCTCCAGCCTAGGGTGCTAGCGCCTGAATTAGCTATATAGCGCCTGAATTAGCTATACGACACCGAACGTGCGACAA
3808_chr15:23600001-23650000_Seq_1412_31570-31599	GCGTCGTTATGGTGCAACGTTAGCGCCTGAATTAGCTATAtgtatctccctggagtaaccttctctctggTAGCGCCTGAATTAGCTATATAGCGCCTGAATTAGCTATACGACACCGAACGTGCGACAA
3811_chr15:23600001-23650000_Seq_1415_31651-31680	GCGTCGTTATGGTGCAACGTTAGCGCCTGAATTAGCTATAaaaaatcCTGTGTGCATGCTTACACCTGCTTAGCGCCTGAATTAGCTATATAGCGCCTGAATTAGCTATACGACACCGAACGTGCGACAA
3814_chr15:23600001-23650000_Seq_1418_31711-31740	GCGTCGTTATGGTGCAACGTTAGCGCCTGAATTAGCTATACATGTAAGAAAACAAGGGCTGAAAGTAAATTAGCGCCTGAATTAGCTATATAGCGCCTGAATTAGCTATACGACACCGAACGTGCGACAA
3817_chr15:23600001-23650000_Seq_1421_31775-31804	GCGTCGTTATGGTGCAACGTTAGCGCCTGAATTAGCTATATTATGGTCGTTGGTTATTGTAATATGTTTCTAGCGCCTGAATTAGCTATATAGCGCCTGAATTAGCTATACGACACCGAACGTGCGACAA
3820_chr15:23600001-23650000_Seq_1424_31849-31878	GCGTCGTTATGGTGCAACGTTAGCGCCTGAATTAGCTATAGACTAGGGAGATGAGGTATTCCATCTCATGTAGCGCCTGAATTAGCTATATAGCGCCTGAATTAGCTATACGACACCGAACGTGCGACAA
3823_chr15:23600001-23650000_Seq_1427_31909-31938	GCGTCGTTATGGTGCAACGTTAGCGCCTGAATTAGCTATAGCACCCACCTGACCTGGGGACTCTACCAAATAGCGCCTGAATTAGCTATATAGCGCCTGAATTAGCTATACGACACCGAACGTGCGACAA
3825_chr15:23600001-23650000_Seq_1429_31949-31978	GCGTCGTTATGGTGCAACGTTAGCGCCTGAATTAGCTATAGCGGTGCTGGTGCATGAAACCAGGAATCTATAGCGCCTGAATTAGCTATATAGCGCCTGAATTAGCTATACGACACCGAACGTGCGACAA
3828_chr15:23600001-23650000_Seq_1432_32009-32038	GCGTCGTTATGGTGCAACGTTAGCGCCTGAATTAGCTATATTGCCCAAATCAGACTGCGGAATGCTTGGGTAGCGCCTGAATTAGCTATATAGCGCCTGAATTAGCTATACGACACCGAACGTGCGACAA
3831_chr15:23600001-23650000_Seq_1435_32073-32102	GCGTCGTTATGGTGCAACGTTAGCGCCTGAATTAGCTATACAACCCAACTAAAATTACTTTTTAAATGCCTAGCGCCTGAATTAGCTATATAGCGCCTGAATTAGCTATACGACACCGAACGTGCGACAA
3834_chr15:23600001-23650000_Seq_1438_32133-32162	GCGTCGTTATGGTGCAACGTTAGCGCCTGAATTAGCTATATACAGTGGCTCAACCGGATCACTGAAGCCATAGCGCCTGAATTAGCTATATAGCGCCTGAATTAGCTATACGACACCGAACGTGCGACAA
3837_chr15:23600001-23650000_Seq_1441_32193-32222	GCGTCGTTATGGTGCAACGTTAGCGCCTGAATTAGCTATATTTGGTGATGTTTCTTTCACGACTGTGTGCTAGCGCCTGAATTAGCTATATAGCGCCTGAATTAGCTATACGACACCGAACGTGCGACAA
3840_chr15:23600001-23650000_Seq_1444_32253-32282	GCGTCGTTATGGTGCAACGTTAGCGCCTGAATTAGCTATAGATATTAGAGCGTCAGTGCTGAAGACAAACTAGCGCCTGAATTAGCTATATAGCGCCTGAATTAGCTATACGACACCGAACGTGCGACAA
3843_chr15:23600001-23650000_Seq_1449_32368-32397	GCGTCGTTATGGTGCAACGTTAGCGCCTGAATTAGCTATActcgctgcaacctccgcctttcaggttcaaTAGCGCCTGAATTAGCTATATAGCGCCTGAATTAGCTATACGACACCGAACGTGCGACAA
3846_chr15:23600001-23650000_Seq_1459_32587-32616	GCGTCGTTATGGTGCAACGTTAGCGCCTGAATTAGCTATAgccaccatgcctggccGTCTCTTTTTAAAATAGCGCCTGAATTAGCTATATAGCGCCTGAATTAGCTATACGACACCGAACGTGCGACAA
3849_chr15:23600001-23650000_Seq_1462_32656-32685	GCGTCGTTATGGTGCAACGTTAGCGCCTGAATTAGCTATACCGACTAGATTTTGCCACATGTGCATGAATTAGCGCCTGAATTAGCTATATAGCGCCTGAATTAGCTATACGACACCGAACGTGCGACAA
3852_chr15:23600001-23650000_Seq_1465_32716-32745	GCGTCGTTATGGTGCAACGTTAGCGCCTGAATTAGCTATAAGCTGACCCTGGATGAAGGAAGGGATTTATTAGCGCCTGAATTAGCTATATAGCGCCTGAATTAGCTATACGACACCGAACGTGCGACAA
3855_chr15:23600001-23650000_Seq_1468_32791-32820	GCGTCGTTATGGTGCAACGTTAGCGCCTGAATTAGCTATATCTATCAGCAAAGAAGGAGACTGGATCAAGTAGCGCCTGAATTAGCTATATAGCGCCTGAATTAGCTATACGACACCGAACGTGCGACAA
3858_chr15:23600001-23650000_Seq_1472_32906-32935	GCGTCGTTATGGTGCAACGTTAGCGCCTGAATTAGCTATAtctattgcccagacgggagtacagcggcgtTAGCGCCTGAATTAGCTATATAGCGCCTGAATTAGCTATACGACACCGAACGTGCGACAA
3861_chr15:23600001-23650000_Seq_1478_33026-33055	GCGTCGTTATGGTGCAACGTTAGCGCCTGAATTAGCTATActtgtcaccacactgggctaatttttgtacTAGCGCCTGAATTAGCTATATAGCGCCTGAATTAGCTATACGACACCGAACGTGCGACAA
3864_chr15:23600001-23650000_Seq_1487_33207-33236	GCGTCGTTATGGTGCAACGTTAGCGCCTGAATTAGCTATAGGAAGGATGGAGTTGGATTCTGCCTAAATGTAGCGCCTGAATTAGCTATATAGCGCCTGAATTAGCTATACGACACCGAACGTGCGACAA
3867_chr15:23600001-23650000_Seq_1490_33315-33344	GCGTCGTTATGGTGCAACGTTAGCGCCTGAATTAGCTATATTATCCAATATCTGCATGGAATATTTTTCCTAGCGCCTGAATTAGCTATATAGCGCCTGAATTAGCTATACGACACCGAACGTGCGACAA
3870_chr15:23600001-23650000_Seq_1493_33375-33404	GCGTCGTTATGGTGCAACGTTAGCGCCTGAATTAGCTATATTTCCAATTCAATTGTGAATTGGAGAATAGTAGCGCCTGAATTAGCTATATAGCGCCTGAATTAGCTATACGACACCGAACGTGCGACAA
3873_chr15:23600001-23650000_Seq_1496_33435-33464	GCGTCGTTATGGTGCAACGTTAGCGCCTGAATTAGCTATAAAAAGCCTAAGTAATGATAATAGCTGTCATTAGCGCCTGAATTAGCTATATAGCGCCTGAATTAGCTATACGACACCGAACGTGCGACAA
3876_chr15:23600001-23650000_Seq_1499_33495-33524	GCGTCGTTATGGTGCAACGTTAGCGCCTGAATTAGCTATAAGATTAAGCTCAGTAGAAAAGGCGTCAGGTTAGCGCCTGAATTAGCTATATAGCGCCTGAATTAGCTATACGACACCGAACGTGCGACAA
3878_chr15:23600001-23650000_Seq_1501_33535-33564	GCGTCGTTATGGTGCAACGTTAGCGCCTGAATTAGCTATAGATAATGGGCATTTTGTAGGCAGATTTTGGTAGCGCCTGAATTAGCTATATAGCGCCTGAATTAGCTATACGACACCGAACGTGCGACAA
3881_chr15:23600001-23650000_Seq_1515_33883-33912	GCGTCGTTATGGTGCAACGTTAGCGCCTGAATTAGCTATAATTTTTACACCTGCTGCCTTATCCTAGCCTTAGCGCCTGAATTAGCTATATAGCGCCTGAATTAGCTATACGACACCGAACGTGCGACAA
3884_chr15:23600001-23650000_Seq_1518_33943-33972	GCGTCGTTATGGTGCAACGTTAGCGCCTGAATTAGCTATACACACTTAAAATTGTCTTCTTCCCAATCCATAGCGCCTGAATTAGCTATATAGCGCCTGAATTAGCTATACGACACCGAACGTGCGACAA
3887_chr15:23600001-23650000_Seq_1521_34003-34032	GCGTCGTTATGGTGCAACGTTAGCGCCTGAATTAGCTATAaaaggcccctgaataacctgcaatcactagTAGCGCCTGAATTAGCTATATAGCGCCTGAATTAGCTATACGACACCGAACGTGCGACAA
3890_chr15:23600001-23650000_Seq_1524_34063-34092	GCGTCGTTATGGTGCAACGTTAGCGCCTGAATTAGCTATAagacagaaaactttcggaggctagtttcccTAGCGCCTGAATTAGCTATATAGCGCCTGAATTAGCTATACGACACCGAACGTGCGACAA
3893_chr15:23600001-23650000_Seq_1527_34125-34154	GCGTCGTTATGGTGCAACGTTAGCGCCTGAATTAGCTATAggccccaccctcgacccactcagcaggacaTAGCGCCTGAATTAGCTATATAGCGCCTGAATTAGCTATACGACACCGAACGTGCGACAA
3896_chr15:23600001-23650000_Seq_1530_34185-34214	GCGTCGTTATGGTGCAACGTTAGCGCCTGAATTAGCTATAtggtgatactgaggtagccctcccctgctgTAGCGCCTGAATTAGCTATATAGCGCCTGAATTAGCTATACGACACCGAACGTGCGACAA
3899_chr15:23600001-23650000_Seq_1533_34245-34274	GCGTCGTTATGGTGCAACGTTAGCGCCTGAATTAGCTATAcgacgttcaccaggcagtaacaagctgccaTAGCGCCTGAATTAGCTATATAGCGCCTGAATTAGCTATACGACACCGAACGTGCGACAA
3902_chr15:23600001-23650000_Seq_1536_34305-34334	GCGTCGTTATGGTGCAACGTTAGCGCCTGAATTAGCTATAagcttgaacttttaccttcctgcaccttccTAGCGCCTGAATTAGCTATATAGCGCCTGAATTAGCTATACGACACCGAACGTGCGACAA
3905_chr15:23600001-23650000_Seq_1539_34365-34394	GCGTCGTTATGGTGCAACGTTAGCGCCTGAATTAGCTATAgagaagccttcccatgctaatgaggcctccTAGCGCCTGAATTAGCTATATAGCGCCTGAATTAGCTATACGACACCGAACGTGCGACAA
3908_chr15:23600001-23650000_Seq_1542_34425-34454	GCGTCGTTATGGTGCAACGTTAGCGCCTGAATTAGCTATAgcgagcaatgaaaaggggcctcttcccctcTAGCGCCTGAATTAGCTATATAGCGCCTGAATTAGCTATACGACACCGAACGTGCGACAA
3911_chr15:23600001-23650000_Seq_1545_34485-34514	GCGTCGTTATGGTGCAACGTTAGCGCCTGAATTAGCTATAgcagaagctgaacttttaccccagctctgtTAGCGCCTGAATTAGCTATATAGCGCCTGAATTAGCTATACGACACCGAACGTGCGACAA
3914_chr15:23600001-23650000_Seq_1548_34545-34574	GCGTCGTTATGGTGCAACGTTAGCGCCTGAATTAGCTATAtgtccatggagaccacctgggggtcccggaTAGCGCCTGAATTAGCTATATAGCGCCTGAATTAGCTATACGACACCGAACGTGCGACAA
3917_chr15:23600001-23650000_Seq_1551_34605-34634	GCGTCGTTATGGTGCAACGTTAGCGCCTGAATTAGCTATAgggtccttatttcccactcatacagtctctTAGCGCCTGAATTAGCTATATAGCGCCTGAATTAGCTATACGACACCGAACGTGCGACAA
3920_chr15:23600001-23650000_Seq_1555_34706-34735	GCGTCGTTATGGTGCAACGTTAGCGCCTGAATTAGCTATAtttaggatacaataaaaagtcactcttcacTAGCGCCTGAATTAGCTATATAGCGCCTGAATTAGCTATACGACACCGAACGTGCGACAA
3923_chr15:23600001-23650000_Seq_1558_34766-34795	GCGTCGTTATGGTGCAACGTTAGCGCCTGAATTAGCTATAgagaaacgaaagtcatcagaaacaaatgctTAGCGCCTGAATTAGCTATATAGCGCCTGAATTAGCTATACGACACCGAACGTGCGACAA
3926_chr15:23600001-23650000_Seq_1561_34827-34856	GCGTCGTTATGGTGCAACGTTAGCGCCTGAATTAGCTATATATACACATGctttccgaagaacagaaatcTAGCGCCTGAATTAGCTATATAGCGCCTGAATTAGCTATACGACACCGAACGTGCGACAA
3929_chr15:23600001-23650000_Seq_1566_34927-34956	GCGTCGTTATGGTGCAACGTTAGCGCCTGAATTAGCTATAaatctctttcagaaaacagaaaagaagggaTAGCGCCTGAATTAGCTATATAGCGCCTGAATTAGCTATACGACACCGAACGTGCGACAA
3932_chr15:23600001-23650000_Seq_1569_35038-35067	GCGTCGTTATGGTGCAACGTTAGCGCCTGAATTAGCTATAcattcttcatgaatatggatgtaaaaatccTAGCGCCTGAATTAGCTATATAGCGCCTGAATTAGCTATACGACACCGAACGTGCGACAA
3934_chr15:23600001-23650000_Seq_1571_35139-35168	GCGTCGTTATGGTGCAACGTTAGCGCCTGAATTAGCTATAaatagaaggctgattcaatgctaaaagataTAGCGCCTGAATTAGCTATATAGCGCCTGAATTAGCTATACGACACCGAACGTGCGACAA
3937_chr15:23600001-23650000_Seq_1574_35230-35259	GCGTCGTTATGGTGCAACGTTAGCGCCTGAATTAGCTATAcaatgcagaaaatacatttgacaaaacttcTAGCGCCTGAATTAGCTATATAGCGCCTGAATTAGCTATACGACACCGAACGTGCGACAA
3940_chr15:23600001-23650000_Seq_1577_35308-35337	GCGTCGTTATGGTGCAACGTTAGCGCCTGAATTAGCTATAagaagggaacttcctcaacttgatatagggTAGCGCCTGAATTAGCTATATAGCGCCTGAATTAGCTATACGACACCGAACGTGCGACAA
3943_chr15:23600001-23650000_Seq_1581_35399-35428	GCGTCGTTATGGTGCAACGTTAGCGCCTGAATTAGCTATActaacgtcaggagcaaggaattcatatctgTAGCGCCTGAATTAGCTATATAGCGCCTGAATTAGCTATACGACACCGAACGTGCGACAA
3946_chr15:23600001-23650000_Seq_1586_35519-35548	GCGTCGTTATGGTGCAACGTTAGCGCCTGAATTAGCTATAtaaaactgtctctatttgtagacgacacaaTAGCGCCTGAATTAGCTATATAGCGCCTGAATTAGCTATACGACACCGAACGTGCGACAA
3949_chr15:23600001-23650000_Seq_1603_35924-35953	GCGTCGTTATGGTGCAACGTTAGCGCCTGAATTAGCTATAaatggtctgcaaagaaaatcccaaaggataTAGCGCCTGAATTAGCTATATAGCGCCTGAATTAGCTATACGACACCGAACGTGCGACAA
3952_chr15:23600001-23650000_Seq_1607_36004-36033	GCGTCGTTATGGTGCAACGTTAGCGCCTGAATTAGCTATAagatcaacatacaaaactcaaccattttgaTAGCGCCTGAATTAGCTATATAGCGCCTGAATTAGCTATACGACACCGAACGTGCGACAA
3955_chr15:23600001-23650000_Seq_1622_36330-36359	GCGTCGTTATGGTGCAACGTTAGCGCCTGAATTAGCTATActccagcctgggtgacaaaactggaactccTAGCGCCTGAATTAGCTATATAGCGCCTGAATTAGCTATACGACACCGAACGTGCGACAA
3958_chr15:23600001-23650000_Seq_1625_36525-36554	GCGTCGTTATGGTGCAACGTTAGCGCCTGAATTAGCTATAaaaaagatccaaataaatggagcgatatacTAGCGCCTGAATTAGCTATATAGCGCCTGAATTAGCTATACGACACCGAACGTGCGACAA
3961_chr15:23600001-23650000_Seq_1628_36585-36614	GCGTCGTTATGGTGCAACGTTAGCGCCTGAATTAGCTATAtaaatgtcagttctcccccacttaatatacTAGCGCCTGAATTAGCTATATAGCGCCTGAATTAGCTATACGACACCGAACGTGCGACAA
3964_chr15:23600001-23650000_Seq_1631_36731-36760	GCGTCGTTATGGTGCAACGTTAGCGCCTGAATTAGCTATAaaaaagaatatgggaagaatccctatactcTAGCGCCTGAATTAGCTATATAGCGCCTGAATTAGCTATACGACACCGAACGTGCGACAA
3967_chr15:23600001-23650000_Seq_1634_36807-36836	GCGTCGTTATGGTGCAACGTTAGCGCCTGAATTAGCTATAattggtggagggatatatctctgtataataTAGCGCCTGAATTAGCTATATAGCGCCTGAATTAGCTATACGACACCGAACGTGCGACAA
3970_chr15:23600001-23650000_Seq_1637_36896-36925	GCGTCGTTATGGTGCAACGTTAGCGCCTGAATTAGCTATAgaattcagaactcagaaatagcacacgtaaTAGCGCCTGAATTAGCTATATAGCGCCTGAATTAGCTATACGACACCGAACGTGCGACAA
3973_chr15:23600001-23650000_Seq_1640_37002-37031	GCGTCGTTATGGTGCAACGTTAGCGCCTGAATTAGCTATAcaaatgttaaaatgttaatgaaaccactggTAGCGCCTGAATTAGCTATATAGCGCCTGAATTAGCTATACGACACCGAACGTGCGACAA
3976_chr15:23600001-23650000_Seq_1645_37109-37138	GCGTCGTTATGGTGCAACGTTAGCGCCTGAATTAGCTATAaaactttacgccttattcaaaattagctcaTAGCGCCTGAATTAGCTATATAGCGCCTGAATTAGCTATACGACACCGAACGTGCGACAA
3979_chr15:23600001-23650000_Seq_1649_37224-37253	GCGTCGTTATGGTGCAACGTTAGCGCCTGAATTAGCTATActgatgaagagtacttacatatatatgacaTAGCGCCTGAATTAGCTATATAGCGCCTGAATTAGCTATACGACACCGAACGTGCGACAA
3982_chr15:23600001-23650000_Seq_1652_37290-37319	GCGTCGTTATGGTGCAACGTTAGCGCCTGAATTAGCTATAtcagacttcatcgaaatttaaaacttttgcTAGCGCCTGAATTAGCTATATAGCGCCTGAATTAGCTATACGACACCGAACGTGCGACAA
3985_chr15:23600001-23650000_Seq_1655_37350-37379	GCGTCGTTATGGTGCAACGTTAGCGCCTGAATTAGCTATAgccacactcaacactggggaaaagacttgcTAGCGCCTGAATTAGCTATATAGCGCCTGAATTAGCTATACGACACCGAACGTGCGACAA
3987_chr15:23600001-23650000_Seq_1657_37393-37422	GCGTCGTTATGGTGCAACGTTAGCGCCTGAATTAGCTATAaataaaggactcatatccggaatatagaaaTAGCGCCTGAATTAGCTATATAGCGCCTGAATTAGCTATACGACACCGAACGTGCGACAA
3990_chr15:23600001-23650000_Seq_1666_37615-37644	GCGTCGTTATGGTGCAACGTTAGCGCCTGAATTAGCTATAggtgtgcgcccgtggtcccagctactctggTAGCGCCTGAATTAGCTATATAGCGCCTGAATTAGCTATACGACACCGAACGTGCGACAA
3993_chr15:23600001-23650000_Seq_1673_37786-37815	GCGTCGTTATGGTGCAACGTTAGCGCCTGAATTAGCTATAccattttatcaatgaggatatagaaatgagTAGCGCCTGAATTAGCTATATAGCGCCTGAATTAGCTATACGACACCGAACGTGCGACAA
3996_chr15:23600001-23650000_Seq_1676_37846-37875	GCGTCGTTATGGTGCAACGTTAGCGCCTGAATTAGCTATAgccataagaggaatgtaaattaagaccacaTAGCGCCTGAATTAGCTATATAGCGCCTGAATTAGCTATACGACACCGAACGTGCGACAA
3999_chr15:23600001-23650000_Seq_1679_37906-37935	GCGTCGTTATGGTGCAACGTTAGCGCCTGAATTAGCTATAgccgaattaacaacaacaacaaaaagattaTAGCGCCTGAATTAGCTATATAGCGCCTGAATTAGCTATACGACACCGAACGTGCGACAA
4002_chr15:23600001-23650000_Seq_1695_38296-38325	GCGTCGTTATGGTGCAACGTTAGCGCCTGAATTAGCTATAaagaaagaaatttgttctcatacattgctgTAGCGCCTGAATTAGCTATATAGCGCCTGAATTAGCTATACGACACCGAACGTGCGACAA
4005_chr15:23600001-23650000_Seq_1699_38377-38406	GCGTCGTTATGGTGCAACGTTAGCGCCTGAATTAGCTATAttgaataagtaaccatagacctatcaaatgTAGCGCCTGAATTAGCTATATAGCGCCTGAATTAGCTATACGACACCGAACGTGCGACAA
4008_chr15:23600001-23650000_Seq_1702_38437-38466	GCGTCGTTATGGTGCAACGTTAGCGCCTGAATTAGCTATAacagacaaatgaaaatgtgtgtccttagaaTAGCGCCTGAATTAGCTATATAGCGCCTGAATTAGCTATACGACACCGAACGTGCGACAA
4011_chr15:23600001-23650000_Seq_1705_38508-38537	GCGTCGTTATGGTGCAACGTTAGCGCCTGAATTAGCTATAaaaaatggaaatagccaatcccacaaaacaTAGCGCCTGAATTAGCTATATAGCGCCTGAATTAGCTATACGACACCGAACGTGCGACAA
4014_chr15:23600001-23650000_Seq_1708_38599-38628	GCGTCGTTATGGTGCAACGTTAGCGCCTGAATTAGCTATAgggcatgatactcagtgaaagacgccagtcTAGCGCCTGAATTAGCTATATAGCGCCTGAATTAGCTATACGACACCGAACGTGCGACAA
4017_chr15:23600001-23650000_Seq_1711_38661-38690	GCGTCGTTATGGTGCAACGTTAGCGCCTGAATTAGCTATAtgaaattacaaagttatggagatgaagatcTAGCGCCTGAATTAGCTATATAGCGCCTGAATTAGCTATACGACACCGAACGTGCGACAA
4020_chr15:23600001-23650000_Seq_1714_38721-38750	GCGTCGTTATGGTGCAACGTTAGCGCCTGAATTAGCTATAgggggaaagagatggacacagctgtaaaggTAGCGCCTGAATTAGCTATATAGCGCCTGAATTAGCTATACGACACCGAACGTGCGACAA
4023_chr15:23600001-23650000_Seq_1717_38781-38810	GCGTCGTTATGGTGCAACGTTAGCGCCTGAATTAGCTATAgaagagtgctgcatcttgattgcagtgctaTAGCGCCTGAATTAGCTATATAGCGCCTGAATTAGCTATACGACACCGAACGTGCGACAA
4026_chr15:23600001-23650000_Seq_1720_38841-38870	GCGTCGTTATGGTGCAACGTTAGCGCCTGAATTAGCTATAcattgagttgagctgaacgtgcagatggtaTAGCGCCTGAATTAGCTATATAGCGCCTGAATTAGCTATACGACACCGAACGTGCGACAA
4029_chr15:23600001-23650000_Seq_1723_38901-38930	GCGTCGTTATGGTGCAACGTTAGCGCCTGAATTAGCTATAgctatacaggatataaacactgggggaaacTAGCGCCTGAATTAGCTATATAGCGCCTGAATTAGCTATACGACACCGAACGTGCGACAA
4032_chr15:23600001-23650000_Seq_1726_38961-38990	GCGTCGTTATGGTGCAACGTTAGCGCCTGAATTAGCTATAcagtttttgctatttcctgtgaatctatgaTAGCGCCTGAATTAGCTATATAGCGCCTGAATTAGCTATACGACACCGAACGTGCGACAA
4035_chr15:23600001-23650000_Seq_1729_39029-39058	GCGTCGTTATGGTGCAACGTTAGCGCCTGAATTAGCTATAAAGCTTGTTACaaggccaatattttgattcTAGCGCCTGAATTAGCTATATAGCGCCTGAATTAGCTATACGACACCGAACGTGCGACAA
4038_chr15:23600001-23650000_Seq_1732_39089-39118	GCGTCGTTATGGTGCAACGTTAGCGCCTGAATTAGCTATAtttcaggggaagattctgagccattggagaTAGCGCCTGAATTAGCTATATAGCGCCTGAATTAGCTATACGACACCGAACGTGCGACAA
4041_chr15:23600001-23650000_Seq_1735_39149-39178	GCGTCGTTATGGTGCAACGTTAGCGCCTGAATTAGCTATAaatgTTCTGTGGTGATTGCTTCTGTTAACATAGCGCCTGAATTAGCTATATAGCGCCTGAATTAGCTATACGACACCGAACGTGCGACAA
4043_chr15:23600001-23650000_Seq_1738_39209-39238	GCGTCGTTATGGTGCAACGTTAGCGCCTGAATTAGCTATAAGGGATAGCACAGAAAGCAAGTCTCATTGGTAGCGCCTGAATTAGCTATATAGCGCCTGAATTAGCTATACGACACCGAACGTGCGACAA
4046_chr15:23600001-23650000_Seq_1741_39269-39298	GCGTCGTTATGGTGCAACGTTAGCGCCTGAATTAGCTATACATTTGCACAGAGAAGCGCATGCCGCTGACTAGCGCCTGAATTAGCTATATAGCGCCTGAATTAGCTATACGACACCGAACGTGCGACAA
4049_chr15:23600001-23650000_Seq_1744_39329-39358	GCGTCGTTATGGTGCAACGTTAGCGCCTGAATTAGCTATAATAAGAGTAGGAGGAAGCTGATAATGAAGATAGCGCCTGAATTAGCTATATAGCGCCTGAATTAGCTATACGACACCGAACGTGCGACAA
4052_chr15:23600001-23650000_Seq_1747_39389-39418	GCGTCGTTATGGTGCAACGTTAGCGCCTGAATTAGCTATAGAGGCAGGTACAACTTTCAGAATCTCGACATAGCGCCTGAATTAGCTATATAGCGCCTGAATTAGCTATACGACACCGAACGTGCGACAA
4055_chr15:23600001-23650000_Seq_1750_39449-39478	GCGTCGTTATGGTGCAACGTTAGCGCCTGAATTAGCTATAGTAGTGTTGTATATATCCCTTGGTGGAATTTAGCGCCTGAATTAGCTATATAGCGCCTGAATTAGCTATACGACACCGAACGTGCGACAA
4058_chr15:23600001-23650000_Seq_1753_39509-39538	GCGTCGTTATGGTGCAACGTTAGCGCCTGAATTAGCTATAAACAAATTTGCTTGCACACAGGAAAATGTATAGCGCCTGAATTAGCTATATAGCGCCTGAATTAGCTATACGACACCGAACGTGCGACAA
4061_chr15:23600001-23650000_Seq_1756_39569-39598	GCGTCGTTATGGTGCAACGTTAGCGCCTGAATTAGCTATACCTTTAGGACCCTCCTGGTGGTCTGCTTAGTAGCGCCTGAATTAGCTATATAGCGCCTGAATTAGCTATACGACACCGAACGTGCGACAA
4064_chr15:23600001-23650000_Seq_1759_39629-39658	GCGTCGTTATGGTGCAACGTTAGCGCCTGAATTAGCTATAGAGCTGTCCCACAGAGGGACCCCTGGCATGTAGCGCCTGAATTAGCTATATAGCGCCTGAATTAGCTATACGACACCGAACGTGCGACAA
4067_chr15:23600001-23650000_Seq_1762_39689-39718	GCGTCGTTATGGTGCAACGTTAGCGCCTGAATTAGCTATATCTAACCAGCCGCTCCTGGACCCTCACGTGTAGCGCCTGAATTAGCTATATAGCGCCTGAATTAGCTATACGACACCGAACGTGCGACAA
4070_chr15:23600001-23650000_Seq_1765_39749-39778	GCGTCGTTATGGTGCAACGTTAGCGCCTGAATTAGCTATAACTCTAAGGAACACTGAAGGCCTTGAAATGTAGCGCCTGAATTAGCTATATAGCGCCTGAATTAGCTATACGACACCGAACGTGCGACAA
4073_chr15:23600001-23650000_Seq_1768_39824-39853	GCGTCGTTATGGTGCAACGTTAGCGCCTGAATTAGCTATAGGCGGCACAGAGGCCCCTGTGCAGCCAATGTAGCGCCTGAATTAGCTATATAGCGCCTGAATTAGCTATACGACACCGAACGTGCGACAA
4076_chr15:23600001-23650000_Seq_1771_39884-39913	GCGTCGTTATGGTGCAACGTTAGCGCCTGAATTAGCTATAGCAGAGACCATGAAAAAGGAAACTGCCAAGTAGCGCCTGAATTAGCTATATAGCGCCTGAATTAGCTATACGACACCGAACGTGCGACAA
4079_chr15:23600001-23650000_Seq_1774_39953-39982	GCGTCGTTATGGTGCAACGTTAGCGCCTGAATTAGCTATAAAAAACACTGACATACAAATTGGCAAAACGTAGCGCCTGAATTAGCTATATAGCGCCTGAATTAGCTATACGACACCGAACGTGCGACAA
4082_chr15:23600001-23650000_Seq_1777_40013-40042	GCGTCGTTATGGTGCAACGTTAGCGCCTGAATTAGCTATAAGAAAAAGGGACCCAGGCTTCCAGCCCCGGTAGCGCCTGAATTAGCTATATAGCGCCTGAATTAGCTATACGACACCGAACGTGCGACAA
4085_chr15:23600001-23650000_Seq_1780_40073-40102	GCGTCGTTATGGTGCAACGTTAGCGCCTGAATTAGCTATAATCCTTTCAAGTATCATGACCATCGGGGTGTAGCGCCTGAATTAGCTATATAGCGCCTGAATTAGCTATACGACACCGAACGTGCGACAA
4088_chr15:23600001-23650000_Seq_1783_40133-40162	GCGTCGTTATGGTGCAACGTTAGCGCCTGAATTAGCTATACTGAGGGCAAATCAATAATATAGGCTACATTAGCGCCTGAATTAGCTATATAGCGCCTGAATTAGCTATACGACACCGAACGTGCGACAA
4091_chr15:23600001-23650000_Seq_1786_40193-40222	GCGTCGTTATGGTGCAACGTTAGCGCCTGAATTAGCTATAAGGGCCCCGGCCCCTTAATCTTGAAAGTCCTAGCGCCTGAATTAGCTATATAGCGCCTGAATTAGCTATACGACACCGAACGTGCGACAA
4094_chr15:23600001-23650000_Seq_1789_40253-40282	GCGTCGTTATGGTGCAACGTTAGCGCCTGAATTAGCTATATCGTTTGCTGACAAGGTTGATTCACTGgtgTAGCGCCTGAATTAGCTATATAGCGCCTGAATTAGCTATACGACACCGAACGTGCGACAA
4096_chr15:23600001-23650000_Seq_1791_40293-40322	GCGTCGTTATGGTGCAACGTTAGCGCCTGAATTAGCTATAacaaccggtccttttctctgttgctctcagTAGCGCCTGAATTAGCTATATAGCGCCTGAATTAGCTATACGACACCGAACGTGCGACAA
4099_chr15:23600001-23650000_Seq_1794_40387-40416	GCGTCGTTATGGTGCAACGTTAGCGCCTGAATTAGCTATAaatattaacttgcttatagttgaacactcgTAGCGCCTGAATTAGCTATATAGCGCCTGAATTAGCTATACGACACCGAACGTGCGACAA
4102_chr15:23600001-23650000_Seq_1798_40483-40512	GCGTCGTTATGGTGCAACGTTAGCGCCTGAATTAGCTATAtttactgaggtcatttatggctttggagagTAGCGCCTGAATTAGCTATATAGCGCCTGAATTAGCTATACGACACCGAACGTGCGACAA
4105_chr15:23600001-23650000_Seq_1801_40543-40572	GCGTCGTTATGGTGCAACGTTAGCGCCTGAATTAGCTATAgcacagagtgcaatgacttctctacagcccTAGCGCCTGAATTAGCTATATAGCGCCTGAATTAGCTATACGACACCGAACGTGCGACAA
4108_chr15:23600001-23650000_Seq_1804_40603-40632	GCGTCGTTATGGTGCAACGTTAGCGCCTGAATTAGCTATAtgtgtgttgaaacaaactacaagttgttttTAGCGCCTGAATTAGCTATATAGCGCCTGAATTAGCTATACGACACCGAACGTGCGACAA
4111_chr15:23600001-23650000_Seq_1807_40670-40699	GCGTCGTTATGGTGCAACGTTAGCGCCTGAATTAGCTATAGTACTCCCTTGACACTGTAGGTTTATATTGTAGCGCCTGAATTAGCTATATAGCGCCTGAATTAGCTATACGACACCGAACGTGCGACAA
4114_chr15:23600001-23650000_Seq_1810_40745-40774	GCGTCGTTATGGTGCAACGTTAGCGCCTGAATTAGCTATAtgaacagctttctctatgaagaagtctttgTAGCGCCTGAATTAGCTATATAGCGCCTGAATTAGCTATACGACACCGAACGTGCGACAA
4117_chr15:23600001-23650000_Seq_1813_40807-40836	GCGTCGTTATGGTGCAACGTTAGCGCCTGAATTAGCTATAtcccaaatgaagaatttctaggtaaaatagTAGCGCCTGAATTAGCTATATAGCGCCTGAATTAGCTATACGACACCGAACGTGCGACAA
4120_chr15:23600001-23650000_Seq_1816_40867-40896	GCGTCGTTATGGTGCAACGTTAGCGCCTGAATTAGCTATAagttggctgcattgatttccaggcaaattgTAGCGCCTGAATTAGCTATATAGCGCCTGAATTAGCTATACGACACCGAACGTGCGACAA
4123_chr15:23600001-23650000_Seq_1819_40928-40957	GCGTCGTTATGGTGCAACGTTAGCGCCTGAATTAGCTATAatggttccagtttcataacaatatcattgaTAGCGCCTGAATTAGCTATATAGCGCCTGAATTAGCTATACGACACCGAACGTGCGACAA
4126_chr15:23600001-23650000_Seq_1822_41031-41060	GCGTCGTTATGGTGCAACGTTAGCGCCTGAATTAGCTATAatttctatctttattagtgaggtgtaacagTAGCGCCTGAATTAGCTATATAGCGCCTGAATTAGCTATACGACACCGAACGTGCGACAA
4129_chr15:23600001-23650000_Seq_1825_41102-41131	GCGTCGTTATGGTGCAACGTTAGCGCCTGAATTAGCTATAGCCTATTACTAGGTTTGGGCTTTTTGCTCATAGCGCCTGAATTAGCTATATAGCGCCTGAATTAGCTATACGACACCGAACGTGCGACAA
4132_chr15:23600001-23650000_Seq_1832_41321-41350	GCGTCGTTATGGTGCAACGTTAGCGCCTGAATTAGCTATAcactgcaagctccacctccatgattcatgcTAGCGCCTGAATTAGCTATATAGCGCCTGAATTAGCTATACGACACCGAACGTGCGACAA
4135_chr15:23600001-23650000_Seq_1843_41566-41595	GCGTCGTTATGGTGCAACGTTAGCGCCTGAATTAGCTATATTTAACCTGTATTTTTCTATATTCCTGGTCTAGCGCCTGAATTAGCTATATAGCGCCTGAATTAGCTATACGACACCGAACGTGCGACAA
4138_chr15:23600001-23650000_Seq_1846_41626-41655	GCGTCGTTATGGTGCAACGTTAGCGCCTGAATTAGCTATACTGCACTTTCTTAAACTTTTCAGTTGAATATAGCGCCTGAATTAGCTATATAGCGCCTGAATTAGCTATACGACACCGAACGTGCGACAA
4141_chr15:23600001-23650000_Seq_1849_41721-41750	GCGTCGTTATGGTGCAACGTTAGCGCCTGAATTAGCTATATATAAACAAATTTAGGCTTTAAGTCCTTGGTAGCGCCTGAATTAGCTATATAGCGCCTGAATTAGCTATACGACACCGAACGTGCGACAA
4144_chr15:23600001-23650000_Seq_1852_41781-41810	GCGTCGTTATGGTGCAACGTTAGCGCCTGAATTAGCTATATCACGTGTGAGAGTGAGGTTTGCAGCTGGGTAGCGCCTGAATTAGCTATATAGCGCCTGAATTAGCTATACGACACCGAACGTGCGACAA
4147_chr15:23600001-23650000_Seq_1855_41841-41870	GCGTCGTTATGGTGCAACGTTAGCGCCTGAATTAGCTATAAGCCCCCACCTTAAGTATGGCACCAAAGTCTAGCGCCTGAATTAGCTATATAGCGCCTGAATTAGCTATACGACACCGAACGTGCGACAA
4150_chr15:23600001-23650000_Seq_1858_41901-41930	GCGTCGTTATGGTGCAACGTTAGCGCCTGAATTAGCTATACAAAGTCCCAAATTTTGTTCCACAAAGAGCTAGCGCCTGAATTAGCTATATAGCGCCTGAATTAGCTATACGACACCGAACGTGCGACAA
4152_chr15:23600001-23650000_Seq_1860_41941-41970	GCGTCGTTATGGTGCAACGTTAGCGCCTGAATTAGCTATAGGCACGCCATGAGTTAATGGTCTGGAGAAATAGCGCCTGAATTAGCTATATAGCGCCTGAATTAGCTATACGACACCGAACGTGCGACAA
4155_chr15:23600001-23650000_Seq_1863_42032-42061	GCGTCGTTATGGTGCAACGTTAGCGCCTGAATTAGCTATATTTACTGGCCCAGCAAAACCTCCTTTGGGGTAGCGCCTGAATTAGCTATATAGCGCCTGAATTAGCTATACGACACCGAACGTGCGACAA
4158_chr15:23600001-23650000_Seq_1866_42092-42121	GCGTCGTTATGGTGCAACGTTAGCGCCTGAATTAGCTATATTCAATGGACATTTGCTGTTGTTGTAAAAATAGCGCCTGAATTAGCTATATAGCGCCTGAATTAGCTATACGACACCGAACGTGCGACAA
4161_chr15:23600001-23650000_Seq_1869_42152-42181	GCGTCGTTATGGTGCAACGTTAGCGCCTGAATTAGCTATAAGGACTCTCTGACCCAAGGAGTTTATAGGATAGCGCCTGAATTAGCTATATAGCGCCTGAATTAGCTATACGACACCGAACGTGCGACAA
4164_chr15:23600001-23650000_Seq_1872_42212-42241	GCGTCGTTATGGTGCAACGTTAGCGCCTGAATTAGCTATACACTTAGACAACTTGAGAAAGAGCTCCTGCTAGCGCCTGAATTAGCTATATAGCGCCTGAATTAGCTATACGACACCGAACGTGCGACAA
4167_chr15:23600001-23650000_Seq_1875_42292-42321	GCGTCGTTATGGTGCAACGTTAGCGCCTGAATTAGCTATAGCGGGTGCTAGGAGTAGAGTCTGCATCTTGTAGCGCCTGAATTAGCTATATAGCGCCTGAATTAGCTATACGACACCGAACGTGCGACAA
4170_chr15:23600001-23650000_Seq_1878_42352-42381	GCGTCGTTATGGTGCAACGTTAGCGCCTGAATTAGCTATAGGCAGCGCTGCAGGACCAAGGATAGAAATTTAGCGCCTGAATTAGCTATATAGCGCCTGAATTAGCTATACGACACCGAACGTGCGACAA
4173_chr15:23600001-23650000_Seq_1881_42412-42441	GCGTCGTTATGGTGCAACGTTAGCGCCTGAATTAGCTATACAGATGCTACCTTGGCCTATAAGAGAAAAGTAGCGCCTGAATTAGCTATATAGCGCCTGAATTAGCTATACGACACCGAACGTGCGACAA
4176_chr15:23600001-23650000_Seq_1884_42472-42501	GCGTCGTTATGGTGCAACGTTAGCGCCTGAATTAGCTATAATTATGAGCAAAAGTGGTGAAGCAAGGAGTTAGCGCCTGAATTAGCTATATAGCGCCTGAATTAGCTATACGACACCGAACGTGCGACAA
4179_chr15:23600001-23650000_Seq_1887_42532-42561	GCGTCGTTATGGTGCAACGTTAGCGCCTGAATTAGCTATAAAGTTAAGCACTGTGGGAGGGGCTGTTGCTTAGCGCCTGAATTAGCTATATAGCGCCTGAATTAGCTATACGACACCGAACGTGCGACAA
4182_chr15:23600001-23650000_Seq_1890_42593-42622	GCGTCGTTATGGTGCAACGTTAGCGCCTGAATTAGCTATAGCTAGGTGGCAGGAGAATTCCACCATCGCCTAGCGCCTGAATTAGCTATATAGCGCCTGAATTAGCTATACGACACCGAACGTGCGACAA
4185_chr15:23600001-23650000_Seq_1893_42653-42682	GCGTCGTTATGGTGCAACGTTAGCGCCTGAATTAGCTATACTAGAAGCGGGATATGGGATTGGATTTCTTTAGCGCCTGAATTAGCTATATAGCGCCTGAATTAGCTATACGACACCGAACGTGCGACAA
4188_chr15:23600001-23650000_Seq_1896_42713-42742	GCGTCGTTATGGTGCAACGTTAGCGCCTGAATTAGCTATATAGGGCTGATGGTCCCCTGTCCACAGGAAGTAGCGCCTGAATTAGCTATATAGCGCCTGAATTAGCTATACGACACCGAACGTGCGACAA
4191_chr15:23600001-23650000_Seq_1899_42773-42802	GCGTCGTTATGGTGCAACGTTAGCGCCTGAATTAGCTATATACACCAGCCTGGTGTGTGCTTGAATATCCTAGCGCCTGAATTAGCTATATAGCGCCTGAATTAGCTATACGACACCGAACGTGCGACAA
4194_chr15:23600001-23650000_Seq_1902_42833-42862	GCGTCGTTATGGTGCAACGTTAGCGCCTGAATTAGCTATACTTGTCCCTTTCCTGCCTAGACCAGGTTCATAGCGCCTGAATTAGCTATATAGCGCCTGAATTAGCTATACGACACCGAACGTGCGACAA
4197_chr15:23600001-23650000_Seq_1905_42893-42922	GCGTCGTTATGGTGCAACGTTAGCGCCTGAATTAGCTATAACTTCAGGCGTTGCCGGCTGCCTTCCCCTATAGCGCCTGAATTAGCTATATAGCGCCTGAATTAGCTATACGACACCGAACGTGCGACAA
4200_chr15:23600001-23650000_Seq_1908_42962-42991	GCGTCGTTATGGTGCAACGTTAGCGCCTGAATTAGCTATAAACTCTATGTTGATAGGAATGCACCCTGCCTAGCGCCTGAATTAGCTATATAGCGCCTGAATTAGCTATACGACACCGAACGTGCGACAA
4203_chr15:23600001-23650000_Seq_1911_43022-43051	GCGTCGTTATGGTGCAACGTTAGCGCCTGAATTAGCTATAGGCAATCTGCAGGGTTTCTAATTAAATGAATAGCGCCTGAATTAGCTATATAGCGCCTGAATTAGCTATACGACACCGAACGTGCGACAA
4205_chr15:23600001-23650000_Seq_1913_43078-43107	GCGTCGTTATGGTGCAACGTTAGCGCCTGAATTAGCTATAAAGCCTGGATATCCTGCAGGGAGCACGTTTTAGCGCCTGAATTAGCTATATAGCGCCTGAATTAGCTATACGACACCGAACGTGCGACAA
4208_chr15:23600001-23650000_Seq_1916_43138-43167	GCGTCGTTATGGTGCAACGTTAGCGCCTGAATTAGCTATACAAATTTGAACTGCTGGACACCCCGCCACGTAGCGCCTGAATTAGCTATATAGCGCCTGAATTAGCTATACGACACCGAACGTGCGACAA
4211_chr15:23600001-23650000_Seq_1919_43198-43227	GCGTCGTTATGGTGCAACGTTAGCGCCTGAATTAGCTATACAAATTCTCCATGAAGCGGGACCACCTGGTTAGCGCCTGAATTAGCTATATAGCGCCTGAATTAGCTATACGACACCGAACGTGCGACAA
4214_chr15:23600001-23650000_Seq_1922_43258-43287	GCGTCGTTATGGTGCAACGTTAGCGCCTGAATTAGCTATACTTCTCCACATACCCTTAAGGACATTTCTGTAGCGCCTGAATTAGCTATATAGCGCCTGAATTAGCTATACGACACCGAACGTGCGACAA
4217_chr15:23600001-23650000_Seq_1925_43318-43347	GCGTCGTTATGGTGCAACGTTAGCGCCTGAATTAGCTATATAACGTGTGTGCTTTAATTAATCTCCTGGATAGCGCCTGAATTAGCTATATAGCGCCTGAATTAGCTATACGACACCGAACGTGCGACAA
4220_chr15:23600001-23650000_Seq_1928_43378-43407	GCGTCGTTATGGTGCAACGTTAGCGCCTGAATTAGCTATACACTGCATCCTTATAAAGATGAATGGAGTATAGCGCCTGAATTAGCTATATAGCGCCTGAATTAGCTATACGACACCGAACGTGCGACAA
4223_chr15:23600001-23650000_Seq_1931_43438-43467	GCGTCGTTATGGTGCAACGTTAGCGCCTGAATTAGCTATAGTTTTTACTATAACTGAGAGTAGTCTTGCTTAGCGCCTGAATTAGCTATATAGCGCCTGAATTAGCTATACGACACCGAACGTGCGACAA
4226_chr15:23600001-23650000_Seq_1934_43498-43527	GCGTCGTTATGGTGCAACGTTAGCGCCTGAATTAGCTATACTTGGCTTCCACCATCTAGTGTAAAAATTATAGCGCCTGAATTAGCTATATAGCGCCTGAATTAGCTATACGACACCGAACGTGCGACAA
4229_chr15:23600001-23650000_Seq_2116_47878-47907	GCGTCGTTATGGTGCAACGTTAGCGCCTGAATTAGCTATACGCTCCGCAGCTTTCCGCAGTAAGGAGGAGTAGCGCCTGAATTAGCTATATAGCGCCTGAATTAGCTATACGACACCGAACGTGCGACAA
4232_chr15:23600001-23650000_Seq_2119_47957-47986	GCGTCGTTATGGTGCAACGTTAGCGCCTGAATTAGCTATAGTGGATATTGCATAGGGGCGTCTACCGGAGTAGCGCCTGAATTAGCTATATAGCGCCTGAATTAGCTATACGACACCGAACGTGCGACAA
4235_chr15:23600001-23650000_Seq_2122_48017-48046	GCGTCGTTATGGTGCAACGTTAGCGCCTGAATTAGCTATATGTCCAGTCCCCAAATGCAGACCAGTCAGATAGCGCCTGAATTAGCTATATAGCGCCTGAATTAGCTATACGACACCGAACGTGCGACAA
4238_chr15:23600001-23650000_Seq_2125_48077-48106	GCGTCGTTATGGTGCAACGTTAGCGCCTGAATTAGCTATAgacaggaacccatccatgttttagaaaaatTAGCGCCTGAATTAGCTATATAGCGCCTGAATTAGCTATACGACACCGAACGTGCGACAA
4241_chr15:23600001-23650000_Seq_2128_48137-48166	GCGTCGTTATGGTGCAACGTTAGCGCCTGAATTAGCTATACCACTGGAAACATGGAAGGTATCCAAGACGTAGCGCCTGAATTAGCTATATAGCGCCTGAATTAGCTATACGACACCGAACGTGCGACAA
4244_chr15:23600001-23650000_Seq_2131_48235-48264	GCGTCGTTATGGTGCAACGTTAGCGCCTGAATTAGCTATAAGAGTTCCAGGAGTTATAGCAGACAGATACTAGCGCCTGAATTAGCTATATAGCGCCTGAATTAGCTATACGACACCGAACGTGCGACAA
4247_chr15:23600001-23650000_Seq_2134_48311-48340	GCGTCGTTATGGTGCAACGTTAGCGCCTGAATTAGCTATACAAGTCCCTGCCTGGAGAAAGTGGGAAGTTTAGCGCCTGAATTAGCTATATAGCGCCTGAATTAGCTATACGACACCGAACGTGCGACAA
4250_chr15:23600001-23650000_Seq_2137_48371-48400	GCGTCGTTATGGTGCAACGTTAGCGCCTGAATTAGCTATAGAGAGGCACACGGGAAGAGAGGCTGATGAGTAGCGCCTGAATTAGCTATATAGCGCCTGAATTAGCTATACGACACCGAACGTGCGACAA
4253_chr15:23600001-23650000_Seq_2140_48431-48460	GCGTCGTTATGGTGCAACGTTAGCGCCTGAATTAGCTATAGTGGGACTGCCAAGGAGAGATACCCTGTAGTAGCGCCTGAATTAGCTATATAGCGCCTGAATTAGCTATACGACACCGAACGTGCGACAA
4256_chr15:23600001-23650000_Seq_2143_48491-48520	GCGTCGTTATGGTGCAACGTTAGCGCCTGAATTAGCTATACTTGGCTATTCCTCATGAAAATAGAGTTGTTAGCGCCTGAATTAGCTATATAGCGCCTGAATTAGCTATACGACACCGAACGTGCGACAA
4259_chr15:23600001-23650000_Seq_2146_48551-48580	GCGTCGTTATGGTGCAACGTTAGCGCCTGAATTAGCTATAAGAACACAGGCATGTTAGAGACACATGGAGTAGCGCCTGAATTAGCTATATAGCGCCTGAATTAGCTATACGACACCGAACGTGCGACAA
4261_chr15:23600001-23650000_Seq_2149_48611-48640	GCGTCGTTATGGTGCAACGTTAGCGCCTGAATTAGCTATAAAAAGAAGTCACGGAACTGAGACATGCCACTAGCGCCTGAATTAGCTATATAGCGCCTGAATTAGCTATACGACACCGAACGTGCGACAA
4264_chr15:23600001-23650000_Seq_2152_48671-48700	GCGTCGTTATGGTGCAACGTTAGCGCCTGAATTAGCTATAGGAAAACTGCCTGTGGAATGGCTCGGATGCTAGCGCCTGAATTAGCTATATAGCGCCTGAATTAGCTATACGACACCGAACGTGCGACAA
4267_chr15:23600001-23650000_Seq_2155_48756-48785	GCGTCGTTATGGTGCAACGTTAGCGCCTGAATTAGCTATAAAAAATGAAAACCAAATAACGCACCTGAAGTAGCGCCTGAATTAGCTATATAGCGCCTGAATTAGCTATACGACACCGAACGTGCGACAA
4270_chr15:23600001-23650000_Seq_2158_48859-48888	GCGTCGTTATGGTGCAACGTTAGCGCCTGAATTAGCTATAAAAAATTTCTGGGGAAACTTCTCGTGACAATAGCGCCTGAATTAGCTATATAGCGCCTGAATTAGCTATACGACACCGAACGTGCGACAA
4273_chr15:23600001-23650000_Seq_2161_48924-48953	GCGTCGTTATGGTGCAACGTTAGCGCCTGAATTAGCTATACAGATAAAGCAGATGACAATAGTATTATTGTAGCGCCTGAATTAGCTATATAGCGCCTGAATTAGCTATACGACACCGAACGTGCGACAA
4276_chr15:23600001-23650000_Seq_2164_48985-49014	GCGTCGTTATGGTGCAACGTTAGCGCCTGAATTAGCTATAAGTGATAATCTCAGTAATTGAAAAGCTTTCTAGCGCCTGAATTAGCTATATAGCGCCTGAATTAGCTATACGACACCGAACGTGCGACAA
4279_chr15:23600001-23650000_Seq_2168_49065-49094	GCGTCGTTATGGTGCAACGTTAGCGCCTGAATTAGCTATAGTTGGCAGCCTACGGCAGGAGTCCAGAGTGTAGCGCCTGAATTAGCTATATAGCGCCTGAATTAGCTATACGACACCGAACGTGCGACAA
4282_chr15:23600001-23650000_Seq_2171_49125-49154	GCGTCGTTATGGTGCAACGTTAGCGCCTGAATTAGCTATAACGATGAAGGGTACACCCCACTCCTTCCCATAGCGCCTGAATTAGCTATATAGCGCCTGAATTAGCTATACGACACCGAACGTGCGACAA
4285_chr15:23600001-23650000_Seq_2174_49185-49214	GCGTCGTTATGGTGCAACGTTAGCGCCTGAATTAGCTATAGTAATTTATGGACCCAAGAGAAGGTATGTATAGCGCCTGAATTAGCTATATAGCGCCTGAATTAGCTATACGACACCGAACGTGCGACAA
4288_chr15:23600001-23650000_Seq_2177_49254-49283	GCGTCGTTATGGTGCAACGTTAGCGCCTGAATTAGCTATAAGAATTTGGGGGTAAAGTTTCAGTGATTTTTAGCGCCTGAATTAGCTATATAGCGCCTGAATTAGCTATACGACACCGAACGTGCGACAA
4291_chr15:23600001-23650000_Seq_2180_49314-49343	GCGTCGTTATGGTGCAACGTTAGCGCCTGAATTAGCTATAGGAAACTCTTTTCAAAACAGTCAGATTTTTTAGCGCCTGAATTAGCTATATAGCGCCTGAATTAGCTATACGACACCGAACGTGCGACAA
4294_chr15:23600001-23650000_Seq_2183_49390-49419	GCGTCGTTATGGTGCAACGTTAGCGCCTGAATTAGCTATAgatacattccaaaactctcgatgcccgaacTAGCGCCTGAATTAGCTATATAGCGCCTGAATTAGCTATACGACACCGAACGTGCGACAA
4297_chr15:23600001-23650000_Seq_2186_49450-49479	GCGTCGTTATGGTGCAACGTTAGCGCCTGAATTAGCTATAatgtATCCCtttcattctccttcttcacaaTAGCGCCTGAATTAGCTATATAGCGCCTGAATTAGCTATACGACACCGAACGTGCGACAA
4300_chr15:23600001-23650000_Seq_2191_49576-49605	GCGTCGTTATGGTGCAACGTTAGCGCCTGAATTAGCTATAcaaggaagcacttcatagcttccgtttggcTAGCGCCTGAATTAGCTATATAGCGCCTGAATTAGCTATACGACACCGAACGTGCGACAA
4303_chr15:23600001-23650000_Seq_2194_49636-49665	GCGTCGTTATGGTGCAACGTTAGCGCCTGAATTAGCTATAcattttggggctattactaagtaaaacaagTAGCGCCTGAATTAGCTATATAGCGCCTGAATTAGCTATACGACACCGAACGTGCGACAA
4306_chr15:23600001-23650000_Seq_2198_49716-49745	GCGTCGTTATGGTGCAACGTTAGCGCCTGAATTAGCTATAagcagctactaagtggttaatgagcaggtaTAGCGCCTGAATTAGCTATATAGCGCCTGAATTAGCTATACGACACCGAACGTGCGACAA
4309_chr15:23600001-23650000_Seq_2201_49776-49805	GCGTCGTTATGGTGCAACGTTAGCGCCTGAATTAGCTATAtttcacattgtgtggtttcagttacctgcaTAGCGCCTGAATTAGCTATATAGCGCCTGAATTAGCTATACGACACCGAACGTGCGACAA
4312_chr15:23600001-23650000_Seq_2204_49888-49917	GCGTCGTTATGGTGCAACGTTAGCGCCTGAATTAGCTATAtatgaaattgttctgtttcgtcctgcctggTAGCGCCTGAATTAGCTATATAGCGCCTGAATTAGCTATACGACACCGAACGTGCGACAA
4314_chr15:23600001-23650000_Seq_2207_49948-49977	GCGTCGTTATGGTGCAACGTTAGCGCCTGAATTAGCTATAcatgctgtatatgctacccgcctgttattcTAGCGCCTGAATTAGCTATATAGCGCCTGAATTAGCTATACGACACCGAACGTGCGACAA
4317_chr15:23650001-23700000_Seq_3_62-91	GCGTCGTTATGGTGCAACGTGTTCACCGGAATACTTCTGAgggggtctcagaatatatcccccaaggataGTTCACCGGAATACTTCTGAGTTCACCGGAATACTTCTGACGACACCGAACGTGCGACAA
4320_chr15:23650001-23700000_Seq_6_122-151	GCGTCGTTATGGTGCAACGTGTTCACCGGAATACTTCTGAATCCCCAGAGAAGGCCATCTACCACAGCACGTTCACCGGAATACTTCTGAGTTCACCGGAATACTTCTGACGACACCGAACGTGCGACAA
4323_chr15:23650001-23700000_Seq_9_182-211	GCGTCGTTATGGTGCAACGTGTTCACCGGAATACTTCTGAGTGTTTCATGGTTTTCGTTTCTCCCTTGGGGTTCACCGGAATACTTCTGAGTTCACCGGAATACTTCTGACGACACCGAACGTGCGACAA
4326_chr15:23650001-23700000_Seq_12_242-271	GCGTCGTTATGGTGCAACGTGTTCACCGGAATACTTCTGAAGTTTCATGGGGGTTTGGAAACACTGTAGAGTTCACCGGAATACTTCTGAGTTCACCGGAATACTTCTGACGACACCGAACGTGCGACAA
4329_chr15:23650001-23700000_Seq_15_302-331	GCGTCGTTATGGTGCAACGTGTTCACCGGAATACTTCTGAACCTGCTATTATCAACTCTGCTACATGGCTGTTCACCGGAATACTTCTGAGTTCACCGGAATACTTCTGACGACACCGAACGTGCGACAA
4332_chr15:23650001-23700000_Seq_18_370-399	GCGTCGTTATGGTGCAACGTGTTCACCGGAATACTTCTGATTTTTAGCCTAGGGCATTTCTAAAGCATACGTTCACCGGAATACTTCTGAGTTCACCGGAATACTTCTGACGACACCGAACGTGCGACAA
4335_chr15:23650001-23700000_Seq_21_444-473	GCGTCGTTATGGTGCAACGTGTTCACCGGAATACTTCTGAAGTTCTCCCACTAACCGTTTATTTTCGGGAGTTCACCGGAATACTTCTGAGTTCACCGGAATACTTCTGACGACACCGAACGTGCGACAA
4338_chr15:23650001-23700000_Seq_24_504-533	GCGTCGTTATGGTGCAACGTGTTCACCGGAATACTTCTGATGCTGTTGGTCATCCCACACAATGAATGGCGTTCACCGGAATACTTCTGAGTTCACCGGAATACTTCTGACGACACCGAACGTGCGACAA
4341_chr15:23650001-23700000_Seq_27_564-593	GCGTCGTTATGGTGCAACGTGTTCACCGGAATACTTCTGAGTTGGAGGTCAGTGAATAGCACTGACATACGTTCACCGGAATACTTCTGAGTTCACCGGAATACTTCTGACGACACCGAACGTGCGACAA
4344_chr15:23650001-23700000_Seq_30_624-653	GCGTCGTTATGGTGCAACGTGTTCACCGGAATACTTCTGAAAAAGAGGTCCGGTTTATGTTAAGAGGCAAGTTCACCGGAATACTTCTGAGTTCACCGGAATACTTCTGACGACACCGAACGTGCGACAA
4347_chr15:23650001-23700000_Seq_33_695-724	GCGTCGTTATGGTGCAACGTGTTCACCGGAATACTTCTGAAAAAACAGGTGCGTAGGAGTAGTTAGAAATGTTCACCGGAATACTTCTGAGTTCACCGGAATACTTCTGACGACACCGAACGTGCGACAA
4350_chr15:23650001-23700000_Seq_36_755-784	GCGTCGTTATGGTGCAACGTGTTCACCGGAATACTTCTGATTGCCACTGCTTGGAAACATTCTTTAACCGGTTCACCGGAATACTTCTGAGTTCACCGGAATACTTCTGACGACACCGAACGTGCGACAA
4353_chr15:23650001-23700000_Seq_39_816-845	GCGTCGTTATGGTGCAACGTGTTCACCGGAATACTTCTGAGATTCTATAGGAACAAGTAAAGAGGGTAAAGTTCACCGGAATACTTCTGAGTTCACCGGAATACTTCTGACGACACCGAACGTGCGACAA
4356_chr15:23650001-23700000_Seq_42_876-905	GCGTCGTTATGGTGCAACGTGTTCACCGGAATACTTCTGAGCTTATTTCAGATAGTCAGTGCTCTCAGACGTTCACCGGAATACTTCTGAGTTCACCGGAATACTTCTGACGACACCGAACGTGCGACAA
4359_chr15:23650001-23700000_Seq_45_936-965	GCGTCGTTATGGTGCAACGTGTTCACCGGAATACTTCTGATTTACAAATTACTTGTGAGCAAAATTCACCGTTCACCGGAATACTTCTGAGTTCACCGGAATACTTCTGACGACACCGAACGTGCGACAA
4362_chr15:23650001-23700000_Seq_48_996-1025	GCGTCGTTATGGTGCAACGTGTTCACCGGAATACTTCTGAGAAAACTGACTGCCTTAATCACAGCAAAACGTTCACCGGAATACTTCTGAGTTCACCGGAATACTTCTGACGACACCGAACGTGCGACAA
4365_chr15:23650001-23700000_Seq_51_1056-1085	GCGTCGTTATGGTGCAACGTGTTCACCGGAATACTTCTGAAGACCACAAGTGTTGGGTCTTCCCAAATCAGTTCACCGGAATACTTCTGAGTTCACCGGAATACTTCTGACGACACCGAACGTGCGACAA
4368_chr15:23650001-23700000_Seq_54_1116-1145	GCGTCGTTATGGTGCAACGTGTTCACCGGAATACTTCTGACCTCTTTCCCTTTCTGTGCATATGTTCTTCGTTCACCGGAATACTTCTGAGTTCACCGGAATACTTCTGACGACACCGAACGTGCGACAA
4371_chr15:23650001-23700000_Seq_57_1177-1206	GCGTCGTTATGGTGCAACGTGTTCACCGGAATACTTCTGAAAATTCCCTTTCCTCACTTTTATATGAAACGTTCACCGGAATACTTCTGAGTTCACCGGAATACTTCTGACGACACCGAACGTGCGACAA
4374_chr15:23650001-23700000_Seq_60_1237-1266	GCGTCGTTATGGTGCAACGTGTTCACCGGAATACTTCTGAAAAGGGAAAAACATACAAAACATCCATGAAGTTCACCGGAATACTTCTGAGTTCACCGGAATACTTCTGACGACACCGAACGTGCGACAA
4377_chr15:23650001-23700000_Seq_63_1297-1326	GCGTCGTTATGGTGCAACGTGTTCACCGGAATACTTCTGAACTTTTAATGGCTTACGTCAGTATATAACAGTTCACCGGAATACTTCTGAGTTCACCGGAATACTTCTGACGACACCGAACGTGCGACAA
4380_chr15:23650001-23700000_Seq_66_1373-1402	GCGTCGTTATGGTGCAACGTGTTCACCGGAATACTTCTGATATTGTGATGGGAGTAGGAAAATTGCGGAAGTTCACCGGAATACTTCTGAGTTCACCGGAATACTTCTGACGACACCGAACGTGCGACAA
4382_chr15:23650001-23700000_Seq_68_1413-1442	GCGTCGTTATGGTGCAACGTGTTCACCGGAATACTTCTGAACGGGAGCCTGTTTTGCTCACCTTGGTATCGTTCACCGGAATACTTCTGAGTTCACCGGAATACTTCTGACGACACCGAACGTGCGACAA
4385_chr15:23650001-23700000_Seq_71_1473-1502	GCGTCGTTATGGTGCAACGTGTTCACCGGAATACTTCTGACTACAAAATGAAATGGTAAGATTAGCACCAGTTCACCGGAATACTTCTGAGTTCACCGGAATACTTCTGACGACACCGAACGTGCGACAA
4388_chr15:23650001-23700000_Seq_74_1615-1644	GCGTCGTTATGGTGCAACGTGTTCACCGGAATACTTCTGAataccttttattaagcattcactatatgccGTTCACCGGAATACTTCTGAGTTCACCGGAATACTTCTGACGACACCGAACGTGCGACAA
4391_chr15:23650001-23700000_Seq_77_1675-1704	GCGTCGTTATGGTGCAACGTGTTCACCGGAATACTTCTGAAAAAATCTGATGCAAGTCCTATTTACATCTGTTCACCGGAATACTTCTGAGTTCACCGGAATACTTCTGACGACACCGAACGTGCGACAA
4394_chr15:23650001-23700000_Seq_80_1735-1764	GCGTCGTTATGGTGCAACGTGTTCACCGGAATACTTCTGATCTATCGTTAGTCACATAGGGACATTTCACGTTCACCGGAATACTTCTGAGTTCACCGGAATACTTCTGACGACACCGAACGTGCGACAA
4397_chr15:23650001-23700000_Seq_83_1822-1851	GCGTCGTTATGGTGCAACGTGTTCACCGGAATACTTCTGATGTCGCATTGTTTAAACCTCATATTGGTCAGTTCACCGGAATACTTCTGAGTTCACCGGAATACTTCTGACGACACCGAACGTGCGACAA
4400_chr15:23650001-23700000_Seq_86_1886-1915	GCGTCGTTATGGTGCAACGTGTTCACCGGAATACTTCTGATTGGAACATGGGGTGAGGGGAGCTGTGATGGTTCACCGGAATACTTCTGAGTTCACCGGAATACTTCTGACGACACCGAACGTGCGACAA
4403_chr15:23650001-23700000_Seq_89_1946-1975	GCGTCGTTATGGTGCAACGTGTTCACCGGAATACTTCTGAAACCTGAGGCTGTGAAAGATTCATGTGATCGTTCACCGGAATACTTCTGAGTTCACCGGAATACTTCTGACGACACCGAACGTGCGACAA
4406_chr15:23650001-23700000_Seq_92_2051-2080	GCGTCGTTATGGTGCAACGTGTTCACCGGAATACTTCTGAGAATTGGAAGGATTAAAATAGTGTAACTACGTTCACCGGAATACTTCTGAGTTCACCGGAATACTTCTGACGACACCGAACGTGCGACAA
4409_chr15:23650001-23700000_Seq_95_2151-2180	GCGTCGTTATGGTGCAACGTGTTCACCGGAATACTTCTGATCACAAAATCCATAAGTATTTGGCTTGATTGTTCACCGGAATACTTCTGAGTTCACCGGAATACTTCTGACGACACCGAACGTGCGACAA
4412_chr15:23650001-23700000_Seq_98_2221-2250	GCGTCGTTATGGTGCAACGTGTTCACCGGAATACTTCTGACATATCAGAATTCAGATTTAAATCCCAATCGTTCACCGGAATACTTCTGAGTTCACCGGAATACTTCTGACGACACCGAACGTGCGACAA
4415_chr15:23650001-23700000_Seq_101_2299-2328	GCGTCGTTATGGTGCAACGTGTTCACCGGAATACTTCTGAcaccaggcagggtcttgctctctcacccagGTTCACCGGAATACTTCTGAGTTCACCGGAATACTTCTGACGACACCGAACGTGCGACAA
4418_chr15:23650001-23700000_Seq_108_2439-2468	GCGTCGTTATGGTGCAACGTGTTCACCGGAATACTTCTGAacacgcaggtgatttttgttcgtttgttttGTTCACCGGAATACTTCTGAGTTCACCGGAATACTTCTGACGACACCGAACGTGCGACAA
4421_chr15:23650001-23700000_Seq_112_2519-2548	GCGTCGTTATGGTGCAACGTGTTCACCGGAATACTTCTGAgggttaagtgagcccccaaccttggcctccGTTCACCGGAATACTTCTGAGTTCACCGGAATACTTCTGACGACACCGAACGTGCGACAA
4424_chr15:23650001-23700000_Seq_116_2599-2628	GCGTCGTTATGGTGCAACGTGTTCACCGGAATACTTCTGATACCATTACACCAGGGCTGCCAAAACCTTTGTTCACCGGAATACTTCTGAGTTCACCGGAATACTTCTGACGACACCGAACGTGCGACAA
4427_chr15:23650001-23700000_Seq_119_2677-2706	GCGTCGTTATGGTGCAACGTGTTCACCGGAATACTTCTGAagtattcaatttaatgagctttgccactgaGTTCACCGGAATACTTCTGAGTTCACCGGAATACTTCTGACGACACCGAACGTGCGACAA
4430_chr15:23650001-23700000_Seq_122_2758-2787	GCGTCGTTATGGTGCAACGTGTTCACCGGAATACTTCTGAtaccgtgcacccttttccagtcaattattcGTTCACCGGAATACTTCTGAGTTCACCGGAATACTTCTGACGACACCGAACGTGCGACAA
4433_chr15:23650001-23700000_Seq_125_2821-2850	GCGTCGTTATGGTGCAACGTGTTCACCGGAATACTTCTGAcaccctagattattttgcctgttctaaaaaGTTCACCGGAATACTTCTGAGTTCACCGGAATACTTCTGACGACACCGAACGTGCGACAA
4436_chr15:23650001-23700000_Seq_129_2901-2930	GCGTCGTTATGGTGCAACGTGTTCACCGGAATACTTCTGAacacacagatagaggtcaatattcctttgtGTTCACCGGAATACTTCTGAGTTCACCGGAATACTTCTGACGACACCGAACGTGCGACAA
4439_chr15:23650001-23700000_Seq_132_3030-3059	GCGTCGTTATGGTGCAACGTGTTCACCGGAATACTTCTGAttacctgttggcatgtgagacatttaaaatGTTCACCGGAATACTTCTGAGTTCACCGGAATACTTCTGACGACACCGAACGTGCGACAA
4442_chr15:23650001-23700000_Seq_135_3099-3128	GCGTCGTTATGGTGCAACGTGTTCACCGGAATACTTCTGAtttacaagccttttgtaaatatatgcttccGTTCACCGGAATACTTCTGAGTTCACCGGAATACTTCTGACGACACCGAACGTGCGACAA
4445_chr15:23650001-23700000_Seq_138_3159-3188	GCGTCGTTATGGTGCAACGTGTTCACCGGAATACTTCTGAatgtctgggtcataggatagacggctgtttGTTCACCGGAATACTTCTGAGTTCACCGGAATACTTCTGACGACACCGAACGTGCGACAA
4448_chr15:23650001-23700000_Seq_141_3219-3248	GCGTCGTTATGGTGCAACGTGTTCACCGGAATACTTCTGAggttagaccattttacactctaacataagaGTTCACCGGAATACTTCTGAGTTCACCGGAATACTTCTGACGACACCGAACGTGCGACAA
4450_chr15:23650001-23700000_Seq_143_3273-3302	GCGTCGTTATGGTGCAACGTGTTCACCGGAATACTTCTGAtacgaattccaggtacttgacaaccttgcaGTTCACCGGAATACTTCTGAGTTCACCGGAATACTTCTGACGACACCGAACGTGCGACAA
4453_chr15:23650001-23700000_Seq_146_3348-3377	GCGTCGTTATGGTGCAACGTGTTCACCGGAATACTTCTGAatgtgaaatggtgattgcagttttacactgGTTCACCGGAATACTTCTGAGTTCACCGGAATACTTCTGACGACACCGAACGTGCGACAA
4456_chr15:23650001-23700000_Seq_149_3408-3437	GCGTCGTTATGGTGCAACGTGTTCACCGGAATACTTCTGAccacatcattgcaaaattgatacagtcagtGTTCACCGGAATACTTCTGAGTTCACCGGAATACTTCTGACGACACCGAACGTGCGACAA
4459_chr15:23650001-23700000_Seq_152_3468-3497	GCGTCGTTATGGTGCAACGTGTTCACCGGAATACTTCTGATTTAGGCAGTTCAGTAAATGAGAAATGGTAGTTCACCGGAATACTTCTGAGTTCACCGGAATACTTCTGACGACACCGAACGTGCGACAA
4462_chr15:23650001-23700000_Seq_156_3598-3627	GCGTCGTTATGGTGCAACGTGTTCACCGGAATACTTCTGAgagacttctcatgtatcccctctcctctccGTTCACCGGAATACTTCTGAGTTCACCGGAATACTTCTGACGACACCGAACGTGCGACAA
4465_chr15:23650001-23700000_Seq_159_3658-3687	GCGTCGTTATGGTGCAACGTGTTCACCGGAATACTTCTGAgccccttatttttaatgtcttgcgttagagGTTCACCGGAATACTTCTGAGTTCACCGGAATACTTCTGACGACACCGAACGTGCGACAA
4468_chr15:23650001-23700000_Seq_162_3719-3748	GCGTCGTTATGGTGCAACGTGTTCACCGGAATACTTCTGAtcattaattgaactccctagtttacattagGTTCACCGGAATACTTCTGAGTTCACCGGAATACTTCTGACGACACCGAACGTGCGACAA
4471_chr15:23650001-23700000_Seq_165_3803-3832	GCGTCGTTATGGTGCAACGTGTTCACCGGAATACTTCTGAgggttatcacaattgtgtgataacagatttGTTCACCGGAATACTTCTGAGTTCACCGGAATACTTCTGACGACACCGAACGTGCGACAA
4474_chr15:23650001-23700000_Seq_168_3879-3908	GCGTCGTTATGGTGCAACGTGTTCACCGGAATACTTCTGAaaaaacctgtgctttctcctaccaaaccccGTTCACCGGAATACTTCTGAGTTCACCGGAATACTTCTGACGACACCGAACGTGCGACAA
4477_chr15:23650001-23700000_Seq_175_4045-4074	GCGTCGTTATGGTGCAACGTGTTCACCGGAATACTTCTGAttgtggcctggtaactcatgtttttctTCTGTTCACCGGAATACTTCTGAGTTCACCGGAATACTTCTGACGACACCGAACGTGCGACAA
4480_chr15:23650001-23700000_Seq_179_4132-4161	GCGTCGTTATGGTGCAACGTGTTCACCGGAATACTTCTGAaactacagcaagtttccatacaccccttggGTTCACCGGAATACTTCTGAGTTCACCGGAATACTTCTGACGACACCGAACGTGCGACAA
4483_chr15:23650001-23700000_Seq_182_4192-4221	GCGTCGTTATGGTGCAACGTGTTCACCGGAATACTTCTGAtgtcaacgtcctccagcaaaattgtatgctGTTCACCGGAATACTTCTGAGTTCACCGGAATACTTCTGACGACACCGAACGTGCGACAA
4486_chr15:23650001-23700000_Seq_186_4272-4301	GCGTCGTTATGGTGCAACGTGTTCACCGGAATACTTCTGAgagttcacattaagtttcctcttggtattgGTTCACCGGAATACTTCTGAGTTCACCGGAATACTTCTGACGACACCGAACGTGCGACAA
4489_chr15:23650001-23700000_Seq_190_4352-4381	GCGTCGTTATGGTGCAACGTGTTCACCGGAATACTTCTGAtataacacgggatagtttcctagctcccaaGTTCACCGGAATACTTCTGAGTTCACCGGAATACTTCTGACGACACCGAACGTGCGACAA
4492_chr15:23650001-23700000_Seq_193_4412-4441	GCGTCGTTATGGTGCAACGTGTTCACCGGAATACTTCTGAccctcccctgcagatacctggcaaccactgGTTCACCGGAATACTTCTGAGTTCACCGGAATACTTCTGACGACACCGAACGTGCGACAA
4495_chr15:23650001-23700000_Seq_203_4654-4683	GCGTCGTTATGGTGCAACGTGTTCACCGGAATACTTCTGAtgatgaaggacaccctggttgctgccaagaGTTCACCGGAATACTTCTGAGTTCACCGGAATACTTCTGACGACACCGAACGTGCGACAA
4498_chr15:23650001-23700000_Seq_210_4823-4852	GCGTCGTTATGGTGCAACGTGTTCACCGGAATACTTCTGAgggttcacaccattctcttccctcggcctcGTTCACCGGAATACTTCTGAGTTCACCGGAATACTTCTGACGACACCGAACGTGCGACAA
4501_chr15:23650001-23700000_Seq_219_5021-5050	GCGTCGTTATGGTGCAACGTGTTCACCGGAATACTTCTGAgcgcctggcctattctgtacatttttctagGTTCACCGGAATACTTCTGAGTTCACCGGAATACTTCTGACGACACCGAACGTGCGACAA
4504_chr15:23650001-23700000_Seq_222_5160-5189	GCGTCGTTATGGTGCAACGTGTTCACCGGAATACTTCTGActcttagccctattatagcagcatcttacaGTTCACCGGAATACTTCTGAGTTCACCGGAATACTTCTGACGACACCGAACGTGCGACAA
4507_chr15:23650001-23700000_Seq_240_5665-5694	GCGTCGTTATGGTGCAACGTGTTCACCGGAATACTTCTGAgagtatgcccgattcggcttgaataattttGTTCACCGGAATACTTCTGAGTTCACCGGAATACTTCTGACGACACCGAACGTGCGACAA
4510_chr15:23650001-23700000_Seq_243_5730-5759	GCGTCGTTATGGTGCAACGTGTTCACCGGAATACTTCTGActgtttaaaatattctgtgagcacttgaaaGTTCACCGGAATACTTCTGAGTTCACCGGAATACTTCTGACGACACCGAACGTGCGACAA
4513_chr15:23650001-23700000_Seq_246_5790-5819	GCGTCGTTATGGTGCAACGTGTTCACCGGAATACTTCTGAtctataaatgtcgcctaggtctagttggttGTTCACCGGAATACTTCTGAGTTCACCGGAATACTTCTGACGACACCGAACGTGCGACAA
4516_chr15:23650001-23700000_Seq_249_5862-5891	GCGTCGTTATGGTGCAACGTGTTCACCGGAATACTTCTGAaatctggtccttctatcaatcactcaaagaGTTCACCGGAATACTTCTGAGTTCACCGGAATACTTCTGACGACACCGAACGTGCGACAA
4518_chr15:23650001-23700000_Seq_251_5902-5931	GCGTCGTTATGGTGCAACGTGTTCACCGGAATACTTCTGAcatttccaaacacagttgtagacttatctaGTTCACCGGAATACTTCTGAGTTCACCGGAATACTTCTGACGACACCGAACGTGCGACAA
4521_chr15:23650001-23700000_Seq_254_5963-5992	GCGTCGTTATGGTGCAACGTGTTCACCGGAATACTTCTGAgtgttatctcttttattaggtcatacacatGTTCACCGGAATACTTCTGAGTTCACCGGAATACTTCTGACGACACCGAACGTGCGACAA
4524_chr15:23650001-23700000_Seq_257_6023-6052	GCGTCGTTATGGTGCAACGTGTTCACCGGAATACTTCTGAtggttcttcattctcacaaaatatctccctGTTCACCGGAATACTTCTGAGTTCACCGGAATACTTCTGACGACACCGAACGTGCGACAA
4527_chr15:23650001-23700000_Seq_260_6083-6112	GCGTCGTTATGGTGCAACGTGTTCACCGGAATACTTCTGActactttgtctaatactagcagagccacccGTTCACCGGAATACTTCTGAGTTCACCGGAATACTTCTGACGACACCGAACGTGCGACAA
4530_chr15:23650001-23700000_Seq_263_6144-6173	GCGTCGTTATGGTGCAACGTGTTCACCGGAATACTTCTGAtgtttatttgcatccttttaactatcaaccGTTCACCGGAATACTTCTGAGTTCACCGGAATACTTCTGACGACACCGAACGTGCGACAA
4533_chr15:23650001-23700000_Seq_269_6282-6311	GCGTCGTTATGGTGCAACGTGTTCACCGGAATACTTCTGActacaccgtgagactcagcaagctggaatcGTTCACCGGAATACTTCTGAGTTCACCGGAATACTTCTGACGACACCGAACGTGCGACAA
4536_chr15:23650001-23700000_Seq_272_6342-6371	GCGTCGTTATGGTGCAACGTGTTCACCGGAATACTTCTGAgtgcccaagagctaagaacttggaaggctgGTTCACCGGAATACTTCTGAGTTCACCGGAATACTTCTGACGACACCGAACGTGCGACAA
4539_chr15:23650001-23700000_Seq_275_6415-6444	GCGTCGTTATGGTGCAACGTGTTCACCGGAATACTTCTGAaaaaagtcaatatgtcagttccaatccaaaGTTCACCGGAATACTTCTGAGTTCACCGGAATACTTCTGACGACACCGAACGTGCGACAA
4542_chr15:23650001-23700000_Seq_278_6475-6504	GCGTCGTTATGGTGCAACGTGTTCACCGGAATACTTCTGAaggacattaggcaTCTgaaatatcctttcaGTTCACCGGAATACTTCTGAGTTCACCGGAATACTTCTGACGACACCGAACGTGCGACAA
4545_chr15:23650001-23700000_Seq_282_6574-6603	GCGTCGTTATGGTGCAACGTGTTCACCGGAATACTTCTGAtcatcgcaCTGAGGTTATAATTTTTAAATCGTTCACCGGAATACTTCTGAGTTCACCGGAATACTTCTGACGACACCGAACGTGCGACAA
4548_chr15:23650001-23700000_Seq_286_6668-6697	GCGTCGTTATGGTGCAACGTGTTCACCGGAATACTTCTGAaagttgactgtattggtacttcttttatctGTTCACCGGAATACTTCTGAGTTCACCGGAATACTTCTGACGACACCGAACGTGCGACAA
4551_chr15:23650001-23700000_Seq_290_6819-6848	GCGTCGTTATGGTGCAACGTGTTCACCGGAATACTTCTGAatacatatttaatttagtgctgtctacctcGTTCACCGGAATACTTCTGAGTTCACCGGAATACTTCTGACGACACCGAACGTGCGACAA
4554_chr15:23650001-23700000_Seq_293_6895-6924	GCGTCGTTATGGTGCAACGTGTTCACCGGAATACTTCTGAccagttaaacttcttacaactgttgtgttcGTTCACCGGAATACTTCTGAGTTCACCGGAATACTTCTGACGACACCGAACGTGCGACAA
4557_chr15:23650001-23700000_Seq_296_6979-7008	GCGTCGTTATGGTGCAACGTGTTCACCGGAATACTTCTGAtattccttttactttaaatagccagtgagcGTTCACCGGAATACTTCTGAGTTCACCGGAATACTTCTGACGACACCGAACGTGCGACAA
4560_chr15:23650001-23700000_Seq_300_7095-7124	GCGTCGTTATGGTGCAACGTGTTCACCGGAATACTTCTGAtatctatGTCTATGAAGTCCTTGCTTTAAAGTTCACCGGAATACTTCTGAGTTCACCGGAATACTTCTGACGACACCGAACGTGCGACAA
4563_chr15:23650001-23700000_Seq_303_7169-7198	GCGTCGTTATGGTGCAACGTGTTCACCGGAATACTTCTGAACTTACTTTGCACAATTCTGTGGTAGCTGAGTTCACCGGAATACTTCTGAGTTCACCGGAATACTTCTGACGACACCGAACGTGCGACAA
4566_chr15:23650001-23700000_Seq_306_7229-7258	GCGTCGTTATGGTGCAACGTGTTCACCGGAATACTTCTGATGCAGTCAACACACTATTGCGCAAAATGAGGTTCACCGGAATACTTCTGAGTTCACCGGAATACTTCTGACGACACCGAACGTGCGACAA
4569_chr15:23650001-23700000_Seq_309_7386-7415	GCGTCGTTATGGTGCAACGTGTTCACCGGAATACTTCTGAataCCTTCtcattaagcaaaatttactgagGTTCACCGGAATACTTCTGAGTTCACCGGAATACTTCTGACGACACCGAACGTGCGACAA
4572_chr15:23650001-23700000_Seq_312_7446-7475	GCGTCGTTATGGTGCAACGTGTTCACCGGAATACTTCTGAttctggaaatacatcattgaagcatacaggGTTCACCGGAATACTTCTGAGTTCACCGGAATACTTCTGACGACACCGAACGTGCGACAA
4575_chr15:23650001-23700000_Seq_315_7506-7535	GCGTCGTTATGGTGCAACGTGTTCACCGGAATACTTCTGAtctagtatagggagagagacaataagtataGTTCACCGGAATACTTCTGAGTTCACCGGAATACTTCTGACGACACCGAACGTGCGACAA
4578_chr15:23650001-23700000_Seq_318_7567-7596	GCGTCGTTATGGTGCAACGTGTTCACCGGAATACTTCTGAatgaaagctatggagataaagaaacaggaaGTTCACCGGAATACTTCTGAGTTCACCGGAATACTTCTGACGACACCGAACGTGCGACAA
4581_chr15:23650001-23700000_Seq_321_7627-7656	GCGTCGTTATGGTGCAACGTGTTCACCGGAATACTTCTGAgtcttgaaggagaggcaggctAGATGCAACGTTCACCGGAATACTTCTGAGTTCACCGGAATACTTCTGACGACACCGAACGTGCGACAA
4583_chr15:23650001-23700000_Seq_323_7667-7696	GCGTCGTTATGGTGCAACGTGTTCACCGGAATACTTCTGAATGGAGGGATATATTTTAGCATATGGCAAAGTTCACCGGAATACTTCTGAGTTCACCGGAATACTTCTGACGACACCGAACGTGCGACAA
4586_chr15:23650001-23700000_Seq_326_7727-7756	GCGTCGTTATGGTGCAACGTGTTCACCGGAATACTTCTGAAAAGGCATTAGTGACTAGGAACCCATTTCAGTTCACCGGAATACTTCTGAGTTCACCGGAATACTTCTGACGACACCGAACGTGCGACAA
4589_chr15:23650001-23700000_Seq_329_7787-7816	GCGTCGTTATGGTGCAACGTGTTCACCGGAATACTTCTGAAGATTCACTGGGCAATGACTAGCACCTGGCGTTCACCGGAATACTTCTGAGTTCACCGGAATACTTCTGACGACACCGAACGTGCGACAA
4592_chr15:23650001-23700000_Seq_332_7847-7876	GCGTCGTTATGGTGCAACGTGTTCACCGGAATACTTCTGACATCCAAAGCAGAAGTGAAGTAAGCAAAGTGTTCACCGGAATACTTCTGAGTTCACCGGAATACTTCTGACGACACCGAACGTGCGACAA
4595_chr15:23650001-23700000_Seq_335_7909-7938	GCGTCGTTATGGTGCAACGTGTTCACCGGAATACTTCTGATGATAAACTGGGTCCCAGCACTCTATTCACGTTCACCGGAATACTTCTGAGTTCACCGGAATACTTCTGACGACACCGAACGTGCGACAA
4598_chr15:23650001-23700000_Seq_338_7969-7998	GCGTCGTTATGGTGCAACGTGTTCACCGGAATACTTCTGAAGTGGTGGATTATCTCTAGATCCTACTCACGTTCACCGGAATACTTCTGAGTTCACCGGAATACTTCTGACGACACCGAACGTGCGACAA
4601_chr15:23650001-23700000_Seq_341_8029-8058	GCGTCGTTATGGTGCAACGTGTTCACCGGAATACTTCTGATGGAGGCTTTGTATAATAGACAATCAGAAAGTTCACCGGAATACTTCTGAGTTCACCGGAATACTTCTGACGACACCGAACGTGCGACAA
4604_chr15:23650001-23700000_Seq_344_8089-8118	GCGTCGTTATGGTGCAACGTGTTCACCGGAATACTTCTGACTGGGTACTCAGTGTTCTTTCTGGCAGTTTGTTCACCGGAATACTTCTGAGTTCACCGGAATACTTCTGACGACACCGAACGTGCGACAA
4607_chr15:23650001-23700000_Seq_348_8175-8204	GCGTCGTTATGGTGCAACGTGTTCACCGGAATACTTCTGACATACTGTGCTTTTAAGAAGATAATTAGACGTTCACCGGAATACTTCTGAGTTCACCGGAATACTTCTGACGACACCGAACGTGCGACAA
4610_chr15:23650001-23700000_Seq_351_8242-8271	GCGTCGTTATGGTGCAACGTGTTCACCGGAATACTTCTGAATTAAATAATTGTAAATGCCTACTAGTGGCGTTCACCGGAATACTTCTGAGTTCACCGGAATACTTCTGACGACACCGAACGTGCGACAA
4613_chr15:23650001-23700000_Seq_355_8322-8351	GCGTCGTTATGGTGCAACGTGTTCACCGGAATACTTCTGATGTActttctggctcccttcataccttctgGTTCACCGGAATACTTCTGAGTTCACCGGAATACTTCTGACGACACCGAACGTGCGACAA
4616_chr15:23650001-23700000_Seq_358_8382-8411	GCGTCGTTATGGTGCAACGTGTTCACCGGAATACTTCTGActttcagcctgaaaaactttccttagcattGTTCACCGGAATACTTCTGAGTTCACCGGAATACTTCTGACGACACCGAACGTGCGACAA
4619_chr15:23650001-23700000_Seq_361_8442-8471	GCGTCGTTATGGTGCAACGTGTTCACCGGAATACTTCTGAcccctcagtctttgtctgatgatgactttaGTTCACCGGAATACTTCTGAGTTCACCGGAATACTTCTGACGACACCGAACGTGCGACAA
4622_chr15:23650001-23700000_Seq_365_8561-8590	GCGTCGTTATGGTGCAACGTGTTCACCGGAATACTTCTGAtggaacagaatgaataacacacaaattaacGTTCACCGGAATACTTCTGAGTTCACCGGAATACTTCTGACGACACCGAACGTGCGACAA
4625_chr15:23650001-23700000_Seq_368_8621-8650	GCGTCGTTATGGTGCAACGTGTTCACCGGAATACTTCTGAaaaggtaccaaaatatacaatgaggaatggGTTCACCGGAATACTTCTGAGTTCACCGGAATACTTCTGACGACACCGAACGTGCGACAA
4628_chr15:23650001-23700000_Seq_371_8681-8710	GCGTCGTTATGGTGCAACGTGTTCACCGGAATACTTCTGAactggatatccttgtgcaaataaatgaaatGTTCACCGGAATACTTCTGAGTTCACCGGAATACTTCTGACGACACCGAACGTGCGACAA
4631_chr15:23650001-23700000_Seq_374_8768-8797	GCGTCGTTATGGTGCAACGTGTTCACCGGAATACTTCTGAacgtaagacctggaaatataaaactactagGTTCACCGGAATACTTCTGAGTTCACCGGAATACTTCTGACGACACCGAACGTGCGACAA
4634_chr15:23650001-23700000_Seq_377_8845-8874	GCGTCGTTATGGTGCAACGTGTTCACCGGAATACTTCTGAtttttggataagcctcaaaagcacaagcaaGTTCACCGGAATACTTCTGAGTTCACCGGAATACTTCTGACGACACCGAACGTGCGACAA
4637_chr15:23650001-23700000_Seq_384_8999-9028	GCGTCGTTATGGTGCAACGTGTTCACCGGAATACTTCTGAtgacaagaggttaatatccagaacttataaGTTCACCGGAATACTTCTGAGTTCACCGGAATACTTCTGACGACACCGAACGTGCGACAA
4640_chr15:23650001-23700000_Seq_398_9348-9377	GCGTCGTTATGGTGCAACGTGTTCACCGGAATACTTCTGAaaacctcaaacaattgaatagcaaaaatccGTTCACCGGAATACTTCTGAGTTCACCGGAATACTTCTGACGACACCGAACGTGCGACAA
4643_chr15:23650001-23700000_Seq_403_9461-9490	GCGTCGTTATGGTGCAACGTGTTCACCGGAATACTTCTGAaaaagtgcttgacatcattaaccatcagggGTTCACCGGAATACTTCTGAGTTCACCGGAATACTTCTGACGACACCGAACGTGCGACAA
4646_chr15:23650001-23700000_Seq_409_9606-9635	GCGTCGTTATGGTGCAACGTGTTCACCGGAATACTTCTGAagggatgtgtagaaaagaaaaccattacatGTTCACCGGAATACTTCTGAGTTCACCGGAATACTTCTGACGACACCGAACGTGCGACAA
4649_chr15:23650001-23700000_Seq_412_9726-9755	GCGTCGTTATGGTGCAACGTGTTCACCGGAATACTTCTGAtagtaaatccactactaagcgtatgtttaaGTTCACCGGAATACTTCTGAGTTCACCGGAATACTTCTGACGACACCGAACGTGCGACAA
4651_chr15:23650001-23700000_Seq_418_9876-9905	GCGTCGTTATGGTGCAACGTGTTCACCGGAATACTTCTGAtgtgtttatatacacagctgaatactattcGTTCACCGGAATACTTCTGAGTTCACCGGAATACTTCTGACGACACCGAACGTGCGACAA
4654_chr15:23650001-23700000_Seq_427_10057-10086	GCGTCGTTATGGTGCAACGTGTTCACCGGAATACTTCTGAtagaatggtgattatcagaggctagagtggGTTCACCGGAATACTTCTGAGTTCACCGGAATACTTCTGACGACACCGAACGTGCGACAA
4657_chr15:23650001-23700000_Seq_433_10177-10206	GCGTCGTTATGGTGCAACGTGTTCACCGGAATACTTCTGAaaaatggtgactacagttaatggtgatataGTTCACCGGAATACTTCTGAGTTCACCGGAATACTTCTGACGACACCGAACGTGCGACAA
4660_chr15:23650001-23700000_Seq_437_10269-10298	GCGTCGTTATGGTGCAACGTGTTCACCGGAATACTTCTGActatgtgagataatgcatttctttattagcGTTCACCGGAATACTTCTGAGTTCACCGGAATACTTCTGACGACACCGAACGTGCGACAA
4663_chr15:23650001-23700000_Seq_441_10349-10378	GCGTCGTTATGGTGCAACGTGTTCACCGGAATACTTCTGAaaacaaaacagtatgctgtgtaggataaacGTTCACCGGAATACTTCTGAGTTCACCGGAATACTTCTGACGACACCGAACGTGCGACAA
4666_chr15:23650001-23700000_Seq_444_10463-10492	GCGTCGTTATGGTGCAACGTGTTCACCGGAATACTTCTGAgacatcattattctttgtttcactgtattgGTTCACCGGAATACTTCTGAGTTCACCGGAATACTTCTGACGACACCGAACGTGCGACAA
4669_chr15:23650001-23700000_Seq_448_10543-10572	GCGTCGTTATGGTGCAACGTGTTCACCGGAATACTTCTGAgcagttggacaaaaataagcaaaagcgcgaGTTCACCGGAATACTTCTGAGTTCACCGGAATACTTCTGACGACACCGAACGTGCGACAA
4672_chr15:23650001-23700000_Seq_451_10603-10632	GCGTCGTTATGGTGCAACGTGTTCACCGGAATACTTCTGAactgagcgtattgggtaggtaggataatacGTTCACCGGAATACTTCTGAGTTCACCGGAATACTTCTGACGACACCGAACGTGCGACAA
4675_chr15:23650001-23700000_Seq_454_10670-10699	GCGTCGTTATGGTGCAACGTGTTCACCGGAATACTTCTGAtgcaaagaattcttctcgcttattttctctGTTCACCGGAATACTTCTGAGTTCACCGGAATACTTCTGACGACACCGAACGTGCGACAA
4678_chr15:23650001-23700000_Seq_457_10733-10762	GCGTCGTTATGGTGCAACGTGTTCACCGGAATACTTCTGAtatgactatatttttaaattgcctcatggcGTTCACCGGAATACTTCTGAGTTCACCGGAATACTTCTGACGACACCGAACGTGCGACAA
4681_chr15:23650001-23700000_Seq_461_10813-10842	GCGTCGTTATGGTGCAACGTGTTCACCGGAATACTTCTGAgatgcttttcattctgccttcatgttccctGTTCACCGGAATACTTCTGAGTTCACCGGAATACTTCTGACGACACCGAACGTGCGACAA
4684_chr15:23650001-23700000_Seq_464_10873-10902	GCGTCGTTATGGTGCAACGTGTTCACCGGAATACTTCTGAgctatgaagcctattgaatgaattagtcatGTTCACCGGAATACTTCTGAGTTCACCGGAATACTTCTGACGACACCGAACGTGCGACAA
4687_chr15:23650001-23700000_Seq_467_10968-10997	GCGTCGTTATGGTGCAACGTGTTCACCGGAATACTTCTGAaatcctcatttgctcatgtatcttgtctacGTTCACCGGAATACTTCTGAGTTCACCGGAATACTTCTGACGACACCGAACGTGCGACAA
4690_chr15:23650001-23700000_Seq_470_11046-11075	GCGTCGTTATGGTGCAACGTGTTCACCGGAATACTTCTGAtttccttgccaattcacacattgagattacGTTCACCGGAATACTTCTGAGTTCACCGGAATACTTCTGACGACACCGAACGTGCGACAA
4693_chr15:23650001-23700000_Seq_474_11160-11189	GCGTCGTTATGGTGCAACGTGTTCACCGGAATACTTCTGAtatcaggagataatgtgtatgaacaaatagGTTCACCGGAATACTTCTGAGTTCACCGGAATACTTCTGACGACACCGAACGTGCGACAA
4696_chr15:23650001-23700000_Seq_477_11220-11249	GCGTCGTTATGGTGCAACGTGTTCACCGGAATACTTCTGAaaaagtgcaagctttcttctatcagaccaaGTTCACCGGAATACTTCTGAGTTCACCGGAATACTTCTGACGACACCGAACGTGCGACAA
4699_chr15:23650001-23700000_Seq_480_11302-11331	GCGTCGTTATGGTGCAACGTGTTCACCGGAATACTTCTGATTTTTGCAAGTATACTTAGATTCAGCTCCAGTTCACCGGAATACTTCTGAGTTCACCGGAATACTTCTGACGACACCGAACGTGCGACAA
4702_chr15:23650001-23700000_Seq_483_11362-11391	GCGTCGTTATGGTGCAACGTGTTCACCGGAATACTTCTGAGAGGAAGACATTCCTTTAAGCGGAGCTTCAGTTCACCGGAATACTTCTGAGTTCACCGGAATACTTCTGACGACACCGAACGTGCGACAA
4705_chr15:23650001-23700000_Seq_486_11422-11451	GCGTCGTTATGGTGCAACGTGTTCACCGGAATACTTCTGACTGTATGCATTAGCCCCAGCGGCTTGTTTTGTTCACCGGAATACTTCTGAGTTCACCGGAATACTTCTGACGACACCGAACGTGCGACAA
4708_chr15:23650001-23700000_Seq_489_11482-11511	GCGTCGTTATGGTGCAACGTGTTCACCGGAATACTTCTGACTCTGTGTTTTGCTGTCCTCTCCTTTCTCCGTTCACCGGAATACTTCTGAGTTCACCGGAATACTTCTGACGACACCGAACGTGCGACAA
4711_chr15:23650001-23700000_Seq_493_11583-11612	GCGTCGTTATGGTGCAACGTGTTCACCGGAATACTTCTGATTTCTTTACTCTCCAGCTCTTTTCCTGGCTGTTCACCGGAATACTTCTGAGTTCACCGGAATACTTCTGACGACACCGAACGTGCGACAA
4714_chr15:23650001-23700000_Seq_496_11643-11672	GCGTCGTTATGGTGCAACGTGTTCACCGGAATACTTCTGATCCTAATTCTCTGCCTCTAGTCTTTGTCGGGTTCACCGGAATACTTCTGAGTTCACCGGAATACTTCTGACGACACCGAACGTGCGACAA
4717_chr15:23650001-23700000_Seq_499_11703-11732	GCGTCGTTATGGTGCAACGTGTTCACCGGAATACTTCTGATGCACCCTGGGAGGATTGCTTCAGTTCTCTGTTCACCGGAATACTTCTGAGTTCACCGGAATACTTCTGACGACACCGAACGTGCGACAA
4719_chr15:23650001-23700000_Seq_501_11743-11772	GCGTCGTTATGGTGCAACGTGTTCACCGGAATACTTCTGAAAAATCCCTACGGGCTGCCACCTTGCACTTGTTCACCGGAATACTTCTGAGTTCACCGGAATACTTCTGACGACACCGAACGTGCGACAA
4722_chr15:23650001-23700000_Seq_504_11803-11832	GCGTCGTTATGGTGCAACGTGTTCACCGGAATACTTCTGATCTCAGCGTCCTGTATCATGGCAGCCTTCCGTTCACCGGAATACTTCTGAGTTCACCGGAATACTTCTGACGACACCGAACGTGCGACAA
4725_chr15:23650001-23700000_Seq_507_11863-11892	GCGTCGTTATGGTGCAACGTGTTCACCGGAATACTTCTGATCCATGACTCTTCACCTCCCCAGCCCTGCTGTTCACCGGAATACTTCTGAGTTCACCGGAATACTTCTGACGACACCGAACGTGCGACAA
4728_chr15:23650001-23700000_Seq_510_11923-11952	GCGTCGTTATGGTGCAACGTGTTCACCGGAATACTTCTGATTAGTGAAAGCCCTGAAGGAGTGATTTGGCGTTCACCGGAATACTTCTGAGTTCACCGGAATACTTCTGACGACACCGAACGTGCGACAA
4731_chr15:23650001-23700000_Seq_513_11983-12012	GCGTCGTTATGGTGCAACGTGTTCACCGGAATACTTCTGAGTAATTCTAATCTGTCATGCTAAATAACACGTTCACCGGAATACTTCTGAGTTCACCGGAATACTTCTGACGACACCGAACGTGCGACAA
4734_chr15:23650001-23700000_Seq_516_12052-12081	GCGTCGTTATGGTGCAACGTGTTCACCGGAATACTTCTGACAATGGAGCCATCCATGGTGAGTAGATTCCGTTCACCGGAATACTTCTGAGTTCACCGGAATACTTCTGACGACACCGAACGTGCGACAA
4737_chr15:23650001-23700000_Seq_519_12112-12141	GCGTCGTTATGGTGCAACGTGTTCACCGGAATACTTCTGAAGTAGCAACAAGGCTCTTTGCTGTCTGATAGTTCACCGGAATACTTCTGAGTTCACCGGAATACTTCTGACGACACCGAACGTGCGACAA
4740_chr15:23650001-23700000_Seq_522_12195-12224	GCGTCGTTATGGTGCAACGTGTTCACCGGAATACTTCTGACAACCCAGAagtcctttccaaaccttttatGTTCACCGGAATACTTCTGAGTTCACCGGAATACTTCTGACGACACCGAACGTGCGACAA
4743_chr15:23650001-23700000_Seq_525_12255-12284	GCGTCGTTATGGTGCAACGTGTTCACCGGAATACTTCTGAcatcactgtgaaatagaactggagataccaGTTCACCGGAATACTTCTGAGTTCACCGGAATACTTCTGACGACACCGAACGTGCGACAA
4746_chr15:23650001-23700000_Seq_528_12334-12363	GCGTCGTTATGGTGCAACGTGTTCACCGGAATACTTCTGAatattaaaagtttacccaaagtggacattcGTTCACCGGAATACTTCTGAGTTCACCGGAATACTTCTGACGACACCGAACGTGCGACAA
4749_chr15:23650001-23700000_Seq_531_12459-12488	GCGTCGTTATGGTGCAACGTGTTCACCGGAATACTTCTGAAAAAACACTTTGATTAACTCTGCTACACTCGTTCACCGGAATACTTCTGAGTTCACCGGAATACTTCTGACGACACCGAACGTGCGACAA
4752_chr15:23650001-23700000_Seq_534_12519-12548	GCGTCGTTATGGTGCAACGTGTTCACCGGAATACTTCTGACCCCAAGTTGTGAAACGCTTAGGGCAGCACGTTCACCGGAATACTTCTGAGTTCACCGGAATACTTCTGACGACACCGAACGTGCGACAA
4755_chr15:23650001-23700000_Seq_537_12579-12608	GCGTCGTTATGGTGCAACGTGTTCACCGGAATACTTCTGATTGTTACTGCCAGTACAGAAAATCACTAAGGTTCACCGGAATACTTCTGAGTTCACCGGAATACTTCTGACGACACCGAACGTGCGACAA
4758_chr15:23650001-23700000_Seq_540_12639-12668	GCGTCGTTATGGTGCAACGTGTTCACCGGAATACTTCTGAGAGGGAGCAATTGGAAGGATATTTGGATGAGTTCACCGGAATACTTCTGAGTTCACCGGAATACTTCTGACGACACCGAACGTGCGACAA
4761_chr15:23650001-23700000_Seq_543_12699-12728	GCGTCGTTATGGTGCAACGTGTTCACCGGAATACTTCTGATGTGATGTGGTGGTGGAAGAGTTGTATTTTGTTCACCGGAATACTTCTGAGTTCACCGGAATACTTCTGACGACACCGAACGTGCGACAA
4764_chr15:23650001-23700000_Seq_546_12768-12797	GCGTCGTTATGGTGCAACGTGTTCACCGGAATACTTCTGAGGAACCACCTATGAACAGTAAAAGGACAAAGTTCACCGGAATACTTCTGAGTTCACCGGAATACTTCTGACGACACCGAACGTGCGACAA
4767_chr15:23650001-23700000_Seq_549_12828-12857	GCGTCGTTATGGTGCAACGTGTTCACCGGAATACTTCTGATTTCCTCATGAAATAGGACAGGGTGAGCTTGTTCACCGGAATACTTCTGAGTTCACCGGAATACTTCTGACGACACCGAACGTGCGACAA
4770_chr15:23650001-23700000_Seq_552_12888-12917	GCGTCGTTATGGTGCAACGTGTTCACCGGAATACTTCTGAGTTGGGAAGAGGATGCAGATTTGACTAGGGGTTCACCGGAATACTTCTGAGTTCACCGGAATACTTCTGACGACACCGAACGTGCGACAA
4773_chr15:23650001-23700000_Seq_555_12948-12977	GCGTCGTTATGGTGCAACGTGTTCACCGGAATACTTCTGAAGTACACAAATGTGCAGAAGTTTTGATCCCGTTCACCGGAATACTTCTGAGTTCACCGGAATACTTCTGACGACACCGAACGTGCGACAA
4776_chr15:23650001-23700000_Seq_558_13008-13037	GCGTCGTTATGGTGCAACGTGTTCACCGGAATACTTCTGAACTCATTGGAGCTTGGGATTTGTTATATGCGTTCACCGGAATACTTCTGAGTTCACCGGAATACTTCTGACGACACCGAACGTGCGACAA
4779_chr15:23650001-23700000_Seq_561_13068-13097	GCGTCGTTATGGTGCAACGTGTTCACCGGAATACTTCTGAGAGGAAGGGTGCATAGAGCATACCACTTAAGTTCACCGGAATACTTCTGAGTTCACCGGAATACTTCTGACGACACCGAACGTGCGACAA
4782_chr15:23650001-23700000_Seq_564_13128-13157	GCGTCGTTATGGTGCAACGTGTTCACCGGAATACTTCTGATTAGCTCTTCCTTTCCACACCCAATCttgtGTTCACCGGAATACTTCTGAGTTCACCGGAATACTTCTGACGACACCGAACGTGCGACAA
4785_chr15:23650001-23700000_Seq_567_13214-13243	GCGTCGTTATGGTGCAACGTGTTCACCGGAATACTTCTGAGTATTCTCAGGCCTGCTTCTCACTATCTGCGTTCACCGGAATACTTCTGAGTTCACCGGAATACTTCTGACGACACCGAACGTGCGACAA
4787_chr15:23650001-23700000_Seq_569_13254-13283	GCGTCGTTATGGTGCAACGTGTTCACCGGAATACTTCTGAATTGTTAAGGACATCCTTGGGCTTAGCTATGTTCACCGGAATACTTCTGAGTTCACCGGAATACTTCTGACGACACCGAACGTGCGACAA
4790_chr15:23650001-23700000_Seq_572_13314-13343	GCGTCGTTATGGTGCAACGTGTTCACCGGAATACTTCTGACCCACATTCTTTGGTTCTGTCATGAGCATCGTTCACCGGAATACTTCTGAGTTCACCGGAATACTTCTGACGACACCGAACGTGCGACAA
4793_chr15:23650001-23700000_Seq_575_13374-13403	GCGTCGTTATGGTGCAACGTGTTCACCGGAATACTTCTGATTCTGGAGAACCACGCATCTGATGGGAAGGGTTCACCGGAATACTTCTGAGTTCACCGGAATACTTCTGACGACACCGAACGTGCGACAA
4796_chr15:23650001-23700000_Seq_578_13434-13463	GCGTCGTTATGGTGCAACGTGTTCACCGGAATACTTCTGAGTTCAGCCACACCCTTCACTAACAGCCTGGGTTCACCGGAATACTTCTGAGTTCACCGGAATACTTCTGACGACACCGAACGTGCGACAA
4799_chr15:23650001-23700000_Seq_581_13494-13523	GCGTCGTTATGGTGCAACGTGTTCACCGGAATACTTCTGAGGAGGGTTTTGGGGTTGAGGTTCCTCTTGTGTTCACCGGAATACTTCTGAGTTCACCGGAATACTTCTGACGACACCGAACGTGCGACAA
4802_chr15:23650001-23700000_Seq_584_13554-13583	GCGTCGTTATGGTGCAACGTGTTCACCGGAATACTTCTGAGCATTGACAACAGCTCTACTGAGCTCCCTCGTTCACCGGAATACTTCTGAGTTCACCGGAATACTTCTGACGACACCGAACGTGCGACAA
4805_chr15:23650001-23700000_Seq_587_13614-13643	GCGTCGTTATGGTGCAACGTGTTCACCGGAATACTTCTGAGGTGCCCATGAGAATGCATCTTCCAAGTACGTTCACCGGAATACTTCTGAGTTCACCGGAATACTTCTGACGACACCGAACGTGCGACAA
4808_chr15:23650001-23700000_Seq_590_13674-13703	GCGTCGTTATGGTGCAACGTGTTCACCGGAATACTTCTGAAGGGGAGTGGACAGAGCAGTATCACCTGCAGTTCACCGGAATACTTCTGAGTTCACCGGAATACTTCTGACGACACCGAACGTGCGACAA
4811_chr15:23650001-23700000_Seq_593_13753-13782	GCGTCGTTATGGTGCAACGTGTTCACCGGAATACTTCTGACAAGTAATAAAATAAACATGGAATGGAAGCGTTCACCGGAATACTTCTGAGTTCACCGGAATACTTCTGACGACACCGAACGTGCGACAA
4814_chr15:23650001-23700000_Seq_596_13813-13842	GCGTCGTTATGGTGCAACGTGTTCACCGGAATACTTCTGAAGCCATATCGGCTGGGGAGAAGGACGTGACGTTCACCGGAATACTTCTGAGTTCACCGGAATACTTCTGACGACACCGAACGTGCGACAA
4817_chr15:23650001-23700000_Seq_599_13873-13902	GCGTCGTTATGGTGCAACGTGTTCACCGGAATACTTCTGAcctcacccaattccatccacatgggtctccGTTCACCGGAATACTTCTGAGTTCACCGGAATACTTCTGACGACACCGAACGTGCGACAA
4820_chr15:23650001-23700000_Seq_602_13933-13962	GCGTCGTTATGGTGCAACGTGTTCACCGGAATACTTCTGAggacaattgcagaggcaatgtcctctgttcGTTCACCGGAATACTTCTGAGTTCACCGGAATACTTCTGACGACACCGAACGTGCGACAA
4823_chr15:23650001-23700000_Seq_605_13993-14022	GCGTCGTTATGGTGCAACGTGTTCACCGGAATACTTCTGAgtgtggctcactccctcgtgtctttcagggGTTCACCGGAATACTTCTGAGTTCACCGGAATACTTCTGACGACACCGAACGTGCGACAA
4826_chr15:23650001-23700000_Seq_609_14073-14102	GCGTCGTTATGGTGCAACGTGTTCACCGGAATACTTCTGAaatgttagtcccttattctactctaagactGTTCACCGGAATACTTCTGAGTTCACCGGAATACTTCTGACGACACCGAACGTGCGACAA
4829_chr15:23650001-23700000_Seq_612_14145-14174	GCGTCGTTATGGTGCAACGTGTTCACCGGAATACTTCTGAtatcttctcccactagactctatggtccatGTTCACCGGAATACTTCTGAGTTCACCGGAATACTTCTGACGACACCGAACGTGCGACAA
4832_chr15:23650001-23700000_Seq_615_14205-14234	GCGTCGTTATGGTGCAACGTGTTCACCGGAATACTTCTGAtgctgtagcgcatgtttctagaacaaatatGTTCACCGGAATACTTCTGAGTTCACCGGAATACTTCTGACGACACCGAACGTGCGACAA
4835_chr15:23650001-23700000_Seq_618_14289-14318	GCGTCGTTATGGTGCAACGTGTTCACCGGAATACTTCTGAAAGCACACACACAAAAAGAAAACACACCAAGTTCACCGGAATACTTCTGAGTTCACCGGAATACTTCTGACGACACCGAACGTGCGACAA
4838_chr15:23650001-23700000_Seq_621_14349-14378	GCGTCGTTATGGTGCAACGTGTTCACCGGAATACTTCTGACAAGTGGGTTCTCTTTACACCTTTCAGAATGTTCACCGGAATACTTCTGAGTTCACCGGAATACTTCTGACGACACCGAACGTGCGACAA
4841_chr15:23650001-23700000_Seq_624_14431-14460	GCGTCGTTATGGTGCAACGTGTTCACCGGAATACTTCTGAttggatgaaaaatcccagtgaggtcattaaGTTCACCGGAATACTTCTGAGTTCACCGGAATACTTCTGACGACACCGAACGTGCGACAA
4844_chr15:23650001-23700000_Seq_627_14502-14531	GCGTCGTTATGGTGCAACGTGTTCACCGGAATACTTCTGAttcagtttcctcctctataaaatgctggtaGTTCACCGGAATACTTCTGAGTTCACCGGAATACTTCTGACGACACCGAACGTGCGACAA
4847_chr15:23650001-23700000_Seq_630_14562-14591	GCGTCGTTATGGTGCAACGTGTTCACCGGAATACTTCTGAgatcacatATTAAGTGTTTTGTAAGCATGAGTTCACCGGAATACTTCTGAGTTCACCGGAATACTTCTGACGACACCGAACGTGCGACAA
4850_chr15:23650001-23700000_Seq_633_14644-14673	GCGTCGTTATGGTGCAACGTGTTCACCGGAATACTTCTGAATGATTTTACAGACTTATAAAAGTGCATCCGTTCACCGGAATACTTCTGAGTTCACCGGAATACTTCTGACGACACCGAACGTGCGACAA
4852_chr15:23650001-23700000_Seq_635_14719-14748	GCGTCGTTATGGTGCAACGTGTTCACCGGAATACTTCTGATGTTGGATTTTAGTTTTCTCACATTATCTGGTTCACCGGAATACTTCTGAGTTCACCGGAATACTTCTGACGACACCGAACGTGCGACAA
4855_chr15:23650001-23700000_Seq_638_14807-14836	GCGTCGTTATGGTGCAACGTGTTCACCGGAATACTTCTGAAAAAATGTAGTTCTggccgggcacgatggcGTTCACCGGAATACTTCTGAGTTCACCGGAATACTTCTGACGACACCGAACGTGCGACAA
4858_chr15:23650001-23700000_Seq_644_14936-14965	GCGTCGTTATGGTGCAACGTGTTCACCGGAATACTTCTGAaaaaatacaaaaataaactggacatggtggGTTCACCGGAATACTTCTGAGTTCACCGGAATACTTCTGACGACACCGAACGTGCGACAA
4861_chr15:23650001-23700000_Seq_667_15460-15489	GCGTCGTTATGGTGCAACGTGTTCACCGGAATACTTCTGAtgcaataattttagacttacatggaagttgGTTCACCGGAATACTTCTGAGTTCACCGGAATACTTCTGACGACACCGAACGTGCGACAA
4864_chr15:23650001-23700000_Seq_670_15531-15560	GCGTCGTTATGGTGCAACGTGTTCACCGGAATACTTCTGAttcttccagtgatgctaacttacataagcaGTTCACCGGAATACTTCTGAGTTCACCGGAATACTTCTGACGACACCGAACGTGCGACAA
4867_chr15:23650001-23700000_Seq_673_15634-15663	GCGTCGTTATGGTGCAACGTGTTCACCGGAATACTTCTGAttttgccagttttgaaatgcactcatttctGTTCACCGGAATACTTCTGAGTTCACCGGAATACTTCTGACGACACCGAACGTGCGACAA
4870_chr15:23650001-23700000_Seq_676_15704-15733	GCGTCGTTATGGTGCAACGTGTTCACCGGAATACTTCTGAttgtgtaaccatcaacataggatacagagcGTTCACCGGAATACTTCTGAGTTCACCGGAATACTTCTGACGACACCGAACGTGCGACAA
4873_chr15:23650001-23700000_Seq_679_15764-15793	GCGTCGTTATGGTGCAACGTGTTCACCGGAATACTTCTGAaccccttttcagtcacagctgcccactaatGTTCACCGGAATACTTCTGAGTTCACCGGAATACTTCTGACGACACCGAACGTGCGACAA
4876_chr15:23650001-23700000_Seq_682_15871-15900	GCGTCGTTATGGTGCAACGTGTTCACCGGAATACTTCTGAgtatgcaaccctttgatatttcttttgctcGTTCACCGGAATACTTCTGAGTTCACCGGAATACTTCTGACGACACCGAACGTGCGACAA
4879_chr15:23650001-23700000_Seq_685_15931-15960	GCGTCGTTATGGTGCAACGTGTTCACCGGAATACTTCTGAcaagttgctatgtgtaacaatatttagttcGTTCACCGGAATACTTCTGAGTTCACCGGAATACTTCTGACGACACCGAACGTGCGACAA
4882_chr15:23650001-23700000_Seq_688_16002-16031	GCGTCGTTATGGTGCAACGTGTTCACCGGAATACTTCTGAcagtttatccatttgcatgttggaaaatatGTTCACCGGAATACTTCTGAGTTCACCGGAATACTTCTGACGACACCGAACGTGCGACAA
4885_chr15:23650001-23700000_Seq_691_16063-16092	GCGTCGTTATGGTGCAACGTGTTCACCGGAATACTTCTGAcgtagttttggtatgaacatatgcctttatGTTCACCGGAATACTTCTGAGTTCACCGGAATACTTCTGACGACACCGAACGTGCGACAA
4888_chr15:23650001-23700000_Seq_694_16125-16154	GCGTCGTTATGGTGCAACGTGTTCACCGGAATACTTCTGAttgggttacgcttaaggatgtgataactttGTTCACCGGAATACTTCTGAGTTCACCGGAATACTTCTGACGACACCGAACGTGCGACAA
4891_chr15:23650001-23700000_Seq_698_16205-16234	GCGTCGTTATGGTGCAACGTGTTCACCGGAATACTTCTGAttcccctggcactatgtgagagttccacttGTTCACCGGAATACTTCTGAGTTCACCGGAATACTTCTGACGACACCGAACGTGCGACAA
4894_chr15:23650001-23700000_Seq_715_16588-16617	GCGTCGTTATGGTGCAACGTGTTCACCGGAATACTTCTGAcccagccgacagtatattttcttttgtcatGTTCACCGGAATACTTCTGAGTTCACCGGAATACTTCTGACGACACCGAACGTGCGACAA
4897_chr15:23650001-23700000_Seq_719_16722-16751	GCGTCGTTATGGTGCAACGTGTTCACCGGAATACTTCTGAtttttgttgtttatgtgtttgccttccatcGTTCACCGGAATACTTCTGAGTTCACCGGAATACTTCTGACGACACCGAACGTGCGACAA
4900_chr15:23650001-23700000_Seq_723_16843-16872	GCGTCGTTATGGTGCAACGTGTTCACCGGAATACTTCTGAccttctgtggacttgtggtttgcaaatacaGTTCACCGGAATACTTCTGAGTTCACCGGAATACTTCTGACGACACCGAACGTGCGACAA
4903_chr15:23650001-23700000_Seq_726_16903-16932	GCGTCGTTATGGTGCAACGTGTTCACCGGAATACTTCTGAaacagtgacttcggcagggcgtggtggctcGTTCACCGGAATACTTCTGAGTTCACCGGAATACTTCTGACGACACCGAACGTGCGACAA
4906_chr15:23650001-23700000_Seq_741_17277-17306	GCGTCGTTATGGTGCAACGTGTTCACCGGAATACTTCTGAttgttgaggtcaaattgatccgttctttctGTTCACCGGAATACTTCTGAGTTCACCGGAATACTTCTGACGACACCGAACGTGCGACAA
4909_chr15:23650001-23700000_Seq_744_17337-17366	GCGTCGTTATGGTGCAACGTGTTCACCGGAATACTTCTGAtctctgcatctaacaccattttatgacaatGTTCACCGGAATACTTCTGAGTTCACCGGAATACTTCTGACGACACCGAACGTGCGACAA
4912_chr15:23650001-23700000_Seq_748_17453-17482	GCGTCGTTATGGTGCAACGTGTTCACCGGAATACTTCTGAaagtgtggggtttatgttgaaggtttggggGTTCACCGGAATACTTCTGAGTTCACCGGAATACTTCTGACGACACCGAACGTGCGACAA
4915_chr15:23650001-23700000_Seq_752_17533-17562	GCGTCGTTATGGTGCAACGTGTTCACCGGAATACTTCTGAaggctatccttccattgaattacttttgcaGTTCACCGGAATACTTCTGAGTTCACCGGAATACTTCTGACGACACCGAACGTGCGACAA
4918_chr15:23650001-23700000_Seq_757_17633-17662	GCGTCGTTATGGTGCAACGTGTTCACCGGAATACTTCTGActatgtgtctatccctctgctaaataccacGTTCACCGGAATACTTCTGAGTTCACCGGAATACTTCTGACGACACCGAACGTGCGACAA
4920_chr15:23650001-23700000_Seq_759_17673-17702	GCGTCGTTATGGTGCAACGTGTTCACCGGAATACTTCTGAgctgaattgtgccttaagccttaaaattggGTTCACCGGAATACTTCTGAGTTCACCGGAATACTTCTGACGACACCGAACGTGCGACAA
4923_chr15:23650001-23700000_Seq_763_17826-17855	GCGTCGTTATGGTGCAACGTGTTCACCGGAATACTTCTGATTTAGAGTTAACCCAGACAGAataaatcatGTTCACCGGAATACTTCTGAGTTCACCGGAATACTTCTGACGACACCGAACGTGCGACAA
4926_chr15:23650001-23700000_Seq_768_18050-18079	GCGTCGTTATGGTGCAACGTGTTCACCGGAATACTTCTGAcatgggtcactgcatcctcaacctcccaggGTTCACCGGAATACTTCTGAGTTCACCGGAATACTTCTGACGACACCGAACGTGCGACAA
4929_chr15:23650001-23700000_Seq_772_18130-18159	GCGTCGTTATGGTGCAACGTGTTCACCGGAATACTTCTGAtgtgccaccacacttagttaattttaaaatGTTCACCGGAATACTTCTGAGTTCACCGGAATACTTCTGACGACACCGAACGTGCGACAA
4932_chr15:23650001-23700000_Seq_778_18276-18305	GCGTCGTTATGGTGCAACGTGTTCACCGGAATACTTCTGACAGTGCTAATTAGTAGTAATTAATGATAGGGTTCACCGGAATACTTCTGAGTTCACCGGAATACTTCTGACGACACCGAACGTGCGACAA
4935_chr15:23650001-23700000_Seq_781_18504-18533	GCGTCGTTATGGTGCAACGTGTTCACCGGAATACTTCTGAAGTAAGAATGACATTTTTATTTCTGTCCAGGTTCACCGGAATACTTCTGAGTTCACCGGAATACTTCTGACGACACCGAACGTGCGACAA
4938_chr15:23650001-23700000_Seq_784_18592-18621	GCGTCGTTATGGTGCAACGTGTTCACCGGAATACTTCTGACTATACTGCCTACAGCCTTCATGATATCTTGTTCACCGGAATACTTCTGAGTTCACCGGAATACTTCTGACGACACCGAACGTGCGACAA
4941_chr15:23650001-23700000_Seq_787_18669-18698	GCGTCGTTATGGTGCAACGTGTTCACCGGAATACTTCTGATTCACTTTGACTTGCTGCTCTGTTCTCATCGTTCACCGGAATACTTCTGAGTTCACCGGAATACTTCTGACGACACCGAACGTGCGACAA
4944_chr15:23650001-23700000_Seq_790_18747-18776	GCGTCGTTATGGTGCAACGTGTTCACCGGAATACTTCTGAGCTAAATATGTTTACAAAAAGAGTGTTTGGGTTCACCGGAATACTTCTGAGTTCACCGGAATACTTCTGACGACACCGAACGTGCGACAA
4947_chr15:23650001-23700000_Seq_793_18807-18836	GCGTCGTTATGGTGCAACGTGTTCACCGGAATACTTCTGACAGCAGCAGAGTTTTGAATTTGACCAAATTGTTCACCGGAATACTTCTGAGTTCACCGGAATACTTCTGACGACACCGAACGTGCGACAA
4950_chr15:23650001-23700000_Seq_797_18913-18942	GCGTCGTTATGGTGCAACGTGTTCACCGGAATACTTCTGAAGATCATTTGCATCTAGAGATCCATCATATGTTCACCGGAATACTTCTGAGTTCACCGGAATACTTCTGACGACACCGAACGTGCGACAA
4953_chr15:23650001-23700000_Seq_800_18982-19011	GCGTCGTTATGGTGCAACGTGTTCACCGGAATACTTCTGATTCATAAGTGTATTGGATGCTATCATAAGTGTTCACCGGAATACTTCTGAGTTCACCGGAATACTTCTGACGACACCGAACGTGCGACAA
4956_chr15:23650001-23700000_Seq_803_19042-19071	GCGTCGTTATGGTGCAACGTGTTCACCGGAATACTTCTGAAGCACAGAGGTAATTTGAAGTTGTGAAATCGTTCACCGGAATACTTCTGAGTTCACCGGAATACTTCTGACGACACCGAACGTGCGACAA
4959_chr15:23650001-23700000_Seq_819_19411-19440	GCGTCGTTATGGTGCAACGTGTTCACCGGAATACTTCTGAcatctcagagaaaGTTCTATTTAACTTAGCGTTCACCGGAATACTTCTGAGTTCACCGGAATACTTCTGACGACACCGAACGTGCGACAA
4962_chr15:23650001-23700000_Seq_822_19471-19500	GCGTCGTTATGGTGCAACGTGTTCACCGGAATACTTCTGACTGAAATAGTATCATTTCCCTAAAACATGAGTTCACCGGAATACTTCTGAGTTCACCGGAATACTTCTGACGACACCGAACGTGCGACAA
4965_chr15:23650001-23700000_Seq_825_19531-19560	GCGTCGTTATGGTGCAACGTGTTCACCGGAATACTTCTGATAGTTTTTGTTGCAACCAGAACACAACATCGTTCACCGGAATACTTCTGAGTTCACCGGAATACTTCTGACGACACCGAACGTGCGACAA
4968_chr15:23650001-23700000_Seq_828_19591-19620	GCGTCGTTATGGTGCAACGTGTTCACCGGAATACTTCTGATTCTAGGCTCCATATGACCTCTTCAAAGATGTTCACCGGAATACTTCTGAGTTCACCGGAATACTTCTGACGACACCGAACGTGCGACAA
4971_chr15:23650001-23700000_Seq_831_19659-19688	GCGTCGTTATGGTGCAACGTGTTCACCGGAATACTTCTGATGCATTTTTCTCCCCTTCTCTTTATTCTCAGTTCACCGGAATACTTCTGAGTTCACCGGAATACTTCTGACGACACCGAACGTGCGACAA
4974_chr15:23650001-23700000_Seq_834_19726-19755	GCGTCGTTATGGTGCAACGTGTTCACCGGAATACTTCTGACTTTCATACTCTGAAAACATGATTTTATGGGTTCACCGGAATACTTCTGAGTTCACCGGAATACTTCTGACGACACCGAACGTGCGACAA
4977_chr15:23650001-23700000_Seq_837_19786-19815	GCGTCGTTATGGTGCAACGTGTTCACCGGAATACTTCTGACTGGCCGCAATGCAAGCTGTCTTGTGGGCAGTTCACCGGAATACTTCTGAGTTCACCGGAATACTTCTGACGACACCGAACGTGCGACAA
4980_chr15:23650001-23700000_Seq_840_19846-19875	GCGTCGTTATGGTGCAACGTGTTCACCGGAATACTTCTGACCATAAAGCCGAAGTTATGATTCTTGTTTCGTTCACCGGAATACTTCTGAGTTCACCGGAATACTTCTGACGACACCGAACGTGCGACAA
4983_chr15:23650001-23700000_Seq_843_19936-19965	GCGTCGTTATGGTGCAACGTGTTCACCGGAATACTTCTGAACAAGTAAGCACACCAGGCCCCTTTTTAGCGTTCACCGGAATACTTCTGAGTTCACCGGAATACTTCTGACGACACCGAACGTGCGACAA
4986_chr15:23650001-23700000_Seq_846_20007-20036	GCGTCGTTATGGTGCAACGTGTTCACCGGAATACTTCTGATCTTTTCTTTGATAAGAAGTTCATAGACTGGTTCACCGGAATACTTCTGAGTTCACCGGAATACTTCTGACGACACCGAACGTGCGACAA
4988_chr15:23650001-23700000_Seq_848_20047-20076	GCGTCGTTATGGTGCAACGTGTTCACCGGAATACTTCTGAGGCAAATTTACATTTGTGCTGTCTGCCAGAGTTCACCGGAATACTTCTGAGTTCACCGGAATACTTCTGACGACACCGAACGTGCGACAA
4991_chr15:23650001-23700000_Seq_851_20130-20159	GCGTCGTTATGGTGCAACGTGTTCACCGGAATACTTCTGACTTTTGTTTCATGTTTTCTGTGGTTTAATGGTTCACCGGAATACTTCTGAGTTCACCGGAATACTTCTGACGACACCGAACGTGCGACAA
4994_chr15:23650001-23700000_Seq_854_20239-20268	GCGTCGTTATGGTGCAACGTGTTCACCGGAATACTTCTGATTTTTGGTTATCATTATTTGACGCATCACTGTTCACCGGAATACTTCTGAGTTCACCGGAATACTTCTGACGACACCGAACGTGCGACAA
4997_chr15:23650001-23700000_Seq_857_20299-20328	GCGTCGTTATGGTGCAACGTGTTCACCGGAATACTTCTGAAAGACTTGTCAGAGTCAGCTCTACACTGTAGTTCACCGGAATACTTCTGAGTTCACCGGAATACTTCTGACGACACCGAACGTGCGACAA
5000_chr15:23650001-23700000_Seq_860_20370-20399	GCGTCGTTATGGTGCAACGTGTTCACCGGAATACTTCTGAGTTGAAAGACATTTTCAATGCAACTTGTAGGTTCACCGGAATACTTCTGAGTTCACCGGAATACTTCTGACGACACCGAACGTGCGACAA
5003_chr15:23650001-23700000_Seq_864_20484-20513	GCGTCGTTATGGTGCAACGTGTTCACCGGAATACTTCTGAGAATATCCACTTCTAGTTACTCTGCACTTTGTTCACCGGAATACTTCTGAGTTCACCGGAATACTTCTGACGACACCGAACGTGCGACAA
5006_chr15:23650001-23700000_Seq_868_20564-20593	GCGTCGTTATGGTGCAACGTGTTCACCGGAATACTTCTGATAGGCATCTTTATTAACTGTGAACCTCATAGTTCACCGGAATACTTCTGAGTTCACCGGAATACTTCTGACGACACCGAACGTGCGACAA
5009_chr15:23650001-23700000_Seq_872_20689-20718	GCGTCGTTATGGTGCAACGTGTTCACCGGAATACTTCTGATGTGTGCTGGTTTGTTTGGTATACCAAAGGGTTCACCGGAATACTTCTGAGTTCACCGGAATACTTCTGACGACACCGAACGTGCGACAA
5012_chr15:23650001-23700000_Seq_875_20749-20778	GCGTCGTTATGGTGCAACGTGTTCACCGGAATACTTCTGAATCAGTGTTTGTTTAGGAGACCAAAAATCCGTTCACCGGAATACTTCTGAGTTCACCGGAATACTTCTGACGACACCGAACGTGCGACAA
5015_chr15:23650001-23700000_Seq_878_20861-20890	GCGTCGTTATGGTGCAACGTGTTCACCGGAATACTTCTGACCTTAAATGGTAAAATTTAGTCTTcacacaGTTCACCGGAATACTTCTGAGTTCACCGGAATACTTCTGACGACACCGAACGTGCGACAA
5018_chr15:23650001-23700000_Seq_881_20921-20950	GCGTCGTTATGGTGCAACGTGTTCACCGGAATACTTCTGAagacagtcatctgcaccatctacaagccaaGTTCACCGGAATACTTCTGAGTTCACCGGAATACTTCTGACGACACCGAACGTGCGACAA
5021_chr15:23650001-23700000_Seq_887_21041-21070	GCGTCGTTATGGTGCAACGTGTTCACCGGAATACTTCTGActgtgaggagatagatttttgttgcttaagGTTCACCGGAATACTTCTGAGTTCACCGGAATACTTCTGACGACACCGAACGTGCGACAA
5024_chr15:23650001-23700000_Seq_892_21141-21170	GCGTCGTTATGGTGCAACGTGTTCACCGGAATACTTCTGAATACCCAGCCCCACATTATTTTTCTGCCTAGTTCACCGGAATACTTCTGAGTTCACCGGAATACTTCTGACGACACCGAACGTGCGACAA
5027_chr15:23650001-23700000_Seq_895_21201-21230	GCGTCGTTATGGTGCAACGTGTTCACCGGAATACTTCTGACCTTTGTAATACAGTTGTCTGTGTCCTTCAGTTCACCGGAATACTTCTGAGTTCACCGGAATACTTCTGACGACACCGAACGTGCGACAA
5030_chr15:23650001-23700000_Seq_898_21261-21290	GCGTCGTTATGGTGCAACGTGTTCACCGGAATACTTCTGACTTCTGGGCCTTGCTGCATTGGTATTGTAAGTTCACCGGAATACTTCTGAGTTCACCGGAATACTTCTGACGACACCGAACGTGCGACAA
5033_chr15:23650001-23700000_Seq_901_21352-21381	GCGTCGTTATGGTGCAACGTGTTCACCGGAATACTTCTGAAAACTGAACTAGCACAAAATTGATTCAAAGGTTCACCGGAATACTTCTGAGTTCACCGGAATACTTCTGACGACACCGAACGTGCGACAA
5036_chr15:23650001-23700000_Seq_904_21412-21441	GCGTCGTTATGGTGCAACGTGTTCACCGGAATACTTCTGATACAGACAAACACTCATGATTACAACATGCGTTCACCGGAATACTTCTGAGTTCACCGGAATACTTCTGACGACACCGAACGTGCGACAA
5039_chr15:23650001-23700000_Seq_907_21474-21503	GCGTCGTTATGGTGCAACGTGTTCACCGGAATACTTCTGAATGATTCACGATTTGCAGCTCACAGTAATTGTTCACCGGAATACTTCTGAGTTCACCGGAATACTTCTGACGACACCGAACGTGCGACAA
5042_chr15:23650001-23700000_Seq_910_21556-21585	GCGTCGTTATGGTGCAACGTGTTCACCGGAATACTTCTGAAAAAACAGTGACAGCAATTACAAGAAACAGGTTCACCGGAATACTTCTGAGTTCACCGGAATACTTCTGACGACACCGAACGTGCGACAA
5045_chr15:23650001-23700000_Seq_913_21616-21645	GCGTCGTTATGGTGCAACGTGTTCACCGGAATACTTCTGAAATGCATACAGCCCTTGTTTGGGTGATGCCGTTCACCGGAATACTTCTGAGTTCACCGGAATACTTCTGACGACACCGAACGTGCGACAA
5048_chr15:23650001-23700000_Seq_916_21682-21711	GCGTCGTTATGGTGCAACGTGTTCACCGGAATACTTCTGACTCATGGCCAAAAATTTGGGGTTTTTCACAGTTCACCGGAATACTTCTGAGTTCACCGGAATACTTCTGACGACACCGAACGTGCGACAA
5051_chr15:23650001-23700000_Seq_919_21742-21771	GCGTCGTTATGGTGCAACGTGTTCACCGGAATACTTCTGActtctggtgccaaaatcaagacaattccagGTTCACCGGAATACTTCTGAGTTCACCGGAATACTTCTGACGACACCGAACGTGCGACAA
5053_chr15:23650001-23700000_Seq_921_21782-21811	GCGTCGTTATGGTGCAACGTGTTCACCGGAATACTTCTGAgggattttgataaaaattgcatgaatcctaGTTCACCGGAATACTTCTGAGTTCACCGGAATACTTCTGACGACACCGAACGTGCGACAA
5056_chr15:23650001-23700000_Seq_924_21842-21871	GCGTCGTTATGGTGCAACGTGTTCACCGGAATACTTCTGAgtcttctgatctatgaacatgatatttctcGTTCACCGGAATACTTCTGAGTTCACCGGAATACTTCTGACGACACCGAACGTGCGACAA
5059_chr15:23650001-23700000_Seq_927_22004-22033	GCGTCGTTATGGTGCAACGTGTTCACCGGAATACTTCTGAgtttaaatttctgtttccaagagttattgcGTTCACCGGAATACTTCTGAGTTCACCGGAATACTTCTGACGACACCGAACGTGCGACAA
5062_chr15:23650001-23700000_Seq_930_22066-22095	GCGTCGTTATGGTGCAACGTGTTCACCGGAATACTTCTGAtgaccccgtatcttgtgacattgctaaagtGTTCACCGGAATACTTCTGAGTTCACCGGAATACTTCTGACGACACCGAACGTGCGACAA
5065_chr15:23650001-23700000_Seq_933_22140-22169	GCGTCGTTATGGTGCAACGTGTTCACCGGAATACTTCTGActctacatagacaattatgccatctgcaaaGTTCACCGGAATACTTCTGAGTTCACCGGAATACTTCTGACGACACCGAACGTGCGACAA
5068_chr15:23650001-23700000_Seq_936_22200-22229	GCGTCGTTATGGTGCAACGTGTTCACCGGAATACTTCTGActgtaagcattttacttccttttcctgtctGTTCACCGGAATACTTCTGAGTTCACCGGAATACTTCTGACGACACCGAACGTGCGACAA
5071_chr15:23650001-23700000_Seq_940_22280-22309	GCGTCGTTATGGTGCAACGTGTTCACCGGAATACTTCTGAgtggacagcatactctacccttccctccaaGTTCACCGGAATACTTCTGAGTTCACCGGAATACTTCTGACGACACCGAACGTGCGACAA
5074_chr15:23650001-23700000_Seq_943_22342-22371	GCGTCGTTATGGTGCAACGTGTTCACCGGAATACTTCTGAaaacacactaagcaatgttaactatagtagGTTCACCGGAATACTTCTGAGTTCACCGGAATACTTCTGACGACACCGAACGTGCGACAA
5077_chr15:23650001-23700000_Seq_946_22408-22437	GCGTCGTTATGGTGCAACGTGTTCACCGGAATACTTCTGAtggtaatgctcttttctgtgcctagattgcGTTCACCGGAATACTTCTGAGTTCACCGGAATACTTCTGACGACACCGAACGTGCGACAA
5080_chr15:23650001-23700000_Seq_949_22468-22497	GCGTCGTTATGGTGCAACGTGTTCACCGGAATACTTCTGAttttgtcagatgcctttcctgcatgcattgGTTCACCGGAATACTTCTGAGTTCACCGGAATACTTCTGACGACACCGAACGTGCGACAA
5083_chr15:23650001-23700000_Seq_952_22528-22557	GCGTCGTTATGGTGCAACGTGTTCACCGGAATACTTCTGAagatatgatgaatatactgagacagtcttgGTTCACCGGAATACTTCTGAGTTCACCGGAATACTTCTGACGACACCGAACGTGCGACAA
5086_chr15:23650001-23700000_Seq_955_22588-22617	GCGTCGTTATGGTGCAACGTGTTCACCGGAATACTTCTGAtggtaccttgtacatatcggtaaattaaatGTTCACCGGAATACTTCTGAGTTCACCGGAATACTTCTGACGACACCGAACGTGCGACAA
5089_chr15:23650001-23700000_Seq_958_22651-22680	GCGTCGTTATGGTGCAACGTGTTCACCGGAATACTTCTGATTCTCCTGGGAAGATCCCCTGCCTTCTCCAGTTCACCGGAATACTTCTGAGTTCACCGGAATACTTCTGACGACACCGAACGTGCGACAA
5092_chr15:23650001-23700000_Seq_961_22711-22740	GCGTCGTTATGGTGCAACGTGTTCACCGGAATACTTCTGATCTCTCATCACTTTCCTTCTCTGTCTTAAAGTTCACCGGAATACTTCTGAGTTCACCGGAATACTTCTGACGACACCGAACGTGCGACAA
5095_chr15:23650001-23700000_Seq_964_22771-22800	GCGTCGTTATGGTGCAACGTGTTCACCGGAATACTTCTGAAATAGAAGCACCATCAACTTTCTGCCACAGGTTCACCGGAATACTTCTGAGTTCACCGGAATACTTCTGACGACACCGAACGTGCGACAA
5098_chr15:23650001-23700000_Seq_967_22831-22860	GCGTCGTTATGGTGCAACGTGTTCACCGGAATACTTCTGACATACTTCTGTCTCATTCCTATGGACGATGGTTCACCGGAATACTTCTGAGTTCACCGGAATACTTCTGACGACACCGAACGTGCGACAA
5101_chr15:23650001-23700000_Seq_970_22898-22927	GCGTCGTTATGGTGCAACGTGTTCACCGGAATACTTCTGATAGATCTCGCCATGTCTTCAATACTGGTATGTTCACCGGAATACTTCTGAGTTCACCGGAATACTTCTGACGACACCGAACGTGCGACAA
5104_chr15:23650001-23700000_Seq_973_22968-22997	GCGTCGTTATGGTGCAACGTGTTCACCGGAATACTTCTGACATCCTGCTCCATACTTAATTCGCTGAAGTGTTCACCGGAATACTTCTGAGTTCACCGGAATACTTCTGACGACACCGAACGTGCGACAA
5107_chr15:23650001-23700000_Seq_976_23054-23083	GCGTCGTTATGGTGCAACGTGTTCACCGGAATACTTCTGACTCTTTATGAGTAATTTCAGTAAACACTTCGTTCACCGGAATACTTCTGAGTTCACCGGAATACTTCTGACGACACCGAACGTGCGACAA
5110_chr15:23650001-23700000_Seq_979_23117-23146	GCGTCGTTATGGTGCAACGTGTTCACCGGAATACTTCTGATTTAACAACTGACCAATCCCTCCTTTGGCAGTTCACCGGAATACTTCTGAGTTCACCGGAATACTTCTGACGACACCGAACGTGCGACAA
5113_chr15:23650001-23700000_Seq_982_23178-23207	GCGTCGTTATGGTGCAACGTGTTCACCGGAATACTTCTGAATTCCTAATCTCTTCCCACTGTTTCTTGATGTTCACCGGAATACTTCTGAGTTCACCGGAATACTTCTGACGACACCGAACGTGCGACAA
5116_chr15:23650001-23700000_Seq_985_23243-23272	GCGTCGTTATGGTGCAACGTGTTCACCGGAATACTTCTGAATATTTGTTCTCCTCAATGCTCCATCCTGCGTTCACCGGAATACTTCTGAGTTCACCGGAATACTTCTGACGACACCGAACGTGCGACAA
5119_chr15:23650001-23700000_Seq_988_23303-23332	GCGTCGTTATGGTGCAACGTGTTCACCGGAATACTTCTGAAAACTCATATGCCTTTAGGAACAAAAAGTAGTTCACCGGAATACTTCTGAGTTCACCGGAATACTTCTGACGACACCGAACGTGCGACAA
5121_chr15:23650001-23700000_Seq_990_23343-23372	GCGTCGTTATGGTGCAACGTGTTCACCGGAATACTTCTGACTGAGGATAGCTGGTGTattgcttctcggcGTTCACCGGAATACTTCTGAGTTCACCGGAATACTTCTGACGACACCGAACGTGCGACAA
5124_chr15:23650001-23700000_Seq_994_23423-23452	GCGTCGTTATGGTGCAACGTGTTCACCGGAATACTTCTGAGCAGAAGAGTGTCTGTCCTGCCTAAACTGCGTTCACCGGAATACTTCTGAGTTCACCGGAATACTTCTGACGACACCGAACGTGCGACAA
5127_chr15:23650001-23700000_Seq_997_23483-23512	GCGTCGTTATGGTGCAACGTGTTCACCGGAATACTTCTGACCATCCCTTCCCATCCATAGGTTCATGACAGTTCACCGGAATACTTCTGAGTTCACCGGAATACTTCTGACGACACCGAACGTGCGACAA
5130_chr15:23650001-23700000_Seq_1000_23543-23572	GCGTCGTTATGGTGCAACGTGTTCACCGGAATACTTCTGATCCCTAATCAAATGgacatctctgtttagaGTTCACCGGAATACTTCTGAGTTCACCGGAATACTTCTGACGACACCGAACGTGCGACAA
5133_chr15:23650001-23700000_Seq_1003_23613-23642	GCGTCGTTATGGTGCAACGTGTTCACCGGAATACTTCTGAactcatcctcctcccacgtaaatctgctttGTTCACCGGAATACTTCTGAGTTCACCGGAATACTTCTGACGACACCGAACGTGCGACAA
5136_chr15:23650001-23700000_Seq_1006_23673-23702	GCGTCGTTATGGTGCAACGTGTTCACCGGAATACTTCTGAgacacacaaaattgtgcatgtcagaaacctGTTCACCGGAATACTTCTGAGTTCACCGGAATACTTCTGACGACACCGAACGTGCGACAA
5139_chr15:23650001-23700000_Seq_1009_23734-23763	GCGTCGTTATGGTGCAACGTGTTCACCGGAATACTTCTGAttctagcatttcatcaatcatccatttttgGTTCACCGGAATACTTCTGAGTTCACCGGAATACTTCTGACGACACCGAACGTGCGACAA
5142_chr15:23650001-23700000_Seq_1012_23817-23846	GCGTCGTTATGGTGCAACGTGTTCACCGGAATACTTCTGAattcattccctagttaaagttaccattatcGTTCACCGGAATACTTCTGAGTTCACCGGAATACTTCTGACGACACCGAACGTGCGACAA
5145_chr15:23650001-23700000_Seq_1015_23877-23906	GCGTCGTTATGGTGCAACGTGTTCACCGGAATACTTCTGAATGCCTTTGAACTTAATCTCCTTTATTCCCGTTCACCGGAATACTTCTGAGTTCACCGGAATACTTCTGACGACACCGAACGTGCGACAA
5148_chr15:23650001-23700000_Seq_1018_23937-23966	GCGTCGTTATGGTGCAACGTGTTCACCGGAATACTTCTGACAAATAAACCCCTCAAATACTTCTAATAACGTTCACCGGAATACTTCTGAGTTCACCGGAATACTTCTGACGACACCGAACGTGCGACAA
5151_chr15:23650001-23700000_Seq_1021_23997-24026	GCGTCGTTATGGTGCAACGTGTTCACCGGAATACTTCTGActttggcttgaaatgctgctattttgattcGTTCACCGGAATACTTCTGAGTTCACCGGAATACTTCTGACGACACCGAACGTGCGACAA
5154_chr15:23650001-23700000_Seq_1024_24057-24086	GCGTCGTTATGGTGCAACGTGTTCACCGGAATACTTCTGAtatctcttaaccaggtactgtttttagtctGTTCACCGGAATACTTCTGAGTTCACCGGAATACTTCTGACGACACCGAACGTGCGACAA
5157_chr15:23650001-23700000_Seq_1027_24117-24146	GCGTCGTTATGGTGCAACGTGTTCACCGGAATACTTCTGATGGTAATGTCTTAGTTTCCCAGAATATCCGGTTCACCGGAATACTTCTGAGTTCACCGGAATACTTCTGACGACACCGAACGTGCGACAA
5160_chr15:23650001-23700000_Seq_1031_24197-24226	GCGTCGTTATGGTGCAACGTGTTCACCGGAATACTTCTGAAGGGCTATGATTCTCTATCTTGAGCTAGGCGTTCACCGGAATACTTCTGAGTTCACCGGAATACTTCTGACGACACCGAACGTGCGACAA
5163_chr15:23650001-23700000_Seq_1034_24257-24286	GCGTCGTTATGGTGCAACGTGTTCACCGGAATACTTCTGATTTAGGACATGTCACTGAGTGTTTGTATGAGTTCACCGGAATACTTCTGAGTTCACCGGAATACTTCTGACGACACCGAACGTGCGACAA
5166_chr15:23650001-23700000_Seq_1037_24317-24346	GCGTCGTTATGGTGCAACGTGTTCACCGGAATACTTCTGATTTCACCTCCCTTCTCCATTTCATCAAATCGTTCACCGGAATACTTCTGAGTTCACCGGAATACTTCTGACGACACCGAACGTGCGACAA
5169_chr15:23650001-23700000_Seq_1045_24489-24518	GCGTCGTTATGGTGCAACGTGTTCACCGGAATACTTCTGAggtgtgatggtgtgcttctatagtctcaacGTTCACCGGAATACTTCTGAGTTCACCGGAATACTTCTGACGACACCGAACGTGCGACAA
5172_chr15:23650001-23700000_Seq_1053_24682-24711	GCGTCGTTATGGTGCAACGTGTTCACCGGAATACTTCTGAGAGAATCCAGATCTAATCTTCCATGTCCCTGTTCACCGGAATACTTCTGAGTTCACCGGAATACTTCTGACGACACCGAACGTGCGACAA
5175_chr15:23650001-23700000_Seq_1056_24742-24771	GCGTCGTTATGGTGCAACGTGTTCACCGGAATACTTCTGACCACAAATATACCCTCCTTCATCATGTCTAGTTCACCGGAATACTTCTGAGTTCACCGGAATACTTCTGACGACACCGAACGTGCGACAA
5178_chr15:23650001-23700000_Seq_1059_24802-24831	GCGTCGTTATGGTGCAACGTGTTCACCGGAATACTTCTGACTTTGATGCTTTCCCTTCTCAATTCATTCTGTTCACCGGAATACTTCTGAGTTCACCGGAATACTTCTGACGACACCGAACGTGCGACAA
5181_chr15:23650001-23700000_Seq_1062_24862-24891	GCGTCGTTATGGTGCAACGTGTTCACCGGAATACTTCTGAGCCTAATGTCAATTAGATGAGTCTGCAAGTGTTCACCGGAATACTTCTGAGTTCACCGGAATACTTCTGACGACACCGAACGTGCGACAA
5184_chr15:23650001-23700000_Seq_1065_24922-24951	GCGTCGTTATGGTGCAACGTGTTCACCGGAATACTTCTGACAATCTGCCTGCTTACCATTGCCTACAGGGGTTCACCGGAATACTTCTGAGTTCACCGGAATACTTCTGACGACACCGAACGTGCGACAA
5187_chr15:23650001-23700000_Seq_1068_24982-25011	GCGTCGTTATGGTGCAACGTGTTCACCGGAATACTTCTGATCTGAGCCTTTCTTTCCCCTTCGCAACCCCGTTCACCGGAATACTTCTGAGTTCACCGGAATACTTCTGACGACACCGAACGTGCGACAA
5189_chr15:23650001-23700000_Seq_1070_25032-25061	GCGTCGTTATGGTGCAACGTGTTCACCGGAATACTTCTGAGTATGATTTCTTGAGCAAATAACAAAACTGGTTCACCGGAATACTTCTGAGTTCACCGGAATACTTCTGACGACACCGAACGTGCGACAA
5192_chr15:23650001-23700000_Seq_1073_25117-25146	GCGTCGTTATGGTGCAACGTGTTCACCGGAATACTTCTGATCTAAATGCCAAAGTGGTACAAACTTCAGAGTTCACCGGAATACTTCTGAGTTCACCGGAATACTTCTGACGACACCGAACGTGCGACAA
5195_chr15:23650001-23700000_Seq_1076_25177-25206	GCGTCGTTATGGTGCAACGTGTTCACCGGAATACTTCTGAATTGCCATGAAATGAATGGAAGTTCTAATCGTTCACCGGAATACTTCTGAGTTCACCGGAATACTTCTGACGACACCGAACGTGCGACAA
5198_chr15:23650001-23700000_Seq_1079_25237-25266	GCGTCGTTATGGTGCAACGTGTTCACCGGAATACTTCTGAGTTCTCATATCTGATCTAAGAACTGCAGCAGTTCACCGGAATACTTCTGAGTTCACCGGAATACTTCTGACGACACCGAACGTGCGACAA
5201_chr15:23650001-23700000_Seq_1082_25297-25326	GCGTCGTTATGGTGCAACGTGTTCACCGGAATACTTCTGACTAATCGGGGTCCACCTATGGTCAGTAATAGTTCACCGGAATACTTCTGAGTTCACCGGAATACTTCTGACGACACCGAACGTGCGACAA
5204_chr15:23650001-23700000_Seq_1085_25372-25401	GCGTCGTTATGGTGCAACGTGTTCACCGGAATACTTCTGATTTTTGGAGACTTtaccagttagggatgctGTTCACCGGAATACTTCTGAGTTCACCGGAATACTTCTGACGACACCGAACGTGCGACAA
5207_chr15:23650001-23700000_Seq_1088_25443-25472	GCGTCGTTATGGTGCAACGTGTTCACCGGAATACTTCTGActtaaagaatgagattttattctacatgccGTTCACCGGAATACTTCTGAGTTCACCGGAATACTTCTGACGACACCGAACGTGCGACAA
5210_chr15:23650001-23700000_Seq_1091_25503-25532	GCGTCGTTATGGTGCAACGTGTTCACCGGAATACTTCTGAGGTATTTGTCCAGCAGTTTGTAGATGTCAGGTTCACCGGAATACTTCTGAGTTCACCGGAATACTTCTGACGACACCGAACGTGCGACAA
5213_chr15:23650001-23700000_Seq_1094_25564-25593	GCGTCGTTATGGTGCAACGTGTTCACCGGAATACTTCTGATTTATACTGCCATCATACGAGCAACAATAGGTTCACCGGAATACTTCTGAGTTCACCGGAATACTTCTGACGACACCGAACGTGCGACAA
5216_chr15:23650001-23700000_Seq_1097_25624-25653	GCGTCGTTATGGTGCAACGTGTTCACCGGAATACTTCTGAGAGAAAAAGGATGTAGGAAGGAAAAGCACAGTTCACCGGAATACTTCTGAGTTCACCGGAATACTTCTGACGACACCGAACGTGCGACAA
5219_chr15:23650001-23700000_Seq_1100_25684-25713	GCGTCGTTATGGTGCAACGTGTTCACCGGAATACTTCTGAAACACAGCTGAAAAACCAAGAAGTTAAATAGTTCACCGGAATACTTCTGAGTTCACCGGAATACTTCTGACGACACCGAACGTGCGACAA
5222_chr15:23650001-23700000_Seq_1103_25744-25773	GCGTCGTTATGGTGCAACGTGTTCACCGGAATACTTCTGAAGACAAGAAAAGACAACTGGGTGTCACATGGTTCACCGGAATACTTCTGAGTTCACCGGAATACTTCTGACGACACCGAACGTGCGACAA
5225_chr15:23650001-23700000_Seq_1106_25804-25833	GCGTCGTTATGGTGCAACGTGTTCACCGGAATACTTCTGAATGGTAAAGGCCACCAGAAAAATCTAGGTGGTTCACCGGAATACTTCTGAGTTCACCGGAATACTTCTGACGACACCGAACGTGCGACAA
5228_chr15:23650001-23700000_Seq_1109_26136-26165	GCGTCGTTATGGTGCAACGTGTTCACCGGAATACTTCTGAGTATATATTACACACATATGTGCACATATGGTTCACCGGAATACTTCTGAGTTCACCGGAATACTTCTGACGACACCGAACGTGCGACAA
5231_chr15:23650001-23700000_Seq_1126_26647-26676	GCGTCGTTATGGTGCAACGTGTTCACCGGAATACTTCTGATTATACACATATACATATATATGAAGGCCCGTTCACCGGAATACTTCTGAGTTCACCGGAATACTTCTGACGACACCGAACGTGCGACAA
5234_chr15:23650001-23700000_Seq_1130_26772-26801	GCGTCGTTATGGTGCAACGTGTTCACCGGAATACTTCTGATTGATCTTCCCTTTGATCTTTGCTAACTCTGTTCACCGGAATACTTCTGAGTTCACCGGAATACTTCTGACGACACCGAACGTGCGACAA
5237_chr15:23650001-23700000_Seq_1133_26854-26883	GCGTCGTTATGGTGCAACGTGTTCACCGGAATACTTCTGAATTTCTTGGGCTTCCTGCCTTAGTTTGTCTGTTCACCGGAATACTTCTGAGTTCACCGGAATACTTCTGACGACACCGAACGTGCGACAA
5240_chr15:23650001-23700000_Seq_1140_27035-27064	GCGTCGTTATGGTGCAACGTGTTCACCGGAATACTTCTGAagatgtgagccactctgcctggccCATTTTGTTCACCGGAATACTTCTGAGTTCACCGGAATACTTCTGACGACACCGAACGTGCGACAA
5243_chr15:23650001-23700000_Seq_1143_27134-27163	GCGTCGTTATGGTGCAACGTGTTCACCGGAATACTTCTGATCAATGCAAAATTTATCAATAAgccaggtgGTTCACCGGAATACTTCTGAGTTCACCGGAATACTTCTGACGACACCGAACGTGCGACAA
5246_chr15:23650001-23700000_Seq_1157_27469-27498	GCGTCGTTATGGTGCAACGTGTTCACCGGAATACTTCTGAacttgaggccaagagccatcttgtttaattGTTCACCGGAATACTTCTGAGTTCACCGGAATACTTCTGACGACACCGAACGTGCGACAA
5249_chr15:23650001-23700000_Seq_1160_27529-27558	GCGTCGTTATGGTGCAACGTGTTCACCGGAATACTTCTGAcagccatatagttgaagttcaagaaatctcGTTCACCGGAATACTTCTGAGTTCACCGGAATACTTCTGACGACACCGAACGTGCGACAA
5252_chr15:23650001-23700000_Seq_1163_27635-27664	GCGTCGTTATGGTGCAACGTGTTCACCGGAATACTTCTGAGGCTAATAGAAGAGACATGAAACCGTTTAGGTTCACCGGAATACTTCTGAGTTCACCGGAATACTTCTGACGACACCGAACGTGCGACAA
5255_chr15:23650001-23700000_Seq_1166_27706-27735	GCGTCGTTATGGTGCAACGTGTTCACCGGAATACTTCTGAGAGTAGCTGAACCCAAGAATAATTGGGCAAGTTCACCGGAATACTTCTGAGTTCACCGGAATACTTCTGACGACACCGAACGTGCGACAA
5257_chr15:23650001-23700000_Seq_1168_27746-27775	GCGTCGTTATGGTGCAACGTGTTCACCGGAATACTTCTGAAAGGAGGGATGTTTTAGACCCCTCATCAGAGTTCACCGGAATACTTCTGAGTTCACCGGAATACTTCTGACGACACCGAACGTGCGACAA
5260_chr15:23650001-23700000_Seq_1171_27821-27850	GCGTCGTTATGGTGCAACGTGTTCACCGGAATACTTCTGAAAAAGAAGGCTATCCTTCAGCATGGCTTCTGTTCACCGGAATACTTCTGAGTTCACCGGAATACTTCTGACGACACCGAACGTGCGACAA
5263_chr15:23650001-23700000_Seq_1174_27881-27910	GCGTCGTTATGGTGCAACGTGTTCACCGGAATACTTCTGATATGAGCCCTCTTCTTTGTCACATCCTTGAGTTCACCGGAATACTTCTGAGTTCACCGGAATACTTCTGACGACACCGAACGTGCGACAA
5266_chr15:23650001-23700000_Seq_1177_27964-27993	GCGTCGTTATGGTGCAACGTGTTCACCGGAATACTTCTGAATTCTGAAATTTGTTTATTTCCCTTCTCCTGTTCACCGGAATACTTCTGAGTTCACCGGAATACTTCTGACGACACCGAACGTGCGACAA
5269_chr15:23650001-23700000_Seq_1180_28024-28053	GCGTCGTTATGGTGCAACGTGTTCACCGGAATACTTCTGAATATAGCCCCGTATGCTTGTGTGTGTGGTCGTTCACCGGAATACTTCTGAGTTCACCGGAATACTTCTGACGACACCGAACGTGCGACAA
5272_chr15:23650001-23700000_Seq_1183_28084-28113	GCGTCGTTATGGTGCAACGTGTTCACCGGAATACTTCTGACTCCTCCCAACTTcacccttccacacaccgGTTCACCGGAATACTTCTGAGTTCACCGGAATACTTCTGACGACACCGAACGTGCGACAA
5275_chr15:23650001-23700000_Seq_1186_28144-28173	GCGTCGTTATGGTGCAACGTGTTCACCGGAATACTTCTGAtagaaccaatttatgcctcacctctctaggGTTCACCGGAATACTTCTGAGTTCACCGGAATACTTCTGACGACACCGAACGTGCGACAA
5278_chr15:23650001-23700000_Seq_1189_28204-28233	GCGTCGTTATGGTGCAACGTGTTCACCGGAATACTTCTGActctttaggccccacacttctcttaggatgGTTCACCGGAATACTTCTGAGTTCACCGGAATACTTCTGACGACACCGAACGTGCGACAA
5281_chr15:23650001-23700000_Seq_1192_28264-28293	GCGTCGTTATGGTGCAACGTGTTCACCGGAATACTTCTGAtattcacctgcttctttcaattcagtgaatGTTCACCGGAATACTTCTGAGTTCACCGGAATACTTCTGACGACACCGAACGTGCGACAA
5284_chr15:23650001-23700000_Seq_1195_28324-28353	GCGTCGTTATGGTGCAACGTGTTCACCGGAATACTTCTGAgttcactcttgcatccctaactcctagcccGTTCACCGGAATACTTCTGAGTTCACCGGAATACTTCTGACGACACCGAACGTGCGACAA
5287_chr15:23650001-23700000_Seq_1198_28384-28413	GCGTCGTTATGGTGCAACGTGTTCACCGGAATACTTCTGAgcactctgaatgaatgcatAAAATAGCATGGTTCACCGGAATACTTCTGAGTTCACCGGAATACTTCTGACGACACCGAACGTGCGACAA
5290_chr15:23650001-23700000_Seq_1201_28448-28477	GCGTCGTTATGGTGCAACGTGTTCACCGGAATACTTCTGATGCCAATTTCAATTCACTCTTGCTAGTACAGTTCACCGGAATACTTCTGAGTTCACCGGAATACTTCTGACGACACCGAACGTGCGACAA
5293_chr15:23650001-23700000_Seq_1204_28578-28607	GCGTCGTTATGGTGCAACGTGTTCACCGGAATACTTCTGATTGTGTTTCCTATTAAGGCACTGACCTCTCGTTCACCGGAATACTTCTGAGTTCACCGGAATACTTCTGACGACACCGAACGTGCGACAA
5296_chr15:23650001-23700000_Seq_1214_28789-28818	GCGTCGTTATGGTGCAACGTGTTCACCGGAATACTTCTGAccaccagcctcccacctctcgacaggcctcGTTCACCGGAATACTTCTGAGTTCACCGGAATACTTCTGACGACACCGAACGTGCGACAA
5299_chr15:23650001-23700000_Seq_1337_31535-31564	GCGTCGTTATGGTGCAACGTGTTCACCGGAATACTTCTGAggcttccagcttcacccatgctcatcatcaGTTCACCGGAATACTTCTGAGTTCACCGGAATACTTCTGACGACACCGAACGTGCGACAA
5302_chr15:23650001-23700000_Seq_1357_32039-32068	GCGTCGTTATGGTGCAACGTGTTCACCGGAATACTTCTGATTTGTTAGAGTGTTTGTAGCAGTGATTCTTGTTCACCGGAATACTTCTGAGTTCACCGGAATACTTCTGACGACACCGAACGTGCGACAA
5305_chr15:23650001-23700000_Seq_1360_32119-32148	GCGTCGTTATGGTGCAACGTGTTCACCGGAATACTTCTGATCACTAATTTCAACTTATCTACATTACCTCGTTCACCGGAATACTTCTGAGTTCACCGGAATACTTCTGACGACACCGAACGTGCGACAA
5308_chr15:23650001-23700000_Seq_1388_32769-32798	GCGTCGTTATGGTGCAACGTGTTCACCGGAATACTTCTGAgcgcccTTTAAATTGGCTAATTTTTGTCAGGTTCACCGGAATACTTCTGAGTTCACCGGAATACTTCTGACGACACCGAACGTGCGACAA
5311_chr15:23650001-23700000_Seq_1391_32829-32858	GCGTCGTTATGGTGCAACGTGTTCACCGGAATACTTCTGAGGGTAGGTCTTTTCTAATATGTTGAGTTACGTTCACCGGAATACTTCTGAGTTCACCGGAATACTTCTGACGACACCGAACGTGCGACAA
5314_chr15:23650001-23700000_Seq_1394_32903-32932	GCGTCGTTATGGTGCAACGTGTTCACCGGAATACTTCTGAcatccttacctcaagtgtcaagcaaataatGTTCACCGGAATACTTCTGAGTTCACCGGAATACTTCTGACGACACCGAACGTGCGACAA
5317_chr15:23650001-23700000_Seq_1397_32963-32992	GCGTCGTTATGGTGCAACGTGTTCACCGGAATACTTCTGAgtatgtaacaatccaggaggagagaaataaGTTCACCGGAATACTTCTGAGTTCACCGGAATACTTCTGACGACACCGAACGTGCGACAA
5320_chr15:23650001-23700000_Seq_1400_33028-33057	GCGTCGTTATGGTGCAACGTGTTCACCGGAATACTTCTGAgtgcatttagaacatggctgtgcttagaggGTTCACCGGAATACTTCTGAGTTCACCGGAATACTTCTGACGACACCGAACGTGCGACAA
5322_chr15:23650001-23700000_Seq_1402_33068-33097	GCGTCGTTATGGTGCAACGTGTTCACCGGAATACTTCTGAtgttctcccaggaaatagtgttcatgagttGTTCACCGGAATACTTCTGAGTTCACCGGAATACTTCTGACGACACCGAACGTGCGACAA
5325_chr15:23650001-23700000_Seq_1405_33128-33157	GCGTCGTTATGGTGCAACGTGTTCACCGGAATACTTCTGAATAAAAGGGTTTTCAAGCAGAGGAAATATTGTTCACCGGAATACTTCTGAGTTCACCGGAATACTTCTGACGACACCGAACGTGCGACAA
5328_chr15:23650001-23700000_Seq_1408_33221-33250	GCGTCGTTATGGTGCAACGTGTTCACCGGAATACTTCTGAATTTCCTCTCAGGACAACTTACACCAGGTGGTTCACCGGAATACTTCTGAGTTCACCGGAATACTTCTGACGACACCGAACGTGCGACAA
5331_chr15:23650001-23700000_Seq_1411_33333-33362	GCGTCGTTATGGTGCAACGTGTTCACCGGAATACTTCTGACAGGTGTTTGTGAAGAAATGAGGTTCCAGTGTTCACCGGAATACTTCTGAGTTCACCGGAATACTTCTGACGACACCGAACGTGCGACAA
5334_chr15:23650001-23700000_Seq_1414_33393-33422	GCGTCGTTATGGTGCAACGTGTTCACCGGAATACTTCTGATTTAGGAAAGTCTCTCCCACCCACAGCAGTGTTCACCGGAATACTTCTGAGTTCACCGGAATACTTCTGACGACACCGAACGTGCGACAA
5337_chr15:23650001-23700000_Seq_1417_33453-33482	GCGTCGTTATGGTGCAACGTGTTCACCGGAATACTTCTGAGCAACACTGAGGACCAGCTGACCCCTTCCTGTTCACCGGAATACTTCTGAGTTCACCGGAATACTTCTGACGACACCGAACGTGCGACAA
5340_chr15:23650001-23700000_Seq_1420_33513-33542	GCGTCGTTATGGTGCAACGTGTTCACCGGAATACTTCTGAATCTTTTGGTAAATATTTGACAAACCCTCCGTTCACCGGAATACTTCTGAGTTCACCGGAATACTTCTGACGACACCGAACGTGCGACAA
5343_chr15:23650001-23700000_Seq_1423_33573-33602	GCGTCGTTATGGTGCAACGTGTTCACCGGAATACTTCTGACCCAAGAGAGCTGCTGGGTTCTCTCTCCCCGTTCACCGGAATACTTCTGAGTTCACCGGAATACTTCTGACGACACCGAACGTGCGACAA
5346_chr15:23650001-23700000_Seq_1426_33633-33662	GCGTCGTTATGGTGCAACGTGTTCACCGGAATACTTCTGAGGTGTCATGAAGTAAACTCATTTCACATCTGTTCACCGGAATACTTCTGAGTTCACCGGAATACTTCTGACGACACCGAACGTGCGACAA
5349_chr15:23650001-23700000_Seq_1429_33693-33722	GCGTCGTTATGGTGCAACGTGTTCACCGGAATACTTCTGACCTAGGCAGCATTAGGGACGAGTCGCTCTGGTTCACCGGAATACTTCTGAGTTCACCGGAATACTTCTGACGACACCGAACGTGCGACAA
5352_chr15:23650001-23700000_Seq_1432_33753-33782	GCGTCGTTATGGTGCAACGTGTTCACCGGAATACTTCTGAacattctcacattctGTTTCTCCTGCAAGGGTTCACCGGAATACTTCTGAGTTCACCGGAATACTTCTGACGACACCGAACGTGCGACAA
5355_chr15:23650001-23700000_Seq_1435_33813-33842	GCGTCGTTATGGTGCAACGTGTTCACCGGAATACTTCTGACTGTGTGAGTGAGCTTGGGACAGCTTTGGAGTTCACCGGAATACTTCTGAGTTCACCGGAATACTTCTGACGACACCGAACGTGCGACAA
5358_chr15:23650001-23700000_Seq_1438_33873-33902	GCGTCGTTATGGTGCAACGTGTTCACCGGAATACTTCTGAAGAGGAAAGTGGACACAACATAAGGAGTTAGTTCACCGGAATACTTCTGAGTTCACCGGAATACTTCTGACGACACCGAACGTGCGACAA
5361_chr15:23650001-23700000_Seq_1441_33933-33962	GCGTCGTTATGGTGCAACGTGTTCACCGGAATACTTCTGATGATTTCTGGGCTTGACTGCAAGAAGCGCAGTTCACCGGAATACTTCTGAGTTCACCGGAATACTTCTGACGACACCGAACGTGCGACAA
5364_chr15:23650001-23700000_Seq_1444_33993-34022	GCGTCGTTATGGTGCAACGTGTTCACCGGAATACTTCTGACCAGCAGTGAGGGAAGTATTAAGGCATTAGGTTCACCGGAATACTTCTGAGTTCACCGGAATACTTCTGACGACACCGAACGTGCGACAA
5367_chr15:23650001-23700000_Seq_1447_34053-34082	GCGTCGTTATGGTGCAACGTGTTCACCGGAATACTTCTGAACAACAGCCCACAGTCCTACTCCAGAAATGGTTCACCGGAATACTTCTGAGTTCACCGGAATACTTCTGACGACACCGAACGTGCGACAA
5370_chr15:23650001-23700000_Seq_1450_34113-34142	GCGTCGTTATGGTGCAACGTGTTCACCGGAATACTTCTGATGATAACGGGCAGGTTTATTTTGATTCTGGGTTCACCGGAATACTTCTGAGTTCACCGGAATACTTCTGACGACACCGAACGTGCGACAA
5373_chr15:23650001-23700000_Seq_1453_34173-34202	GCGTCGTTATGGTGCAACGTGTTCACCGGAATACTTCTGAAGATTTCCAAACAATCCTAACACTTCTGAAGTTCACCGGAATACTTCTGAGTTCACCGGAATACTTCTGACGACACCGAACGTGCGACAA
5376_chr15:23650001-23700000_Seq_1456_34233-34262	GCGTCGTTATGGTGCAACGTGTTCACCGGAATACTTCTGAAGAGGTGCCATCAAAGCCAGGTCACCCCTGGTTCACCGGAATACTTCTGAGTTCACCGGAATACTTCTGACGACACCGAACGTGCGACAA
5379_chr15:23650001-23700000_Seq_1459_34293-34322	GCGTCGTTATGGTGCAACGTGTTCACCGGAATACTTCTGATCTGCAGAACCCCCTTGAAAATCTTCACAGGTTCACCGGAATACTTCTGAGTTCACCGGAATACTTCTGACGACACCGAACGTGCGACAA
5382_chr15:23650001-23700000_Seq_1462_34353-34382	GCGTCGTTATGGTGCAACGTGTTCACCGGAATACTTCTGACAGCATGAACAGGGGCTTCCTAAGCATTTCGTTCACCGGAATACTTCTGAGTTCACCGGAATACTTCTGACGACACCGAACGTGCGACAA
5385_chr15:23650001-23700000_Seq_1465_34413-34442	GCGTCGTTATGGTGCAACGTGTTCACCGGAATACTTCTGACAGTAAGTGTTGGCAATTCCAAATTATAATGTTCACCGGAATACTTCTGAGTTCACCGGAATACTTCTGACGACACCGAACGTGCGACAA
5388_chr15:23650001-23700000_Seq_1468_34473-34502	GCGTCGTTATGGTGCAACGTGTTCACCGGAATACTTCTGATTCTTTGGGGTGTTATGTGACATGTGTCCTGTTCACCGGAATACTTCTGAGTTCACCGGAATACTTCTGACGACACCGAACGTGCGACAA
5390_chr15:23650001-23700000_Seq_1470_34513-34542	GCGTCGTTATGGTGCAACGTGTTCACCGGAATACTTCTGACATCTTCCACAGAAAAGTTTCTGGCTTTGGGTTCACCGGAATACTTCTGAGTTCACCGGAATACTTCTGACGACACCGAACGTGCGACAA
5393_chr15:23650001-23700000_Seq_1473_34573-34602	GCGTCGTTATGGTGCAACGTGTTCACCGGAATACTTCTGATAAAGGACTTCTAGTCTTATTAAAGCCCCCGTTCACCGGAATACTTCTGAGTTCACCGGAATACTTCTGACGACACCGAACGTGCGACAA
5396_chr15:23650001-23700000_Seq_1476_34633-34662	GCGTCGTTATGGTGCAACGTGTTCACCGGAATACTTCTGAAATTCACAGTGAGATTTTTCTTCAGGCATTGTTCACCGGAATACTTCTGAGTTCACCGGAATACTTCTGACGACACCGAACGTGCGACAA
5399_chr15:23650001-23700000_Seq_1479_34693-34722	GCGTCGTTATGGTGCAACGTGTTCACCGGAATACTTCTGATCCTCTGAGGATTACCTAGTGGCTCACCGCGTTCACCGGAATACTTCTGAGTTCACCGGAATACTTCTGACGACACCGAACGTGCGACAA
5402_chr15:23650001-23700000_Seq_1482_34753-34782	GCGTCGTTATGGTGCAACGTGTTCACCGGAATACTTCTGATGATGGACAACCCACCTCCCTCTCTCAGGTGTTCACCGGAATACTTCTGAGTTCACCGGAATACTTCTGACGACACCGAACGTGCGACAA
5405_chr15:23650001-23700000_Seq_1485_34813-34842	GCGTCGTTATGGTGCAACGTGTTCACCGGAATACTTCTGACACCTCCAACCCtcaggagagattgtttcaGTTCACCGGAATACTTCTGAGTTCACCGGAATACTTCTGACGACACCGAACGTGCGACAA
5408_chr15:23650001-23700000_Seq_1488_34873-34902	GCGTCGTTATGGTGCAACGTGTTCACCGGAATACTTCTGAcactttgttaggttaattaacctctccaaaGTTCACCGGAATACTTCTGAGTTCACCGGAATACTTCTGACGACACCGAACGTGCGACAA
5411_chr15:23650001-23700000_Seq_1491_34937-34966	GCGTCGTTATGGTGCAACGTGTTCACCGGAATACTTCTGAttgctttctccaaaatatcatgagaattagGTTCACCGGAATACTTCTGAGTTCACCGGAATACTTCTGACGACACCGAACGTGCGACAA
5414_chr15:23650001-23700000_Seq_1494_35010-35039	GCGTCGTTATGGTGCAACGTGTTCACCGGAATACTTCTGACCATGTGATTGTAGGCTCCCACATAAAATGGTTCACCGGAATACTTCTGAGTTCACCGGAATACTTCTGACGACACCGAACGTGCGACAA
5417_chr15:23650001-23700000_Seq_1497_35090-35119	GCGTCGTTATGGTGCAACGTGTTCACCGGAATACTTCTGAgtcgtaggcaggtggagacaaatgtgggctGTTCACCGGAATACTTCTGAGTTCACCGGAATACTTCTGACGACACCGAACGTGCGACAA
5420_chr15:23650001-23700000_Seq_1500_35150-35179	GCGTCGTTATGGTGCAACGTGTTCACCGGAATACTTCTGAccttctcttattaacctttatgagctatggGTTCACCGGAATACTTCTGAGTTCACCGGAATACTTCTGACGACACCGAACGTGCGACAA
5423_chr15:23650001-23700000_Seq_1503_35210-35239	GCGTCGTTATGGTGCAACGTGTTCACCGGAATACTTCTGAtcctccatggtgcagaggcagtaggtgcctGTTCACCGGAATACTTCTGAGTTCACCGGAATACTTCTGACGACACCGAACGTGCGACAA
5426_chr15:23650001-23700000_Seq_1506_35270-35299	GCGTCGTTATGGTGCAACGTGTTCACCGGAATACTTCTGAagaaaaatacatgttagggcttagcacaatGTTCACCGGAATACTTCTGAGTTCACCGGAATACTTCTGACGACACCGAACGTGCGACAA
5429_chr15:23650001-23700000_Seq_1591_37449-37478	GCGTCGTTATGGTGCAACGTGTTCACCGGAATACTTCTGAGCGAGGCTTCACCTGCTGGGagagcgatccGTTCACCGGAATACTTCTGAGTTCACCGGAATACTTCTGACGACACCGAACGTGCGACAA
5432_chr15:23650001-23700000_Seq_1594_37509-37538	GCGTCGTTATGGTGCAACGTGTTCACCGGAATACTTCTGAagggcaggagagaagtgagatggatgcgtaGTTCACCGGAATACTTCTGAGTTCACCGGAATACTTCTGACGACACCGAACGTGCGACAA
5435_chr15:23650001-23700000_Seq_1597_37569-37598	GCGTCGTTATGGTGCAACGTGTTCACCGGAATACTTCTGAaccttaagtttttgggatgttggggtcaagGTTCACCGGAATACTTCTGAGTTCACCGGAATACTTCTGACGACACCGAACGTGCGACAA
5438_chr15:23650001-23700000_Seq_1600_37629-37658	GCGTCGTTATGGTGCAACGTGTTCACCGGAATACTTCTGAcagaattaagttaaatatgagagtcccagaGTTCACCGGAATACTTCTGAGTTCACCGGAATACTTCTGACGACACCGAACGTGCGACAA
5441_chr15:23650001-23700000_Seq_1603_37689-37718	GCGTCGTTATGGTGCAACGTGTTCACCGGAATACTTCTGACTTTATGCGAACCAGTGAGAGGAACAGTCGGTTCACCGGAATACTTCTGAGTTCACCGGAATACTTCTGACGACACCGAACGTGCGACAA
5444_chr15:23650001-23700000_Seq_1606_37749-37778	GCGTCGTTATGGTGCAACGTGTTCACCGGAATACTTCTGAAGTGGATGTCTGAGGTTGGAATCCTGAGAAGTTCACCGGAATACTTCTGAGTTCACCGGAATACTTCTGACGACACCGAACGTGCGACAA
5447_chr15:23650001-23700000_Seq_1609_37828-37857	GCGTCGTTATGGTGCAACGTGTTCACCGGAATACTTCTGAAAAAGGGGAAATGCAGTGTGTCGTTAACGTGTTCACCGGAATACTTCTGAGTTCACCGGAATACTTCTGACGACACCGAACGTGCGACAA
5450_chr15:23650001-23700000_Seq_1612_37888-37917	GCGTCGTTATGGTGCAACGTGTTCACCGGAATACTTCTGACTTTTTAAGTAGGCAGTGGACTTAGAGCATGTTCACCGGAATACTTCTGAGTTCACCGGAATACTTCTGACGACACCGAACGTGCGACAA
5453_chr15:23650001-23700000_Seq_1615_37948-37977	GCGTCGTTATGGTGCAACGTGTTCACCGGAATACTTCTGATTTTACACTTCCTTTGGGTAACTTTGATTCGTTCACCGGAATACTTCTGAGTTCACCGGAATACTTCTGACGACACCGAACGTGCGACAA
5456_chr15:23650001-23700000_Seq_1618_38030-38059	GCGTCGTTATGGTGCAACGTGTTCACCGGAATACTTCTGATAGCACAAACTTGTATGATAATGTCTTTTCGTTCACCGGAATACTTCTGAGTTCACCGGAATACTTCTGACGACACCGAACGTGCGACAA
5458_chr15:23650001-23700000_Seq_1620_38070-38099	GCGTCGTTATGGTGCAACGTGTTCACCGGAATACTTCTGAGCACCCTCATTCTTCAATTCACCTTCTCTCGTTCACCGGAATACTTCTGAGTTCACCGGAATACTTCTGACGACACCGAACGTGCGACAA
5461_chr15:23650001-23700000_Seq_1623_38130-38159	GCGTCGTTATGGTGCAACGTGTTCACCGGAATACTTCTGAACGTTGGAAGCCACACCCAAGTCTTTCCTGGTTCACCGGAATACTTCTGAGTTCACCGGAATACTTCTGACGACACCGAACGTGCGACAA
5464_chr15:23650001-23700000_Seq_1626_38211-38240	GCGTCGTTATGGTGCAACGTGTTCACCGGAATACTTCTGAGATGACCAAAGGGTAGCAGGGGAAACATAGGTTCACCGGAATACTTCTGAGTTCACCGGAATACTTCTGACGACACCGAACGTGCGACAA
5467_chr15:23650001-23700000_Seq_1629_38271-38300	GCGTCGTTATGGTGCAACGTGTTCACCGGAATACTTCTGAATTCCCAGTGGGCAAAGACAAAACTGTCACGTTCACCGGAATACTTCTGAGTTCACCGGAATACTTCTGACGACACCGAACGTGCGACAA
5470_chr15:23650001-23700000_Seq_1632_38341-38370	GCGTCGTTATGGTGCAACGTGTTCACCGGAATACTTCTGACATCTGAAACCAGGGACCTTAATGCTGCTTGTTCACCGGAATACTTCTGAGTTCACCGGAATACTTCTGACGACACCGAACGTGCGACAA
5473_chr15:23650001-23700000_Seq_1635_38401-38430	GCGTCGTTATGGTGCAACGTGTTCACCGGAATACTTCTGATTCAGCTCTTCCCGGGTTTCTTCTCATCAGGTTCACCGGAATACTTCTGAGTTCACCGGAATACTTCTGACGACACCGAACGTGCGACAA
5476_chr15:23650001-23700000_Seq_1639_38489-38518	GCGTCGTTATGGTGCAACGTGTTCACCGGAATACTTCTGATTTAAAAATTGTCTTGACATGTCTAGAGTCGTTCACCGGAATACTTCTGAGTTCACCGGAATACTTCTGACGACACCGAACGTGCGACAA
5479_chr15:23650001-23700000_Seq_1642_38549-38578	GCGTCGTTATGGTGCAACGTGTTCACCGGAATACTTCTGATATTTTTCCTCAAGCAGGTTGATGTTGAAAGTTCACCGGAATACTTCTGAGTTCACCGGAATACTTCTGACGACACCGAACGTGCGACAA
5482_chr15:23650001-23700000_Seq_1645_38609-38638	GCGTCGTTATGGTGCAACGTGTTCACCGGAATACTTCTGACACGCACATAACACTTTTGGCAGAGCCATTGTTCACCGGAATACTTCTGAGTTCACCGGAATACTTCTGACGACACCGAACGTGCGACAA
5485_chr15:23650001-23700000_Seq_1648_38669-38698	GCGTCGTTATGGTGCAACGTGTTCACCGGAATACTTCTGAAGCTTCCCACTTCACCAGGGTAATTCCTAGGTTCACCGGAATACTTCTGAGTTCACCGGAATACTTCTGACGACACCGAACGTGCGACAA
5488_chr15:23650001-23700000_Seq_1651_38729-38758	GCGTCGTTATGGTGCAACGTGTTCACCGGAATACTTCTGACTTTTctcctcctcctcaccctcctccaccGTTCACCGGAATACTTCTGAGTTCACCGGAATACTTCTGACGACACCGAACGTGCGACAA
5491_chr15:23650001-23700000_Seq_1654_38791-38820	GCGTCGTTATGGTGCAACGTGTTCACCGGAATACTTCTGAttctccttcttctATTTATAGATATCTACCGTTCACCGGAATACTTCTGAGTTCACCGGAATACTTCTGACGACACCGAACGTGCGACAA
5494_chr15:23650001-23700000_Seq_1657_38881-38910	GCGTCGTTATGGTGCAACGTGTTCACCGGAATACTTCTGATCTTGAACAGACTTATTACCCCCATGCTTCGTTCACCGGAATACTTCTGAGTTCACCGGAATACTTCTGACGACACCGAACGTGCGACAA
5497_chr15:23650001-23700000_Seq_1660_38992-39021	GCGTCGTTATGGTGCAACGTGTTCACCGGAATACTTCTGACTATTTAAATAAAATATTTAggccaggtgcGTTCACCGGAATACTTCTGAGTTCACCGGAATACTTCTGACGACACCGAACGTGCGACAA
5500_chr15:23650001-23700000_Seq_1674_39273-39302	GCGTCGTTATGGTGCAACGTGTTCACCGGAATACTTCTGAaacagagcgagactgtctcaaacattaaatGTTCACCGGAATACTTCTGAGTTCACCGGAATACTTCTGACGACACCGAACGTGCGACAA
5503_chr15:23650001-23700000_Seq_1677_39394-39423	GCGTCGTTATGGTGCAACGTGTTCACCGGAATACTTCTGACCATAGGCTATGGTTTTTAACATTGTGATCGTTCACCGGAATACTTCTGAGTTCACCGGAATACTTCTGACGACACCGAACGTGCGACAA
5506_chr15:23650001-23700000_Seq_1680_39454-39483	GCGTCGTTATGGTGCAACGTGTTCACCGGAATACTTCTGATCCGAGATGTAATGGATTCTTGAAATTAAAGTTCACCGGAATACTTCTGAGTTCACCGGAATACTTCTGACGACACCGAACGTGCGACAA
5509_chr15:23650001-23700000_Seq_1683_39514-39543	GCGTCGTTATGGTGCAACGTGTTCACCGGAATACTTCTGAGGTGGCTCTGCTGAAGTGAGTATCAGCGCTGTTCACCGGAATACTTCTGAGTTCACCGGAATACTTCTGACGACACCGAACGTGCGACAA
5512_chr15:23650001-23700000_Seq_1686_39574-39603	GCGTCGTTATGGTGCAACGTGTTCACCGGAATACTTCTGACTGCCTGGGCAGGACTGGATAACTTCTACCGTTCACCGGAATACTTCTGAGTTCACCGGAATACTTCTGACGACACCGAACGTGCGACAA
5515_chr15:23650001-23700000_Seq_1689_39634-39663	GCGTCGTTATGGTGCAACGTGTTCACCGGAATACTTCTGACAAGCAGACTGTGCAGAAGGCCTCTCCTGCGTTCACCGGAATACTTCTGAGTTCACCGGAATACTTCTGACGACACCGAACGTGCGACAA
5518_chr15:23650001-23700000_Seq_1692_39694-39723	GCGTCGTTATGGTGCAACGTGTTCACCGGAATACTTCTGAGGGTTGTCCAATGCTGTACCAGGGCCTGTCGTTCACCGGAATACTTCTGAGTTCACCGGAATACTTCTGACGACACCGAACGTGCGACAA
5521_chr15:23650001-23700000_Seq_1695_39754-39783	GCGTCGTTATGGTGCAACGTGTTCACCGGAATACTTCTGAGAAGGCTTAAAGCCTTAGGTCTGATGCACAGTTCACCGGAATACTTCTGAGTTCACCGGAATACTTCTGACGACACCGAACGTGCGACAA
5524_chr15:23650001-23700000_Seq_1698_39814-39843	GCGTCGTTATGGTGCAACGTGTTCACCGGAATACTTCTGAAGCCCAACTGTACACCTGCTAAAATGATATGTTCACCGGAATACTTCTGAGTTCACCGGAATACTTCTGACGACACCGAACGTGCGACAA
5526_chr15:23650001-23700000_Seq_1700_39879-39908	GCGTCGTTATGGTGCAACGTGTTCACCGGAATACTTCTGACCCCCAAAATCAAATTACTGGGAGTAGAAGGTTCACCGGAATACTTCTGAGTTCACCGGAATACTTCTGACGACACCGAACGTGCGACAA
5529_chr15:23650001-23700000_Seq_1703_39939-39968	GCGTCGTTATGGTGCAACGTGTTCACCGGAATACTTCTGAAAGCCTGGGATAGCCTGTTAGTGGGGAAAGGTTCACCGGAATACTTCTGAGTTCACCGGAATACTTCTGACGACACCGAACGTGCGACAA
5532_chr15:23650001-23700000_Seq_1706_39999-40028	GCGTCGTTATGGTGCAACGTGTTCACCGGAATACTTCTGAGGTCAGTAGCTTGATGGCTGCCTAATAAGGGTTCACCGGAATACTTCTGAGTTCACCGGAATACTTCTGACGACACCGAACGTGCGACAA
5535_chr15:23650001-23700000_Seq_1709_40059-40088	GCGTCGTTATGGTGCAACGTGTTCACCGGAATACTTCTGATCAGAGTAATAACAAAAAGGACCAAAGACAGTTCACCGGAATACTTCTGAGTTCACCGGAATACTTCTGACGACACCGAACGTGCGACAA
5538_chr15:23650001-23700000_Seq_1712_40119-40148	GCGTCGTTATGGTGCAACGTGTTCACCGGAATACTTCTGAGAAGGCATCCACAACTACCTTGACCCAAGGGTTCACCGGAATACTTCTGAGTTCACCGGAATACTTCTGACGACACCGAACGTGCGACAA
5541_chr15:23650001-23700000_Seq_1715_40179-40208	GCGTCGTTATGGTGCAACGTGTTCACCGGAATACTTCTGATCCTGAGAGTCATGGGGATAATAAATCTTGGTTCACCGGAATACTTCTGAGTTCACCGGAATACTTCTGACGACACCGAACGTGCGACAA
5544_chr15:23650001-23700000_Seq_1718_40263-40292	GCGTCGTTATGGTGCAACGTGTTCACCGGAATACTTCTGACCAGCAGCTTAGTAGAAAAGTGTGAAGACTGTTCACCGGAATACTTCTGAGTTCACCGGAATACTTCTGACGACACCGAACGTGCGACAA
5547_chr15:23650001-23700000_Seq_1721_40347-40376	GCGTCGTTATGGTGCAACGTGTTCACCGGAATACTTCTGAGTGAATAGACACAGAAAATATACGGAGAAGGTTCACCGGAATACTTCTGAGTTCACCGGAATACTTCTGACGACACCGAACGTGCGACAA
5550_chr15:23650001-23700000_Seq_1724_40407-40436	GCGTCGTTATGGTGCAACGTGTTCACCGGAATACTTCTGATTTTGCTGGTGGGTTACTTCGAACTCTGTAGTTCACCGGAATACTTCTGAGTTCACCGGAATACTTCTGACGACACCGAACGTGCGACAA
5553_chr15:23650001-23700000_Seq_1727_40467-40496	GCGTCGTTATGGTGCAACGTGTTCACCGGAATACTTCTGAGGCTGTTCTTGGCAGACCCAGGAACAGGAGGTTCACCGGAATACTTCTGAGTTCACCGGAATACTTCTGACGACACCGAACGTGCGACAA
5556_chr15:23650001-23700000_Seq_1730_40541-40570	GCGTCGTTATGGTGCAACGTGTTCACCGGAATACTTCTGAGGGGGTCACCCCAGAGCCTCTAGTGGGAAGGTTCACCGGAATACTTCTGAGTTCACCGGAATACTTCTGACGACACCGAACGTGCGACAA
5559_chr15:23650001-23700000_Seq_1733_40606-40635	GCGTCGTTATGGTGCAACGTGTTCACCGGAATACTTCTGAGGATGAAATGTGAATCCTCTGGCTCTTCCCGTTCACCGGAATACTTCTGAGTTCACCGGAATACTTCTGACGACACCGAACGTGCGACAA
5562_chr15:23650001-23700000_Seq_1736_40666-40695	GCGTCGTTATGGTGCAACGTGTTCACCGGAATACTTCTGAAGCCCCTAAATGGGCCCCAAATGCCTTTCAGTTCACCGGAATACTTCTGAGTTCACCGGAATACTTCTGACGACACCGAACGTGCGACAA
5565_chr15:23650001-23700000_Seq_1739_40726-40755	GCGTCGTTATGGTGCAACGTGTTCACCGGAATACTTCTGAATGTGTTCAGCAAATATTGAGCAATATCCGGTTCACCGGAATACTTCTGAGTTCACCGGAATACTTCTGACGACACCGAACGTGCGACAA
5568_chr15:23650001-23700000_Seq_1742_40786-40815	GCGTCGTTATGGTGCAACGTGTTCACCGGAATACTTCTGAAAGTCTCAGTCTGAGGGAAAAACCCATGGCGTTCACCGGAATACTTCTGAGTTCACCGGAATACTTCTGACGACACCGAACGTGCGACAA
5571_chr15:23650001-23700000_Seq_1745_40872-40901	GCGTCGTTATGGTGCAACGTGTTCACCGGAATACTTCTGATTTCCAAAGTTGGGAGGGTGTAGGGAGGGAGTTCACCGGAATACTTCTGAGTTCACCGGAATACTTCTGACGACACCGAACGTGCGACAA
5574_chr15:23650001-23700000_Seq_1748_40933-40962	GCGTCGTTATGGTGCAACGTGTTCACCGGAATACTTCTGATAGGGGGCCACTGCTCATGCTCATCCATTCGTTCACCGGAATACTTCTGAGTTCACCGGAATACTTCTGACGACACCGAACGTGCGACAA
5577_chr15:23650001-23700000_Seq_1751_40993-41022	GCGTCGTTATGGTGCAACGTGTTCACCGGAATACTTCTGAATTTTCTGTTCTGCACAGCCCCAAGGAGCAGTTCACCGGAATACTTCTGAGTTCACCGGAATACTTCTGACGACACCGAACGTGCGACAA
5580_chr15:23650001-23700000_Seq_1754_41053-41082	GCGTCGTTATGGTGCAACGTGTTCACCGGAATACTTCTGAGTCttctgaaaagtcacctgcatacagagtGTTCACCGGAATACTTCTGAGTTCACCGGAATACTTCTGACGACACCGAACGTGCGACAA
5583_chr15:23650001-23700000_Seq_1757_41114-41143	GCGTCGTTATGGTGCAACGTGTTCACCGGAATACTTCTGAgaggcagggagtctcattaggggtcccttcGTTCACCGGAATACTTCTGAGTTCACCGGAATACTTCTGACGACACCGAACGTGCGACAA
5586_chr15:23650001-23700000_Seq_1760_41174-41203	GCGTCGTTATGGTGCAACGTGTTCACCGGAATACTTCTGAttgCATttcatcttcattcgccaactgtttGTTCACCGGAATACTTCTGAGTTCACCGGAATACTTCTGACGACACCGAACGTGCGACAA
5589_chr15:23650001-23700000_Seq_1763_41234-41263	GCGTCGTTATGGTGCAACGTGTTCACCGGAATACTTCTGAgggatacaatgagaagtgacatggtctctgGTTCACCGGAATACTTCTGAGTTCACCGGAATACTTCTGACGACACCGAACGTGCGACAA
5591_chr15:23650001-23700000_Seq_1765_41274-41303	GCGTCGTTATGGTGCAACGTGTTCACCGGAATACTTCTGATGAGGGAAAGTGGTGGAGAAAAAGAGCGTTGTTCACCGGAATACTTCTGAGTTCACCGGAATACTTCTGACGACACCGAACGTGCGACAA
5594_chr15:23650001-23700000_Seq_1768_41340-41369	GCGTCGTTATGGTGCAACGTGTTCACCGGAATACTTCTGAATGATGCATATTGTGAAGCAATATTATCACGTTCACCGGAATACTTCTGAGTTCACCGGAATACTTCTGACGACACCGAACGTGCGACAA
5597_chr15:23650001-23700000_Seq_1771_41400-41429	GCGTCGTTATGGTGCAACGTGTTCACCGGAATACTTCTGAATAGAAATGCCAGGTTCAAAAGATATAAACGTTCACCGGAATACTTCTGAGTTCACCGGAATACTTCTGACGACACCGAACGTGCGACAA
5600_chr15:23650001-23700000_Seq_1774_41460-41489	GCGTCGTTATGGTGCAACGTGTTCACCGGAATACTTCTGAAACAGGCACATCCAGGATTCTGTCTCAGGCGTTCACCGGAATACTTCTGAGTTCACCGGAATACTTCTGACGACACCGAACGTGCGACAA
5603_chr15:23650001-23700000_Seq_1777_41520-41549	GCGTCGTTATGGTGCAACGTGTTCACCGGAATACTTCTGAGATGCAGGTGCCATTTCCTGAAACCATGCAGTTCACCGGAATACTTCTGAGTTCACCGGAATACTTCTGACGACACCGAACGTGCGACAA
5606_chr15:23650001-23700000_Seq_1780_41580-41609	GCGTCGTTATGGTGCAACGTGTTCACCGGAATACTTCTGACGAACGGTCTTACCCAGCGGATATCTGGATGTTCACCGGAATACTTCTGAGTTCACCGGAATACTTCTGACGACACCGAACGTGCGACAA
5609_chr15:23650001-23700000_Seq_1783_41640-41669	GCGTCGTTATGGTGCAACGTGTTCACCGGAATACTTCTGAGAAAGTTAAGTTTGGAAGGTAAAGAAGATAGTTCACCGGAATACTTCTGAGTTCACCGGAATACTTCTGACGACACCGAACGTGCGACAA
5612_chr15:23650001-23700000_Seq_1786_41700-41729	GCGTCGTTATGGTGCAACGTGTTCACCGGAATACTTCTGAGGGCTCTTTAATGATCTGAGAATGGCGTAAGTTCACCGGAATACTTCTGAGTTCACCGGAATACTTCTGACGACACCGAACGTGCGACAA
5615_chr15:23650001-23700000_Seq_1789_41760-41789	GCGTCGTTATGGTGCAACGTGTTCACCGGAATACTTCTGACACAGAGGCTGTCTCCCTTCACATGCACACGTTCACCGGAATACTTCTGAGTTCACCGGAATACTTCTGACGACACCGAACGTGCGACAA
5618_chr15:23650001-23700000_Seq_1792_41820-41849	GCGTCGTTATGGTGCAACGTGTTCACCGGAATACTTCTGACAGGAAAGTGGAGAAAAGAGAAAAGGAACCGTTCACCGGAATACTTCTGAGTTCACCGGAATACTTCTGACGACACCGAACGTGCGACAA
5621_chr15:23650001-23700000_Seq_1795_41880-41909	GCGTCGTTATGGTGCAACGTGTTCACCGGAATACTTCTGAGGGCAGCGCGGTCCCCAACTGAGAACCACAGTTCACCGGAATACTTCTGAGTTCACCGGAATACTTCTGACGACACCGAACGTGCGACAA
5624_chr15:23650001-23700000_Seq_1798_41940-41969	GCGTCGTTATGGTGCAACGTGTTCACCGGAATACTTCTGAGACAGGCATAGCAATAGGCCCAGGTGATTTGTTCACCGGAATACTTCTGAGTTCACCGGAATACTTCTGACGACACCGAACGTGCGACAA
5627_chr15:23650001-23700000_Seq_1801_42000-42029	GCGTCGTTATGGTGCAACGTGTTCACCGGAATACTTCTGACCAATTGGAGCTATTTCTGGGACATATTAAGTTCACCGGAATACTTCTGAGTTCACCGGAATACTTCTGACGACACCGAACGTGCGACAA
5630_chr15:23650001-23700000_Seq_1804_42060-42089	GCGTCGTTATGGTGCAACGTGTTCACCGGAATACTTCTGACTAAGATAAACTCTATTCAAGAAGATGTTGGTTCACCGGAATACTTCTGAGTTCACCGGAATACTTCTGACGACACCGAACGTGCGACAA
5633_chr15:23650001-23700000_Seq_1808_42150-42179	GCGTCGTTATGGTGCAACGTGTTCACCGGAATACTTCTGAtagctgagagtttttatttatatgctcaacGTTCACCGGAATACTTCTGAGTTCACCGGAATACTTCTGACGACACCGAACGTGCGACAA
5636_chr15:23650001-23700000_Seq_1811_42210-42239	GCGTCGTTATGGTGCAACGTGTTCACCGGAATACTTCTGAgtaatgtctgtatctggttttgacattataGTTCACCGGAATACTTCTGAGTTCACCGGAATACTTCTGACGACACCGAACGTGCGACAA
5639_chr15:23650001-23700000_Seq_1814_42272-42301	GCGTCGTTATGGTGCAACGTGTTCACCGGAATACTTCTGAcagctttatggaataaattgtgtagaattgGTTCACCGGAATACTTCTGAGTTCACCGGAATACTTCTGACGACACCGAACGTGCGACAA
5642_chr15:23650001-23700000_Seq_1818_42403-42432	GCGTCGTTATGGTGCAACGTGTTCACCGGAATACTTCTGAaagcctattcagattatcttttcataatggGTTCACCGGAATACTTCTGAGTTCACCGGAATACTTCTGACGACACCGAACGTGCGACAA
5645_chr15:23650001-23700000_Seq_1821_42463-42492	GCGTCGTTATGGTGCAACGTGTTCACCGGAATACTTCTGAgttggctcatgtattagttcattctggaatGTTCACCGGAATACTTCTGAGTTCACCGGAATACTTCTGACGACACCGAACGTGCGACAA
5648_chr15:23650001-23700000_Seq_1826_42565-42594	GCGTCGTTATGGTGCAACGTGTTCACCGGAATACTTCTGActgtacaggaaacatgactggggagcctcaGTTCACCGGAATACTTCTGAGTTCACCGGAATACTTCTGACGACACCGAACGTGCGACAA
5651_chr15:23650001-23700000_Seq_1830_42645-42674	GCGTCGTTATGGTGCAACGTGTTCACCGGAATACTTCTGAataaccagagcaggaggaggaaagccaagaGTTCACCGGAATACTTCTGAGTTCACCGGAATACTTCTGACGACACCGAACGTGCGACAA
5654_chr15:23650001-23700000_Seq_1834_42725-42754	GCGTCGTTATGGTGCAACGTGTTCACCGGAATACTTCTGActatcaggagaacagcaaggaggaagtccaGTTCACCGGAATACTTCTGAGTTCACCGGAATACTTCTGACGACACCGAACGTGCGACAA
5657_chr15:23650001-23700000_Seq_1838_42805-42834	GCGTCGTTATGGTGCAACGTGTTCACCGGAATACTTCTGAgagaggtgagatttgggcaggaacacaaatGTTCACCGGAATACTTCTGAGTTCACCGGAATACTTCTGACGACACCGAACGTGCGACAA
5659_chr15:23650001-23700000_Seq_1840_42857-42886	GCGTCGTTATGGTGCAACGTGTTCACCGGAATACTTCTGAatctaatttgtcaaatttatgtgtgtcctgGTTCACCGGAATACTTCTGAGTTCACCGGAATACTTCTGACGACACCGAACGTGCGACAA
5662_chr15:23650001-23700000_Seq_1843_42928-42957	GCGTCGTTATGGTGCAACGTGTTCACCGGAATACTTCTGATCTACCAAGCAGTCTTGGGTTCCTTATCTAGTTCACCGGAATACTTCTGAGTTCACCGGAATACTTCTGACGACACCGAACGTGCGACAA
5665_chr15:23650001-23700000_Seq_1846_42988-43017	GCGTCGTTATGGTGCAACGTGTTCACCGGAATACTTCTGACACACACACATGCACCACCCATGTCATGGCGTTCACCGGAATACTTCTGAGTTCACCGGAATACTTCTGACGACACCGAACGTGCGACAA
5668_chr15:23650001-23700000_Seq_1849_43048-43077	GCGTCGTTATGGTGCAACGTGTTCACCGGAATACTTCTGAGTATACCATAGACTTCAGGGATTGCTGAGAGTTCACCGGAATACTTCTGAGTTCACCGGAATACTTCTGACGACACCGAACGTGCGACAA
5671_chr15:23650001-23700000_Seq_1852_43108-43137	GCGTCGTTATGGTGCAACGTGTTCACCGGAATACTTCTGAtatctttctccagccatcctctaaaagttgGTTCACCGGAATACTTCTGAGTTCACCGGAATACTTCTGACGACACCGAACGTGCGACAA
5674_chr15:23650001-23700000_Seq_1855_43168-43197	GCGTCGTTATGGTGCAACGTGTTCACCGGAATACTTCTGAtgttcctgtcaccttgtattctgagcaacaGTTCACCGGAATACTTCTGAGTTCACCGGAATACTTCTGACGACACCGAACGTGCGACAA
5677_chr15:23650001-23700000_Seq_1858_43228-43257	GCGTCGTTATGGTGCAACGTGTTCACCGGAATACTTCTGAtacacaaatgagtccaaaattcatttctccGTTCACCGGAATACTTCTGAGTTCACCGGAATACTTCTGACGACACCGAACGTGCGACAA
5680_chr15:23650001-23700000_Seq_1862_43308-43337	GCGTCGTTATGGTGCAACGTGTTCACCGGAATACTTCTGAatgtcatcttaacattgtgcctttgagtttGTTCACCGGAATACTTCTGAGTTCACCGGAATACTTCTGACGACACCGAACGTGCGACAA
5683_chr15:23650001-23700000_Seq_1867_43455-43484	GCGTCGTTATGGTGCAACGTGTTCACCGGAATACTTCTGAtcccccaggctcaggttattttcccacctcGTTCACCGGAATACTTCTGAGTTCACCGGAATACTTCTGACGACACCGAACGTGCGACAA
5686_chr15:23650001-23700000_Seq_1870_43515-43544	GCGTCGTTATGGTGCAACGTGTTCACCGGAATACTTCTGAtgccaccacgcttggctaaattttcatattGTTCACCGGAATACTTCTGAGTTCACCGGAATACTTCTGACGACACCGAACGTGCGACAA
5689_chr15:23650001-23700000_Seq_1873_43578-43607	GCGTCGTTATGGTGCAACGTGTTCACCGGAATACTTCTGAttgtcttgaactgctggacccaactaatccGTTCACCGGAATACTTCTGAGTTCACCGGAATACTTCTGACGACACCGAACGTGCGACAA
5692_chr15:23650001-23700000_Seq_1878_43678-43707	GCGTCGTTATGGTGCAACGTGTTCACCGGAATACTTCTGAcaacattttactctacttcatcagtgtctgGTTCACCGGAATACTTCTGAGTTCACCGGAATACTTCTGACGACACCGAACGTGCGACAA
5695_chr15:23650001-23700000_Seq_1881_43738-43767	GCGTCGTTATGGTGCAACGTGTTCACCGGAATACTTCTGAtacctcacagtacatggcatagctgtccacGTTCACCGGAATACTTCTGAGTTCACCGGAATACTTCTGACGACACCGAACGTGCGACAA
5698_chr15:23650001-23700000_Seq_1884_43798-43827	GCGTCGTTATGGTGCAACGTGTTCACCGGAATACTTCTGAactgattctcctgtatccttcatatcTAGAGTTCACCGGAATACTTCTGAGTTCACCGGAATACTTCTGACGACACCGAACGTGCGACAA
5701_chr15:23650001-23700000_Seq_1887_43858-43887	GCGTCGTTATGGTGCAACGTGTTCACCGGAATACTTCTGAACTTACTGCCATCCACGACTATATTCCACCGTTCACCGGAATACTTCTGAGTTCACCGGAATACTTCTGACGACACCGAACGTGCGACAA
5704_chr15:23650001-23700000_Seq_1890_43918-43947	GCGTCGTTATGGTGCAACGTGTTCACCGGAATACTTCTGACACCCTCTGTGCCTTCTCACTAGTTTATTCGTTCACCGGAATACTTCTGAGTTCACCGGAATACTTCTGACGACACCGAACGTGCGACAA
5707_chr15:23650001-23700000_Seq_1893_43994-44023	GCGTCGTTATGGTGCAACGTGTTCACCGGAATACTTCTGAAAAACATTTCTCCCAtatttgtttcctaagGTTCACCGGAATACTTCTGAGTTCACCGGAATACTTCTGACGACACCGAACGTGCGACAA
5710_chr15:23650001-23700000_Seq_1896_44073-44102	GCGTCGTTATGGTGCAACGTGTTCACCGGAATACTTCTGAgtattctcttgtagatttggcagccagaagGTTCACCGGAATACTTCTGAGTTCACCGGAATACTTCTGACGACACCGAACGTGCGACAA
5713_chr15:23650001-23700000_Seq_1899_44133-44162	GCGTCGTTATGGTGCAACGTGTTCACCGGAATACTTCTGAtcctaccaaaggctttaagggagaatctgtGTTCACCGGAATACTTCTGAGTTCACCGGAATACTTCTGACGACACCGAACGTGCGACAA
5716_chr15:23650001-23700000_Seq_1902_44193-44222	GCGTCGTTATGGTGCAACGTGTTCACCGGAATACTTCTGAggcattccttgactggtagcaaaataactcGTTCACCGGAATACTTCTGAGTTCACCGGAATACTTCTGACGACACCGAACGTGCGACAA
5719_chr15:23650001-23700000_Seq_1905_44253-44282	GCGTCGTTATGGTGCAACGTGTTCACCGGAATACTTCTGAACAAATGGCATAGAGTACTGTGGGATTTCTGTTCACCGGAATACTTCTGAGTTCACCGGAATACTTCTGACGACACCGAACGTGCGACAA
5722_chr15:23650001-23700000_Seq_1908_44313-44342	GCGTCGTTATGGTGCAACGTGTTCACCGGAATACTTCTGATCAATGAGGCTGGAAAAGACTGCTAAATAAGTTCACCGGAATACTTCTGAGTTCACCGGAATACTTCTGACGACACCGAACGTGCGACAA
5725_chr15:23650001-23700000_Seq_1911_44373-44402	GCGTCGTTATGGTGCAACGTGTTCACCGGAATACTTCTGATGGTTACTGGTACAGCACAGTCATATTGATGTTCACCGGAATACTTCTGAGTTCACCGGAATACTTCTGACGACACCGAACGTGCGACAA
5727_chr15:23650001-23700000_Seq_1913_44413-44442	GCGTCGTTATGGTGCAACGTGTTCACCGGAATACTTCTGACTGGTCTCAAGAGAAAGGATGTTTGCTGTTGTTCACCGGAATACTTCTGAGTTCACCGGAATACTTCTGACGACACCGAACGTGCGACAA
5730_chr15:23650001-23700000_Seq_1916_44473-44502	GCGTCGTTATGGTGCAACGTGTTCACCGGAATACTTCTGACTGGAGTCTCATGAAAAATAGCCTCAAATCGTTCACCGGAATACTTCTGAGTTCACCGGAATACTTCTGACGACACCGAACGTGCGACAA
5733_chr15:23650001-23700000_Seq_1919_44533-44562	GCGTCGTTATGGTGCAACGTGTTCACCGGAATACTTCTGACATTCAGGTACCAGCTTTTGGAATATGGAAGTTCACCGGAATACTTCTGAGTTCACCGGAATACTTCTGACGACACCGAACGTGCGACAA
5736_chr15:23650001-23700000_Seq_1922_44593-44622	GCGTCGTTATGGTGCAACGTGTTCACCGGAATACTTCTGATCATCCCCAGTTGGATCAGACTTGTTAGTTGTTCACCGGAATACTTCTGAGTTCACCGGAATACTTCTGACGACACCGAACGTGCGACAA
5739_chr15:23650001-23700000_Seq_1925_44715-44744	GCGTCGTTATGGTGCAACGTGTTCACCGGAATACTTCTGACCCCCAGTTATTACTAATGTGTCAATTAGGGTTCACCGGAATACTTCTGAGTTCACCGGAATACTTCTGACGACACCGAACGTGCGACAA
5742_chr15:23650001-23700000_Seq_1928_44777-44806	GCGTCGTTATGGTGCAACGTGTTCACCGGAATACTTCTGAATTGCGTCATTTCTACTTTGTTGAATTATGGTTCACCGGAATACTTCTGAGTTCACCGGAATACTTCTGACGACACCGAACGTGCGACAA
5745_chr15:23650001-23700000_Seq_1931_44837-44866	GCGTCGTTATGGTGCAACGTGTTCACCGGAATACTTCTGAtacagtaatcacacaaatttagtgcagatcGTTCACCGGAATACTTCTGAGTTCACCGGAATACTTCTGACGACACCGAACGTGCGACAA
5748_chr15:23650001-23700000_Seq_1934_44897-44926	GCGTCGTTATGGTGCAACGTGTTCACCGGAATACTTCTGAgaatgttcttccaatgccagctgtacttcaGTTCACCGGAATACTTCTGAGTTCACCGGAATACTTCTGACGACACCGAACGTGCGACAA
5751_chr15:23650001-23700000_Seq_1937_44957-44986	GCGTCGTTATGGTGCAACGTGTTCACCGGAATACTTCTGAaactacctacatatttggagattcccatgaGTTCACCGGAATACTTCTGAGTTCACCGGAATACTTCTGACGACACCGAACGTGCGACAA
5754_chr15:23650001-23700000_Seq_1940_45020-45049	GCGTCGTTATGGTGCAACGTGTTCACCGGAATACTTCTGAaacagaactcactgaaagtgctgtacttatGTTCACCGGAATACTTCTGAGTTCACCGGAATACTTCTGACGACACCGAACGTGCGACAA
5757_chr15:23650001-23700000_Seq_1943_45094-45123	GCGTCGTTATGGTGCAACGTGTTCACCGGAATACTTCTGAtggaggaacagcagagatttatgacctctcGTTCACCGGAATACTTCTGAGTTCACCGGAATACTTCTGACGACACCGAACGTGCGACAA
5760_chr15:23650001-23700000_Seq_1946_45154-45183	GCGTCGTTATGGTGCAACGTGTTCACCGGAATACTTCTGAgaccatccatttgttcacaaaaaccaggaaGTTCACCGGAATACTTCTGAGTTCACCGGAATACTTCTGACGACACCGAACGTGCGACAA
5763_chr15:23650001-23700000_Seq_1951_45254-45283	GCGTCGTTATGGTGCAACGTGTTCACCGGAATACTTCTGAggccatgtgattgaactcagccaccaggtcGTTCACCGGAATACTTCTGAGTTCACCGGAATACTTCTGACGACACCGAACGTGCGACAA
5766_chr15:23650001-23700000_Seq_1954_45314-45343	GCGTCGTTATGGTGCAACGTGTTCACCGGAATACTTCTGAagtcccaactctgtaatcatatatttagtcGTTCACCGGAATACTTCTGAGTTCACCGGAATACTTCTGACGACACCGAACGTGCGACAA
5769_chr15:23650001-23700000_Seq_1957_45374-45403	GCGTCGTTATGGTGCAACGTGTTCACCGGAATACTTCTGAttgatccatcatgagttaccttattagcatGTTCACCGGAATACTTCTGAGTTCACCGGAATACTTCTGACGACACCGAACGTGCGACAA
5772_chr15:23650001-23700000_Seq_1961_45478-45507	GCGTCGTTATGGTGCAACGTGTTCACCGGAATACTTCTGATTTTTATTGTAACACAGGCTCTGATAAGATGTTCACCGGAATACTTCTGAGTTCACCGGAATACTTCTGACGACACCGAACGTGCGACAA
5775_chr15:23650001-23700000_Seq_1964_45538-45567	GCGTCGTTATGGTGCAACGTGTTCACCGGAATACTTCTGAATTCTAGCTTCCTCTATTTGATGCTTACTGGTTCACCGGAATACTTCTGAGTTCACCGGAATACTTCTGACGACACCGAACGTGCGACAA
5778_chr15:23650001-23700000_Seq_1967_45598-45627	GCGTCGTTATGGTGCAACGTGTTCACCGGAATACTTCTGACAAAGGAAAGCTGAGAAGCgccaagaccagGTTCACCGGAATACTTCTGAGTTCACCGGAATACTTCTGACGACACCGAACGTGCGACAA
5781_chr15:23650001-23700000_Seq_1982_45931-45960	GCGTCGTTATGGTGCAACGTGTTCACCGGAATACTTCTGAttgtggtttaggaactccttaagttgttttGTTCACCGGAATACTTCTGAGTTCACCGGAATACTTCTGACGACACCGAACGTGCGACAA
5784_chr15:23650001-23700000_Seq_1993_46151-46180	GCGTCGTTATGGTGCAACGTGTTCACCGGAATACTTCTGAtgataaaaggacaaaggcagccttatcacaGTTCACCGGAATACTTCTGAGTTCACCGGAATACTTCTGACGACACCGAACGTGCGACAA
5787_chr15:23650001-23700000_Seq_2044_47202-47231	GCGTCGTTATGGTGCAACGTGTTCACCGGAATACTTCTGAgcaaccagggggtcctcagaatcctcctggGTTCACCGGAATACTTCTGAGTTCACCGGAATACTTCTGACGACACCGAACGTGCGACAA
5790_chr15:23650001-23700000_Seq_2139_49291-49320	GCGTCGTTATGGTGCAACGTGTTCACCGGAATACTTCTGAttgccctacaaacatctcgcaaattgttggGTTCACCGGAATACTTCTGAGTTCACCGGAATACTTCTGACGACACCGAACGTGCGACAA
5792_chr15:23650001-23700000_Seq_2164_49820-49849	GCGTCGTTATGGTGCAACGTGTTCACCGGAATACTTCTGAagtggttccttcaaatcttgcaaatattttGTTCACCGGAATACTTCTGAGTTCACCGGAATACTTCTGACGACACCGAACGTGCGACAA
[truncated: 19,000 more rows]

## Sheet: Chromatin Tracing Adapters
Cy5_Adapter1	GACTTTGTGGGTACGTTGATGATCCGATTGGAACCGTCCCGATCCGATTGGAACCGTCCC
Cy5_Adapter2	TCGTATTCGCCTTACTGTGTGATCCGATTGGAACCGTCCCGATCCGATTGGAACCGTCCC
Cy5_Adapter3	TAGCGCCTGAATTAGCTATAGATCCGATTGGAACCGTCCCGATCCGATTGGAACCGTCCC
Cy5_Adapter4	GTTCACCGGAATACTTCTGAGATCCGATTGGAACCGTCCCGATCCGATTGGAACCGTCCC
Cy5_Adapter5	TGTTCGAATCCGCCTTCAACGATCCGATTGGAACCGTCCCGATCCGATTGGAACCGTCCC
Cy5_Adapter6	AAATTCCGGAAGCTTGGGCAGATCCGATTGGAACCGTCCCGATCCGATTGGAACCGTCCC
Cy5_Adapter7	TTGGGAACGCCTTCATATCCGATCCGATTGGAACCGTCCCGATCCGATTGGAACCGTCCC
Cy5_Adapter8	CGTGTACGGTCAAATACGAGGATCCGATTGGAACCGTCCCGATCCGATTGGAACCGTCCC
Cy5_Adapter9	GTCGGCTGCGTACTGGTACAGATCCGATTGGAACCGTCCCGATCCGATTGGAACCGTCCC
Cy5_Adapter10	ATCAATCCTCGTTGGCGTTCGATCCGATTGGAACCGTCCCGATCCGATTGGAACCGTCCC
Cy5_Adapter11	ACCGGTTGTCTATATCGTCTGATCCGATTGGAACCGTCCCGATCCGATTGGAACCGTCCC
Cy5_Adapter12	AGGCGATACATGAGAGGCGTGATCCGATTGGAACCGTCCCGATCCGATTGGAACCGTCCC
Cy5_Adapter13	CGAACGACCTGTTACCTTGCGATCCGATTGGAACCGTCCCGATCCGATTGGAACCGTCCC
Cy5_Adapter14	TAGGCGCTTTAGTAGGTACCGATCCGATTGGAACCGTCCCGATCCGATTGGAACCGTCCC
Cy5_Adapter15	AATTTCTCGCATGTCGTGTAGATCCGATTGGAACCGTCCCGATCCGATTGGAACCGTCCC
Cy5_Adapter16	GAACGGCCTCATAAATCGGTGATCCGATTGGAACCGTCCCGATCCGATTGGAACCGTCCC
Cy5_Adapter17	ATCGACCCTTTATAGCGTGTGATCCGATTGGAACCGTCCCGATCCGATTGGAACCGTCCC
Cy5_Adapter18	GGTGGTTGTCACTTTCCGAAGATCCGATTGGAACCGTCCCGATCCGATTGGAACCGTCCC
Cy5_Adapter19	CGTATTGCAGGATCCTTATGGATCCGATTGGAACCGTCCCGATCCGATTGGAACCGTCCC
Cy5_Adapter20	CTACCACGGCATCGATTTAGGATCCGATTGGAACCGTCCCGATCCGATTGGAACCGTCCC
Cy5_Adapter21	ATCAGGTTTACGCCCATGTCGATCCGATTGGAACCGTCCCGATCCGATTGGAACCGTCCC
Cy3_Adapter22	ATGCGAACCGTCTCAAAGCATGCGAACTGTCCGGCTTTCATGCGAACTGTCCGGCTTTCA
Cy3_Adapter23	TGCGACATGTTATGCTAGGCTGCGAACTGTCCGGCTTTCATGCGAACTGTCCGGCTTTCA
Cy3_Adapter24	TGACTGTCGTTGACTCTCGGTGCGAACTGTCCGGCTTTCATGCGAACTGTCCGGCTTTCA
Cy3_Adapter25	GTTAGATGGCCGCTCGGGTTTGCGAACTGTCCGGCTTTCATGCGAACTGTCCGGCTTTCA
Cy3_Adapter26	CATATCGGTCGGCTAACACTTGCGAACTGTCCGGCTTTCATGCGAACTGTCCGGCTTTCA
Cy3_Adapter27	CGGCGAATTTGCTTTCGTTATGCGAACTGTCCGGCTTTCATGCGAACTGTCCGGCTTTCA
Cy3_Adapter28	AATGATGCCTTGCGGTTCTTTGCGAACTGTCCGGCTTTCATGCGAACTGTCCGGCTTTCA
Cy3_Adapter29	TAGAAATATCCGAGTGGCATTGCGAACTGTCCGGCTTTCATGCGAACTGTCCGGCTTTCA
Cy3_Adapter30	GGTGTCGGTTAAATATTCCTTGCGAACTGTCCGGCTTTCATGCGAACTGTCCGGCTTTCA
Cy3_Adapter31	GGGCGTCTGTTACACGTTTGTGCGAACTGTCCGGCTTTCATGCGAACTGTCCGGCTTTCA
Cy3_Adapter32	ATATCGGCTTGTGCCAGCGTTGCGAACTGTCCGGCTTTCATGCGAACTGTCCGGCTTTCA
Cy3_Adapter33	CGGTATGCTGCTTCGTGAACTGCGAACTGTCCGGCTTTCATGCGAACTGTCCGGCTTTCA
Cy3_Adapter34	GAACTCGTTGACTAAGCATTTGCGAACTGTCCGGCTTTCATGCGAACTGTCCGGCTTTCA
Cy3_Adapter35	GCGAAGGTTAGCCTCGAAGCTGCGAACTGTCCGGCTTTCATGCGAACTGTCCGGCTTTCA
Cy3_Adapter36	ATATGTCGATGTCCTTAGACTGCGAACTGTCCGGCTTTCATGCGAACTGTCCGGCTTTCA
Cy3_Adapter37	CGTCTGGATCGTCTATCAATTGCGAACTGTCCGGCTTTCATGCGAACTGTCCGGCTTTCA
Cy3_Adapter38	GGTCACGTACGAGACATTGGTGCGAACTGTCCGGCTTTCATGCGAACTGTCCGGCTTTCA
Cy3_Adapter39	ATTTGAACCAACCTAGCGATTGCGAACTGTCCGGCTTTCATGCGAACTGTCCGGCTTTCA
Cy3_Adapter40	GATCCCGGTCGGATATGTGATGCGAACTGTCCGGCTTTCATGCGAACTGTCCGGCTTTCA
Cy3_Adapter41	TCGTATCTGGCGACTACTACTGCGAACTGTCCGGCTTTCATGCGAACTGTCCGGCTTTCA
Cy3_Adapter42	GTCGTCCGCAGTAATTTGTCTGCGAACTGTCCGGCTTTCATGCGAACTGTCCGGCTTTCA

## Sheet: Readout probes and primers
Cy5 readout probe	/5Cy5/iThioMC6-D/CGCAACGCTTGGGACGGTTCCAATCGGATC
Cy3 readout probe	/5Cy3/iThioMC6-D/TCGGTCAACCTGAAAGCCGGACAGTTCGCA
Forward primer for QPCR	GCCGTACGGATAATACGACTCACTATAGGGGCGTCGTTATGGTGCAACGT
Reverse primer for QPCR	TTGTCGCACGTTCGGTGTCG
Primer for reverse transcription	TTGTCGCACGTTCGGTGTCG
